# Supplementary material for: P–Ru-Complexes with a Chelate-Bridge-Switch: A Comparison of 2-Picolyl and 2-Pyridyloxy Moieties as Bridging Ligands
Source: MDPI journal article supplement (doi:10.3390/molecules27092778), 2022-04-27

---

The following ALERTS were generated. Each ALERT has the format  
**test-name\_ALERT\_alert-type\_alert-level.**

Click on the hyperlinks for more details of the test.

---

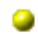

#### Alert level C

PLAT342\_ALERT\_3\_C Low Bond Precision on C-C Bonds ..... 0.00946 Ang.  
PLAT910\_ALERT\_3\_C Missing # of FCF Reflection(s) Below Theta(Min). 5 Note

---

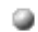

#### Alert level G

PLAT111\_ALERT\_2\_G ADDSYM Detects New (Pseudo) Centre of Symmetry . 83 %Fit  
PLAT113\_ALERT\_2\_G ADDSYM Suggests Possible Pseudo/New Space Group Pnma Check  
PLAT961\_ALERT\_5\_G Dataset Contains no Negative Intensities ..... Please Check  
PLAT967\_ALERT\_5\_G Note: Two-Theta Cutoff Value in Embedded .res .. 56.0 Degree  
PLAT978\_ALERT\_2\_G Number C-C Bonds with Positive Residual Density. 1 Info

---

0 **ALERT level A** = Most likely a serious problem - resolve or explain  
0 **ALERT level B** = A potentially serious problem, consider carefully  
2 **ALERT level C** = Check. Ensure it is not caused by an omission or oversight  
5 **ALERT level G** = General information/check it is not something unexpected

0 ALERT type 1 CIF construction/syntax error, inconsistent or missing data  
3 ALERT type 2 Indicator that the structure model may be wrong or deficient  
2 ALERT type 3 Indicator that the structure quality may be low  
0 ALERT type 4 Improvement, methodology, query or suggestion  
2 ALERT type 5 Informative message, check

---

## Datablock: compound\_4a

---

Bond precision: C-C = 0.0094 A

Wavelength=0.71073

Cell: a=32.2445(9) b=26.2658(8) c=15.8729(4)

alpha=90 beta=103.220(2) gamma=90

Temperature: 180 K

|                        | Calculated                        | Reported                  |
|------------------------|-----------------------------------|---------------------------|
| Volume                 | 13086.9(6)                        | 13086.9(6)                |
| Space group            | P 21/c                            | P 21/c                    |
| Hall group             | -P 2ybc                           | -P 2ybc                   |
| Moiety formula         | C29 H25 N4 O3 P Ru [+<br>solvent] | C29 H25 N4 O3 P Ru, C7 H8 |
| Sum formula            | C29 H25 N4 O3 P Ru [+<br>solvent] | C36 H33 N4 O3 P Ru        |
| Mr                     | 609.57                            | 701.70                    |
| Dx, g cm <sup>-3</sup> | 1.237                             | 1.425                     |
| Z                      | 16                                | 16                        |
| Mu (mm <sup>-1</sup> ) | 0.559                             | 0.570                     |
| F000                   | 4960.0                            | 5760.0                    |
| F000'                  | 4943.09                           |                           |
| h, k, lmax             | 38, 31, 18                        | 38, 31, 18                |
| Nref                   | 23064                             | 23043                     |
| Tmin, Tmax             | 0.892, 0.977                      | 0.899, 0.981              |
| Tmin'                  | 0.892                             |                           |

```
Correction method= # Reported T Limits: Tmin=0.899 Tmax=0.981
AbsCorr = INTEGRATION
```

Data completeness= 0.999

$$\text{Theta (max)} = 25.000$$

```
R(reflections)= 0.0515( 13011)
```

```
wR2 (reflections)=  
0.1246( 23043)
```

$$S = 1.018$$

Npar= 1499

The following ALERTS were generated. Each ALERT has the format

```
test-name_ALERT_alert-type_alert-level.
```

Click on the hyperlinks for more details of the test.

 **Alert level B**

|                           |           |                                 |     |       |
|---------------------------|-----------|---------------------------------|-----|-------|
| PLAT241_ALERT_2_B High    | 'MainMol' | Ueq as Compared to Neighbors of | C90 | Check |
| PLAT910_ALERT_3_B Missing | # of FCF  | Reflection(s) Below Theta(Min). | 21  | Note  |

● Alert level C

|                   |                            |        |                       |                   |       |           |
|-------------------|----------------------------|--------|-----------------------|-------------------|-------|-----------|
| PLAT213_ALERT_2_C | Atom C30A                  |        | has ADP max/min Ratio | .....             | 3.5   | prolat    |
| PLAT213_ALERT_2_C | Atom C31A                  |        | has ADP max/min Ratio | .....             | 3.5   | prolat    |
| PLAT213_ALERT_2_C | Atom C32A                  |        | has ADP max/min Ratio | .....             | 3.5   | prolat    |
| PLAT213_ALERT_2_C | Atom C33A                  |        | has ADP max/min Ratio | .....             | 3.5   | prolat    |
| PLAT213_ALERT_2_C | Atom C34A                  |        | has ADP max/min Ratio | .....             | 3.5   | prolat    |
| PLAT213_ALERT_2_C | Atom C35A                  |        | has ADP max/min Ratio | .....             | 3.5   | prolat    |
| PLAT220_ALERT_2_C | NonSolvent                 | Resd 1 | C                     | Ueq(max)/Ueq(min) | Range | 3.7 Ratio |
| PLAT221_ALERT_2_C | Solv./Anion                | Resd 4 | C                     | Ueq(max)/Ueq(min) | Range | 4.1 Ratio |
| PLAT234_ALERT_4_C | Large Hirshfeld Difference | Ru2    | --N5A                 | .                 |       | 0.17 Anq. |

|                   |                                                  |       |   |             |
|-------------------|--------------------------------------------------|-------|---|-------------|
| PLAT234_ALERT_4_C | Large Hirshfeld Difference C56                   | --C57 | . | 0.16 Ang.   |
| PLAT234_ALERT_4_C | Large Hirshfeld Difference C68                   | --C69 | . | 0.16 Ang.   |
| PLAT234_ALERT_4_C | Large Hirshfeld Difference C91                   | --C92 | . | 0.17 Ang.   |
| PLAT234_ALERT_4_C | Large Hirshfeld Difference C97                   | --C98 | . | 0.17 Ang.   |
| PLAT241_ALERT_2_C | High 'MainMol' Ueq as Compared to Neighbors of   |       |   | 06 Check    |
| PLAT241_ALERT_2_C | High 'MainMol' Ueq as Compared to Neighbors of   |       |   | C56 Check   |
| PLAT241_ALERT_2_C | High 'MainMol' Ueq as Compared to Neighbors of   |       |   | C10 Check   |
| PLAT241_ALERT_2_C | High 'MainMol' Ueq as Compared to Neighbors of   |       |   | C89 Check   |
| PLAT241_ALERT_2_C | High 'MainMol' Ueq as Compared to Neighbors of   |       |   | C114 Check  |
| PLAT242_ALERT_2_C | Low 'MainMol' Ueq as Compared to Neighbors of    |       |   | N8 Check    |
| PLAT242_ALERT_2_C | Low 'MainMol' Ueq as Compared to Neighbors of    |       |   | C88 Check   |
| PLAT242_ALERT_2_C | Low 'MainMol' Ueq as Compared to Neighbors of    |       |   | C91 Check   |
| PLAT242_ALERT_2_C | Low 'MainMol' Ueq as Compared to Neighbors of    |       |   | C112 Check  |
| PLAT242_ALERT_2_C | Low 'MainMol' Ueq as Compared to Neighbors of    |       |   | C116 Check  |
| PLAT250_ALERT_2_C | Large U3/U1 Ratio for Average U(i,j) Tensor .... |       |   | 2.1 Note    |
| PLAT329_ALERT_4_C | Carbon Atom Hybridisation Unclear for .....      |       |   | C36A Check  |
| PLAT329_ALERT_4_C | Carbon Atom Hybridisation Unclear for .....      |       |   | C42A Check  |
| PLAT342_ALERT_3_C | Low Bond Precision on C-C Bonds .....            |       |   | 0.0094 Ang. |
| PLAT906_ALERT_3_C | Large K Value in the Analysis of Variance .....  |       |   | 6.039 Check |
| PLAT906_ALERT_3_C | Large K Value in the Analysis of Variance .....  |       |   | 2.344 Check |
| PLAT934_ALERT_3_C | Number of (Iobs-Icalc)/Sigma(W) > 10 Outliers .. |       |   | 1 Check     |

## ● Alert level G

FORMU01\_ALERT\_2\_G There is a discrepancy between the atom counts in the  
     \_chemical\_formula\_sum and the formula from the \_atom\_site\* data.  
     Atom count from \_chemical\_formula\_sum: C36 H33 N4 O3 P1 Ru1  
     Atom count from the \_atom\_site data: C29 H25 N4 O3 P1 Ru1

CELLZ01\_ALERT\_1\_G Difference between formula and atom\_site contents detected.  
 CELLZ01\_ALERT\_1\_G ALERT: Large difference may be due to a  
     symmetry error - see SYMMG tests  
     From the CIF: \_cell\_formula\_units\_Z 16  
     From the CIF: \_chemical\_formula\_sum C36 H33 N4 O3 P Ru  
     TEST: Compare cell contents of formula and atom\_site data

| atom | Z*formula | cif sites | diff   |
|------|-----------|-----------|--------|
| C    | 576.00    | 464.00    | 112.00 |
| H    | 528.00    | 400.00    | 128.00 |
| N    | 64.00     | 64.00     | 0.00   |
| O    | 48.00     | 48.00     | 0.00   |
| P    | 16.00     | 16.00     | 0.00   |
| Ru   | 16.00     | 16.00     | 0.00   |

|                   |                                                  |           |   |              |
|-------------------|--------------------------------------------------|-----------|---|--------------|
| PLAT002_ALERT_2_G | Number of Distance or Angle Restraints on AtSite |           |   | 36 Note      |
| PLAT041_ALERT_1_G | Calc. and Reported SumFormula Strings Differ     |           |   | Please Check |
| PLAT066_ALERT_1_G | Predicted and Reported Tmin&Tmax Range Identical |           |   | ? Check      |
| PLAT168_ALERT_4_G | The CIF-Embedded .res File Contains EXYZ Records |           |   | 3 Report     |
| PLAT171_ALERT_4_G | The CIF-Embedded .res File Contains EADP Records |           |   | 6 Report     |
| PLAT174_ALERT_4_G | The CIF-Embedded .res File Contains FLAT Records |           |   | 4 Report     |
| PLAT175_ALERT_4_G | The CIF-Embedded .res File Contains SAME Records |           |   | 2 Report     |
| PLAT176_ALERT_4_G | The CIF-Embedded .res File Contains SADI Records |           |   | 17 Report    |
| PLAT187_ALERT_4_G | The CIF-Embedded .res File Contains RIGU Records |           |   | 5 Report     |
| PLAT232_ALERT_2_G | Hirshfeld Test Diff (M-X) Ru2                    | --P2A     | . | 5.9 s.u.     |
| PLAT232_ALERT_2_G | Hirshfeld Test Diff (M-X) Ru2                    | --P2C     | . | 5.9 s.u.     |
| PLAT232_ALERT_2_G | Hirshfeld Test Diff (M-X) Ru1                    | --C19     | . | 5.3 s.u.     |
| PLAT301_ALERT_3_G | Main Residue Disorder .....                      | (Resd 1 ) |   | 39% Note     |
| PLAT302_ALERT_4_G | Anion/Solvent/Minor-Residue Disorder (Resd 2 )   |           |   | 18% Note     |
| PLAT432_ALERT_2_G | Short Inter X...Y Contact O1                     | ..C38A    | . | 2.93 Ang.    |

|                                                                    |               |              |
|--------------------------------------------------------------------|---------------|--------------|
|                                                                    | 1-x,1-y,1-z = | 3_666 Check  |
| PLAT432_ALERT_2_G Short Inter X...Y Contact O7                     | ..C96 .       | 2.98 Ang.    |
|                                                                    | x,y,z =       | 1_555 Check  |
| PLAT606_ALERT_4_G Solvent Accessible VOID(S) in Structure .....    |               | ! Info       |
| PLAT793_ALERT_4_G Model has Chirality at P2B (Centro SPGR)         |               | R Verify     |
| PLAT860_ALERT_3_G Number of Least-Squares Restraints .....         |               | 262 Note     |
| PLAT869_ALERT_4_G ALERTS Related to the Use of SQUEEZE Suppressed  |               | ! Info       |
| PLAT908_ALERT_2_G Max. Perc. Data with I > 2*s(I) per Res.Shell .  |               | 73.69% Note  |
| PLAT909_ALERT_3_G Percentage of I>2sig(I) Data at Theta(Max) Still |               | 34% Note     |
| PLAT913_ALERT_3_G Missing # of Very Strong Reflections in FCF .... |               | 1 Note       |
| PLAT961_ALERT_5_G Dataset Contains no Negative Intensities .....   |               | Please Check |
| PLAT967_ALERT_5_G Note: Two-Theta Cutoff Value in Embedded .res .. |               | 50.0 Degree  |
| PLAT978_ALERT_2_G Number C-C Bonds with Positive Residual Density. |               | 0 Info       |

---

0 **ALERT level A** = Most likely a serious problem - resolve or explain  
 2 **ALERT level B** = A potentially serious problem, consider carefully  
 30 **ALERT level C** = Check. Ensure it is not caused by an omission or oversight  
 29 **ALERT level G** = General information/check it is not something unexpected

4 ALERT type 1 CIF construction/syntax error, inconsistent or missing data  
 29 ALERT type 2 Indicator that the structure model may be wrong or deficient  
 9 ALERT type 3 Indicator that the structure quality may be low  
 17 ALERT type 4 Improvement, methodology, query or suggestion  
 2 ALERT type 5 Informative message, check

---

## Datablock: compound\_5a

---

|                 |                 |                                |
|-----------------|-----------------|--------------------------------|
| Bond precision: | C-C = 0.0032 A  | Wavelength=0.71073             |
| Cell:           | a=9.4331(2)     | b=14.6220(4) c=15.1733(4)      |
|                 | alpha=66.690(2) | beta=75.171(2) gamma=71.763(2) |
| Temperature:    | 180 K           |                                |

|                        | Calculated                           | Reported                           |
|------------------------|--------------------------------------|------------------------------------|
| Volume                 | 1804.44 (8)                          | 1804.44 (9)                        |
| Space group            | P -1                                 | P -1                               |
| Hall group             | -P 1                                 | -P 1                               |
| Moiety formula         | 2 (C33 H34 N5 O2 P Ru), 3 (C H2 Cl2) | C33 H34 N5 O2 P Ru, 1.5 (C H2 Cl2) |
| Sum formula            | C69 H74 Cl6 N10 O4 P2 Ru2            | C34.50 H37 Cl3 N5 O2 P Ru          |
| Mr                     | 1584.16                              | 792.08                             |
| Dx, g cm <sup>-3</sup> | 1.458                                | 1.458                              |
| Z                      | 1                                    | 2                                  |
| Mu (mm <sup>-1</sup> ) | 0.739                                | 0.739                              |
| F000                   | 810.0                                | 810.0                              |
| F000'                  | 808.79                               |                                    |
| h, k, lmax             | 12, 19, 20                           | 12, 19, 20                         |
| Nref                   | 8737                                 | 8731                               |
| Tmin, Tmax             | 0.899, 0.929                         | 0.821, 0.908                       |
| Tmin'                  | 0.772                                |                                    |

Correction method= # Reported T Limits: Tmin=0.821 Tmax=0.908  
AbsCorr = INTEGRATION

Data completeness= 0.999                      Theta(max)= 28.000

R(reflections)= 0.0285 ( 8169)                      wR2(reflections)=  
0.0729 ( 8731)  
S = 1.069                      Npar= 497

The following ALERTS were generated. Each ALERT has the format  
**test-name\_ALERT\_alert-type\_alert-level.**  
Click on the hyperlinks for more details of the test.

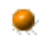

#### Alert level B

PLAT411\_ALERT\_2\_B Short Inter H...H Contact H7B ..H7B . 1.95 Ang.  
1-x,1-y,2-z = 2\_667 Check

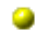

#### Alert level C

PLAT220\_ALERT\_2\_C NonSolvent Resd 1 C Ueq(max)/Ueq(min) Range 4.3 Ratio  
PLAT222\_ALERT\_3\_C NonSolvent Resd 1 H Uiso(max)/Uiso(min) Range 4.7 Ratio  
PLAT242\_ALERT\_2\_C Low 'MainMol' Ueq as Compared to Neighbors of C30 Check  
PLAT260\_ALERT\_2\_C Large Average Ueq of Residue Including C11 0.110 Check  
PLAT260\_ALERT\_2\_C Large Average Ueq of Residue Including C13A 0.197 Check  
PLAT911\_ALERT\_3\_C Missing FCF Refl Between Thmin & STh/L= 0.600 6 Report  
PLAT913\_ALERT\_3\_C Missing # of Very Strong Reflections in FCF .... 6 Note

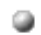

#### Alert level G

|                   |                                                  |       |              |
|-------------------|--------------------------------------------------|-------|--------------|
| PLAT002_ALERT_2_G | Number of Distance or Angle Restraints on AtSite | 15    | Note         |
| PLAT003_ALERT_2_G | Number of Uiso or Uij Restrained non-H Atoms ... | 9     | Report       |
| PLAT042_ALERT_1_G | Calc. and Reported Moiety Formula Strings Differ |       | Please Check |
| PLAT045_ALERT_1_G | Calculated and Reported Z Differ by a Factor ... | 1.    | Check        |
| PLAT154_ALERT_1_G | The s.u.'s on the Cell Angles are Equal ..(Note) | 0.002 | Degree       |
| PLAT171_ALERT_4_G | The CIF-Embedded .res File Contains EADP Records | 2     | Report       |
| PLAT176_ALERT_4_G | The CIF-Embedded .res File Contains SADI Records | 4     | Report       |
| PLAT177_ALERT_4_G | The CIF-Embedded .res File Contains DELU Records | 3     | Report       |
| PLAT178_ALERT_4_G | The CIF-Embedded .res File Contains SIMU Records | 3     | Report       |
| PLAT232_ALERT_2_G | Hirshfeld Test Diff (M-X)    Ru1    --C29    .   | 7.6   | s.u.         |
| PLAT302_ALERT_4_G | Anion/Solvent/Minor-Residue Disorder (Resd 2 )   | 100%  | Note         |
| PLAT302_ALERT_4_G | Anion/Solvent/Minor-Residue Disorder (Resd 3 )   | 100%  | Note         |
| PLAT302_ALERT_4_G | Anion/Solvent/Minor-Residue Disorder (Resd 4 )   | 100%  | Note         |
| PLAT302_ALERT_4_G | Anion/Solvent/Minor-Residue Disorder (Resd 5 )   | 100%  | Note         |
| PLAT302_ALERT_4_G | Anion/Solvent/Minor-Residue Disorder (Resd 6 )   | 100%  | Note         |
| PLAT304_ALERT_4_G | Non-Integer Number of Atoms in ..... (Resd 2 )   | 2.20  | Check        |
| PLAT304_ALERT_4_G | Non-Integer Number of Atoms in ..... (Resd 3 )   | 1.17  | Check        |
| PLAT304_ALERT_4_G | Non-Integer Number of Atoms in ..... (Resd 4 )   | 1.63  | Check        |
| PLAT304_ALERT_4_G | Non-Integer Number of Atoms in ..... (Resd 5 )   | 1.92  | Check        |
| PLAT304_ALERT_4_G | Non-Integer Number of Atoms in ..... (Resd 6 )   | 0.58  | Check        |
| PLAT789_ALERT_4_G | Atoms with Negative _atom_site_disorder_group #  | 10    | Check        |
| PLAT860_ALERT_3_G | Number of Least-Squares Restraints .....         | 71    | Note         |
| PLAT941_ALERT_3_G | Average HKL Measurement Multiplicity .....       | 4.6   | Low          |
| PLAT961_ALERT_5_G | Dataset Contains no Negative Intensities .....   |       | Please Check |
| PLAT967_ALERT_5_G | Note: Two-Theta Cutoff Value in Embedded .res .. | 56.0  | Degree       |
| PLAT978_ALERT_2_G | Number C-C Bonds with Positive Residual Density. | 6     | Info         |

---

0 **ALERT level A** = Most likely a serious problem - resolve or explain  
 1 **ALERT level B** = A potentially serious problem, consider carefully  
 7 **ALERT level C** = Check. Ensure it is not caused by an omission or oversight  
 26 **ALERT level G** = General information/check it is not something unexpected

3 ALERT type 1 CIF construction/syntax error, inconsistent or missing data  
 9 ALERT type 2 Indicator that the structure model may be wrong or deficient  
 5 ALERT type 3 Indicator that the structure quality may be low  
 15 ALERT type 4 Improvement, methodology, query or suggestion  
 2 ALERT type 5 Informative message, check

---

## Datablock: compound\_5b

---

|                 |                |                    |             |
|-----------------|----------------|--------------------|-------------|
| Bond precision: | C-C = 0.0071 A | Wavelength=0.71073 |             |
| Cell:           | a=21.4034(9)   | b=15.1338(7)       | c=8.9456(3) |
|                 | alpha=90       | beta=90            | gamma=90    |
| Temperature:    | 150 K          |                    |             |

|                | Calculated         | Reported           |
|----------------|--------------------|--------------------|
| Volume         | 2897.6(2)          | 2897.6(2)          |
| Space group    | P n m a            | P n m a            |
| Hall group     | -P 2ac 2n          | -P 2ac 2n          |
| Moiety formula | C31 H30 N5 O4 P Ru | C31 H30 N5 O4 P Ru |
| Sum formula    | C31 H30 N5 O4 P Ru | C31 H30 N5 O4 P Ru |
| Mr             | 668.64             | 668.64             |
| Dx, g cm-3     | 1.533              | 1.533              |
| Z              | 4                  | 4                  |
| Mu (mm-1)      | 0.642              | 0.642              |
| F000           | 1368.0             | 1368.0             |
| F000'          | 1363.83            |                    |
| h, k, lmax     | 25, 17, 10         | 25, 17, 10         |
| Nref           | 2656               | 2656               |
| Tmin, Tmax     | 0.940, 0.975       | 0.946, 0.981       |
| Tmin'          | 0.920              |                    |

Correction method= # Reported T Limits: Tmin=0.946 Tmax=0.981  
AbsCorr = INTEGRATION

Data completeness= 1.000                      Theta(max)= 25.000

R(reflections)= 0.0406( 1974)                      wR2(reflections)=  
0.0905( 2656)  
S = 1.078                      Npar= 209

The following ALERTS were generated. Each ALERT has the format

**test-name\_ALERT\_alert-type\_alert-level.**

Click on the hyperlinks for more details of the test.

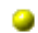

#### Alert level C

|                                                                   |                                           |             |
|-------------------------------------------------------------------|-------------------------------------------|-------------|
| PLAT242_ALERT_2_C Low                                             | 'MainMol' Ueq as Compared to Neighbors of | C18 Check   |
| PLAT906_ALERT_3_C Large K Value in the Analysis of Variance ..... |                                           | 5.862 Check |

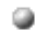

#### Alert level G

|                                                                    |                |   |              |
|--------------------------------------------------------------------|----------------|---|--------------|
| PLAT232_ALERT_2_G Hirshfeld Test Diff (M-X) Ru1                    | --C17          | . | 6.0 s.u.     |
| PLAT300_ALERT_4_G Atom Site Occupancy of H20B                      | Constrained at |   | 0.5 Check    |
| PLAT300_ALERT_4_G Atom Site Occupancy of H20C                      | Constrained at |   | 0.5 Check    |
| PLAT367_ALERT_2_G Long? C(sp?)-C(sp?) Bond C18                     | - C20          | . | 1.52 Ang.    |
| PLAT909_ALERT_3_G Percentage of I>2sig(I) Data at Theta(Max) Still |                |   | 56% Note     |
| PLAT961_ALERT_5_G Dataset Contains no Negative Intensities .....   |                |   | Please Check |
| PLAT967_ALERT_5_G Note: Two-Theta Cutoff Value in Embedded .res .. |                |   | 50.0 Degree  |
| PLAT978_ALERT_2_G Number C-C Bonds with Positive Residual Density. |                |   | 1 Info       |

0 **ALERT level A** = Most likely a serious problem - resolve or explain

0 **ALERT level B** = A potentially serious problem, consider carefully



2 **ALERT level C** = Check. Ensure it is not caused by an omission or oversight  
 8 **ALERT level G** = General information/check it is not something unexpected

0 ALERT type 1 CIF construction/syntax error, inconsistent or missing data  
 4 ALERT type 2 Indicator that the structure model may be wrong or deficient  
 2 ALERT type 3 Indicator that the structure quality may be low  
 2 ALERT type 4 Improvement, methodology, query or suggestion  
 2 ALERT type 5 Informative message, check

## Datablock: compound\_6a

|                        |                                                                    |                           |
|------------------------|--------------------------------------------------------------------|---------------------------|
| Bond precision:        | C-C = 0.0056 A                                                     | Wavelength=0.71073        |
| Cell:                  | a=13.2082 (5)                                                      | b=12.7594 (3)             |
|                        | alpha=90                                                           | beta=97.635 (3)           |
| Temperature:           | 200 K                                                              | gamma=90                  |
|                        | Calculated                                                         | Reported                  |
| Volume                 | 2889.82 (16)                                                       | 2889.82 (16)              |
| Space group            | P 21/n                                                             | P 21/n                    |
| Hall group             | -P 2yn                                                             | -P 2yn                    |
| Moiety formula         | C24 H21 Cl N3 O2 P Ru, C H2 C24 H21 Cl N3 O2 P Ru, Cl2 [+ solvent] | 1.5 (C H2 Cl2)            |
| Sum formula            | C25 H23 Cl3 N3 O2 P Ru [+ solvent]                                 | C25.50 H24 Cl4 N3 O2 P Ru |
| Mr                     | 635.85                                                             | 678.32                    |
| Dx, g cm <sup>-3</sup> | 1.462                                                              | 1.559                     |
| Z                      | 4                                                                  | 4                         |
| Mu (mm <sup>-1</sup> ) | 0.901                                                              | 0.996                     |
| F000                   | 1280.0                                                             | 1364.0                    |
| F000'                  | 1277.48                                                            |                           |
| h, k, lmax             | 16, 16, 22                                                         | 16, 16, 22                |
| Nref                   | 6316                                                               | 6315                      |
| Tmin, Tmax             | 0.787, 0.861                                                       | 0.800, 0.924              |
| Tmin'                  | 0.706                                                              |                           |

Correction method= # Reported T Limits: Tmin=0.800 Tmax=0.924  
 AbsCorr = INTEGRATION

Data completeness= 1.000      Theta(max)= 27.000

|                                |                                  |
|--------------------------------|----------------------------------|
| R(reflections)= 0.0384 ( 5475) | wR2(reflections)= 0.0865 ( 6315) |
| S = 1.081                      | Npar= 316                        |

---

The following ALERTS were generated. Each ALERT has the format

**test-name\_ALERT\_alert-type\_alert-level.**

Click on the hyperlinks for more details of the test.

---

● **Alert level C**

PLAT244\_ALERT\_4\_C Low 'Solvent' Ueq as Compared to Neighbors of C25 Check  
PLAT906\_ALERT\_3\_C Large K Value in the Analysis of Variance ..... 3.976 Check

---

● **Alert level G**

FORMU01\_ALERT\_2\_G There is a discrepancy between the atom counts in the  
\_chemical\_formula\_sum and the formula from the \_atom\_site\* data.  
Atom count from \_chemical\_formula\_sum: C25.5 H24 Cl4 N3 O2 P1 Ru1  
Atom count from the \_atom\_site data: C25 H23 Cl3 N3 O2 P1 Ru1

CELLZ01\_ALERT\_1\_G Difference between formula and atom\_site contents detected.

CELLZ01\_ALERT\_1\_G ALERT: Large difference may be due to a

symmetry error - see SYMMG tests

From the CIF: \_cell\_formula\_units\_Z 4

From the CIF: \_chemical\_formula\_sum C25.50 H24 Cl4 N3 O2 P Ru

TEST: Compare cell contents of formula and atom\_site data

| atom | Z*formula | cif sites | diff |
|------|-----------|-----------|------|
| C    | 102.00    | 100.00    | 2.00 |
| H    | 96.00     | 92.00     | 4.00 |
| Cl   | 16.00     | 12.00     | 4.00 |
| N    | 12.00     | 12.00     | 0.00 |
| O    | 8.00      | 8.00      | 0.00 |
| P    | 4.00      | 4.00      | 0.00 |
| Ru   | 4.00      | 4.00      | 0.00 |

|                   |                                                  |                |              |
|-------------------|--------------------------------------------------|----------------|--------------|
| PLAT041_ALERT_1_G | Calc. and Reported SumFormula                    | Strings Differ | Please Check |
| PLAT042_ALERT_1_G | Calc. and Reported Moiety Formula                | Strings Differ | Please Check |
| PLAT051_ALERT_1_G | Mu(calc) and Mu(CIF) Ratio Differs from 1.0 by . |                | 9.53 %       |
| PLAT230_ALERT_2_G | Hirshfeld Test Diff for O2                       | --C24 .        | 5.5 s.u.     |
| PLAT232_ALERT_2_G | Hirshfeld Test Diff (M-X) Ru1                    | --C24 .        | 8.2 s.u.     |
| PLAT605_ALERT_4_G | Largest Solvent Accessible VOID in the Structure |                | 178 A**3     |
| PLAT869_ALERT_4_G | ALERTS Related to the Use of SQUEEZE             | Suppressed     | ! Info       |
| PLAT961_ALERT_5_G | Dataset Contains no Negative Intensities .....   |                | Please Check |
| PLAT965_ALERT_2_G | The SHELXL WEIGHT Optimisation has not Converged |                | Please Check |
| PLAT967_ALERT_5_G | Note: Two-Theta Cutoff Value in Embedded .res .. |                | 54.0 Degree  |
| PLAT978_ALERT_2_G | Number C-C Bonds with Positive Residual Density. |                | 1 Info       |

---

- 0 **ALERT level A** = Most likely a serious problem - resolve or explain  
0 **ALERT level B** = A potentially serious problem, consider carefully  
2 **ALERT level C** = Check. Ensure it is not caused by an omission or oversight  
14 **ALERT level G** = General information/check it is not something unexpected

- 5 ALERT type 1 CIF construction/syntax error, inconsistent or missing data  
5 ALERT type 2 Indicator that the structure model may be wrong or deficient  
1 ALERT type 3 Indicator that the structure quality may be low  
3 ALERT type 4 Improvement, methodology, query or suggestion  
2 ALERT type 5 Informative message, check
-

## checkCIF publication errors

---

### Alert level A

PUBL004\_ALERT\_1\_A The contact author's name and address are missing,  
\_publ\_contact\_author\_name and \_publ\_contact\_author\_address.  
PUBL005\_ALERT\_1\_A \_publ\_contact\_author\_email, \_publ\_contact\_author\_fax and  
\_publ\_contact\_author\_phone are all missing.  
At least one of these should be present.  
PUBL006\_ALERT\_1\_A \_publ\_requested\_journal is missing  
e.g. 'Acta Crystallographica Section C'  
PUBL008\_ALERT\_1\_A \_publ\_section\_title is missing. Title of paper.  
PUBL009\_ALERT\_1\_A \_publ\_author\_name is missing. List of author(s) name(s).  
PUBL010\_ALERT\_1\_A \_publ\_author\_address is missing. Author(s) address(es).  
PUBL012\_ALERT\_1\_A \_publ\_section\_abstract is missing.  
Abstract of paper in English.

---

### Alert level G

PUBL017\_ALERT\_1\_G The \_publ\_section\_references section is missing or  
empty.

---

7 **ALERT level A** = Data missing that is essential or data in wrong format  
1 **ALERT level G** = General alerts. Data that may be required is missing

---

## Publication of your CIF

You should attempt to resolve as many as possible of the alerts in all categories. Often the minor alerts point to easily fixed oversights, errors and omissions in your CIF or refinement strategy, so attention to these fine details can be worthwhile. In order to resolve some of the more serious problems it may be necessary to carry out additional measurements or structure refinements. However, the nature of your study may justify the reported deviations from journal submission requirements and the more serious of these should be commented upon in the discussion or experimental section of a paper or in the "special\_details" fields of the CIF. *checkCIF* was carefully designed to identify outliers and unusual parameters, but every test has its limitations and alerts that are not important in a particular case may appear. Conversely, the absence of alerts does not guarantee there are no aspects of the results needing attention. It is up to the individual to critically assess their own results and, if necessary, seek expert advice.

If level A alerts remain, which you believe to be justified deviations, and you intend to submit this CIF for publication in a journal, you should additionally insert an explanation in your CIF using the Validation Reply Form (VRF) below. This will allow your explanation to be considered as part of the review process.

## Validation response form

Please find below a validation response form (VRF) that can be filled in and pasted into your CIF.

```
# start Validation Reply Form
_vrf_PUBL004_GLOBAL
;
PROBLEM: The contact author's name and address are missing,
RESPONSE: ...
;
_vrf_PUBL005_GLOBAL
;
PROBLEM: _publ_contact_author_email, _publ_contact_author_fax and
RESPONSE: ...
;
_vrf_PUBL006_GLOBAL
;
PROBLEM: _publ_requested_journal is missing
RESPONSE: ...
;
_vrf_PUBL008_GLOBAL
;
PROBLEM: _publ_section_title is missing. Title of paper.
RESPONSE: ...
;
_vrf_PUBL009_GLOBAL
;
PROBLEM: _publ_author_name is missing. List of author(s) name(s).
RESPONSE: ...
;
_vrf_PUBL010_GLOBAL
;
PROBLEM: _publ_author_address is missing. Author(s) address(es).
RESPONSE: ...
;
_vrf_PUBL012_GLOBAL
;
PROBLEM: _publ_section_abstract is missing.
RESPONSE: ...
;
# end Validation Reply Form
```

If you wish to submit your CIF for publication in Acta Crystallographica Section C or E, you should upload your CIF via the web. If you wish to submit your CIF for publication in IUCrData you should upload your CIF via the web. If your CIF is to form part of a submission to another IUCr journal, you will be asked, either during electronic submission or by the Co-editor handling your paper, to upload your CIF via our web site.

---

**PLATON version of 19/02/2022; check.def file version of 19/01/2022**

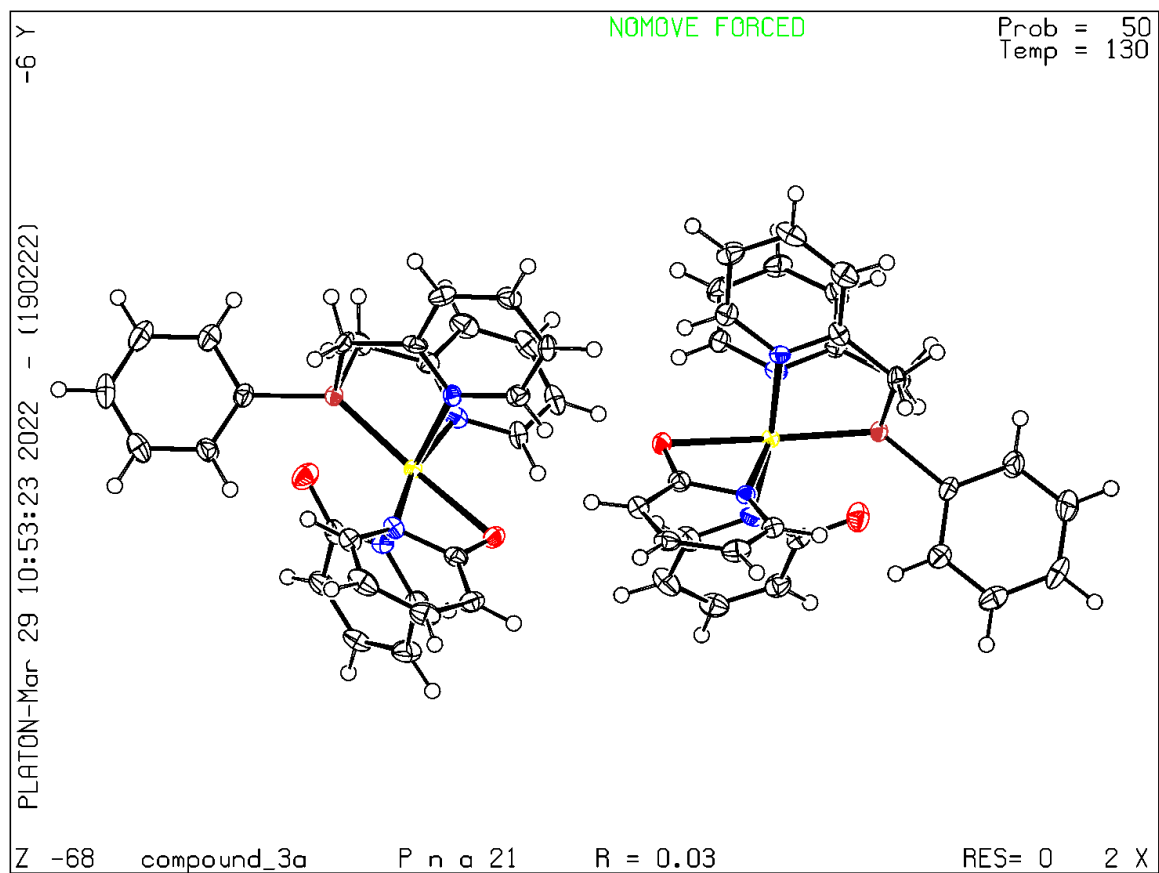

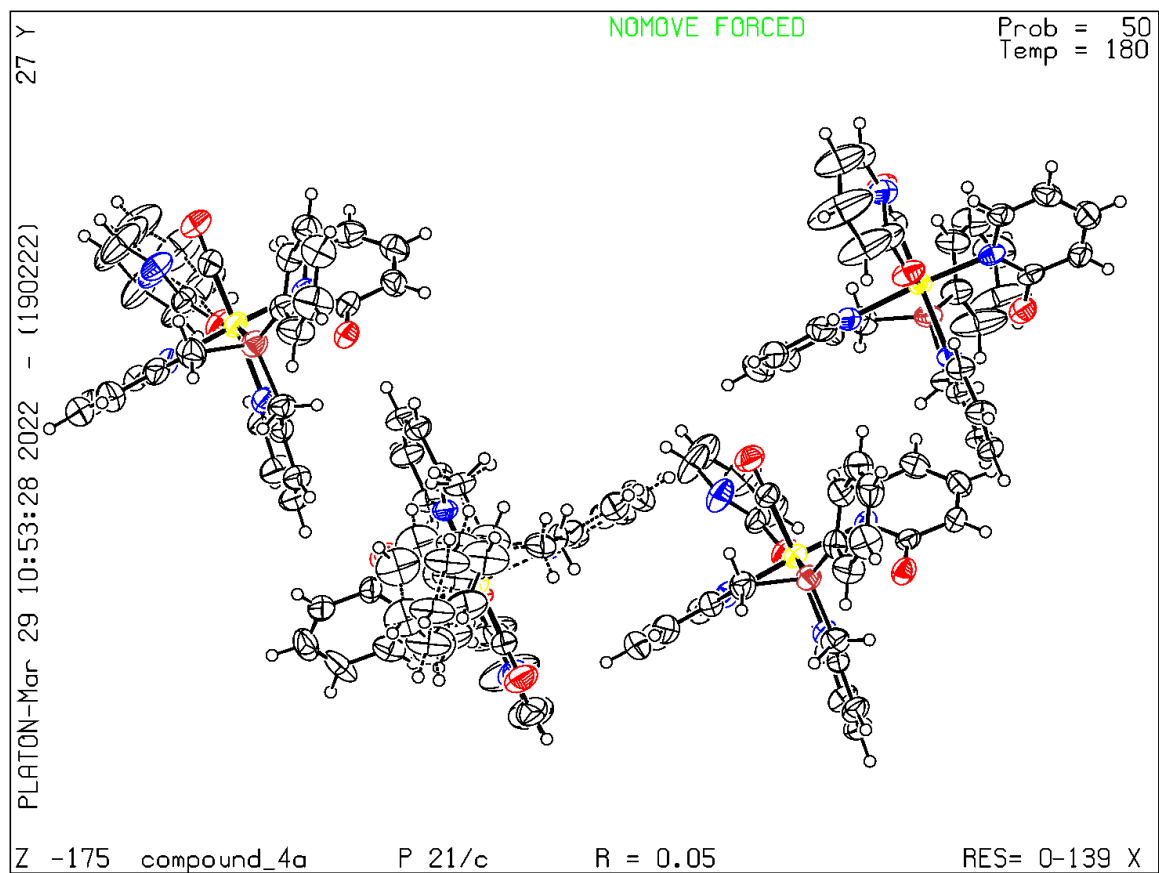

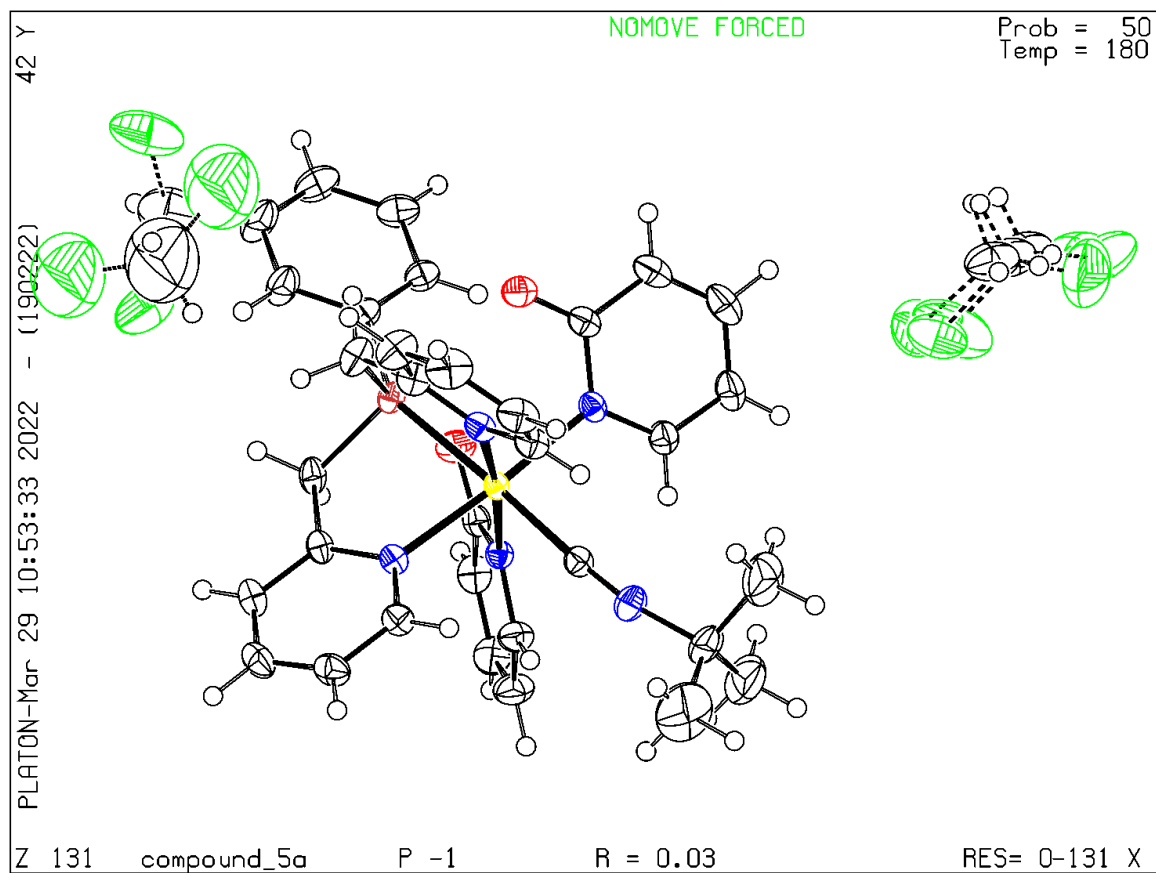

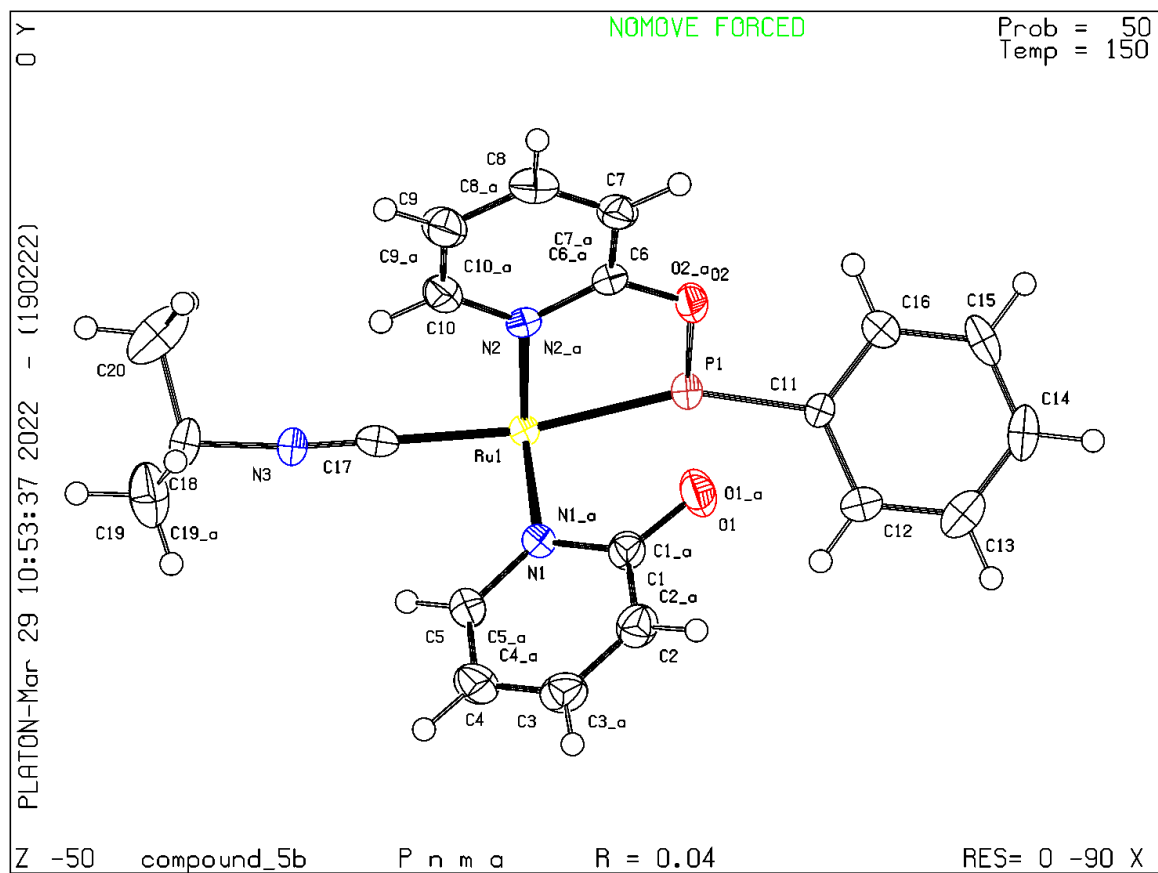



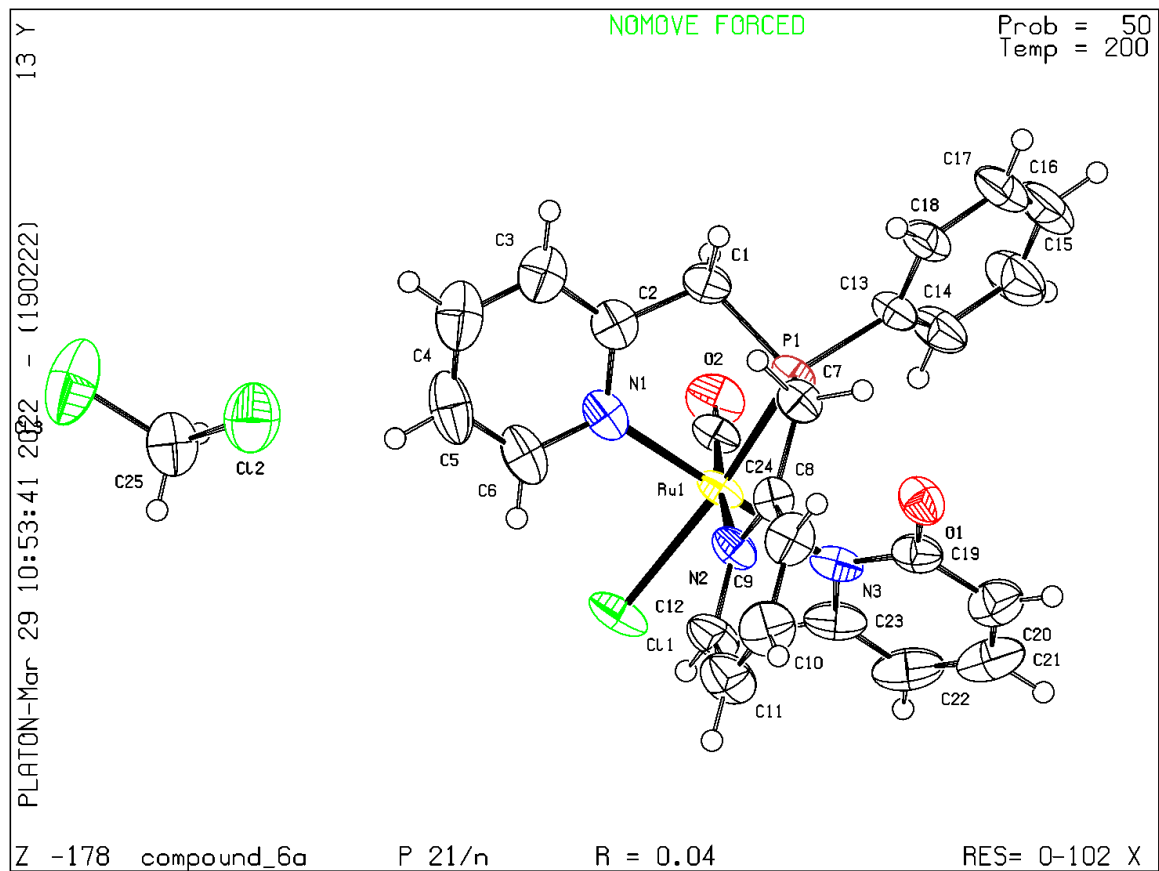

Supplement: s1 [file s1]
