# Supplementary material for: P–Ru-Complexes with a Chelate-Bridge-Switch: A Comparison of 2-Picolyl and 2-Pyridyloxy Moieties as Bridging Ligands
Source: MDPI journal article supplement (doi:10.3390/molecules27092778), 2022-04-27
Supplement: s1 [file s1]

Supporting information for:

# **P–Ru-Complexes with a Chelate-Bridge-Switch: A Comparison of 2-Picolyl and 2-Pyridyloxy Moieties as Bridging Ligands**

Lisa Ehrlich,<sup>1</sup> Robert Gericke,<sup>1,2</sup> Erica Brendler,<sup>3</sup> and Jörg Wagler<sup>1</sup>

<sup>1</sup> Technische Universität Bergakademie Freiberg, Institut für Anorganische Chemie,  
Leipziger Straße 29, 09596 Freiberg, Germany

<sup>2</sup> Helmholtz-Zentrum Dresden-Rossendorf e.V., Institute of Resource Ecology, Bautzner  
Landstraße 400, 01328 Dresden, Germany

<sup>3</sup> Technische Universität Bergakademie Freiberg, Institut für Analytische Chemie, Leipziger  
Straße 29, 09596 Freiberg, Germany

# Contents

NMR spectra ( $^1\text{H}$ ,  $^{13}\text{C}$ ,  $^{31}\text{P}$ ) of compounds **3a**, **4a**, **5a**, **5b**, **6a**.

Sets of graphical representation, total energies in a.u. (PBE0: final single point energy and final Gibbs free energy; B2T-PLYP: final single point energy) and atomic coordinates of optimized molecular structures of **4a<sup>1</sup>**, **4a<sup>2</sup>**, **4a<sup>3</sup>**, **4a<sup>4</sup>**, **4a<sup>5</sup>**, **4a<sup>6</sup>**, **4a<sup>7</sup>**, **5a<sup>1</sup>**, **5a<sup>3</sup>**, **5b<sup>1</sup>**, **5b<sup>3</sup>**, **4b<sup>1</sup>**, **4b<sup>3</sup>**.

Graphical representations of NLMOs and NBOs

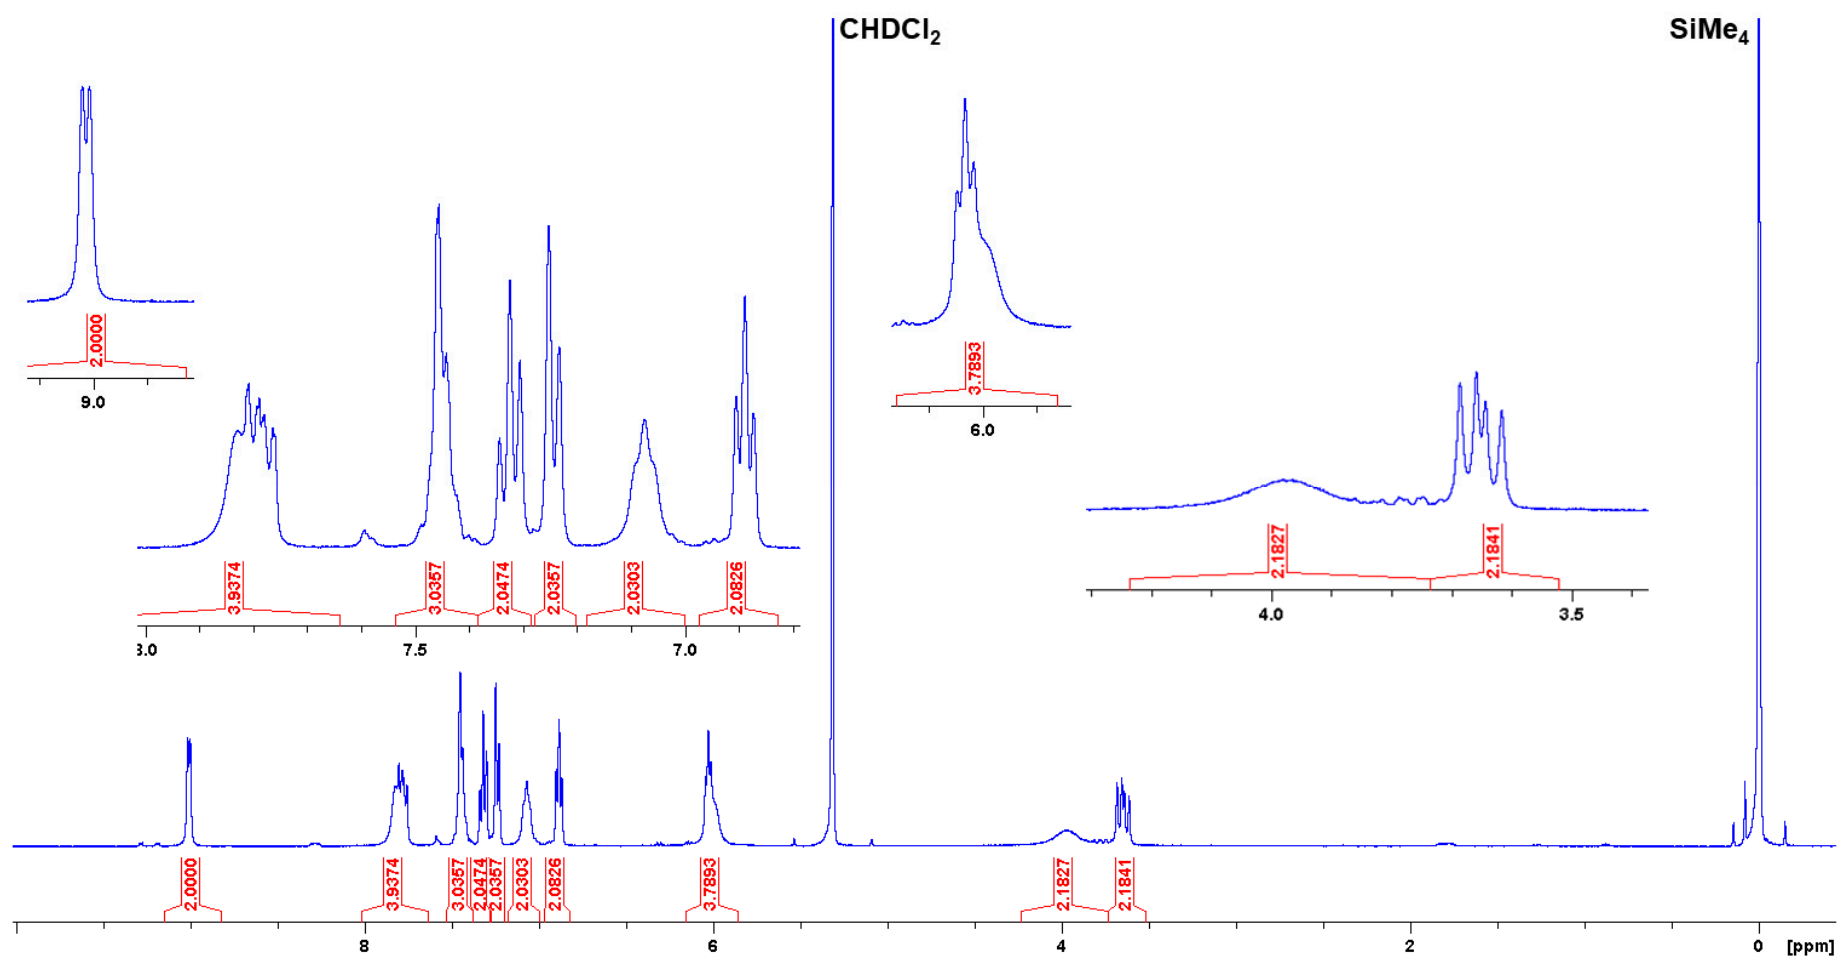

**Figure S1.**  $^1\text{H}$  NMR spectrum of **3a** in  $\text{CD}_2\text{Cl}_2$  (full spectrum and magnified insets of the (groups of) signals).

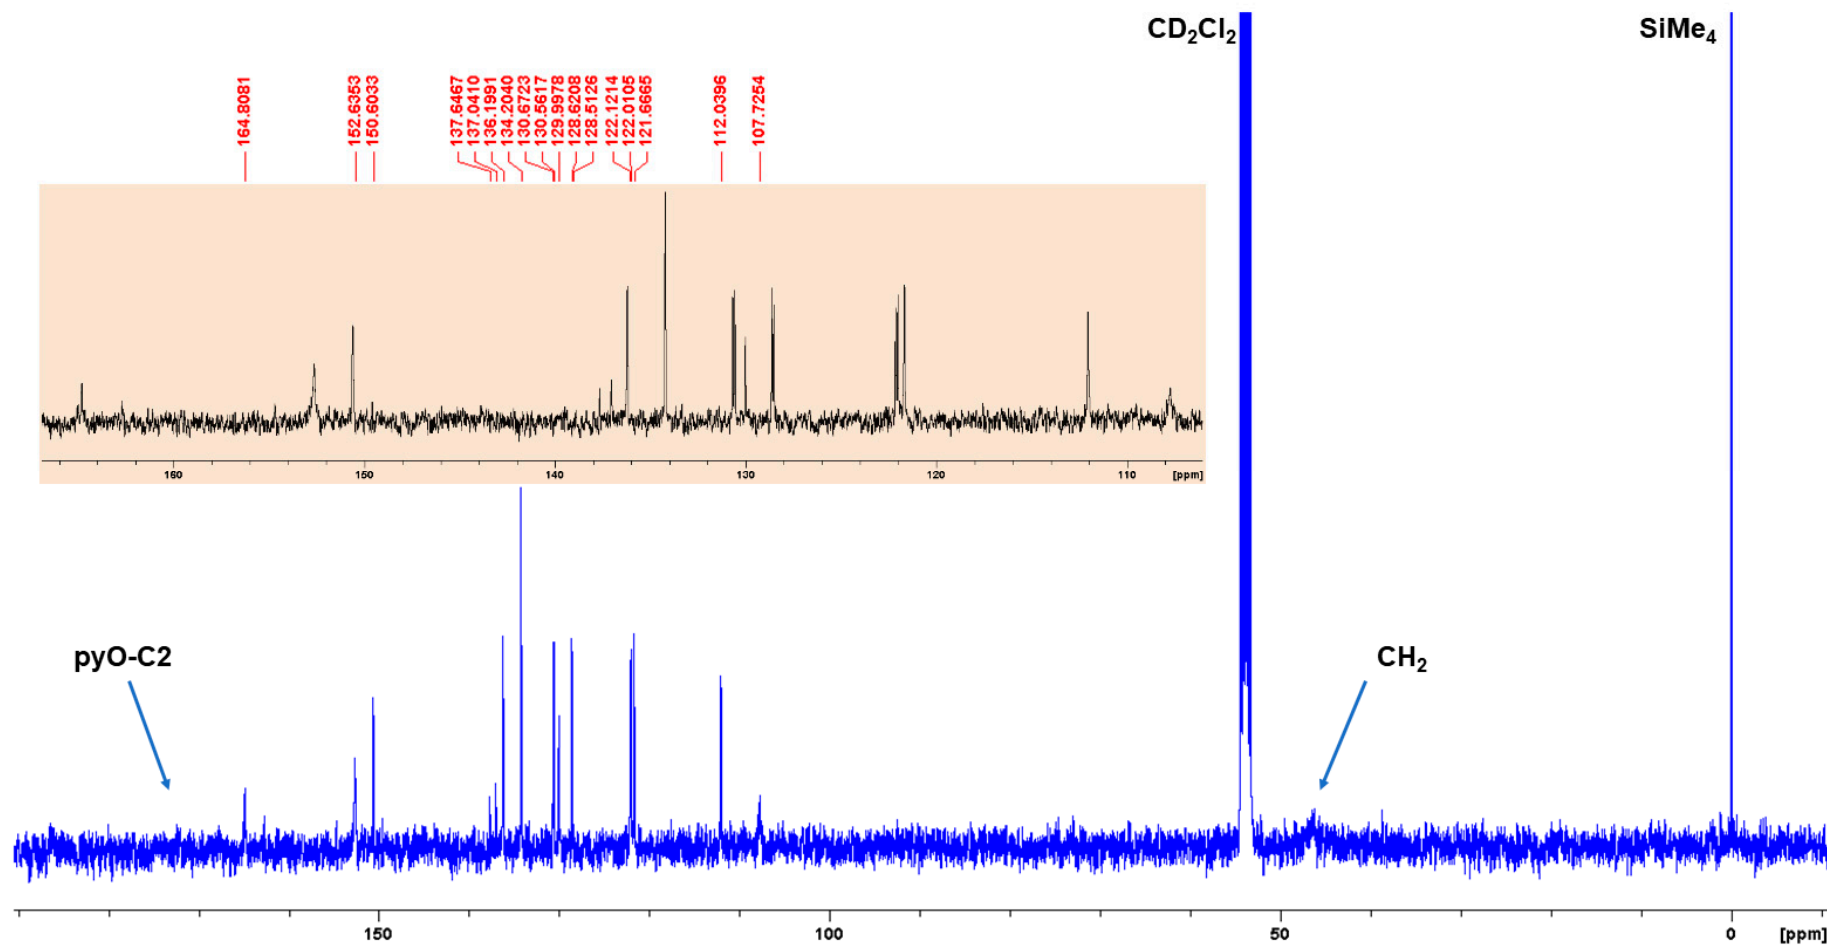

**Figure S2.**  $^{13}\text{C}\{^1\text{H}\}$  NMR spectrum of **3a** in  $\text{CD}_2\text{Cl}_2$  (full spectrum and magnified inset of the aryl part of signals). The location of the  $\text{CH}_2$  and pyO-C2 signals was further confirmed by correlations in the  $^1\text{H}/^{13}\text{C}$ -HSQC and  $^1\text{H}/^{13}\text{C}$ -HMBC spectra, respectively.

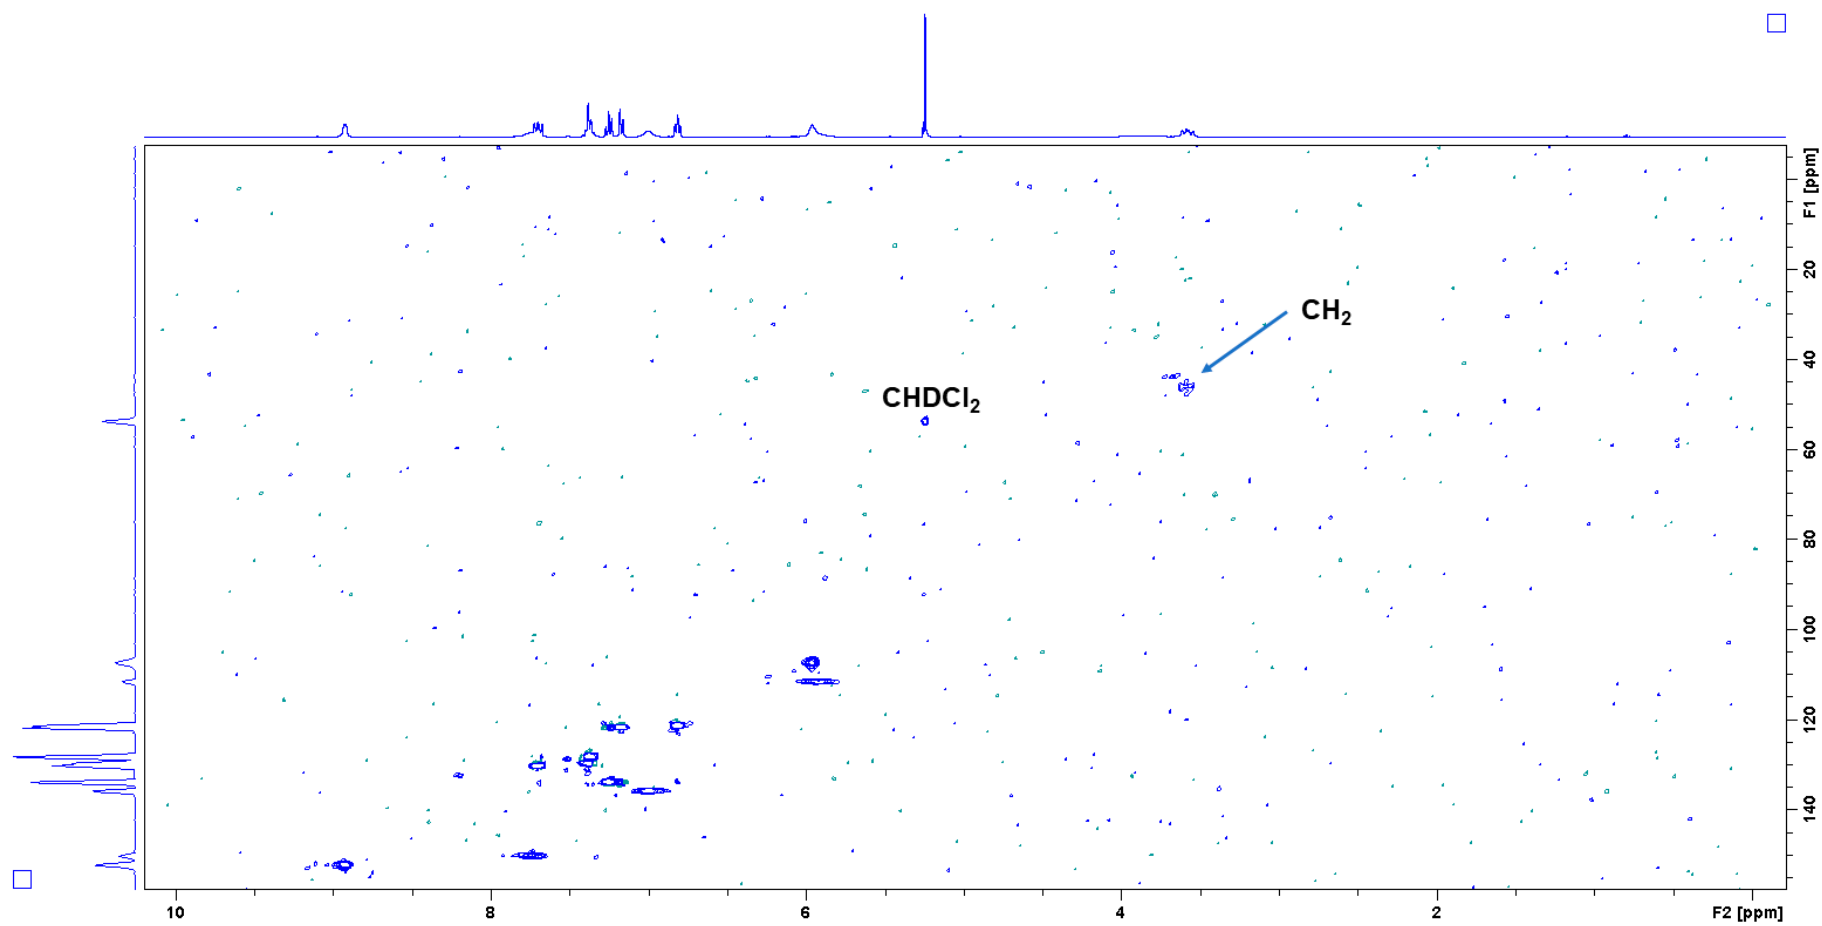

**Figure S3.**  $^1\text{H}/^{13}\text{C}$ -HSQC NMR spectrum of **3a** in  $\text{CD}_2\text{Cl}_2$ .

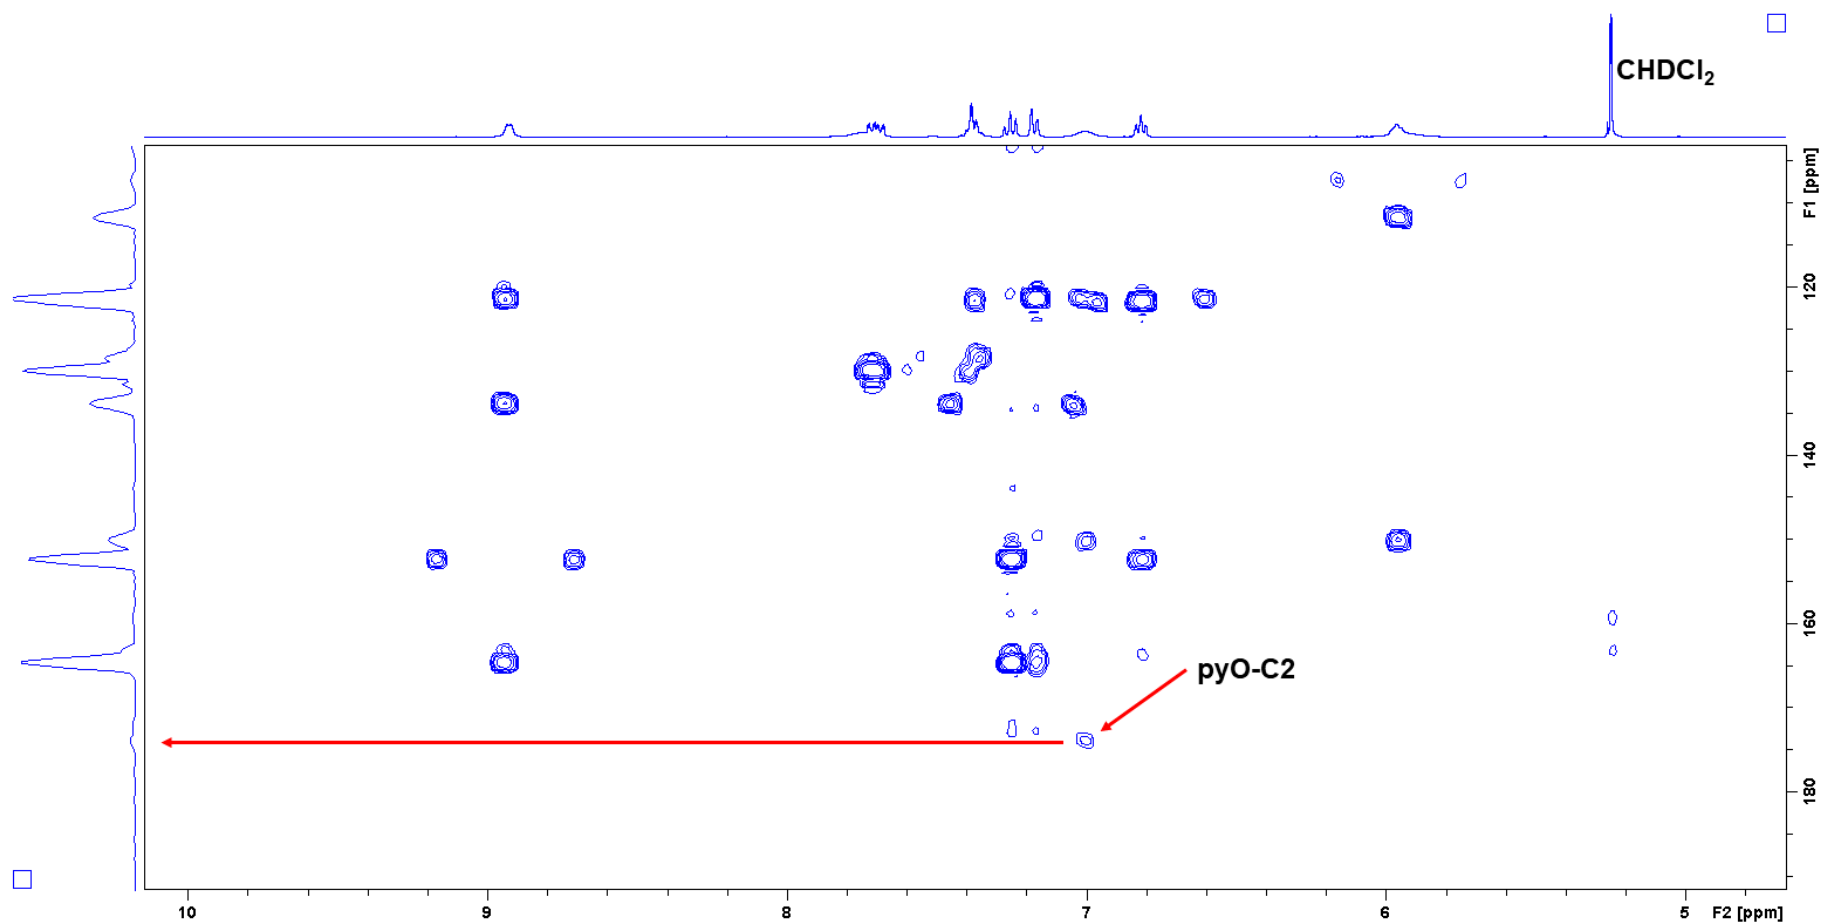

**Figure S4.**  $^1\text{H}/^{13}\text{C}$ -HMBC NMR spectrum of **3a** in  $\text{CD}_2\text{Cl}_2$ . (The correlation between  $^{13}\text{C}(\text{pyO-C2})$  and  $^1\text{H}(\text{pyO-H4})$ , highlighted with a red arrow, confirmed the  $^{13}\text{C}$  NMR shift of the pyO-C2 signal.)

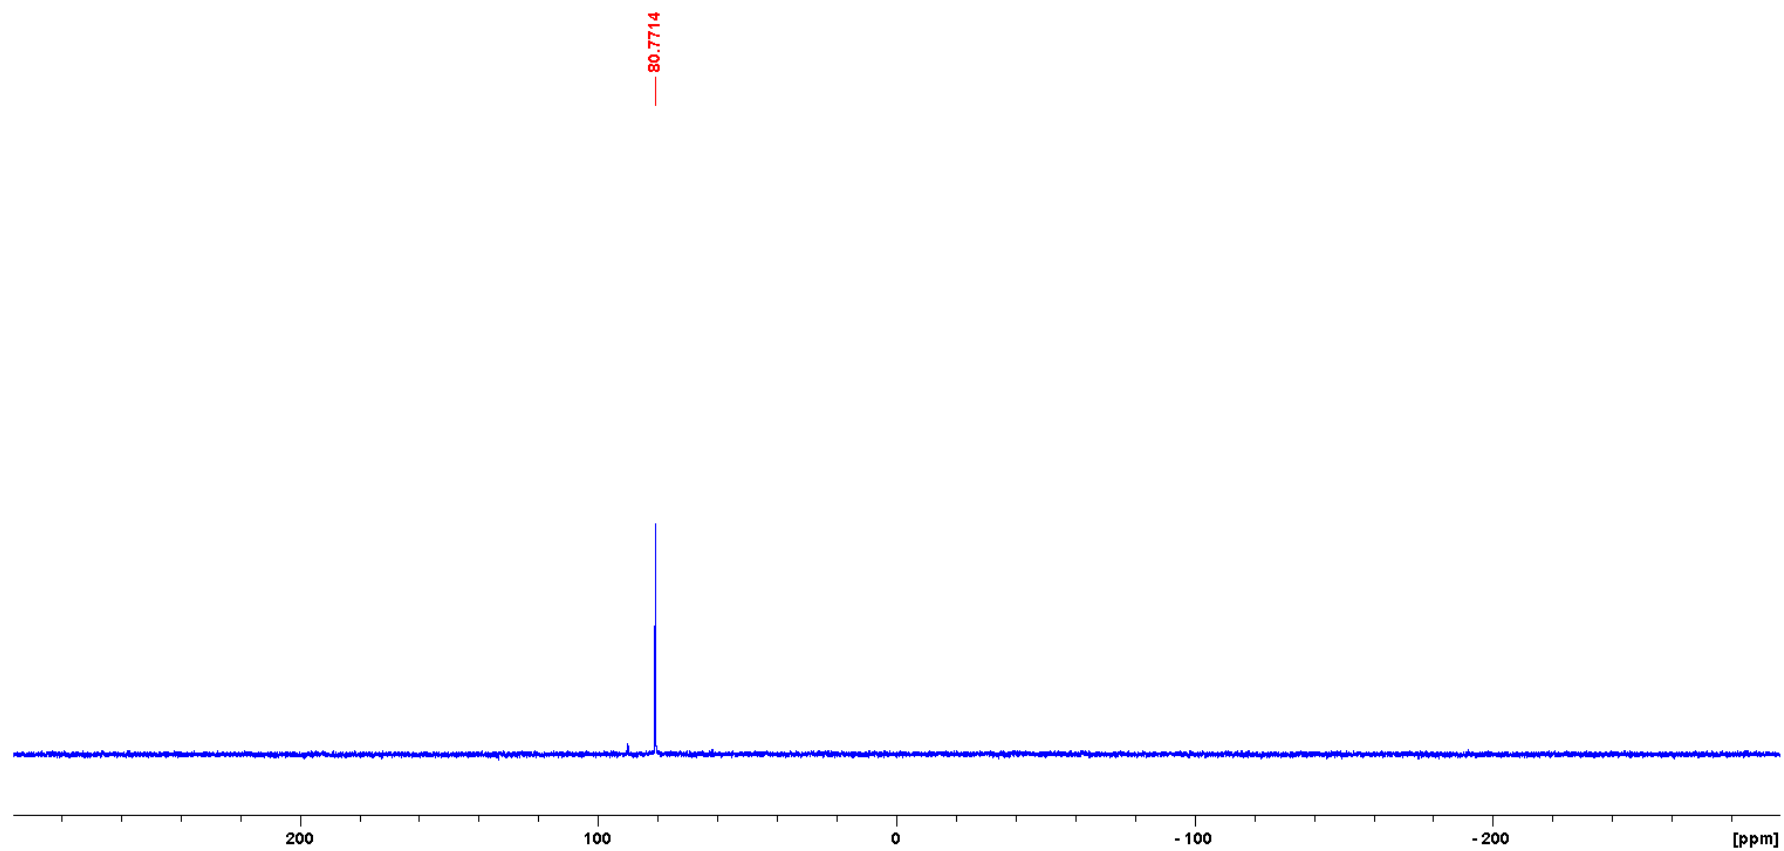

**Figure S5.**  $^{31}\text{P}\{^1\text{H}\}$  NMR spectrum of **3a** in  $\text{CD}_2\text{Cl}_2$ .

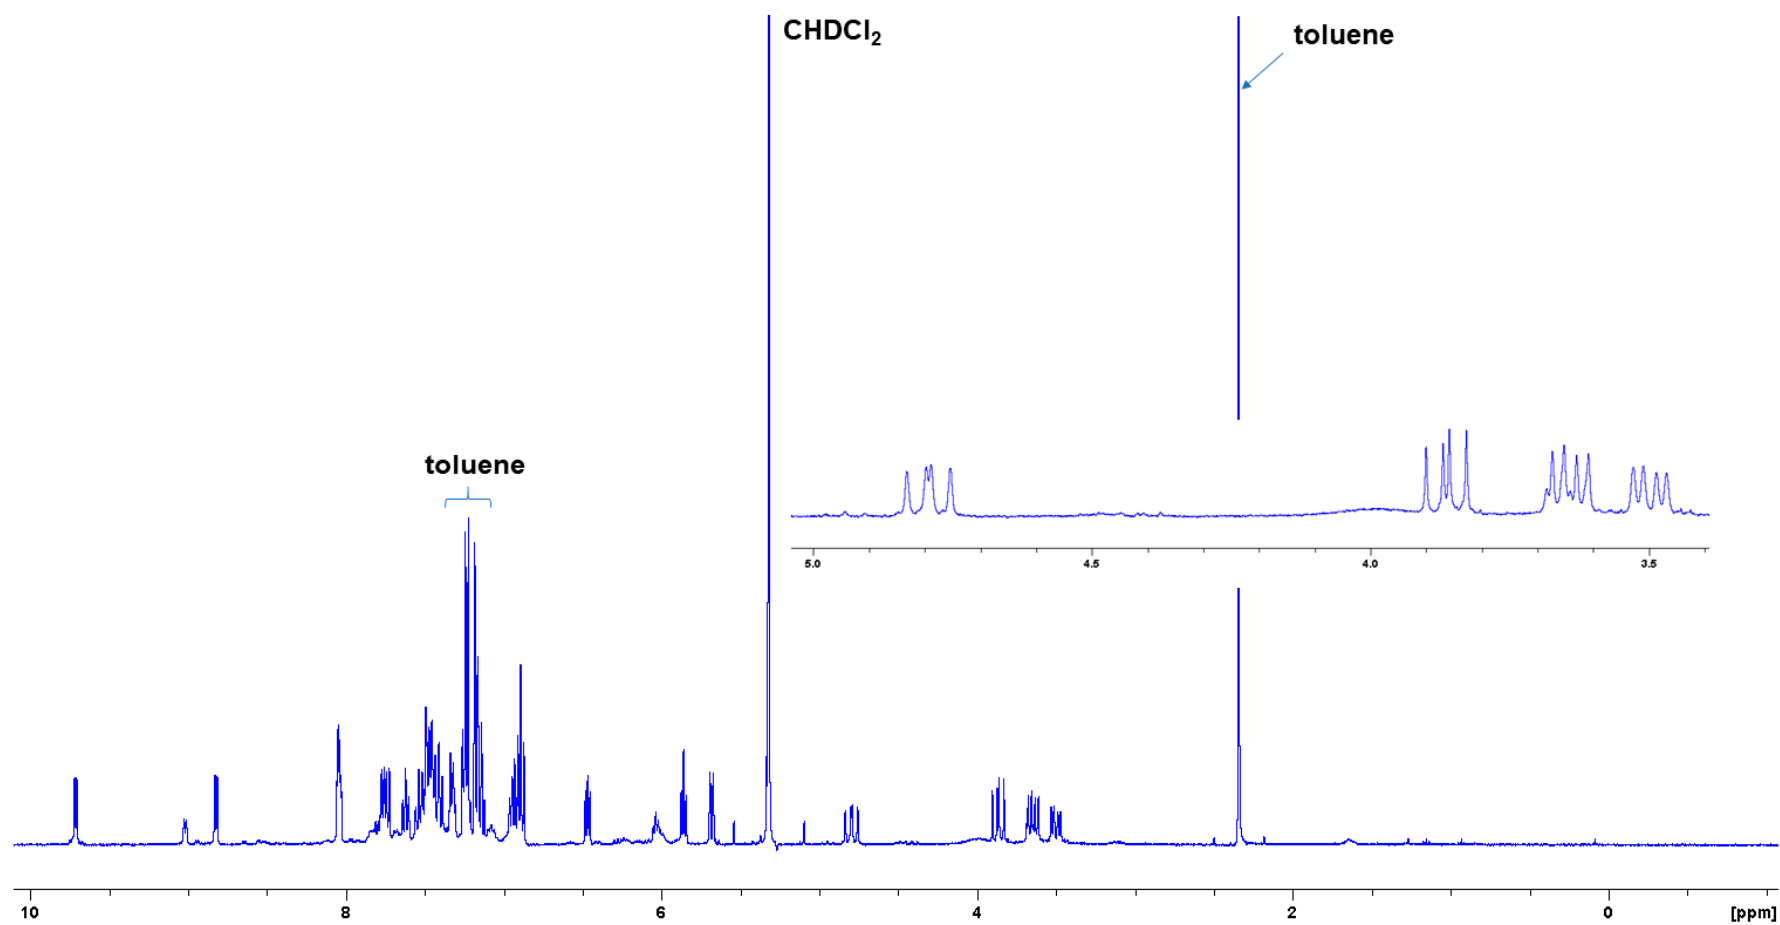

**Figure S6.**  $^1\text{H}$  NMR spectrum of (4a · toluene) in  $\text{CD}_2\text{Cl}_2$  (full spectrum and magnified inset of the groups' signals).



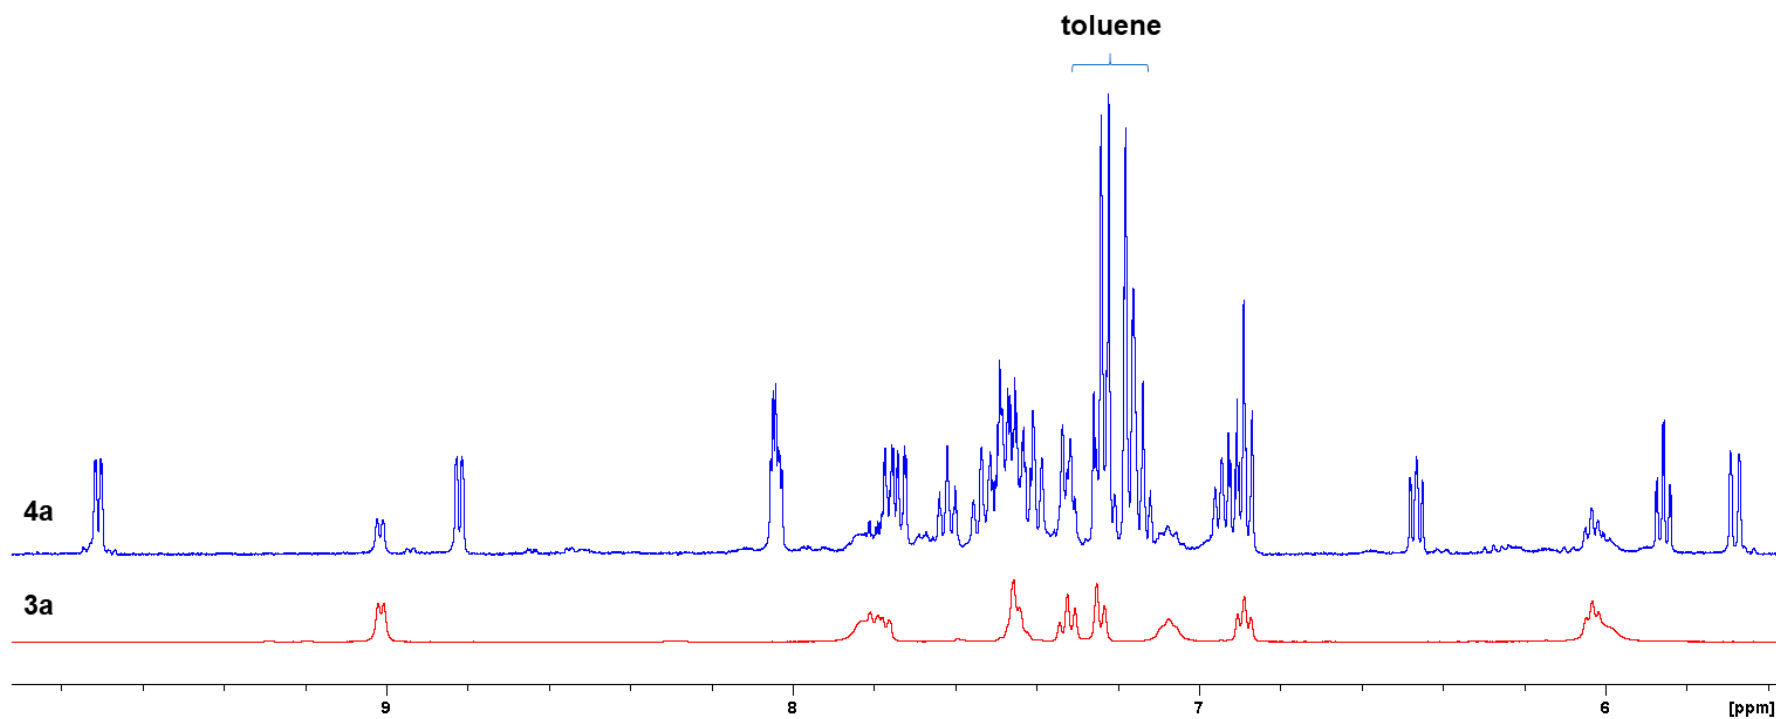

**Figure S7.** Aryl part of the  $^1\text{H}$  NMR spectrum of (**4a** · toluene) in  $\text{CD}_2\text{Cl}_2$  (blue) and overlay of the spectrum of **3a** (red), which is contained in the product as a contamination.

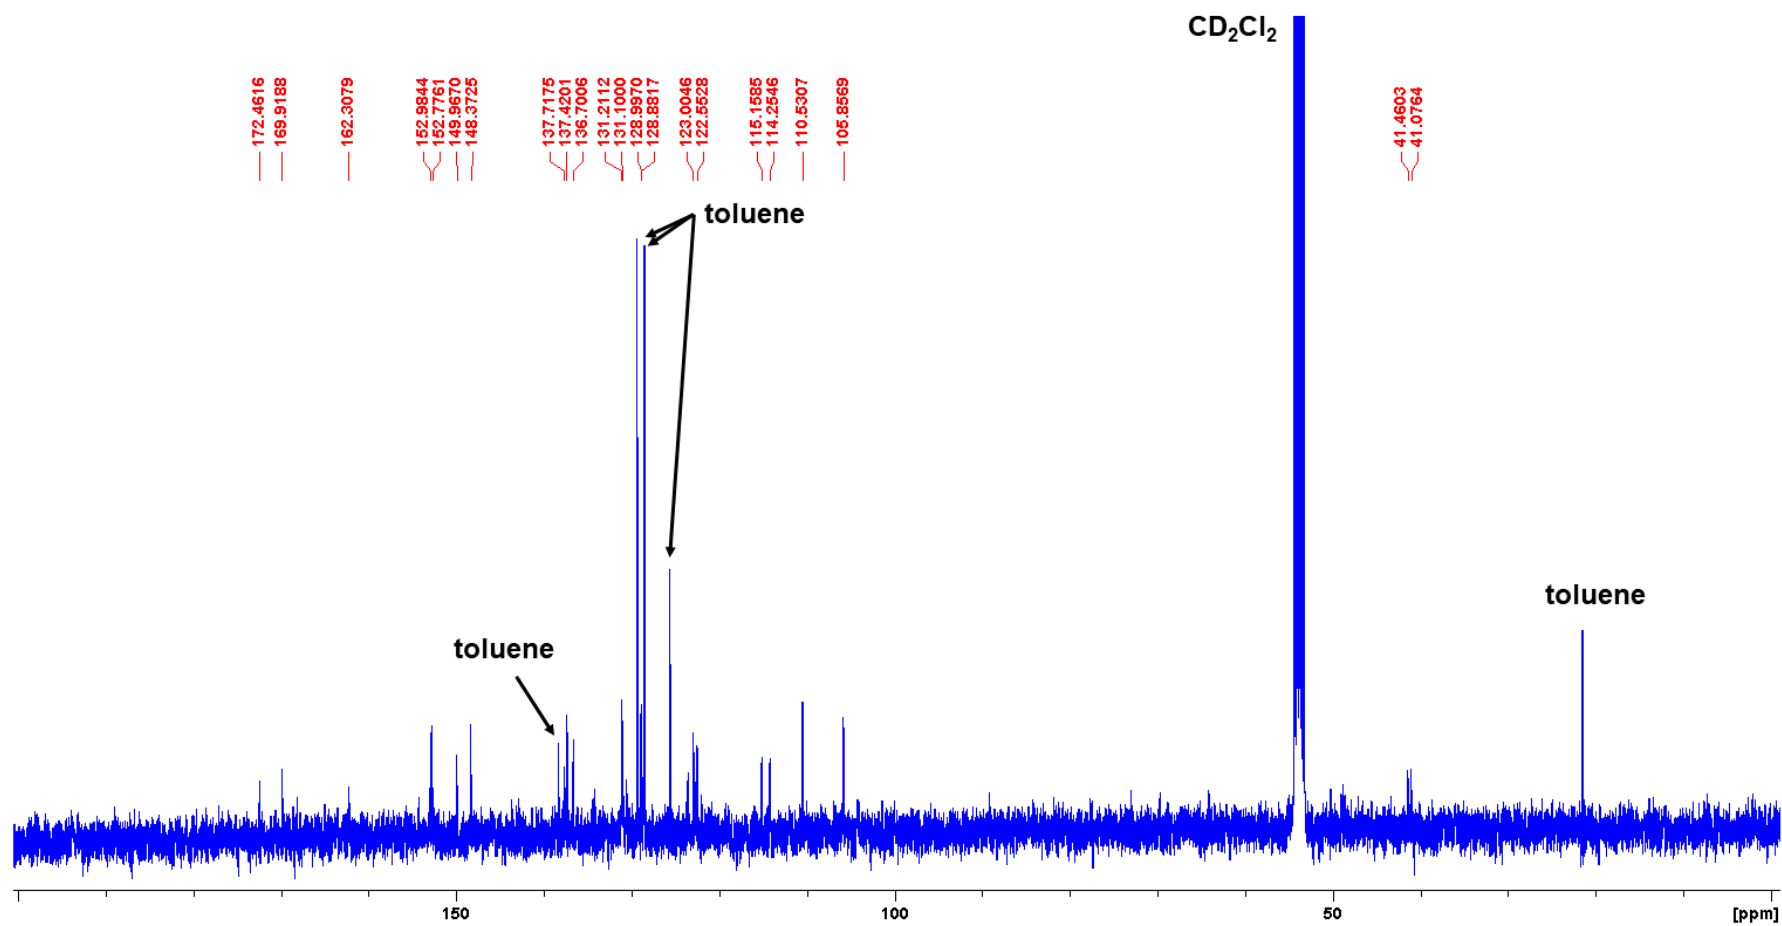

**Figure S8.**  $^{13}\text{C}\{^1\text{H}\}$  NMR spectrum of (**4a** · toluene) in  $\text{CD}_2\text{Cl}_2$ .

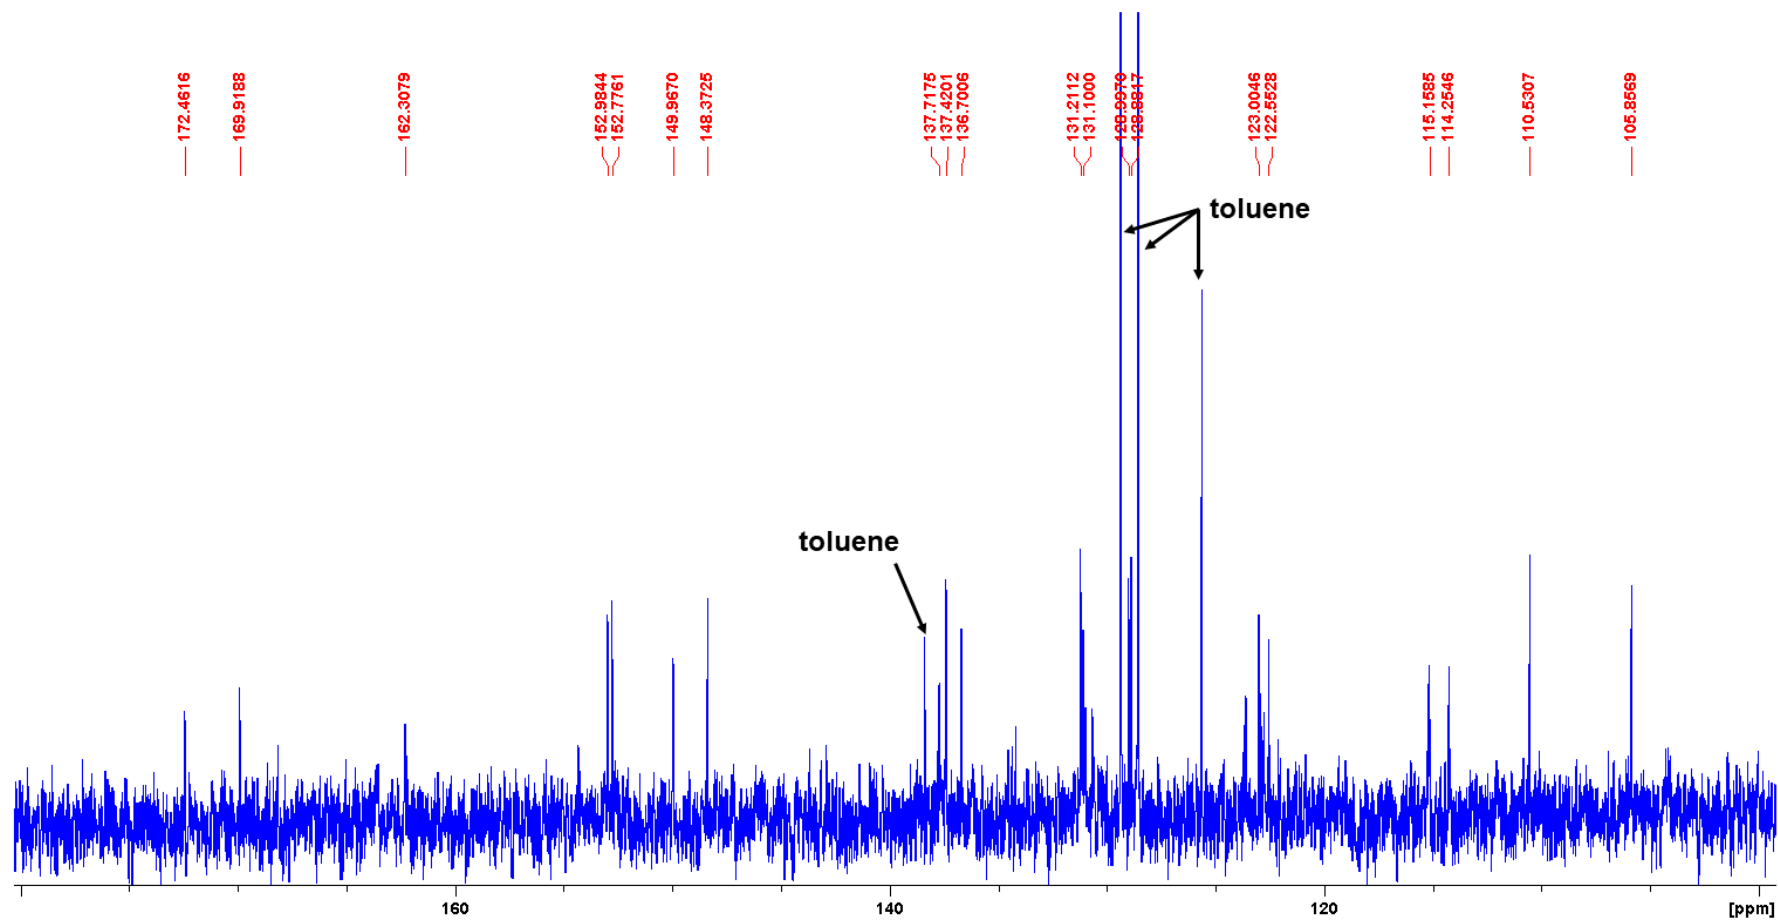

**Figure S9.** Aryl section of the  $^{13}\text{C}\{^1\text{H}\}$  NMR spectrum of (**4a** · toluene) in  $\text{CD}_2\text{Cl}_2$ .

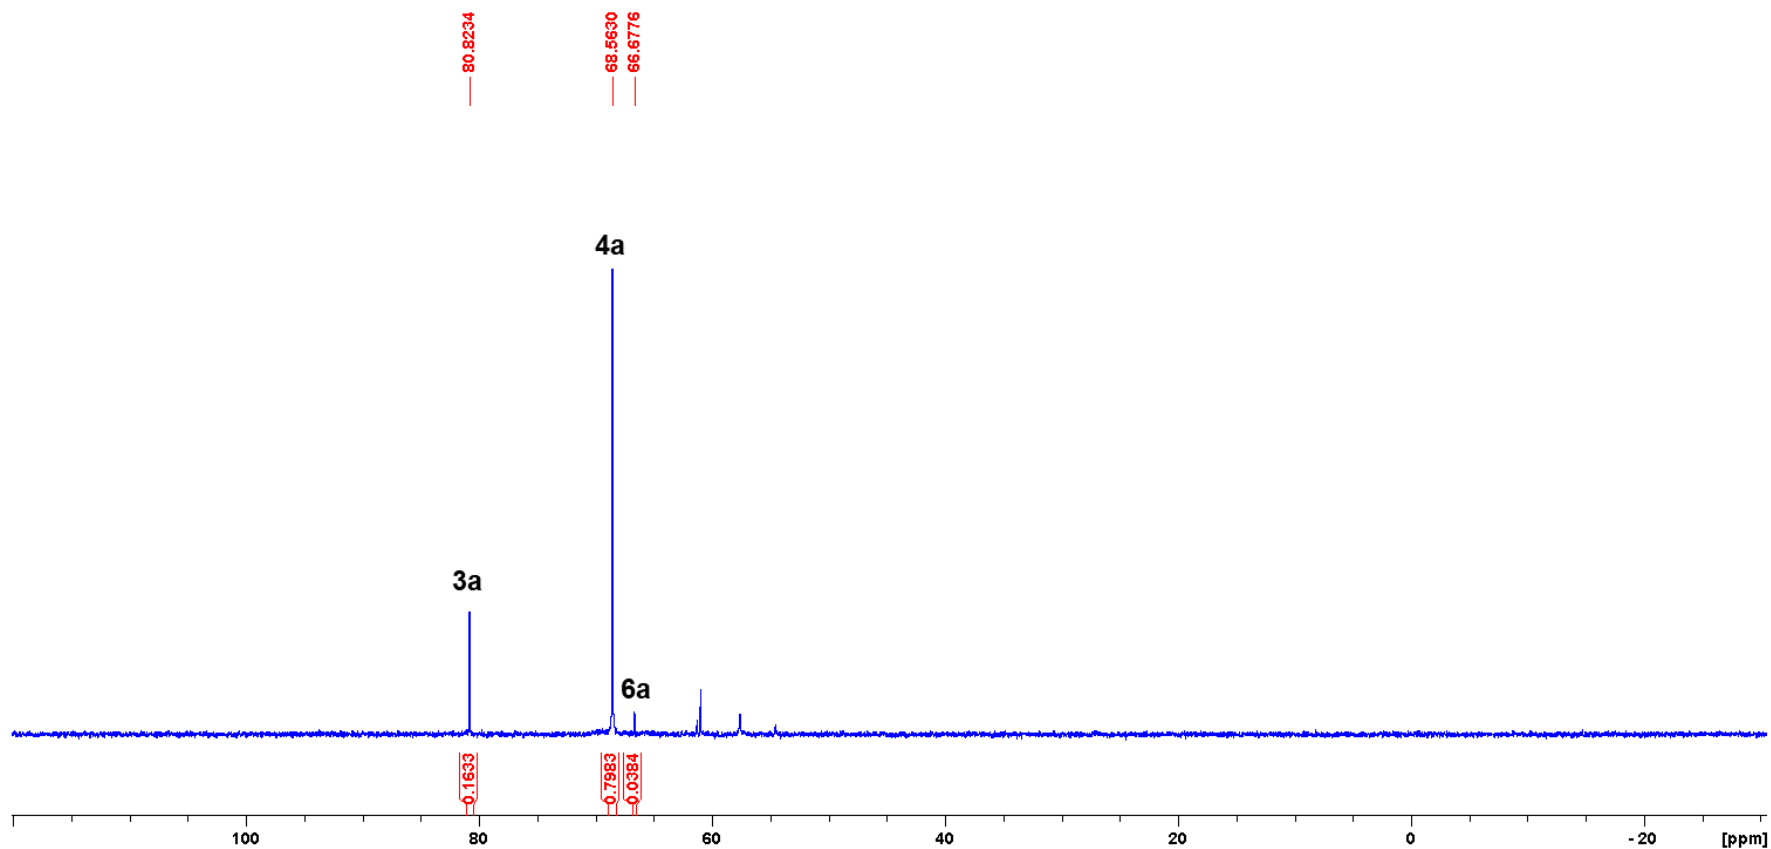

**Figure S10.**  $^{31}\text{P}\{^1\text{H}\}$  NMR spectrum of (**4a** · toluene) in  $\text{CD}_2\text{Cl}_2$ . In addition to the contamination with starting material **3a**, the spectrum contains the signal of decomposition product **6a** (and signals of other still unidentified decomposition products).

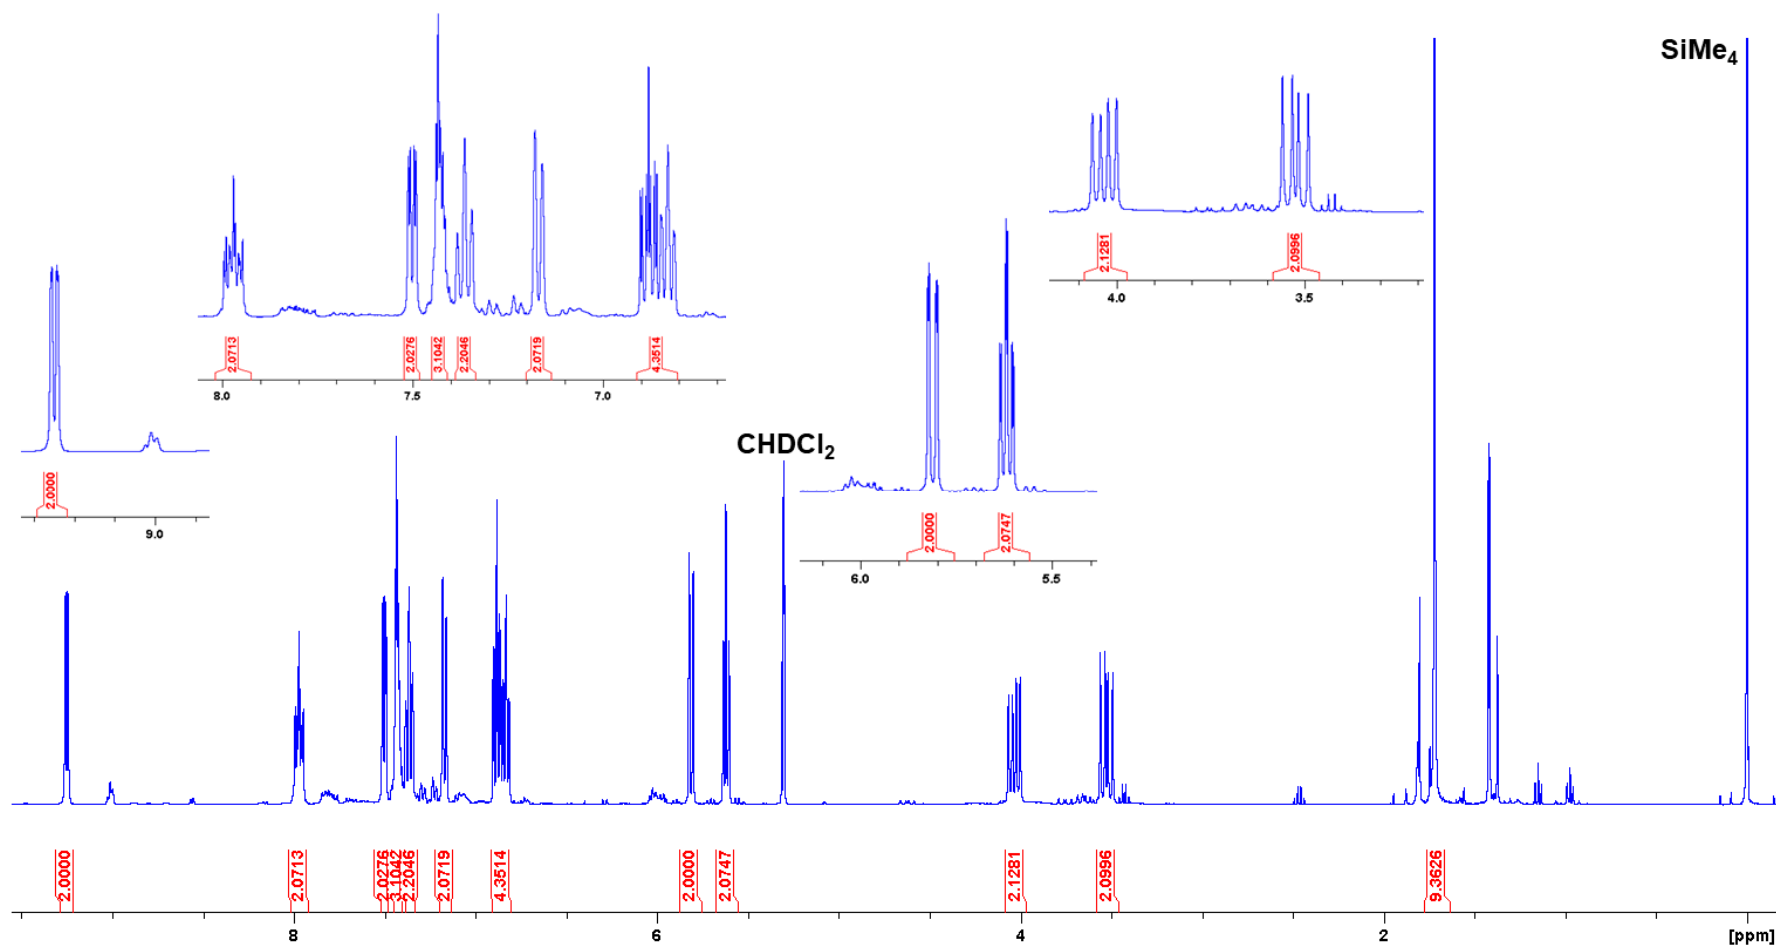

**Figure S11.**  $^1\text{H}$  NMR spectrum of **5a** in  $\text{CD}_2\text{Cl}_2$ , sample prepared *in situ* from **3a** and  $\text{CNtBu}$  (full spectrum and magnified insets of the aryl and  $\text{CH}_2$  proton signals).

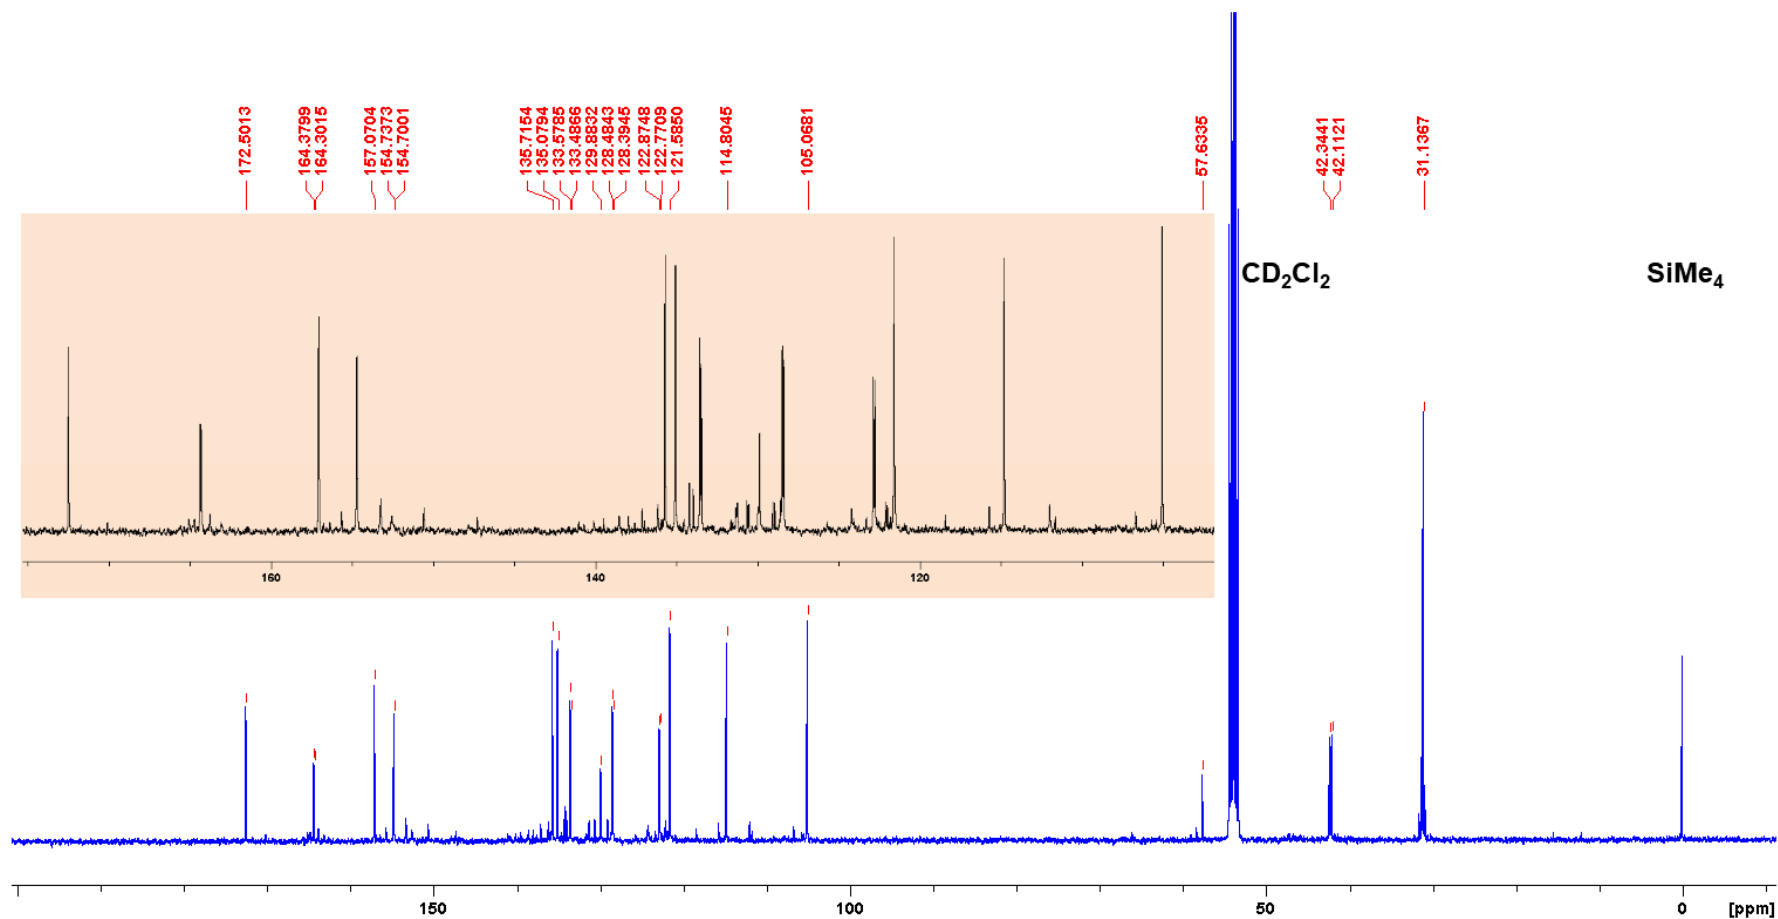

**Figure S12.**  $^{13}\text{C}\{^1\text{H}\}$  NMR spectrum of **5a** in  $\text{CD}_2\text{Cl}_2$ , sample prepared *in situ* from **3a** and  $\text{CN}t\text{Bu}$  (full spectrum and magnified inset of the aryl part of signals). The location of the  $\text{CNCMe}_3$  signal and of the Ph-ipso-C signal has not been identified.

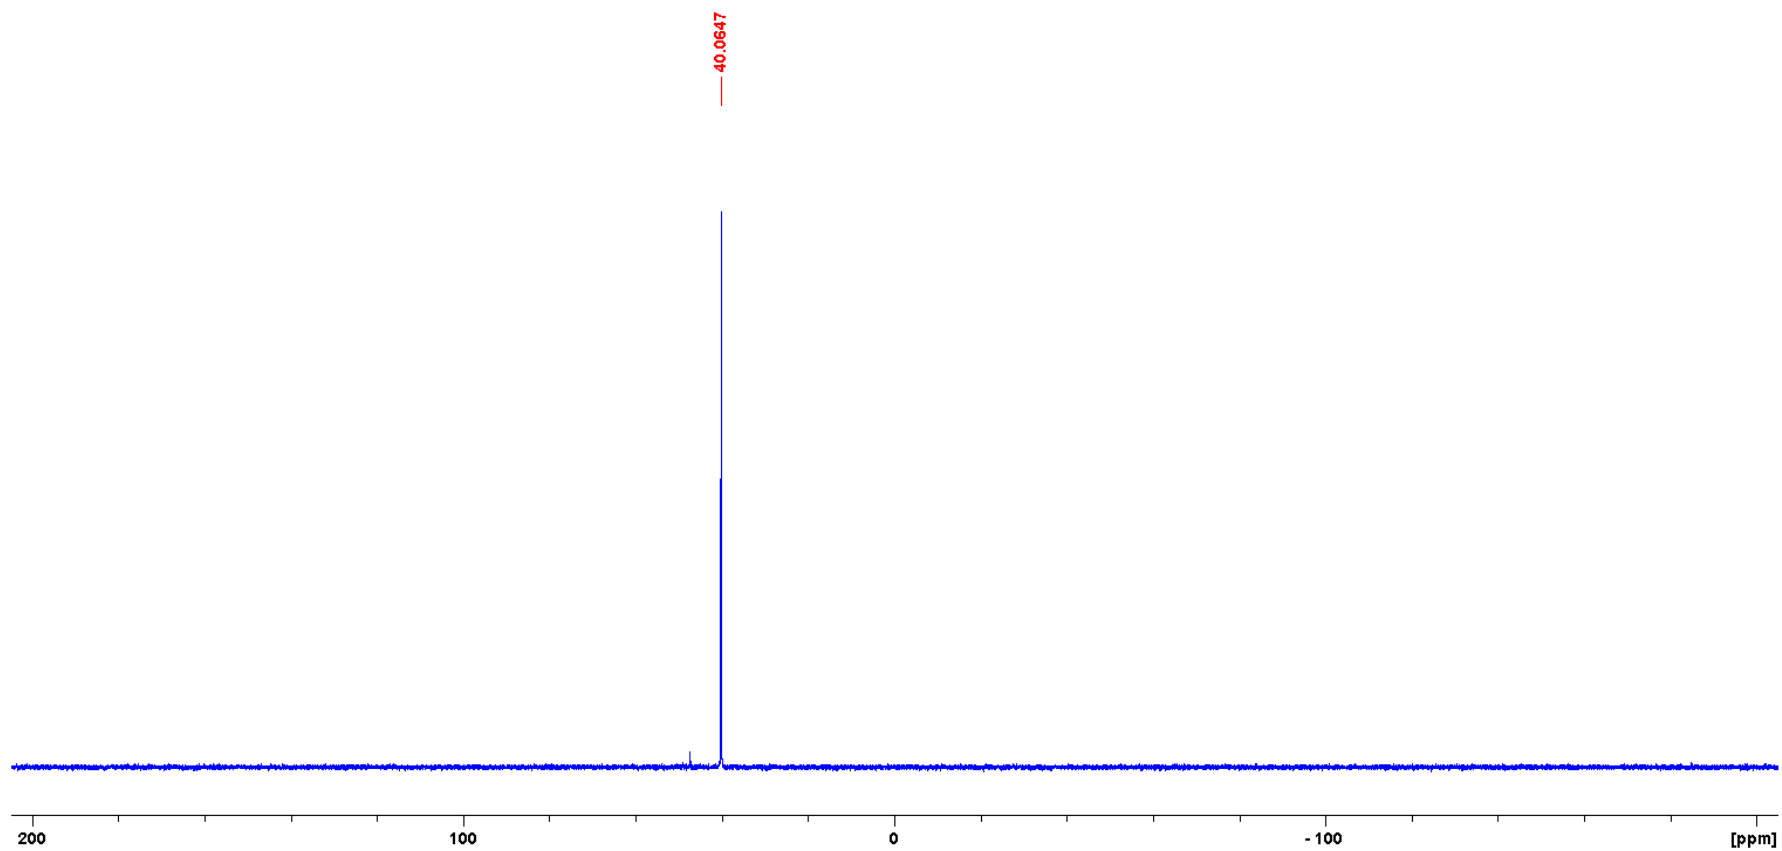

**Figure S13.**  $^{31}\text{P}\{^1\text{H}\}$  NMR spectrum of **5a** in  $\text{CD}_2\text{Cl}_2$ , sample prepared *in situ* from **3a** and  $\text{CN}t\text{Bu}$ .

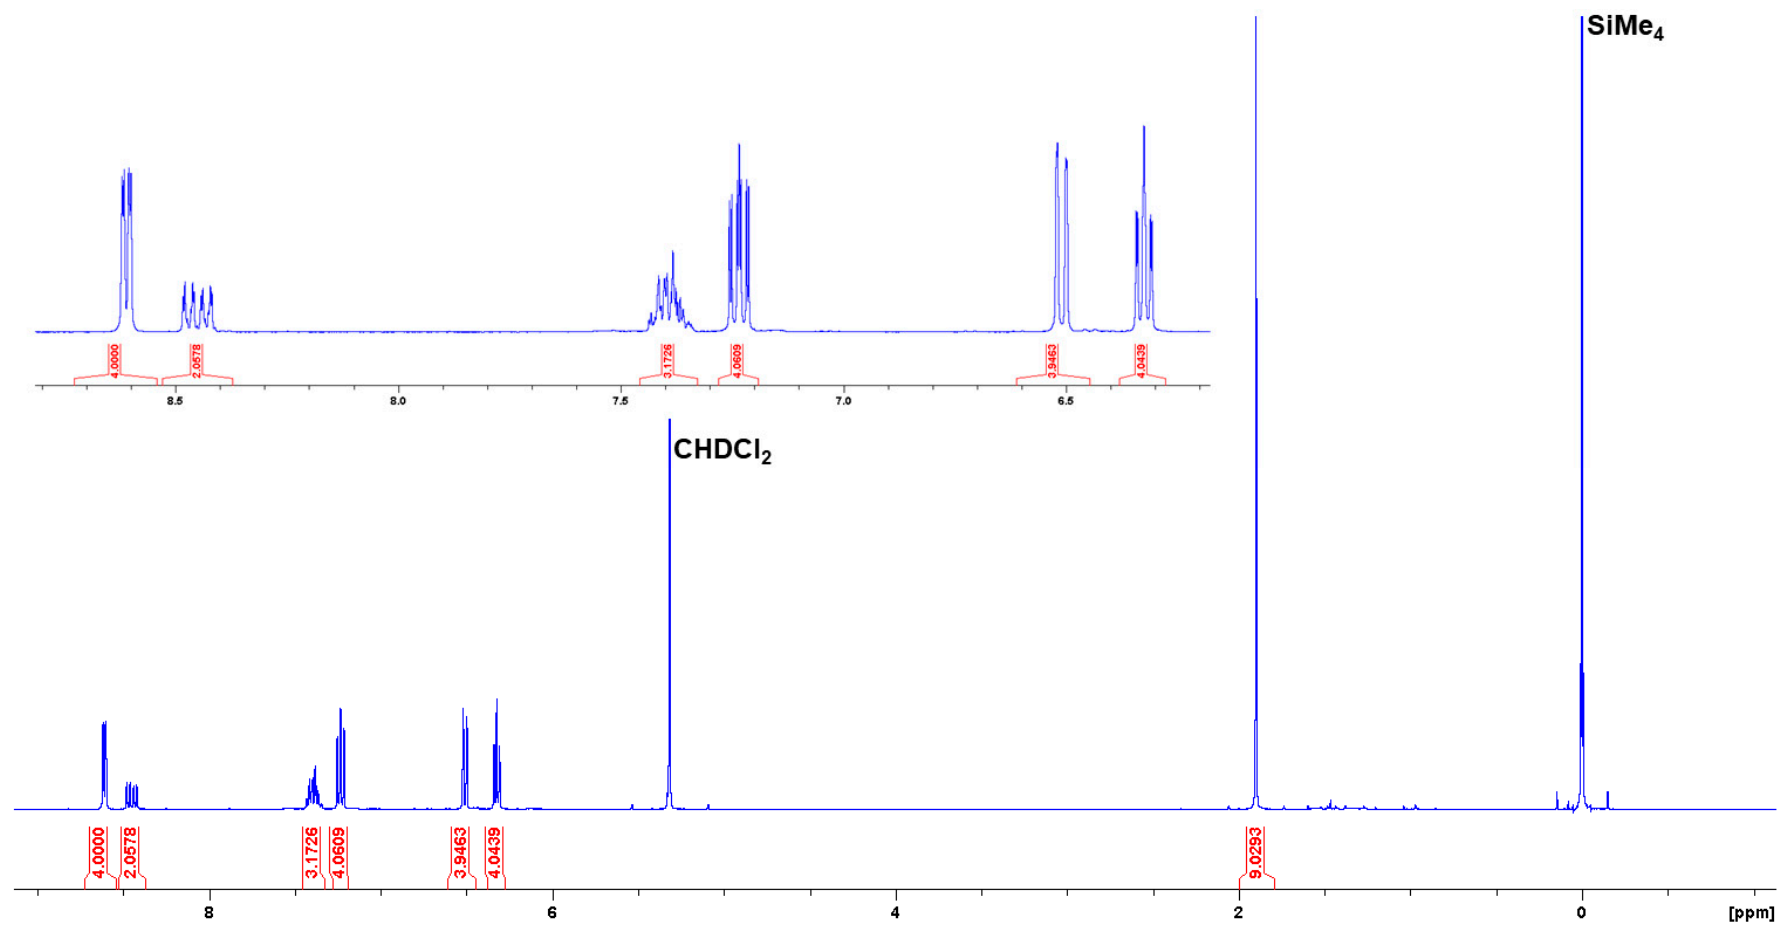

**Figure S14.** <sup>1</sup>H NMR spectrum of **5b** in CD<sub>2</sub>Cl<sub>2</sub> (full spectrum and magnified inset of the aryl proton signals).



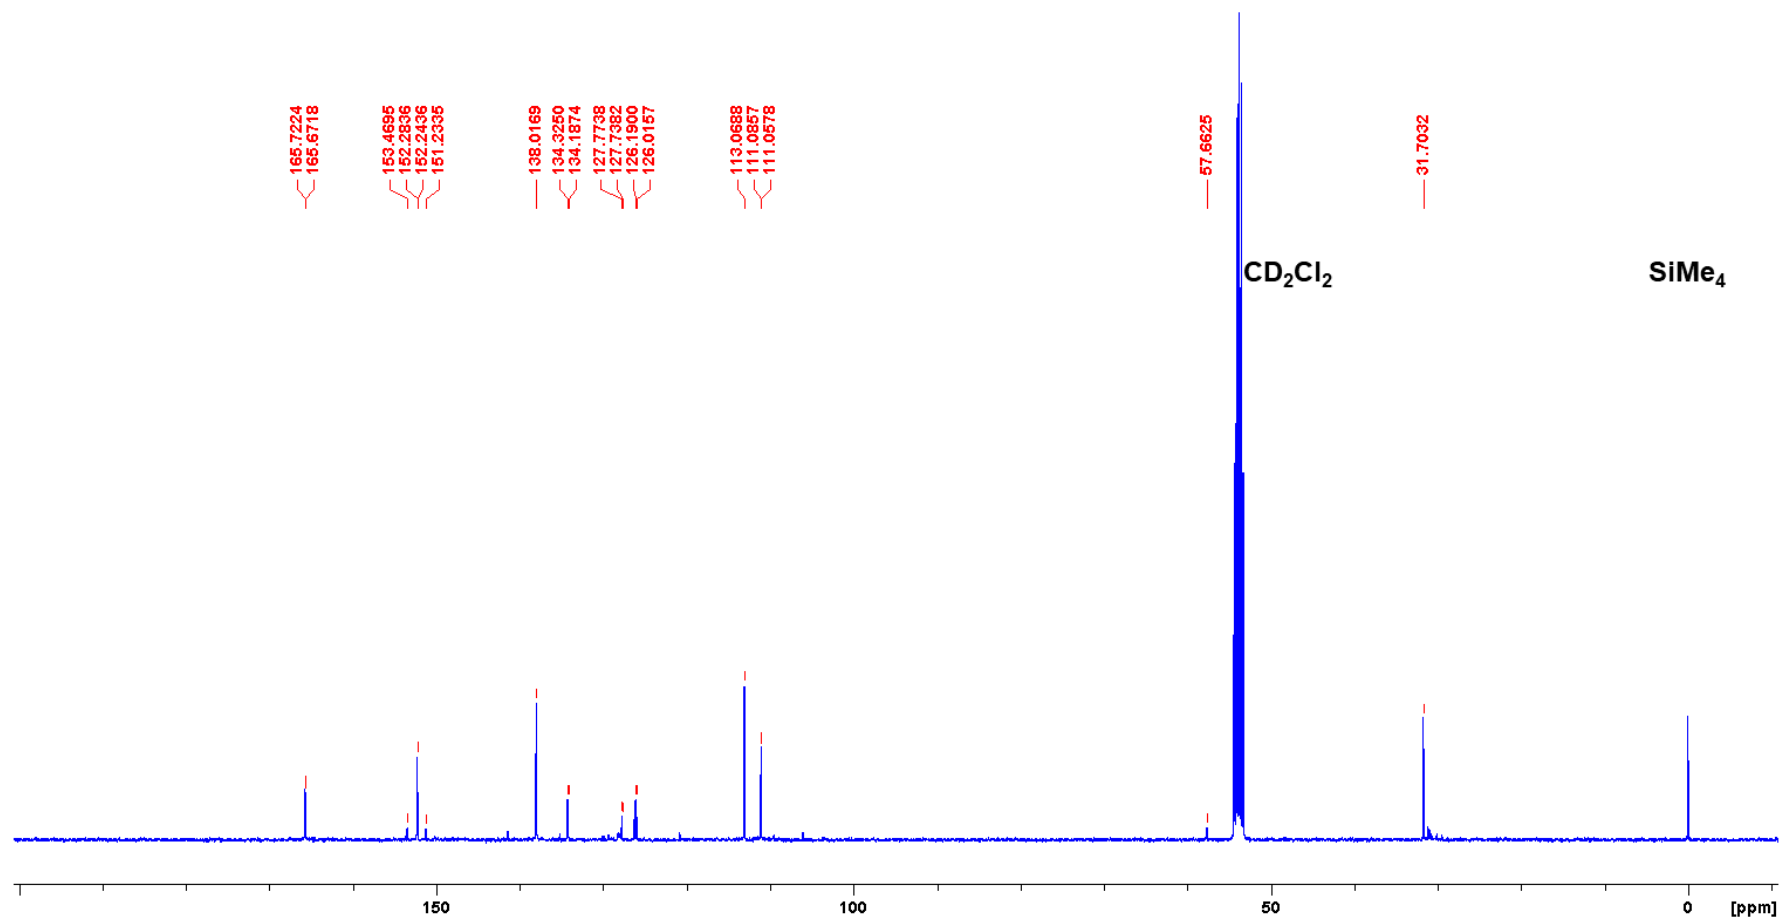

**Figure S15.** <sup>13</sup>C{<sup>1</sup>H} NMR spectrum of **5b** in CD<sub>2</sub>Cl<sub>2</sub>. The location of the CNCMe<sub>3</sub> signal has not been identified.

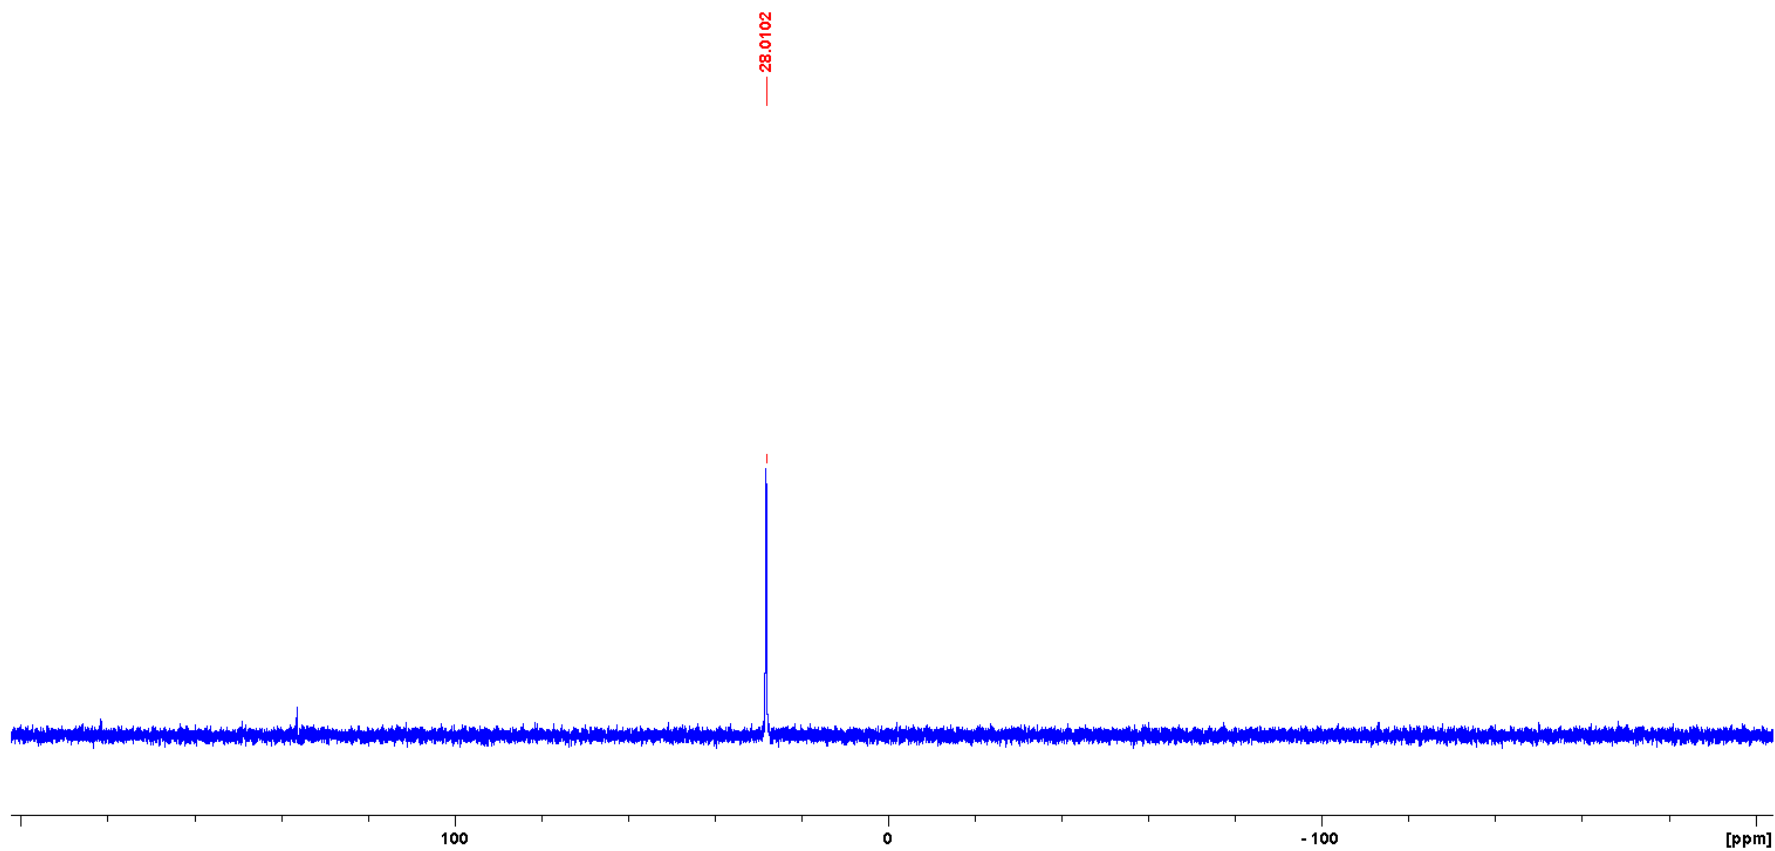

**Figure S16.**  $^{31}\text{P}\{^1\text{H}\}$  NMR spectrum of **5b** in  $\text{CD}_2\text{Cl}_2$ .

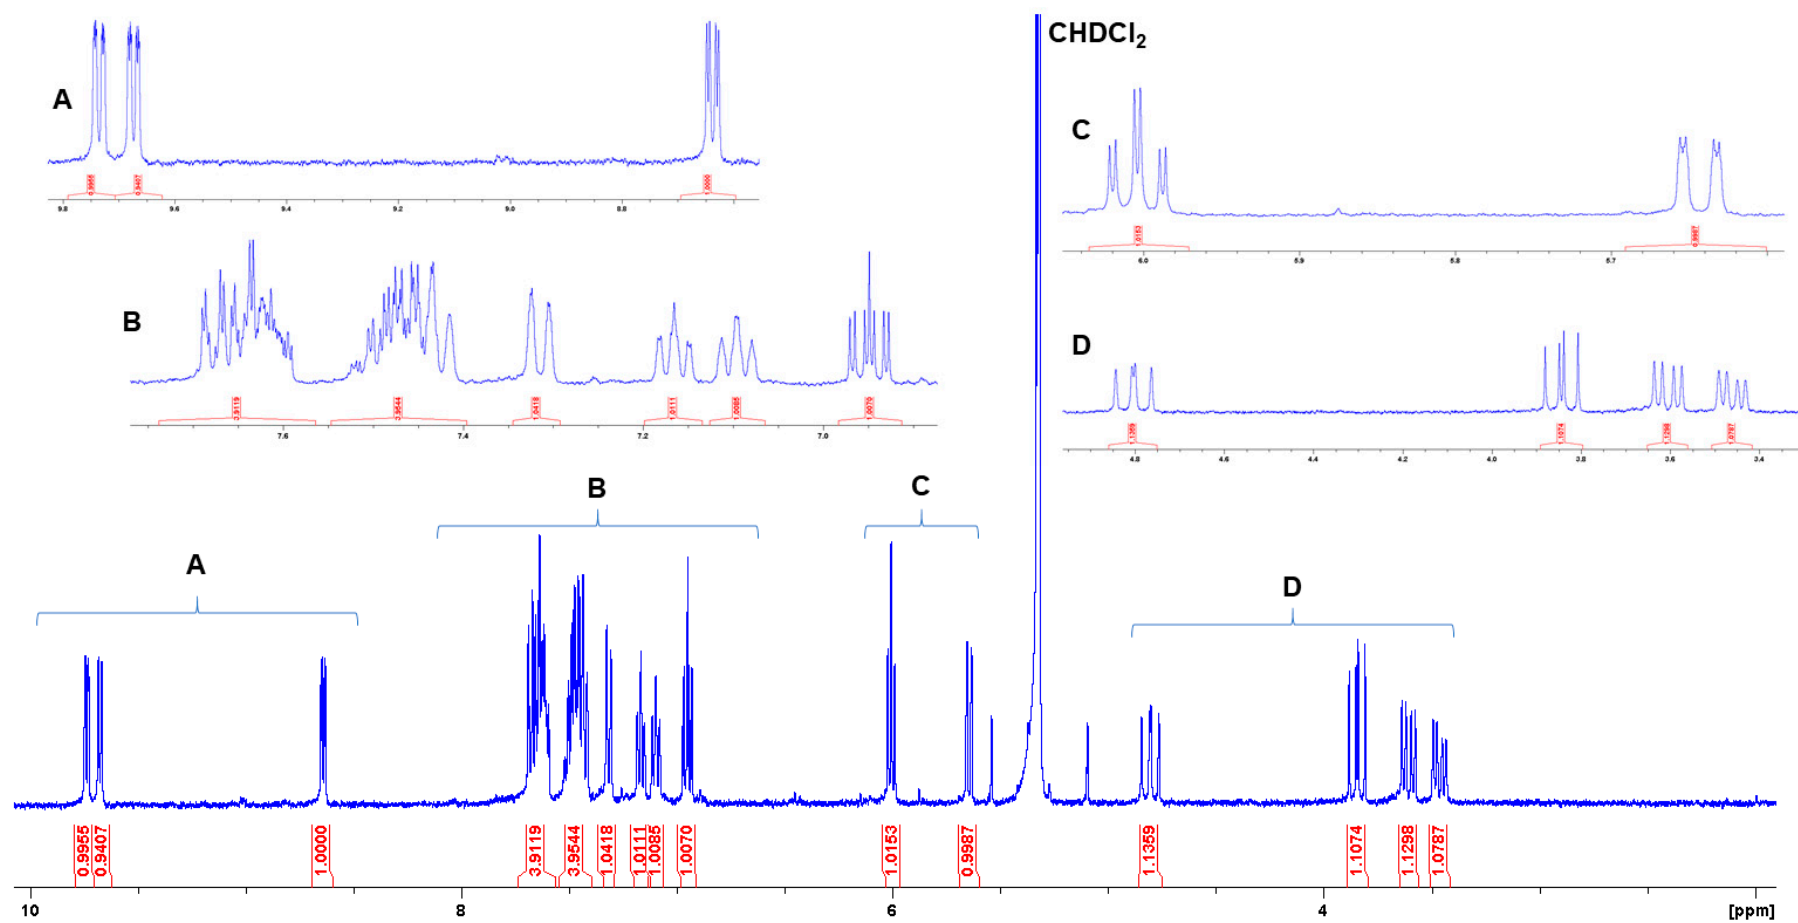

**Figure S17.**  $^1\text{H}$  NMR spectrum of **6a** in  $\text{CD}_2\text{Cl}_2$  (full spectrum and magnified insets of the (groups of) signals).

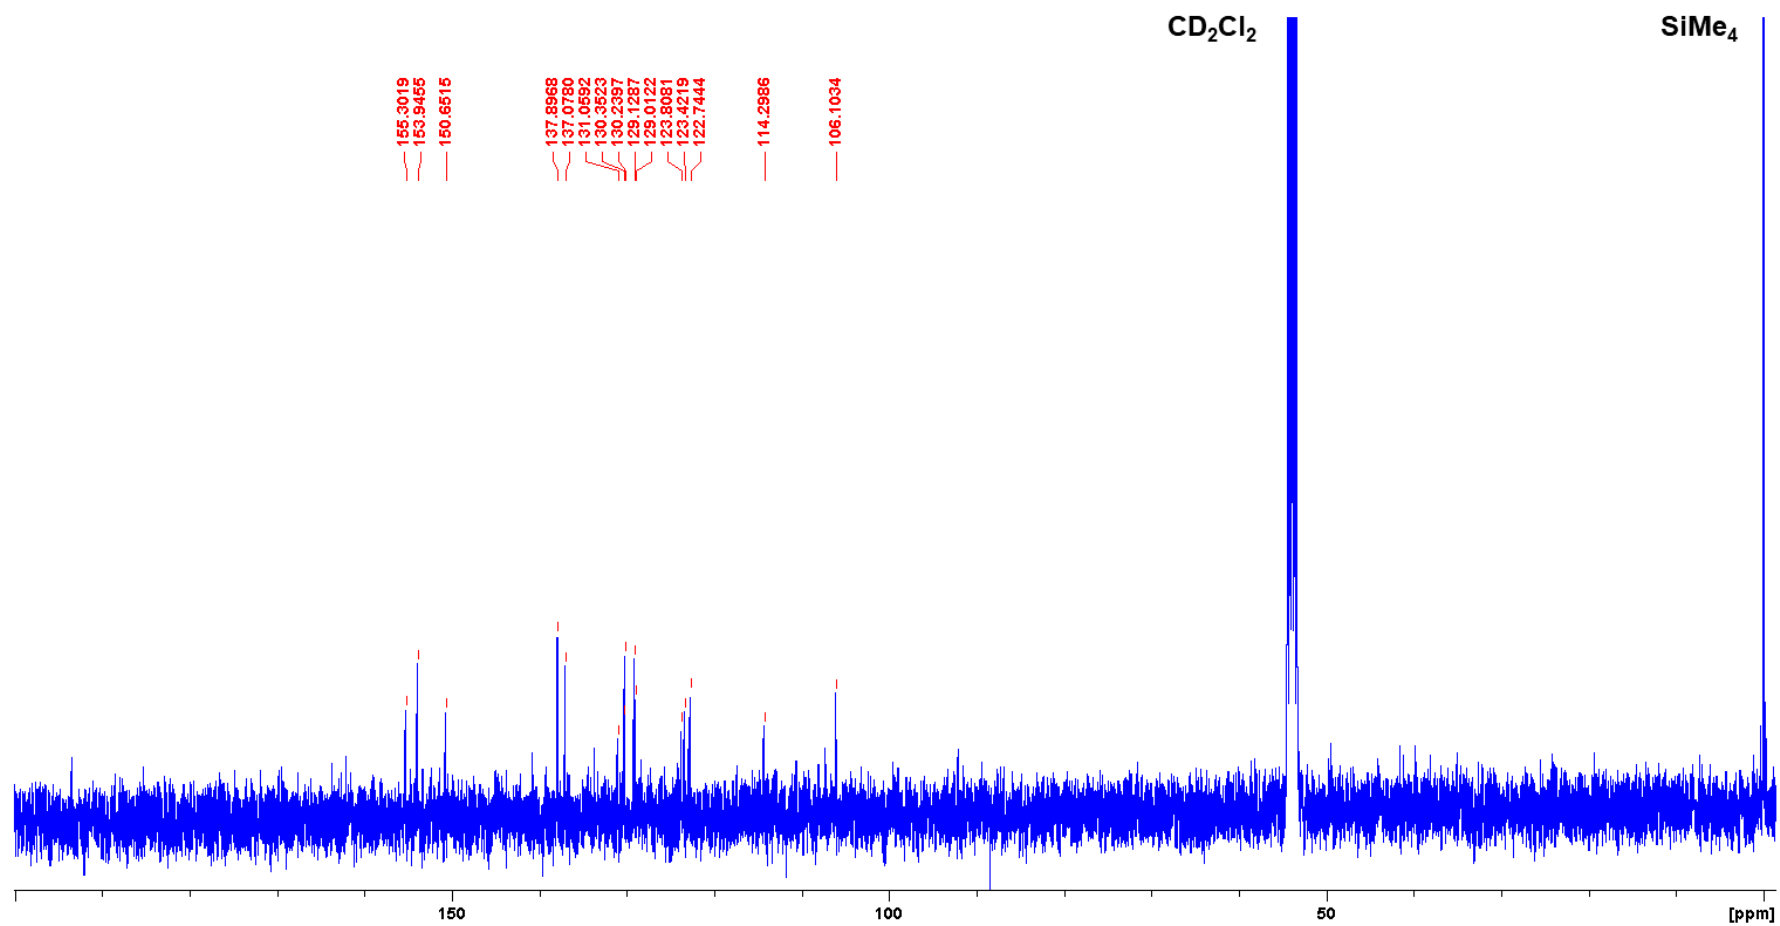

**Figure S18.**  $^{13}\text{C}\{^1\text{H}\}$  NMR spectrum of **6a** in  $\text{CD}_2\text{Cl}_2$ .

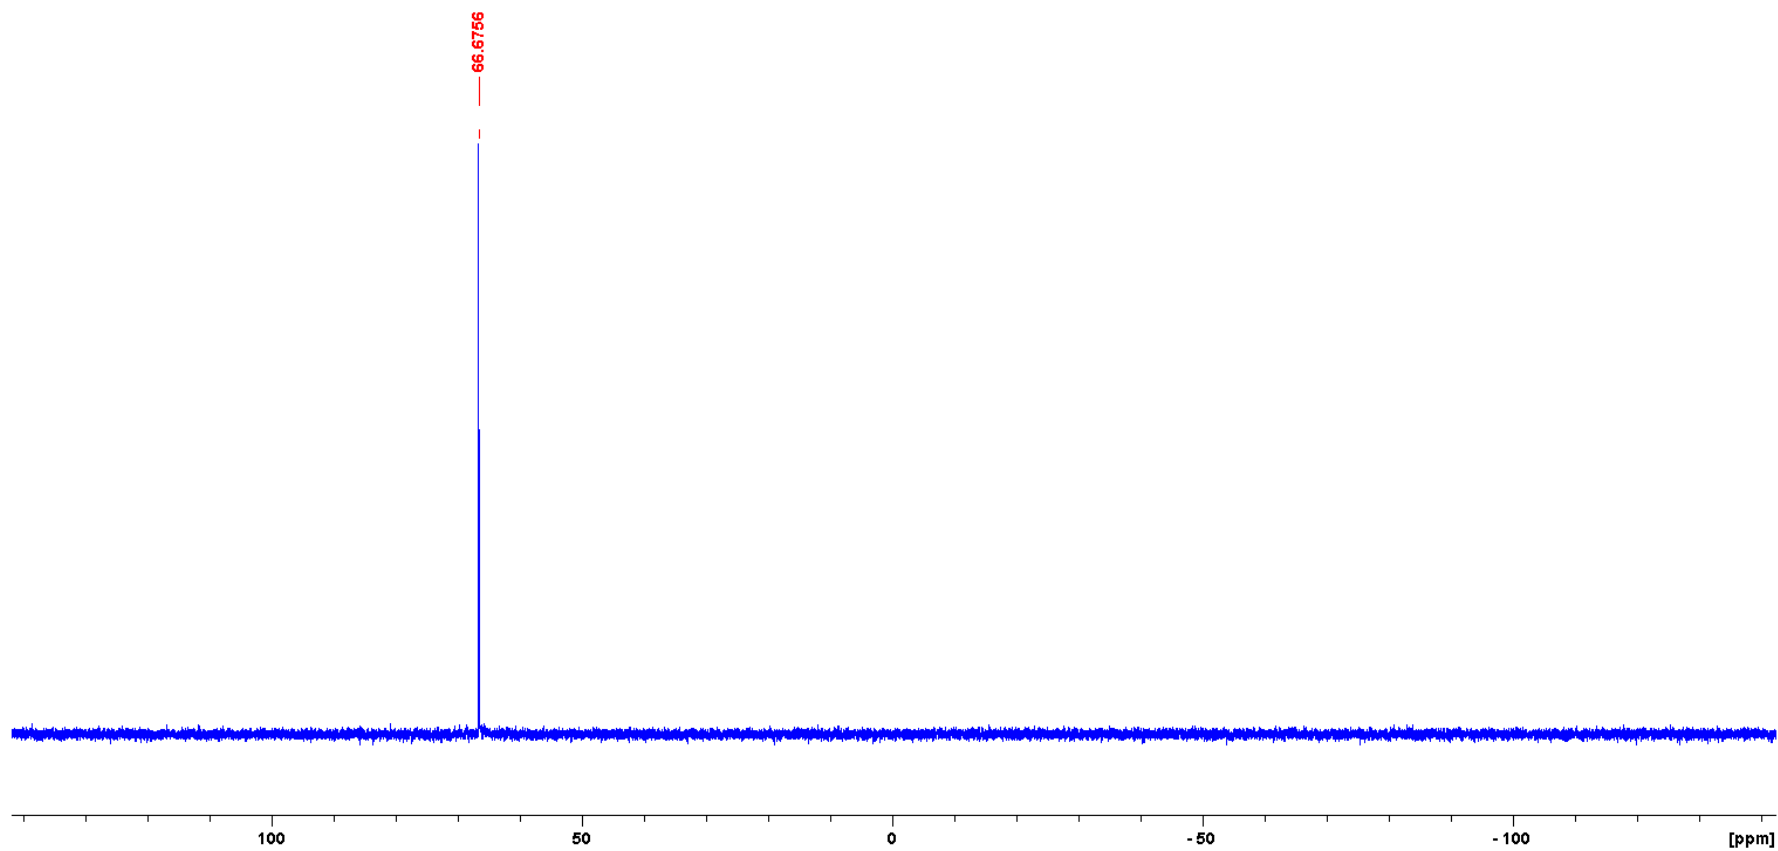

**Figure S19.**  $^{31}\text{P}\{^1\text{H}\}$  NMR spectrum of **6a** in  $\text{CD}_2\text{Cl}_2$ .

### Atomic coordinates and total energies:

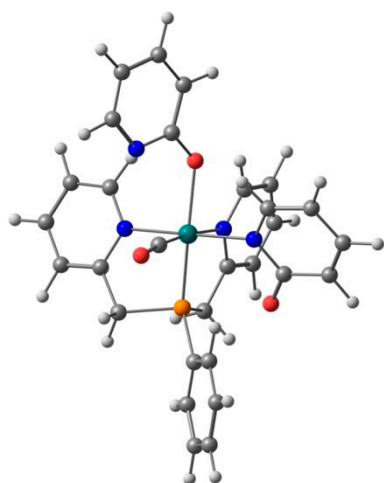

**Figure S20.** Optimized molecular structure of **4a<sup>1</sup>**.

PBE0:

final single point energy: -6486.191719155920 a.u.

final Gibbs free energy: -6485.76177128 a.u.

B2T-PLYP:

final single point energy: -6486.310311707651 a.u.

**Table S1.** Atomic coordinates for optimized structure of **4a<sup>1</sup>**.

|    |                   |                   |                   |
|----|-------------------|-------------------|-------------------|
| Ru | -0.02773736464471 | -0.00673784686152 | -0.02021576328089 |
| P  | -0.49610970402804 | -0.32214235073202 | -2.15919168984598 |
| N  | 2.06367414715394  | -0.73437943278406 | 2.39908723802237  |
| N  | -0.11968931530034 | 2.07138009787470  | -0.06060824920702 |
| N  | -0.16210750211666 | -2.11613148417693 | 0.02584984487839  |
| N  | -2.20247879444173 | 0.02063239742565  | 0.12008587980439  |
| O  | 2.89217633311975  | -0.00097402851669 | -0.62392060059277 |
| O  | -0.03796201814640 | 0.10986881531962  | 2.09404778767272  |
| O  | -1.45491412031034 | 2.03097612845957  | -1.91807438928506 |
| C  | 1.62744354795586  | 1.98338669499742  | -4.74128857961091 |
| C  | 3.05372940815865  | -1.03289238602413 | 3.23914885775050  |
| C  | 1.15668891730184  | 1.58382044255530  | -5.98445018987244 |
| C  | 3.00582269999925  | -0.83023794459394 | 4.60337535452885  |
| C  | 1.10644840797852  | 1.42171710831081  | -3.58676353066982 |
| C  | 1.78348109764484  | -0.01084012868604 | -0.32369095033027 |
| C  | 0.16560341852026  | 0.61677877117072  | -6.07257142904395 |
| C  | 1.83734052545134  | -0.27152878841472 | 5.12367037031212  |
| C  | 0.11607312084144  | 0.44933778635959  | -3.67114744385181 |
| C  | 0.12519579349579  | -2.05376209939462 | -2.38075605455660 |
| C  | 0.51948483115892  | 2.79507922836550  | 0.87373578892120  |
| C  | 0.94089367077246  | -0.19181683539707 | 2.88852575331884  |
| C  | 0.46923526700478  | 4.16276888502735  | 0.94547070630882  |

|   |                   |                   |                   |
|---|-------------------|-------------------|-------------------|
| C | -0.34970370867559 | 0.04562399504321  | -4.91871793101813 |
| C | 0.80400752153445  | 0.04928082273533  | 4.27801800091766  |
| C | -0.12465494980071 | -2.81873872309202 | -1.12437057983693 |
| C | -0.31700515605683 | -4.19313274780068 | -1.12570283985973 |
| C | -0.29835744918506 | 4.83608746845049  | -0.01310183505931 |
| C | -0.53835584126491 | -4.85864017139647 | 0.06616069817970  |
| C | -0.38335483186439 | -2.76040537643581 | 1.17603274516121  |
| C | -0.57174142132647 | -4.12582712210922 | 1.24061056862068  |
| C | -0.87268174162834 | 2.69822721305471  | -1.02925740244502 |
| C | -0.95292324211542 | 4.12301075373278  | -0.97668105721587 |
| C | -2.31287585365197 | -0.53492717234366 | -2.26824928904799 |
| C | -2.96567499913510 | -0.18400573780368 | -0.96590329257251 |
| C | -2.78539436304496 | 0.34409687959992  | 1.27854965570924  |
| C | -4.34824998273461 | -0.08001584946983 | -0.89299676147198 |
| C | -4.15283029584798 | 0.46928383835677  | 1.41533252579314  |
| C | -4.95152503714517 | 0.25055261470283  | 0.30532454702512  |
| H | 2.39724829080454  | 2.74197876086517  | -4.66914466611448 |
| H | 3.94195525304406  | -1.46314399862347 | 2.78264304648856  |
| H | 1.56062568111933  | 2.02879094500662  | -6.88583127593049 |
| H | 3.84410781389564  | -1.09369507063491 | 5.23429677261702  |
| H | 1.45670970047863  | 1.74771351592478  | -2.61525130572000 |
| H | 1.20463206018501  | -1.95431944431540 | -2.53805520984480 |
| H | 1.08953781245510  | 2.22230531158613  | 1.59248083182308  |
| H | 1.74360924908378  | -0.08656064038878 | 6.18833652609375  |
| H | -0.20661400942175 | 0.30538757626828  | -7.04121201223853 |
| H | 1.01078638456367  | 4.68527289443333  | 1.72123555519771  |
| H | -0.28620226820484 | -4.72783387841062 | -2.06597009430039 |
| H | -0.28422915795138 | -2.57185618271984 | -3.24954357744571 |
| H | -0.68565933389811 | -5.93155970049227 | 0.07667441335470  |
| H | -1.12153839775297 | -0.71234881614667 | -4.99648345507112 |
| H | -0.37054152612810 | 5.91829118312605  | 0.00466304089906  |
| H | -0.11478759515592 | 0.49117531740478  | 4.64259217763969  |
| H | -0.41543557717663 | -2.13676877532960 | 2.05732832611958  |
| H | -0.74521549425227 | -4.59527080630337 | 2.19933316849315  |
| H | -1.55120060478135 | 4.60575304136941  | -1.73830227602291 |
| H | -2.55194336864746 | -1.56821563911952 | -2.53536850114903 |
| H | -2.70437819672801 | 0.11344595595549  | -3.05153905857350 |
| H | -2.10196216868096 | 0.50068222683203  | 2.10372027938822  |
| H | -4.93718011962128 | -0.24709283489909 | -1.78546763046321 |
| H | -4.57357780423112 | 0.73817642720507  | 2.37475114950877  |
| H | -6.02892908662398 | 0.34266695989721  | 0.36918648600093  |

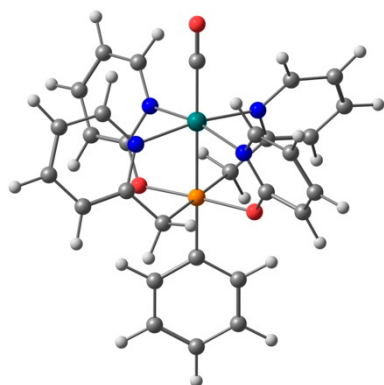

**Figure S21.** Optimized molecular structure of **4a<sup>2</sup>**.

PBE0:

final single point energy: -6486.139749933685 a.u.

final Gibbs free energy: -6485.70646114 a.u.

B2T-PLYP:

final single point energy: -6486.254919115781 a.u.

**Table S2.** Atomic coordinates for optimized structure of **4a<sup>2</sup>**.

|    |                   |                   |                   |
|----|-------------------|-------------------|-------------------|
| Ru | -0.00029551628752 | -0.00056381182322 | -0.01516193433960 |
| P  | -0.00303539454365 | 0.00112071114623  | -2.38940230901220 |
| C  | 0.00146357476217  | -0.00165477935627 | 1.88380255716843  |
| O  | 0.00184658312277  | -0.00202915778004 | 3.03851350699207  |
| O  | -1.73661600689301 | -0.70015463127037 | -2.43067358933372 |
| N  | -2.07468865784575 | -0.01428334068210 | -0.25666915360816 |
| N  | -0.20716647012891 | -2.08310663047519 | -0.19073126708820 |
| N  | 0.20652541080879  | 2.08220991217971  | -0.18833135727331 |
| N  | 2.07349532347212  | 0.01326249165590  | -0.26141224207047 |
| C  | -2.54539527130097 | -0.46236818224408 | -1.44663016481728 |
| C  | -3.92459674783431 | -0.66412789660858 | -1.63501354975354 |
| H  | -4.25301576912298 | -1.03414674406366 | -2.59643026718095 |
| C  | -4.80418515830377 | -0.37963794793247 | -0.62196843323256 |
| H  | -5.86737983001626 | -0.53115912239608 | -0.76573569156552 |
| C  | -4.31363814604352 | 0.11477273067917  | 0.58656615810550  |
| H  | -4.96752872442400 | 0.36422952771552  | 1.41041419102514  |
| C  | -2.95707795810178 | 0.27474812379470  | 0.71682194733690  |
| H  | -2.52682478698471 | 0.64529149778624  | 1.63700676379903  |
| C  | 0.10023005433164  | -2.67516140265148 | -1.36685067645787 |
| C  | -0.22977960931446 | -4.01539125085582 | -1.58433169836253 |
| H  | 0.02477242141114  | -4.46041420529271 | -2.53720624564984 |
| C  | -0.85779521030678 | -4.75169902024261 | -0.60460502047122 |
| H  | -1.10982696716758 | -5.79185797983041 | -0.77278744060191 |
| C  | -1.15604487224636 | -4.13295719129751 | 0.60299830463940  |
| H  | -1.65005052616411 | -4.65834273306804 | 1.40888949812577  |
| C  | -0.81417206609385 | -2.80942358683538 | 0.76032743556730  |
| H  | -1.04151666120771 | -2.28901492567866 | 1.68000631007428  |
| C  | -0.74331949554577 | 1.85798831340421  | -2.39141997159903 |
| H  | -0.71558512747331 | 2.36178524460002  | -3.35598304424378 |
| H  | -1.79076296306941 | 1.69310032877842  | -2.13808881065318 |



|   |                   |                   |                   |
|---|-------------------|-------------------|-------------------|
| C | -0.10364595566320 | 2.67597174295854  | -1.36287358768553 |
| C | 0.22650326829690  | 4.01633050612471  | -1.57943288942788 |
| H | -0.03030680155892 | 4.46274727120786  | -2.53104870334900 |
| C | 0.85745379887288  | 4.75100214144869  | -0.60037518145847 |
| H | 1.10959771595654  | 5.79125006293345  | -0.76783973418370 |
| C | 1.15851285418811  | 4.13051854508463  | 0.60564737895779  |
| H | 1.65488565684945  | 4.65458412013371  | 1.41094269839539  |
| C | 0.81635039748493  | 2.80696198264006  | 0.76211538017716  |
| H | 1.04581162421169  | 2.28521773648107  | 1.68051379666825  |
| C | 2.54150685658787  | 0.46296296792462  | -1.45181742434897 |
| C | 3.92031439208968  | 0.66463563719463  | -1.64315071797769 |
| H | 4.24658146763991  | 1.03596832767079  | -2.60479336508746 |
| C | 4.80220155521247  | 0.37843952405207  | -0.63258386056771 |
| H | 5.86509709227994  | 0.52988122659629  | -0.77862971722848 |
| C | 4.31436776341166  | -0.11758354247791 | 0.57639010843960  |
| H | 4.97013301035245  | -0.36839659952224 | 1.39833432065721  |
| C | 2.95807597159398  | -0.27739237186888 | 0.70960235043738  |
| H | 2.52983639201548  | -0.64912347648645 | 1.63024905790839  |
| C | -0.00521727712879 | 0.00268006684817  | -4.27084430396039 |
| C | -0.72669790439288 | -0.94628052010932 | -4.99151934792266 |
| H | -1.29795385381951 | -1.69702518164280 | -4.46259409113418 |
| C | -0.73484744574259 | -0.94418252301126 | -6.37933706010299 |
| H | -1.31219734619456 | -1.69141916420681 | -6.91212856201341 |
| C | -0.00851113315920 | 0.00511358510178  | -7.08236026834777 |
| H | -0.00977917904656 | 0.00605225021736  | -8.16603143821630 |
| C | 0.71947077841804  | 0.95319694170801  | -6.37939495145247 |
| H | 1.29556951589067  | 1.70135731471227  | -6.91224449089080 |
| C | 0.71457205184725  | 0.95289167931910  | -4.99156611780429 |
| H | 1.28702609426355  | 1.70274434404272  | -4.46267255041739 |
| C | 0.73697001525277  | -1.85556392443785 | -2.39602457732196 |
| H | 1.78523633344681  | -1.69142016782449 | -2.14557043334964 |
| H | 0.70633167782022  | -2.35797091875073 | -3.36123076032281 |
| O | 1.73045485123480  | 0.70239164658274  | -2.43359967258817 |

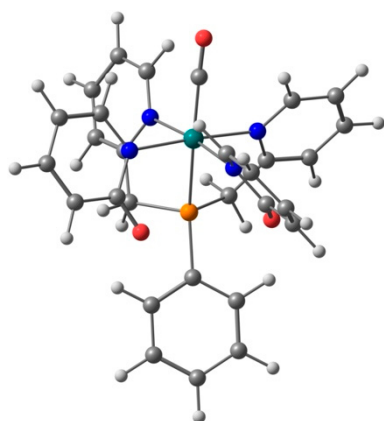

**Figure S22.** Optimized molecular structure of **4a<sup>3</sup>**.

PBE0:

final single point energy: -6486.169901841126 a.u.

final Gibbs free energy: -6485.73860629 a.u.

B2T-PLYP:

final single point energy: -6486.285439713944 a.u.

**Table S3.** Atomic coordinates for optimized structure of **4a<sup>3</sup>**.

|    |                   |                   |                   |
|----|-------------------|-------------------|-------------------|
| Ru | -0.10435741886510 | 0.02314191180024  | -0.05057292322127 |
| P  | -0.47426587043174 | -0.02309523426012 | -2.38004872379095 |
| C  | 0.01421183171772  | 0.25396774907614  | 1.79125182107191  |
| O  | 0.08404497615634  | 0.44049582017047  | 2.92440768878690  |
| N  | -2.22752234693958 | 0.05003750037013  | -0.09069546310827 |
| N  | -0.21266795081481 | -2.06342910694262 | 0.17288325652206  |
| N  | -0.00310132835470 | 2.10834812125085  | -0.40497755886050 |
| N  | 1.95917128054733  | -0.08868979488429 | -0.24351231818637 |
| C  | -2.88909427857296 | -0.42094566096144 | -1.16968350457040 |
| C  | -4.27842570179286 | -0.42837329406576 | -1.21002973401633 |
| H  | -4.77079043544110 | -0.80983605407163 | -2.09485154920144 |
| C  | -5.00946926876273 | 0.04148637035944  | -0.13712249900910 |
| H  | -6.09206176297681 | 0.03337036460485  | -0.16101393656350 |
| C  | -4.32378150943830 | 0.52828051084021  | 0.96372220367150  |
| H  | -4.83935959379593 | 0.91769027038015  | 1.83101441798035  |
| C  | -2.94609697192786 | 0.51575184347398  | 0.94173972996001  |
| H  | -2.38291162601683 | 0.89811288244918  | 1.78064496607312  |
| C  | 0.25684036855744  | -2.89110756231024 | -0.83112429546888 |
| C  | 0.26295800222643  | -4.30193661740469 | -0.57253549945334 |
| H  | 0.67648655207066  | -4.93032729680307 | -1.35061770720790 |
| C  | -0.24315933020098 | -4.82122811704763 | 0.58089863927799  |
| H  | -0.23615943086137 | -5.89309518192993 | 0.74749468255587  |
| C  | -0.77658348011822 | -3.95522973123799 | 1.54726732434629  |
| H  | -1.20258416167328 | -4.31488840327211 | 2.47324977598159  |
| C  | -0.72752751429762 | -2.61185677605190 | 1.29118234968816  |
| H  | -1.12184581287465 | -1.91588045529770 | 2.02041208699125  |
| C  | -1.04894070293210 | 1.72637780834593  | -2.58006785556517 |

|   |                   |                   |                   |
|---|-------------------|-------------------|-------------------|
| H | -0.86352209768448 | 2.10469904521715  | -3.58430850655923 |
| H | -2.13422961684556 | 1.73115549586993  | -2.44041450039091 |
| C | -0.42618506811966 | 2.63060278698291  | -1.57192445798124 |
| C | -0.28741788437575 | 3.98461328237075  | -1.84452673940959 |
| H | -0.63914320236833 | 4.36313222933153  | -2.79537161843247 |
| C | 0.30984819943348  | 4.82297237585620  | -0.92415756989966 |
| H | 0.43074668431919  | 5.87829779975985  | -1.13486370087226 |
| C | 0.76157737418012  | 4.27609744842557  | 0.26423067216511  |
| H | 1.25302907447839  | 4.87464094158200  | 1.01906821512950  |
| C | 0.58483915717772  | 2.92561166673298  | 0.47822328732516  |
| H | 0.94541824210527  | 2.46935340606209  | 1.38810690595980  |
| C | 2.56408154419412  | 0.51663486727788  | -1.32531522834021 |
| C | 3.98697895143831  | 0.41277438647052  | -1.42137919771433 |
| H | 4.45220756601551  | 0.90798968791386  | -2.26363486576995 |
| C | 4.71439438699145  | -0.29646334035795 | -0.51087221664963 |
| H | 5.79173883183704  | -0.37052219552503 | -0.61301938257419 |
| C | 4.05788427529921  | -0.93374047228798 | 0.55041338908434  |
| H | 4.58741105220121  | -1.51798809367401 | 1.28958864791299  |
| C | 2.69819982241320  | -0.79431856816822 | 0.63043999795803  |
| H | 2.14697704485926  | -1.27417433844867 | 1.42912326845004  |
| C | 0.15098822904603  | -0.45600175028125 | -4.03123557578481 |
| C | -0.14455825940962 | -1.69499900366099 | -4.59444700352297 |
| H | -0.66704284375263 | -2.44277294152181 | -4.01617824628841 |
| C | 0.26510996495092  | -1.99653483790930 | -5.88385315527261 |
| H | 0.03109996651373  | -2.96721871952857 | -6.30453817798318 |
| C | 0.97814997784795  | -1.06750987910251 | -6.62638302457299 |
| H | 1.30150325611641  | -1.30588893235634 | -7.63273629342808 |
| C | 1.28273717951900  | 0.16524058036168  | -6.06832731798547 |
| H | 1.85044776314082  | 0.89428434049695  | -6.63424325078959 |
| C | 0.87347497579005  | 0.47043138675718  | -4.77974563045421 |
| H | 1.14950009134889  | 1.41771730083846  | -4.33996044806519 |
| O | 1.88663455122430  | 1.12678781846790  | -2.18331338157443 |
| O | 0.63583846090496  | -2.42092624048850 | -1.92037019991800 |
| C | -2.09564108769559 | -0.90729190797108 | -2.33350479225705 |
| H | -1.84723285038267 | -1.96224165043761 | -2.19197796521016 |
| H | -2.67272351689866 | -0.81866120163596 | -3.25507396096758 |

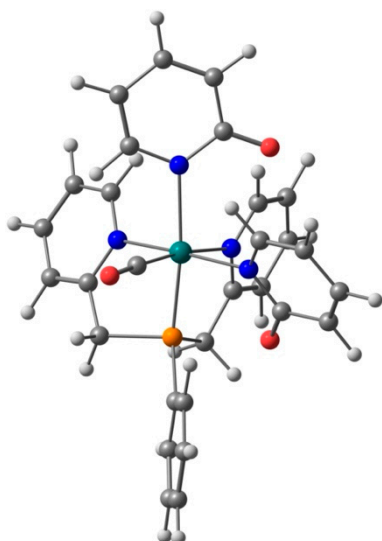

**Figure S23.** Optimized molecular structure of **4a<sup>4</sup>**.

PBE0:

final single point energy: -6486.183160077908 a.u.

final Gibbs free energy: -6485.75173398 a.u.

B2T-PLYP:

final single point energy: -6486.299848145378 a.u.

**Table S4.** Atomic coordinates for optimized structure of **4a<sup>4</sup>**.

|    |                   |                   |                   |
|----|-------------------|-------------------|-------------------|
| Ru | -0.00259664499323 | -0.05088962221398 | -0.03864104523077 |
| P  | -0.00565755267723 | -0.42931795723310 | -2.23456221335483 |
| N  | 0.08730097086876  | 2.01646276749678  | -0.25398370694101 |
| N  | -0.32910674438226 | -2.15466132224562 | 0.00896712436334  |
| N  | -2.18930163535003 | -0.04331714551207 | -0.42275990861071 |
| O  | 2.96567924864886  | -0.16273908971811 | 0.02433859576376  |
| O  | -0.92754637888334 | 1.85221378041390  | -2.29653384502409 |
| C  | 2.77936582535437  | 1.68063906562923  | -4.30810648231591 |
| C  | 2.57824632678882  | 1.26538764690103  | -5.61716481672993 |
| C  | 1.98196859338154  | 1.18351694735331  | -3.28985561236279 |
| C  | 1.81583240281681  | -0.12707438559101 | 0.02845360236458  |
| C  | 1.57936957962588  | 0.34709330786759  | -5.90703812586251 |
| C  | 0.98181360153172  | 0.26037780261312  | -3.57638237905952 |
| C  | 0.63055744870107  | -2.17680719004519 | -2.21474143906646 |
| C  | 0.65848739025048  | 2.79399009521852  | 0.68000853192615  |
| C  | 0.74317678224497  | 4.15765632798272  | 0.58738775741315  |
| C  | 0.78637673257597  | -0.15983451267520 | -4.88860761432910 |
| C  | -0.02314114794257 | -2.88918614780794 | -1.08125847094079 |
| C  | -0.35483045167581 | -4.23514013102254 | -1.14919406518248 |
| C  | 0.18716993942962  | 4.76895913225493  | -0.54163923796550 |
| C  | -1.01263876875823 | -4.83816678150241 | -0.09280141091172 |
| C  | -0.98307237029205 | -2.73725455509858 | 1.02022871274762  |
| C  | -1.33995232002862 | -4.07006311505248 | 1.01163332250012  |
| C  | -0.43924383716662 | 2.57898132218531  | -1.39185731410824 |
| C  | -0.39297953938641 | 3.99823863529593  | -1.50924200185973 |

|   |                   |                   |                   |
|---|-------------------|-------------------|-------------------|
| C | -1.73233510271846 | -0.66531051837944 | -2.76674525982520 |
| C | -2.67170746381885 | -0.38410787350729 | -1.63203061377556 |
| C | -3.05683224938860 | 0.23188821698685  | 0.55905906982077  |
| C | -4.03732631613105 | -0.47802445585457 | -1.86096084100297 |
| C | -4.42640347288269 | 0.15852650182188  | 0.39336618559330  |
| C | -4.92972183099633 | -0.21033179692543 | -0.84063782493558 |
| H | 3.55375836371114  | 2.40241160871095  | -4.07879162676530 |
| H | 3.19821169373150  | 1.66051861580612  | -6.41283543611210 |
| H | 2.12405612523910  | 1.52752604238289  | -2.27297071126909 |
| H | 1.70822052250463  | -2.09492419760987 | -2.03980428204948 |
| H | 1.06034826896942  | 2.27307539854957  | 1.53762069569309  |
| H | 1.41670711356683  | 0.02385376549585  | -6.92821797327725 |
| H | 1.21479337545126  | 4.72506460640481  | 1.37692457389605  |
| H | -0.09603541787512 | -4.79552021189602 | -2.03789451665027 |
| H | 0.48912097806370  | -2.71563881518754 | -3.15289463978940 |
| H | -1.27524896460637 | -5.88794359442531 | -0.13666849989606 |
| H | 0.00956312049813  | -0.87910282159166 | -5.12367831932875 |
| H | 0.21994472720436  | 5.84733972189412  | -0.65310200571498 |
| H | -1.22737135389706 | -2.09487781227915 | 1.85412056734956  |
| H | -1.86933571954732 | -4.48565755654479 | 1.85811344552039  |
| H | -0.82563373005678 | 4.42874314184018  | -2.40261262881770 |
| H | -1.88794082914442 | -1.68144089025177 | -3.13768144758171 |
| H | -1.94320970585581 | 0.02846465152176  | -3.58057238065456 |
| H | -2.61451738050761 | 0.58129927464627  | 1.48485190158462  |
| H | -4.38582182920617 | -0.75302807755389 | -2.84820856223096 |
| H | -5.07430568034684 | 0.40028064978010  | 1.22506085906076  |
| H | -5.99724908379776 | -0.27819090571691 | -1.01203696314199 |
| C | 0.81042145023551  | -0.86711441738312 | 2.77840057307348  |
| C | -0.70483966349110 | 0.92325501755350  | 2.97537447088624  |
| C | 1.04205193378568  | -0.95046049248931 | 4.12361264263981  |
| H | 1.32145340438244  | -1.55119757861177 | 2.11073830369664  |
| C | -0.48328376545735 | 0.86312620430725  | 4.39592214088304  |
| C | 0.36393280624729  | -0.04356218404441 | 4.95475238443064  |
| H | 1.73329606913227  | -1.68528036112510 | 4.51195922901631  |
| H | -1.02683696094193 | 1.58319922380762  | 4.99422457137340  |
| H | 0.51504780722933  | -0.06345749844655 | 6.02893702217914  |
| O | -1.47901781787073 | 1.75631682972420  | 2.47124704872026  |
| N | -0.02413850309670 | 0.01230086709583  | 2.18506571517886  |

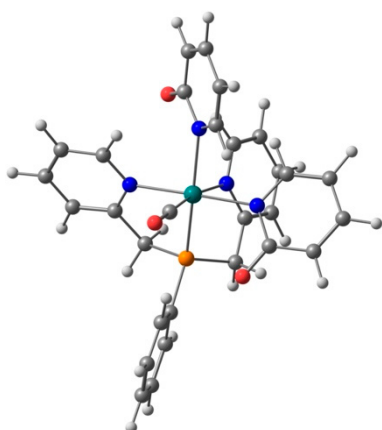

**Figure S24.** Optimized molecular structure of **4a<sup>5</sup>**.

PBE0:

final single point energy: -6486.182564613791 a.u.

final Gibbs free energy: -6485.75104808 a.u.

B2T-PLYP:

final single point energy: -6486.298785766808 a.u.

**Table S5.** Atomic coordinates for optimized structure of **4a<sup>5</sup>**.

|    |                   |                   |                   |
|----|-------------------|-------------------|-------------------|
| Ru | -0.01037661585830 | 0.00835170705089  | -0.06841897934506 |
| P  | -0.24411366782856 | -0.06444284307486 | -2.29802824001741 |
| N  | -0.26382245340255 | 2.08772814919330  | 0.05245196894303  |
| N  | 0.10935950189953  | -2.09504737022713 | -0.28776084930539 |
| N  | -2.22769648993270 | 0.10801934369018  | -0.35947910499807 |
| O  | 2.95730275720406  | 0.15449567402791  | -0.07053568412703 |
| O  | 0.96678990496180  | 2.43047663665959  | -1.84052997775934 |
| C  | 3.04726585918919  | 0.49284043962440  | -4.64538989978315 |
| C  | 2.55574190779162  | 0.23859584388236  | -5.91705936092108 |
| C  | 2.20608421781701  | 0.43346830301802  | -3.54473983177992 |
| C  | 1.81021419950485  | 0.10565436813033  | -0.06808180374041 |
| C  | 1.21633724343494  | -0.08187577845614 | -6.09087158924603 |
| C  | 0.86637757098182  | 0.10368429018433  | -3.71248534069506 |
| C  | -0.89603755551288 | -1.79293846414064 | -2.47984072084701 |
| C  | -1.04881560675218 | 2.61276104184932  | 1.01101270770947  |
| C  | -1.29969541821537 | 3.95112952275198  | 1.15234573623262  |
| C  | 0.37656406703991  | -0.15657419689451 | -4.99176972708563 |
| C  | -0.29059722562056 | -2.67233430682794 | -1.43580277181046 |
| C  | -0.14743722894398 | -4.03745680033971 | -1.64049217293487 |
| C  | -0.68510530215887 | 4.82674382167094  | 0.24608443738551  |
| C  | 0.41765972372003  | -4.82394631991817 | -0.65464491370154 |
| C  | 0.66613496291753  | -2.85773183977872 | 0.65890040834230  |
| C  | 0.83858880513044  | -4.21827770465037 | 0.51690805543149  |
| C  | 0.31510259095428  | 2.91368791318414  | -0.89248022521824 |
| C  | 0.10490814981867  | 4.32275444548524  | -0.74510537913686 |
| C  | -1.73366160569558 | 0.93776134785769  | -2.60904799331776 |
| C  | -2.69991597072723 | 0.65452561182767  | -1.49889252721030 |

|   |                   |                   |                   |
|---|-------------------|-------------------|-------------------|
| C | -3.09152537072988 | -0.19655967965859 | 0.61579512008788  |
| C | -4.05037611884117 | 0.92227804303712  | -1.66270865750881 |
| C | -4.44702680110649 | 0.05526147853694  | 0.51619183981274  |
| C | -4.93648835524028 | 0.63430516857227  | -0.64039545947755 |
| H | 4.09019271008304  | 0.75034570583883  | -4.50696413127825 |
| H | 3.21495287900302  | 0.29369614606958  | -6.77508018539045 |
| H | 2.57893866511112  | 0.67358835038214  | -2.56079998972168 |
| H | -0.73827437509201 | -2.20770635684091 | -3.47471643836117 |
| H | -1.48492764720106 | 1.90071304305613  | 1.69876125883560  |
| H | 0.82551255399930  | -0.27593380213427 | -7.08241799980408 |
| H | -1.94068082861397 | 4.30073200143231  | 1.94919218616926  |
| H | -0.47849285125297 | -4.46674259976376 | -2.57700176733596 |
| H | -1.97602365880530 | -1.74138993549990 | -2.31262828815831 |
| H | 0.53698889939890  | -5.89005301610644 | -0.80311048165611 |
| H | -0.66614328966869 | -0.41686369055468 | -5.13771637840112 |
| H | -0.83932367496072 | 5.89738285612959  | 0.32814248917079  |
| H | 0.99280140521720  | -2.34293067638392 | 1.54866936204934  |
| H | 1.29837953288812  | -4.78241450485379 | 1.31663986951966  |
| H | 0.58911804247145  | 4.96200706625135  | -1.47160278616312 |
| H | -2.19550883880796 | 0.74993819543936  | -3.57966207453994 |
| H | -1.40355394322428 | 1.97868804262996  | -2.58849421942149 |
| H | -2.65618703301673 | -0.69545199412108 | 1.47596241130402  |
| H | -4.39233102126706 | 1.35768004012824  | -2.59261690788070 |
| H | -5.09753165007360 | -0.20972055468578 | 1.33874161837645  |
| H | -5.99231647470060 | 0.84871282625894  | -0.75323635704125 |
| C | 0.81106279063565  | 0.86161891747177  | 2.73329859904724  |
| C | -0.65572131520682 | -0.97483248914775 | 2.88590373019694  |
| C | 1.01157870029681  | 0.93361507680490  | 4.08499031260454  |
| H | 1.30379621993221  | 1.56946839619332  | 2.07863573088888  |
| C | -0.47349970687556 | -0.92185610667952 | 4.30748607084727  |
| C | 0.33848660373374  | 0.00452373608147  | 4.89144465689631  |
| H | 1.66872460731793  | 1.68668373948864  | 4.49646553267763  |
| H | -1.01294660374856 | -1.65811034295204 | 4.88960528155245  |
| H | 0.46198409553459  | 0.02151882578967  | 5.96915220439209  |
| O | -1.38832671215216 | -1.83248009810953 | 2.34607359790083  |
| N | 0.01507325724595  | -0.03942012388069 | 2.12261137274633  |

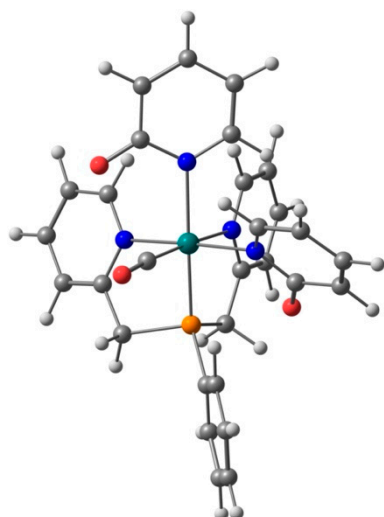

**Figure S25.** Optimized molecular structure of **4a<sup>6</sup>**.

PBE0:

final single point energy: -6486.188266474338 a.u.

final Gibbs free energy: -6485.75679510 a.u.

B2T-PLYP:

final single point energy: -6486.303803226688 a.u.

**Table S6.** Atomic coordinates for optimized structure of **4a<sup>6</sup>**.

|    |                   |                   |                   |
|----|-------------------|-------------------|-------------------|
| Ru | -0.00301665039932 | -0.03869299179271 | -0.06044288035532 |
| P  | -0.21417353658563 | -0.17116721657111 | -2.27413321574008 |
| N  | 0.02092859274786  | 2.05764187735689  | -0.00599159556884 |
| N  | -0.16640611489845 | -2.14928270065182 | -0.23991284990526 |
| N  | -2.21779121804771 | -0.21964900633666 | -0.20459342822515 |
| O  | 2.96773071444956  | -0.06495521971487 | -0.24575412326717 |
| O  | -1.39710750995722 | 2.15624779839059  | -1.79222619282833 |
| C  | 2.16079045586790  | 2.47155766226514  | -4.23681164894761 |
| C  | 1.82981447772263  | 2.26668439212058  | -5.56852724450584 |
| C  | 1.52737976877740  | 1.74249277951151  | -3.24252363746273 |
| C  | 1.82699909547293  | -0.06869370115005 | -0.12609114410956 |
| C  | 0.86438220985495  | 1.32873450754950  | -5.90786526991903 |
| C  | 0.56061391980534  | 0.80076993367997  | -3.57866255155643 |
| C  | 0.45615920533770  | -1.86486085685421 | -2.57163106534691 |
| C  | 0.80397683219991  | 2.72002709383285  | 0.86594692429078  |
| C  | 0.88000111925294  | 4.08496618950517  | 0.94592006689038  |
| C  | 0.23304567859893  | 0.59452760723388  | -4.91629399371789 |
| C  | 0.03142554357763  | -2.73835571748622 | -1.43620242088849 |
| C  | -0.16748101573206 | -4.10145745946978 | -1.60387953595705 |
| C  | 0.08800787504275  | 4.83359795737438  | 0.06529526573135  |
| C  | -0.57482565866672 | -4.87351771409409 | -0.53170619626560 |
| C  | -0.56871162789659 | -2.89730771595953 | 0.79098554800335  |
| C  | -0.78548242158563 | -4.25620586751282 | 0.68906062713710  |
| C  | -0.73164426431084 | 2.76148646831685  | -0.92269537989434 |
| C  | -0.70008445698785 | 4.18858207782836  | -0.84332544979316 |



|   |                   |                   |                   |
|---|-------------------|-------------------|-------------------|
| C | -1.99018222443024 | -0.33830551503269 | -2.65907889403955 |
| C | -2.80860323554049 | -0.36516547341710 | -1.40474474161145 |
| C | -2.97888199792604 | -0.32140443092366 | 0.89017559935856  |
| C | -4.17873661196599 | -0.57211391896204 | -1.51073136795851 |
| C | -4.34293552388816 | -0.52345544820549 | 0.85661444831557  |
| C | -4.96134588530657 | -0.64190753377767 | -0.37578888190811 |
| H | 2.90955414493497  | 3.20671634588723  | -3.96848558531012 |
| H | 2.32249838450711  | 2.84068261021774  | -6.34403412148203 |
| H | 1.77216174996769  | 1.91460822558312  | -2.20186786848066 |
| H | 1.54566576790597  | -1.75358454169432 | -2.56479758268863 |
| H | 1.38793724466686  | 2.09956614017583  | 1.53272151813768  |
| H | 0.60239479797688  | 1.16895177599474  | -6.94686309762782 |
| H | 1.53216801246696  | 4.54889541252683  | 1.67217938746805  |
| H | 0.00117804558053  | -4.54234706037594 | -2.57754878926250 |
| H | 0.17560559675029  | -2.29906009721202 | -3.53243554823769 |
| H | -0.73053763935961 | -5.93879205791051 | -0.64982217719167 |
| H | -0.51958981831860 | -0.13692546764170 | -5.18941455678994 |
| H | 0.10657446711139  | 5.91766532050729  | 0.09789224992927  |
| H | -0.72565956200346 | -2.37390056043180 | 1.72096172867900  |
| H | -1.11087205993284 | -4.81050156272215 | 1.55869681557477  |
| H | -1.31541700462858 | 4.72745568195910  | -1.55191207903492 |
| H | -2.18487811822934 | -1.24270000968876 | -3.24093361014887 |
| H | -2.28430532232526 | 0.52369644353403  | -3.25737459190585 |
| H | -2.46472507287816 | -0.24345988920967 | 1.83621897256148  |
| H | -4.61641585629797 | -0.67773048615558 | -2.49498643164489 |
| H | -4.89647275529443 | -0.58873462050786 | 1.78345208388077  |
| H | -6.03047715757404 | -0.79748338343954 | -0.45200597942107 |
| C | -0.72444442686025 | 0.90038348953342  | 2.78133517913635  |
| C | 0.89295902705185  | -0.82297852203717 | 2.79285515025592  |
| C | -0.72332009166989 | 1.04136750105827  | 4.14268738332327  |
| H | -1.33503710772979 | 1.55624296067109  | 2.17136120001064  |
| C | 0.89454014523537  | -0.71807961796254 | 4.22714734101301  |
| C | 0.11295009245335  | 0.18693132350885  | 4.88013903612911  |
| H | -1.33911288703772 | 1.79472327667591  | 4.61339914130886  |
| H | 1.56584330950652  | -1.38095866497114 | 4.75795759648165  |
| H | 0.14500221126537  | 0.25378844521929  | 5.96262417600044  |
| O | 1.63676494030922  | -1.60632997789375 | 2.18027410865454  |
| N | 0.00584877286674  | -0.00637244025144 | 2.10501274172722  |

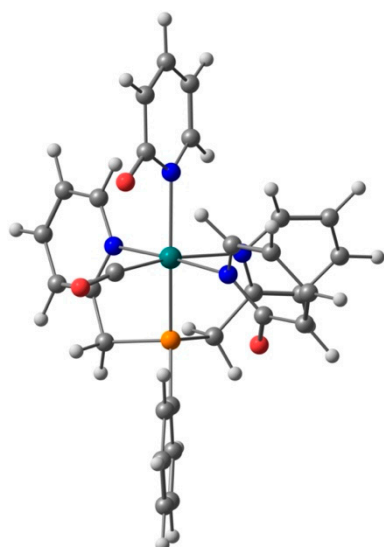

**Figure S26.** Optimized molecular structure of **4a<sup>7</sup>**.

PBE0:

final single point energy: -6486.181286899863 a.u.

final Gibbs free energy: -6485.74935027 a.u.

B2T-PLYP:

final single point energy: -6486.295921648714 a.u.

**Table S7.** Atomic coordinates for optimized structure of **4a<sup>7</sup>**.

|    |                   |                   |                   |
|----|-------------------|-------------------|-------------------|
| Ru | -0.00167173230265 | -0.07410620462441 | -0.04948578450305 |
| P  | -0.31631756680167 | -0.46846923783607 | -2.22342185029743 |
| N  | -0.09558811459224 | 2.00165106055873  | -0.26349167171677 |
| N  | -0.00789842488253 | -2.24268257230820 | 0.02230845082365  |
| N  | -2.19147628980332 | 0.15868228806715  | -0.14635353871124 |
| O  | 2.94651821870965  | -0.14871204370933 | -0.49112916956034 |
| O  | -1.29228901133162 | 1.78590914015072  | -2.21042593415093 |
| C  | 1.93877967435031  | 1.70929273696068  | -4.80218175834255 |
| C  | 1.49767564527484  | 1.28910158394384  | -6.04968586005892 |
| C  | 1.36309527636868  | 1.19641232017721  | -3.65121910397097 |
| C  | 1.83350762608397  | -0.10184921391408 | -0.21960347863583 |
| C  | 0.48302962306753  | 0.34796668698695  | -6.14370311167873 |
| C  | 0.34679940326028  | 0.25093935695374  | -3.74209213994691 |
| C  | 0.40636893143352  | -2.16123588924800 | -2.37339961664093 |
| C  | 0.47710496834770  | 2.82289128500333  | 0.63605850452260  |
| C  | 0.38378870968820  | 4.18983935033273  | 0.58671223536408  |
| C  | -0.08609361522501 | -0.17673710031757 | -4.99245726260242 |
| C  | 0.13979934787215  | -2.93364797328748 | -1.12929520534991 |
| C  | 0.07846988009766  | -4.32076507850968 | -1.15356823689837 |
| C  | -0.34370671632716 | 4.76096220906081  | -0.46291434118599 |
| C  | -0.09582765549765 | -5.02852273045096 | 0.01980333043439  |
| C  | -0.14210649210819 | -2.93984557412551 | 1.15737099704829  |
| C  | -0.19224160517452 | -4.31793108655381 | 1.20300551111786  |

|   |                   |                   |                   |
|---|-------------------|-------------------|-------------------|
| C | -0.78934656320130 | 2.53166521638802  | -1.33088722970989 |
| C | -0.91427845988123 | 3.94986531771369  | -1.40221917309614 |
| C | -2.10522134165694 | -0.85582311524372 | -2.36572381252946 |
| C | -2.85887552176193 | -0.19058676889529 | -1.26031915217500 |
| C | -2.82455275527152 | 0.90998402531834  | 0.76070827761821  |
| C | -4.20661339150568 | 0.10253768056964  | -1.41436848066424 |
| C | -4.15434798676310 | 1.26241002929778  | 0.65943255406842  |
| C | -4.87002922495586 | 0.82487845577158  | -0.44167434960199 |
| H | 2.72863267580674  | 2.44646002484241  | -4.72401345992045 |
| H | 1.94388052303236  | 1.69688979135506  | -6.94869291890106 |
| H | 1.69296824958686  | 1.54028829291548  | -2.67837517038117 |
| H | 1.48686802259040  | -2.01123905690461 | -2.47475103357427 |
| H | 1.05908779820375  | 2.32950993661712  | 1.40273260773820  |
| H | 0.13418931486824  | 0.01874561168539  | -7.11522087116651 |
| H | 0.87394793547971  | 4.78908842317102  | 1.34105073693202  |
| H | 0.18551562430870  | -4.83060368894471 | -2.10202756697277 |
| H | 0.07370499339730  | -2.70683653239024 | -3.25828069002822 |
| H | -0.14135828035504 | -6.11053083275084 | 0.01136424466209  |
| H | -0.87341669097931 | -0.91770601396923 | -5.07726137175473 |
| H | -0.44713157883006 | 5.83807760312052  | -0.53893609998013 |
| H | -0.20464648072055 | -2.36367126229183 | 2.06610695848064  |
| H | -0.30615338555282 | -4.81192396271957 | 2.15841036613904  |
| H | -1.47363707687393 | 4.34619644197887  | -2.23940536864339 |
| H | -2.21924128182785 | -1.94213705987465 | -2.30582536803703 |
| H | -2.50853837786538 | -0.53380470052675 | -3.32555742231755 |
| H | -2.22623590777088 | 1.25666777235808  | 1.59042682304836  |
| H | -4.71258241568042 | -0.20881723147533 | -2.31872868453717 |
| H | -4.60544373166406 | 1.87446229071428  | 1.42836387707628  |
| H | -5.91851405279559 | 1.07044848111668  | -0.55772505063401 |
| C | -1.05996355904543 | -0.45355761354386 | 2.84549911455123  |
| C | 1.14862412395759  | 0.35670937930496  | 2.81450997187580  |
| C | -1.11779091715707 | -0.53175852128347 | 4.21070205092159  |
| H | -1.90820236013950 | -0.79164177532798 | 2.26287211788593  |
| C | 1.11560529836564  | 0.30799977467611  | 4.25105382316808  |
| C | 0.01682151216838  | -0.12202423012358 | 4.93005873936428  |
| H | -2.00922122643609 | -0.90207149582385 | 4.69737422148930  |
| H | 2.01646960324713  | 0.62208038685404  | 4.76206464240688  |
| H | 0.02139340666570  | -0.15466492137401 | 6.01438922168489  |
| O | 2.16281460694629  | 0.71913269015660  | 2.19415514317489  |
| N | -0.00320364644118 | -0.01189412577295 | 2.13630849027948  |

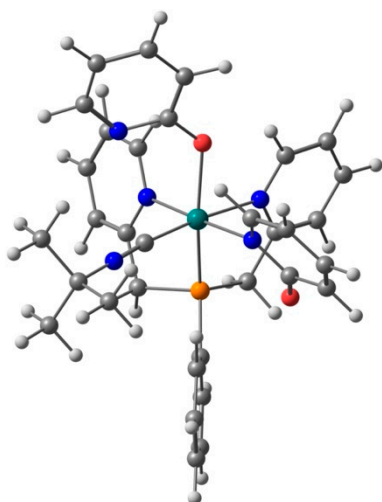

**Figure S27.** Optimized molecular structure of **5a<sup>1</sup>**.

PBE0:

final single point energy: -6623.485880982396 a.u.

final Gibbs free energy: -6622.94002378 a.u.

B2T-PLYP:

final single point energy: -6623.615457188704 a.u.

**Table S8.** Atomic coordinates for optimized structure of **5a<sup>1</sup>**.

|    |                   |                   |                   |
|----|-------------------|-------------------|-------------------|
| Ru | -0.00681675557926 | -0.11174778179668 | 0.01219446783453  |
| P  | -0.14476767232096 | -0.43381925087722 | -2.14743438052181 |
| N  | 1.62371839903464  | -1.03809783071178 | 2.82571647850250  |
| N  | -0.05260420449417 | 1.97345890108941  | -0.04838411750868 |
| N  | -0.11142769212748 | -2.21067351629110 | 0.05494079833114  |
| N  | -2.15944810548746 | -0.10176180926904 | -0.15354933216207 |
| O  | -0.26798933399350 | 0.04609051175766  | 2.12681577771847  |
| O  | -1.16083179908113 | 1.96968383580315  | -2.05037510718320 |
| C  | 2.36774596035771  | 1.90086500031484  | -4.31979229866072 |
| C  | 2.48417915924776  | -1.28039499574003 | 3.81256622919675  |
| C  | 2.11278652548697  | 1.52029960473470  | -5.63044794011204 |
| C  | 2.40091040776181  | -0.73808960146614 | 5.07953564962315  |
| C  | 1.65991788292741  | 1.32315329629628  | -3.27804410317321 |
| C  | 1.88448300941432  | -0.06281325170640 | -0.00288360154147 |
| C  | 1.14933651608129  | 0.55788574609233  | -5.89709044335542 |
| C  | 1.33061321434232  | 0.12147754691093  | 5.33278621438464  |
| C  | 0.69732713413245  | 0.35357377840741  | -3.53992679485187 |
| C  | 0.50483300361292  | -2.16354707332378 | -2.28820494921809 |
| C  | 0.50648325073143  | 2.68428325785540  | 0.94353770487278  |
| C  | 0.59128975664473  | -0.20917969214777 | 3.05771376464915  |
| C  | 0.51469087951230  | 4.05533040773495  | 0.99747282015357  |
| C  | 0.44744990154851  | -0.02864943270792 | -4.85413253745404 |
| C  | 0.42634275069994  | 0.38768849833892  | 4.33459845319074  |
| C  | 0.09250774596655  | -2.92407266618789 | -1.07196323663705 |
| C  | -0.08148564667563 | -4.30070702888158 | -1.08795364379406 |
| C  | -0.10586478962512 | 4.74873242614943  | -0.04864147700932 |
| C  | -0.45913796585847 | -4.96086232636485 | 0.06759401169086  |

|   |                   |                   |                   |
|---|-------------------|-------------------|-------------------|
| C | -0.48221060998274 | -2.85103681878032 | 1.16894678222219  |
| C | -0.66314937072091 | -4.21854016900247 | 1.21867962686733  |
| C | -0.65968659565535 | 2.62109924502839  | -1.10407894867415 |
| C | -0.67930974368045 | 4.04997205900507  | -1.07313757763054 |
| C | -1.92572676345724 | -0.62532948729455 | -2.54308260255325 |
| C | -2.76158574660038 | -0.31448316352224 | -1.33636040890790 |
| C | -2.90562268599796 | 0.18790544944380  | 0.91700232349179  |
| C | -4.14391539678673 | -0.25129846604745 | -1.45119493551691 |
| C | -4.28233882955929 | 0.27283233062201  | 0.86690390081407  |
| C | -4.91550469723323 | 0.04634988583060  | -0.34382190377472 |
| H | 3.11226027939874  | 2.65948989710056  | -4.10915543630263 |
| H | 3.29970992769304  | -1.95813085898536 | 3.56790214413069  |
| H | 2.66147623652973  | 1.97761715394809  | -6.44509881089265 |
| H | 3.13720926163154  | -0.97507751879827 | 5.83603600917441  |
| H | 1.83747462907341  | 1.63203527198339  | -2.25542140999687 |
| H | 1.59477422622564  | -2.05425276020540 | -2.29570751133881 |
| H | 0.96105666518562  | 2.09871788381670  | 1.73130604652599  |
| H | 1.21329909385803  | 0.58119665139480  | 6.30839700114858  |
| H | 0.94403011178968  | 0.26260416921113  | -6.91918509049225 |
| H | 0.98465223351755  | 4.56321550016775  | 1.82803969668361  |
| H | 0.08475228629507  | -4.84170391433527 | -2.01048729299525 |
| H | 0.22125779401309  | -2.68771027437775 | -3.20264963849303 |
| H | -0.59543837874252 | -6.03536316299643 | 0.06731748290909  |
| H | -0.30164132370491 | -0.78255705056343 | -5.07084283110960 |
| H | -0.12944057279494 | 5.83347282564048  | -0.05017700541889 |
| H | -0.41314974747871 | 1.05402876622154  | 4.48928296921475  |
| H | -0.63654962654406 | -2.22045869457582 | 2.03171565085734  |
| H | -0.96293635188612 | -4.68279271847037 | 2.14852510795259  |
| H | -1.16388220512646 | 4.54808457111457  | -1.90293964329871 |
| H | -2.13223740410333 | -1.64364764761415 | -2.88440959175594 |
| H | -2.19133345555797 | 0.06027246036202  | -3.34736888873898 |
| H | -2.34566403856517 | 0.35214143659402  | 1.82969785935724  |
| H | -4.60081057711529 | -0.42440267969510 | -2.41703675192693 |
| H | -4.83801939015638 | 0.51569514815629  | 1.76266602220632  |
| H | -5.99391254564239 | 0.10614911456007  | -0.42703156798979 |
| N | 3.04532950466922  | 0.02774397854272  | -0.09691274536890 |
| C | 4.45684448631452  | 0.21586200153530  | -0.15006954489064 |
| C | 5.07229257431591  | -0.37863743647891 | 1.11257310047875  |
| H | 4.85013548240396  | -1.44419636210423 | 1.18011386988391  |
| H | 6.15497388544877  | -0.24490072503768 | 1.09028973203390  |
| H | 4.67296262046416  | 0.11242973339570  | 2.00018609945431  |
| C | 4.72832627489843  | 1.71600960381608  | -0.22876324113030 |
| H | 5.80429587523286  | 1.89300113731951  | -0.26619721559726 |
| H | 4.27193055291299  | 2.14050822744417  | -1.12395194984856 |
| H | 4.31813608614739  | 2.22425684381797  | 0.64447093543220  |
| C | 4.98458451006795  | -0.48999906266842 | -1.39587945935064 |
| H | 4.77270060786988  | -1.55907579508386 | -1.34752999558712 |
| H | 4.51818638961655  | -0.08076086156248 | -2.29327114267392 |

|   |                  |                   |                   |
|---|------------------|-------------------|-------------------|
| H | 6.06439450925888 | -0.35176007188597 | -1.46751919554915 |
|---|------------------|-------------------|-------------------|

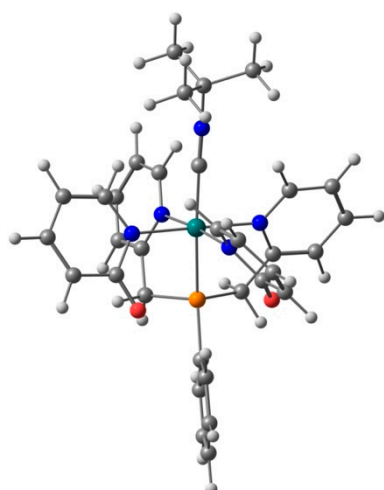

**Figure S28.** Optimized molecular structure of **5a<sup>3</sup>**.

PBE0:

final single point energy: -6623.466914284028 a.u.

final Gibbs free energy: -6622.91949136 a.u.

B2T-PLYP:

final single point energy: -6623.592996168088 a.u.

**Table S9.** Atomic coordinates for optimized structure of **5a<sup>3</sup>**.

|    |                   |                   |                   |
|----|-------------------|-------------------|-------------------|
| Ru | 0.04580701715467  | 0.02762901536721  | 0.02336912468331  |
| P  | 0.26426005521373  | 0.16757381102720  | -2.27643080677213 |
| O  | -2.21990057009921 | -0.96711267180721 | -2.01483308482947 |
| O  | 1.59998358962458  | -2.07996405411905 | -1.70565483594250 |
| N  | 2.15225095824487  | 0.09127676154845  | -0.04639165036337 |
| N  | -0.07970491423420 | 2.12020370398298  | -0.20522501345268 |
| N  | -2.06730323944070 | 0.00593095462161  | 0.05002656153511  |
| N  | 0.13421119170165  | -2.05127809185169 | 0.05766644974738  |
| N  | 0.04937957831162  | 0.00503604082734  | 3.12426859036932  |
| C  | 2.00483274459693  | 0.79490476292338  | -2.38738406812317 |
| H  | 2.50373146211297  | 0.40829776783435  | -3.27551660587524 |
| H  | 1.97968681073020  | 1.88488815225014  | -2.48400483569825 |
| C  | 2.79911463433124  | 0.42673778997305  | -1.17939223541232 |
| C  | 4.18661567929496  | 0.42628273325590  | -1.24273478878516 |
| H  | 4.66437425827291  | 0.70193045628242  | -2.17391743187257 |
| C  | 4.93642094272883  | 0.05563664058737  | -0.14443806449244 |
| H  | 6.01829864025432  | 0.04262924215146  | -0.19170803072017 |
| C  | 4.26571272250906  | -0.31417650140863 | 1.00883830337718  |
| H  | 4.79195301660869  | -0.63381815681301 | 1.89828186121852  |
| C  | 2.88755116413611  | -0.28039320713222 | 1.01068167847795  |
| H  | 2.33639913518314  | -0.57740841307612 | 1.88990086837375  |
| C  | -0.68932387718235 | 1.72708630182508  | -2.53778020278086 |
| H  | -0.49697557433138 | 2.23030121456832  | -3.48642006411808 |
| H  | -1.73356012907797 | 1.40178999992914  | -2.53681717983001 |
| C  | -0.43002304565099 | 2.65273184925464  | -1.39789576784209 |

|   |                   |                   |                   |
|---|-------------------|-------------------|-------------------|
| C | -0.52051484279471 | 4.02971454275953  | -1.56670391219422 |
| H | -0.79984893917523 | 4.41694411747590  | -2.53789876133530 |
| C | -0.26128418777944 | 4.88178613866318  | -0.51125608587925 |
| H | -0.33468558447934 | 5.95489756192593  | -0.63698061599940 |
| C | 0.09954596992006  | 4.32843588440683  | 0.70679463847087  |
| H | 0.32158818446808  | 4.94331593714091  | 1.56865218783592  |
| C | 0.17838838678395  | 2.95643453955721  | 0.81132471135931  |
| H | 0.46385859636754  | 2.48847535234675  | 1.74261073081857  |
| C | -2.79071355725996 | -0.55143798922344 | -0.98972373042287 |
| C | -4.21798968789967 | -0.61017022946576 | -0.84699148324164 |
| H | -4.76012110185942 | -1.09177327721449 | -1.65053689428472 |
| C | -4.85592331720393 | -0.06469666448566 | 0.22630629849272  |
| H | -5.93717529610160 | -0.11104613656270 | 0.30299312559761  |
| C | -4.09675617596978 | 0.56432572090811  | 1.22383783801107  |
| H | -4.54998924457675 | 1.03502619932229  | 2.08527444437094  |
| C | -2.73428858924420 | 0.56216584527885  | 1.07909800662473  |
| H | -2.12019310244078 | 1.03622747494747  | 1.83323070910234  |
| C | 0.94893206330527  | -2.71111967488326 | -0.84500773709766 |
| C | 0.99686313695466  | -4.13928614774656 | -0.75657821280223 |
| H | 1.65387507142767  | -4.64417644700989 | -1.45300350982980 |
| C | 0.23464371673617  | -4.82833495521998 | 0.14239351438922  |
| H | 0.28138103271773  | -5.91166388460216 | 0.17892731231151  |
| C | -0.61391018681902 | -4.12543220758995 | 1.00752127263348  |
| H | -1.25375740215818 | -4.62485080798960 | 1.72167813170612  |
| C | -0.61806560809711 | -2.75715759144103 | 0.91674282835281  |
| H | -1.26476630648994 | -2.17023838321940 | 1.55689121905270  |
| C | 0.05055205769695  | -0.70145164776074 | -3.85875370232684 |
| C | 0.39670105542337  | -0.03548303630001 | -5.03205980798950 |
| H | 0.76444151700481  | 0.98428894877058  | -4.99540856857895 |
| C | 0.28369357282309  | -0.66485164712493 | -6.26332490160936 |
| H | 0.55584220994599  | -0.13350505842473 | -7.16769306047510 |
| C | -0.17545965477187 | -1.97131313838288 | -6.32949048654853 |
| H | -0.26460310472099 | -2.46826043841008 | -7.28838932298935 |
| C | -0.52168964808781 | -2.63909035921556 | -5.16270458115906 |
| H | -0.88292418186445 | -3.65958327890537 | -5.20863529600518 |
| C | -0.41139613475359 | -2.01037042220368 | -3.93318493359033 |
| H | -0.69786463740781 | -2.52359716600206 | -3.02910994497869 |
| C | 0.04020640739080  | 0.04816131575915  | 1.95463606670345  |
| C | -0.07344833037014 | -0.22632454439818 | 4.53054921740808  |
| C | -0.42781802639687 | 1.09554954989093  | 5.20326966866120  |
| H | 0.35258551978208  | 1.83758793580307  | 5.02894232895508  |
| H | -0.52869431498182 | 0.94295216077357  | 6.27852687620010  |
| H | -1.37198119783187 | 1.48098393046363  | 4.81632540803831  |
| C | 1.26136317672966  | -0.75612917407941 | 5.04381412891704  |
| H | 1.52004314794428  | -1.68907292311865 | 4.54148913239704  |
| H | 1.19162675901616  | -0.94503729978027 | 6.11583788405160  |
| H | 2.05670723145290  | -0.03011618553157 | 4.86927886652353  |
| C | -1.18073352277905 | -1.25526107865961 | 4.73980947762026  |

|   |                   |                   |                  |
|---|-------------------|-------------------|------------------|
| H | -2.12545837373863 | -0.88872080019368 | 4.33639280767174 |
| H | -1.30431224260367 | -1.44578178442484 | 5.80684991702995 |
| H | -0.92966397922726 | -2.19259790862592 | 4.24222274915871 |

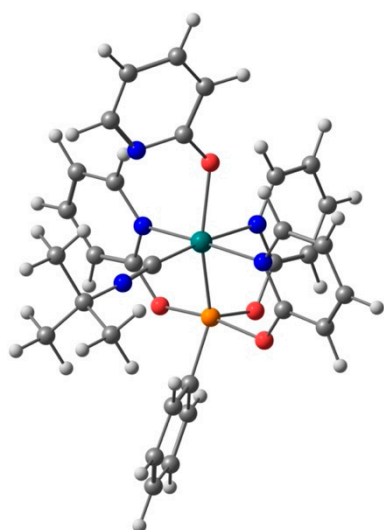

**Figure S29.** Optimized molecular structure of **5b<sup>1</sup>**.

PBE0:

final single point energy: -6695.456175078394 a.u.

final Gibbs free energy: -6694.95599890 a.u.

B2T-PLYP:

final single point energy: -6695.619546962183 a.u.

**Table S10.** Atomic coordinates for optimized structure of **5b<sup>1</sup>**.

|    |                   |                   |                   |
|----|-------------------|-------------------|-------------------|
| Ru | 0.01763214349333  | 0.10498473790391  | 0.15734181108592  |
| P  | -0.24730357133079 | 0.26919094364059  | -1.98943344342971 |
| N  | 1.73144129179311  | -0.68979298575274 | 3.00471093393193  |
| N  | -0.07077644328125 | 2.17488813715564  | 0.24681420936973  |
| N  | 0.00601142963991  | -1.95245636836645 | -0.06828244096239 |
| N  | -2.14229878655077 | 0.06231897143534  | -0.02771908887092 |
| O  | -0.31289343093788 | 0.02533340170426  | 2.26303806418001  |
| O  | -0.26519596542030 | 2.13548617062620  | -2.03652127849560 |
| C  | 2.56020746507797  | 1.02343585722712  | -4.80662142002353 |
| C  | 2.54881752751788  | -0.89030059963703 | 4.03720742711900  |
| C  | 2.00449081311256  | 0.51415730159669  | -5.97162213226480 |
| C  | 2.23826050099673  | -0.60720342537345 | 5.35182507298100  |
| C  | 1.85049170458866  | 0.96631727399498  | -3.61738496479079 |
| C  | 1.91994487097226  | 0.15011205807000  | 0.11420583502682  |
| C  | 0.74287386061780  | -0.06362280296712 | -5.94122128740549 |
| C  | 0.97200853769029  | -0.07666588731405 | 5.60484169749166  |
| C  | 0.59277992698418  | 0.37409620561579  | -3.58439930016162 |
| C  | -0.00177151140468 | 2.88549064508133  | 1.38269406145968  |
| C  | 0.51100849141142  | -0.17867991384343 | 3.23654390158107  |
| C  | -0.05166165004333 | 4.25838764346512  | 1.40831835934310  |
| C  | 0.04176985228034  | -0.14846210560603 | -4.74810408495267 |
| C  | 0.10763011039232  | 0.13778568829505  | 4.56033541521769  |



|   |                   |                   |                   |
|---|-------------------|-------------------|-------------------|
| C | -0.19014853462386 | -2.41270361900737 | -1.32012080646552 |
| C | -0.23792883121871 | -3.79162193301530 | -1.57403192887217 |
| C | -0.18179915906111 | 4.93569792537541  | 0.19697319330888  |
| C | -0.08251663349814 | -4.67554219267612 | -0.53362913799574 |
| C | 0.16230298442263  | -2.82643990650396 | 0.93765801650120  |
| C | 0.12448820016191  | -4.18815611088964 | 0.75537790689258  |
| C | -0.20074724429829 | 2.81900096373231  | -0.92981130016423 |
| C | -0.25726960874430 | 4.22029461980713  | -0.97358619347517 |
| C | -2.68921980586730 | 0.17165854830591  | -1.24548184397982 |
| C | -2.95316473391603 | -0.08046241760525 | 1.03102421240336  |
| C | -4.06613715445667 | 0.14575366160978  | -1.44749243277663 |
| C | -4.32344954788533 | -0.11648568899757 | 0.91546647343099  |
| C | -4.88678744276067 | 0.00002434225941  | -0.35145130149514 |
| H | 3.54432261193701  | 1.47640827811156  | -4.82505605098641 |
| H | 3.52252894588932  | -1.30812304848717 | 3.79016342689392  |
| H | 2.55358334183061  | 0.56894775910220  | -6.90399068341455 |
| H | 2.95085430005075  | -0.79248302118240 | 6.14443403103288  |
| H | 2.27246381003480  | 1.38525877093157  | -2.71184145952175 |
| H | 0.08665811801554  | 2.29506056203642  | 2.28399310077476  |
| H | 0.67028387076116  | 0.16714843305166  | 6.61791933269777  |
| H | 0.30453073702092  | -0.45834900534560 | -6.84997754401476 |
| H | 0.00928280118426  | 4.78294949236664  | 2.35157228434056  |
| H | -0.39664367399615 | -4.11974894627683 | -2.59190697176225 |
| H | -0.11879309226073 | -5.74247290752561 | -0.71979858857142 |
| H | -0.93148772525974 | -0.62066339635288 | -4.72055193818476 |
| H | -0.22524417439030 | 6.01819738247186  | 0.17350085239851  |
| H | -0.88247647157844 | 0.54806323722396  | 4.71641039298482  |
| H | 0.34027464770720  | -2.38240502555987 | 1.90619989182040  |
| H | 0.25831464090576  | -4.84844168784380 | 1.60075543868180  |
| H | -0.36148690251182 | 4.69862450020786  | -1.93754135578821 |
| H | -2.43785992048486 | -0.15881338115908 | 1.98044925382240  |
| H | -4.44983809670537 | 0.23946500750776  | -2.45347773026117 |
| H | -4.93567236498366 | -0.23309711534618 | 1.79889676298895  |
| H | -5.96185929981500 | -0.02395347478384 | -0.48138382951321 |
| N | 3.07678509352431  | 0.20067223619130  | -0.02003310533804 |
| C | 4.49871972128486  | 0.17020311191403  | -0.12665544187304 |
| C | 5.07032124615697  | -0.32603035041089 | 1.19735216756245  |
| H | 4.70089319636949  | -1.32748847521699 | 1.41956414952585  |
| H | 6.15925583634418  | -0.35608330346755 | 1.13588091036002  |
| H | 4.77969897858286  | 0.33717051864766  | 2.01227607972370  |
| C | 4.98266695340213  | 1.58539434386166  | -0.42832209030601 |
| H | 6.07000335627154  | 1.58898103301574  | -0.51611478829869 |
| H | 4.55581855039119  | 1.94510775612931  | -1.36562850033927 |
| H | 4.69346777347771  | 2.26759018922972  | 0.37181003019602  |
| C | 4.86641983688522  | -0.77739389949684 | -1.26511300298409 |
| H | 4.49869745041434  | -1.78295664414232 | -1.05798779323114 |
| H | 4.43229724963093  | -0.43539225109344 | -2.20549224475686 |
| H | 5.95144790923113  | -0.81583942252778 | -1.37244866194897 |

|   |                   |                   |                   |
|---|-------------------|-------------------|-------------------|
| O | -1.89571195144386 | 0.31447132510732  | -2.30920878029685 |
| O | -0.32955172972819 | -1.57129665023556 | -2.30399634915601 |

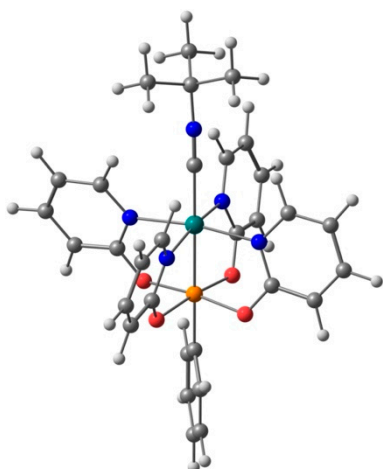

**Figure S30.** Optimized molecular structure of **5b<sup>3</sup>**.

PBE0:

final single point energy: -6695.449729791554 a.u.

final Gibbs free energy: -6694.95599890 a.u.

B2T-PLYP:

final single point energy: -6695.610018628110 a.u.

**Table S11.** Atomic coordinates for optimized structure of **5b<sup>3</sup>**.

|    |                   |                   |                  |
|----|-------------------|-------------------|------------------|
| Ru | 7.66825868862418  | 3.80677450500988  | 3.96405647052781 |
| P  | 9.24429743689518  | 3.79227125258897  | 5.62639095268228 |
| O  | 8.56887920422945  | 2.23849704686397  | 6.40885567227506 |
| O  | 10.44297906717978 | 2.75108843591173  | 4.64428324670889 |
| N  | 6.67046086952581  | 2.39544663142573  | 5.11777616493715 |
| N  | 8.79438375730235  | 2.27950972305552  | 3.10967557210924 |
| N  | 5.54085981720760  | 3.81239945594992  | 1.65481578343171 |
| C  | 7.36154069891206  | 1.84840841825620  | 6.14491009169035 |
| C  | 6.78262612030041  | 0.84462667704991  | 6.94210017569681 |
| H  | 7.37885568392824  | 0.43151139603646  | 7.74391859175993 |
| C  | 5.50053395898038  | 0.42632297235577  | 6.69269283977373 |
| H  | 5.05050265451335  | -0.34574964305226 | 7.30546998403182 |
| C  | 4.78592458843267  | 1.01267838808242  | 5.64796720348519 |
| H  | 3.76985482746942  | 0.72378701328508  | 5.41755534463007 |
| C  | 5.40967341850784  | 1.98028520689284  | 4.90083692714049 |
| H  | 4.89945301537327  | 2.46179302324304  | 4.07843176462349 |
| C  | 10.02206021775869 | 2.05776029801915  | 3.63424398366259 |
| C  | 10.86380460056524 | 1.06955004271397  | 3.09214947911351 |
| H  | 11.83724309690370 | 0.93475385331616  | 3.54291609576820 |
| C  | 10.43533324462480 | 0.30882254496272  | 2.03489366808708 |
| H  | 11.08013510988655 | -0.45509571196575 | 1.61681620653179 |
| C  | 9.15922660809528  | 0.52661760955502  | 1.51523186257271 |
| H  | 8.77123291414753  | -0.05341593250029 | 0.68939899901872 |
| C  | 8.38963424245844  | 1.51115271670196  | 2.08248587665576 |

|   |                   |                  |                   |
|---|-------------------|------------------|-------------------|
| H | 7.39474987599425  | 1.71773139078195 | 1.71397459742961  |
| C | 10.51538590874667 | 3.77806737027519 | 6.96885575437682  |
| C | 10.15270947451323 | 3.54639170589134 | 8.29169956647537  |
| H | 9.11523195944476  | 3.37415630622878 | 8.53785445858772  |
| C | 11.10558165564371 | 3.53472157971556 | 9.29960989070454  |
| H | 10.79826946031653 | 3.35280576181905 | 10.32304426350039 |
| C | 12.44205156067333 | 3.75351847933752 | 9.00196078624184  |
| H | 13.18758902323820 | 3.74372653924877 | 9.78858976708400  |
| C | 12.81379673383681 | 3.98495601959419 | 7.68630098117571  |
| H | 13.85444292806323 | 4.15726425337749 | 7.43661991532303  |
| C | 11.85857204622197 | 3.99765509250115 | 6.68068755303415  |
| H | 12.16245230294084 | 4.17866856203502 | 5.66014280157891  |
| C | 6.32583288431482  | 3.81392579615152 | 2.52566300493230  |
| C | 4.64127481675643  | 3.76193876452504 | 0.54576772425283  |
| C | 4.15150453960430  | 2.32473915598967 | 0.39606460290403  |
| H | 4.98959587931584  | 1.65104238962378 | 0.21302161506247  |
| H | 3.46115113490417  | 2.25898984931926 | -0.44595612743218 |
| H | 3.63301753386708  | 1.99963006881112 | 1.29883193532759  |
| C | 5.40038075299818  | 4.20566644552411 | -0.70138929084743 |
| H | 4.73582996243628  | 4.17262103947712 | -1.56580595591003 |
| H | 5.76802778746657  | 5.22588119082772 | -0.58369215490920 |
| O | 10.07586420534279 | 5.34277893694826 | 5.01202525201763  |
| N | 8.89339245265936  | 5.21185955787756 | 3.04290976485631  |
| C | 9.88937498947789  | 5.73901024946120 | 3.79202327887878  |
| C | 10.73870259914150 | 6.72650716837046 | 3.26159336914780  |
| H | 11.51312391085684 | 7.12277694506798 | 3.90367917664264  |
| C | 10.57311547547670 | 7.14939290861774 | 1.96756894158344  |
| H | 11.22696467563014 | 7.90827685186434 | 1.55442189258150  |
| C | 9.56024127392458  | 6.58355085256921 | 1.19339448075409  |
| H | 9.39485160721793  | 6.87578594193868 | 0.16566344265728  |
| C | 8.75891765866754  | 5.63128584022728 | 1.77197579728087  |
| H | 7.95926178299831  | 5.16621928642802 | 1.21303619149018  |
| C | 3.47522594706870  | 4.70297299667236 | 0.83060858454962  |
| H | 3.83069553111631  | 5.72636622048787 | 0.95728777478873  |
| H | 2.77310892821152  | 4.67874121536200 | -0.00380815735789 |
| H | 2.95025137649570  | 4.40015743703878 | 1.73736562168451  |
| H | 6.24945314957567  | 3.54688567944007 | -0.88801964840808 |
| O | 8.20808203957224  | 4.83187197727763 | 6.77931259887935  |
| N | 6.76607940427407  | 5.32750828368620 | 5.05600038840101  |
| C | 7.22770695845101  | 5.53733517634180 | 6.31043079591770  |
| C | 6.65147204157966  | 6.52592381324770 | 7.12867131610483  |
| H | 7.05348370684463  | 6.65240856155753 | 8.12430935757274  |
| C | 5.62281771244344  | 7.29659805739285 | 6.65124551588035  |
| H | 5.17848248098739  | 8.06080966770127 | 7.27785274263653  |
| C | 5.16595476650794  | 7.08805642960911 | 5.34975475563607  |
| H | 4.36360556552785  | 7.67455098081165 | 4.92413069036767  |
| C | 5.76466963968144  | 6.10378225701192 | 4.60410795349433  |
| H | 5.44481605714834  | 5.90309302217655 | 3.59125547615457  |

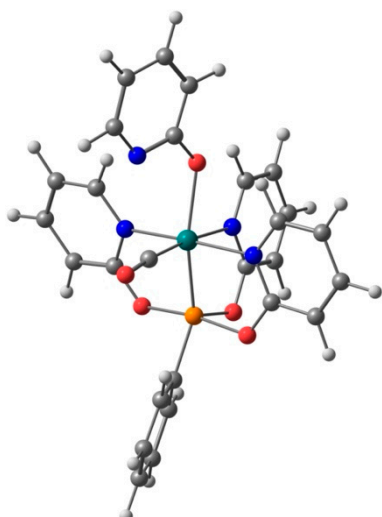

**Figure S31.** Optimized molecular structure of **4b<sup>1</sup>**.

PBE0:

final single point energy: -6558.160689132269 a.u.

final Gibbs free energy: -6557.77707407 a.u.

B2T-PLYP:

final single point energy: -6558.322011793353 a.u.

**Table S12.** Atomic coordinates for optimized structure of **4b<sup>1</sup>**.

|    |                   |                   |                   |
|----|-------------------|-------------------|-------------------|
| Ru | -0.04677717339654 | 0.01632015042729  | -0.06794781537517 |
| P  | -0.66653860079855 | 0.10770768756537  | -2.17215514321226 |
| O  | -0.94835738872366 | -1.74749709414429 | -2.30806068196702 |
| O  | -2.33525787794148 | 0.26489471477728  | -2.19940881489789 |
| O  | 2.86785472385068  | 0.05925323210554  | -0.73051675091074 |
| O  | -0.07697857038125 | 0.01751933884992  | 2.04631604443504  |
| O  | -0.53978572618595 | 1.93256426864635  | -2.32725951005496 |
| N  | 2.13059308540555  | -0.48349029895016 | 2.34148545109092  |
| N  | -0.13819694271766 | 2.09193937371987  | -0.07497092647392 |
| N  | -0.14470314728763 | -2.04824885313307 | -0.18203465490099 |
| N  | -2.22336124368331 | -0.00966272280122 | 0.08689555409554  |
| C  | 1.58939949775607  | 0.44651740099108  | -5.51840736493274 |
| C  | 3.15426481270778  | -0.65114506238159 | 3.17774043812553  |
| C  | 0.78347387353811  | -0.09756043042700 | -6.50753034575922 |
| C  | 3.06946929423450  | -0.51198889556098 | 4.54806654207071  |
| C  | 1.12961520857769  | 0.52425899547086  | -4.21284335563472 |
| C  | 1.76883056278418  | 0.03149803509476  | -0.40892749926231 |
| C  | -0.47904661296975 | -0.57737184367166 | -6.18712147740678 |
| C  | 1.82369267246940  | -0.17342722848704 | 5.07866702443376  |
| C  | -0.12977604224949 | 0.03141144396845  | -3.89107628686793 |
| C  | 0.02508841301842  | 2.85537577954372  | 1.01630761582142  |
| C  | 0.93264671620857  | -0.15347303653610 | 2.84098605512300  |
| C  | -0.03261697566435 | 4.22691289024389  | 0.97639208784337  |
| C  | -0.93243639746599 | -0.52830460205489 | -4.87864481665423 |
| C  | 0.75346089950761  | 0.00660707521373  | 4.23692273136895  |

|   |                   |                   |                   |
|---|-------------------|-------------------|-------------------|
| C | -0.62051379106383 | -2.55009450338803 | -1.33905606621259 |
| C | -0.76261040576638 | -3.93671822510532 | -1.50457962661928 |
| C | -0.27191802626893 | 4.84176879507478  | -0.25134189579211 |
| C | -0.41114533398041 | -4.77855674760624 | -0.47822711656739 |
| C | 0.20334205492043  | -2.88145314391627 | 0.81053490239207  |
| C | 0.08690194526118  | -4.24585895878596 | 0.71006258939081  |
| C | -0.37864270497886 | 2.67470729991820  | -1.26379811129004 |
| C | -0.44716557164855 | 4.06961961752817  | -1.37442946306387 |
| C | -2.95417506856332 | 0.11052181373164  | -1.02738328315069 |
| C | -2.85556685952057 | -0.16206777043310 | 1.26002394292298  |
| C | -4.34525996160091 | 0.09037049986926  | -1.01091959131963 |
| C | -4.22672554081842 | -0.19242083291299 | 1.36129220447432  |
| C | -4.98225566342201 | -0.06154637216567 | 0.20026176486719  |
| H | 2.57628664747828  | 0.81996705136612  | -5.76284542856911 |
| H | 4.10106922432565  | -0.91440771100902 | 2.71261636043861  |
| H | 1.13900504441112  | -0.14792491894180 | -7.52966596854770 |
| H | 3.93726039461964  | -0.66061693497148 | 5.17648117132838  |
| H | 1.75228592406974  | 0.96858166741649  | -3.44600926842624 |
| H | 0.19905665434752  | 2.30886446578015  | 1.93280737461733  |
| H | 1.69776920627474  | -0.05077886152277 | 6.14896831366640  |
| H | -1.11181620554938 | -0.99992104946437 | -6.95824302611993 |
| H | 0.10832547979070  | 4.79927262355143  | 1.88240041643352  |
| H | -1.14699823328657 | -4.30278339275034 | -2.44630975370739 |
| H | -0.51777164172909 | -5.85023378464392 | -0.59756897784724 |
| H | -1.90711093241960 | -0.92319954602799 | -4.62447499444807 |
| H | -0.32317558574231 | 5.92152558434239  | -0.32435901580168 |
| H | -0.22772504352549 | 0.27071425314546  | 4.61118132037163  |
| H | 0.59522006756467  | -2.40480994127435 | 1.69712000774678  |
| H | 0.38318168475222  | -4.87454918238018 | 1.53776748531858  |
| H | -0.64017651252571 | 4.49867450006655  | -2.34762571427913 |
| H | -2.19768943427325 | -0.24956646721115 | 2.11547142332927  |
| H | -4.88234135941860 | 0.19170544399957  | -1.94314518697842 |
| H | -4.69249120374912 | -0.31568291241838 | 2.32901710473384  |
| H | -6.06439413155753 | -0.08140667933095 | 0.24197455561144  |

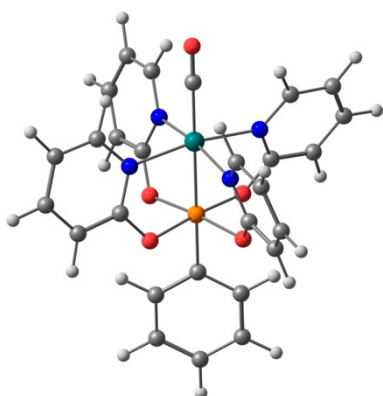

**Figure S32.** Optimized molecular structure of **4b<sup>3</sup>**.

PBE0:

final single point energy: -6558.156643837847 a.u.

final Gibbs free energy: -6557.77027133 a.u.

B2T-PLYP:

final single point energy: -6558.315616067810 a.u.

**Table S13.** Atomic coordinates for optimized structure of **4b<sup>3</sup>**.

|    |                   |                   |                   |
|----|-------------------|-------------------|-------------------|
| Ru | -0.00148717715240 | 0.00118164661342  | -0.05591876365613 |
| P  | -0.00119438663172 | 0.00061045824695  | -2.38039112013570 |
| C  | -0.00135327940005 | 0.00104429952598  | 1.84226912045749  |
| O  | -0.00097598143180 | 0.00001923422801  | 2.99347970652635  |
| N  | -0.00233365233653 | -2.07302986175485 | -0.25399027426439 |
| N  | 2.07252958957769  | 0.00092052549796  | -0.25468090471864 |
| N  | -2.07543311557163 | 0.00164506302282  | -0.25456339610934 |
| N  | -0.00085420770600 | 2.07525618940449  | -0.25454309019378 |
| C  | 0.28847754617067  | -2.56941779251522 | -1.47675879811576 |
| C  | 0.35205890229835  | -3.95685963579547 | -1.69017937402882 |
| H  | 0.59295422264386  | -4.30325513594839 | -2.68545343419931 |
| C  | 0.10035606737105  | -4.81920720797407 | -0.65440961084762 |
| H  | 0.14563291141885  | -5.88985562586991 | -0.81391759607052 |
| C  | -0.22297491788843 | -4.30009778009199 | 0.59911375038343  |
| H  | -0.43843094951995 | -4.93829299673823 | 1.44451278892023  |
| C  | -0.26134126773444 | -2.93696383610765 | 0.74530339835345  |
| H  | -0.50599289867107 | -2.49053876020516 | 1.69863676655958  |
| C  | 2.56719292193962  | 0.30099145344790  | -1.47578049189724 |
| C  | 3.95384964731680  | 0.37581979402496  | -1.68887154778294 |
| H  | 4.29871054528220  | 0.62939434403318  | -2.68159643144686 |
| C  | 4.81789888470242  | 0.12228480390326  | -0.65463725545790 |
| H  | 5.88824535548908  | 0.17660375284180  | -0.81333938906692 |
| C  | 4.30080464192734  | -0.21361950741693 | 0.59626406124160  |
| H  | 4.94042116810156  | -0.43087323625948 | 1.44012891225971  |
| C  | 2.93779741178919  | -0.26011279730305 | 0.74273988269936  |
| H  | 2.49275940832804  | -0.51253766169211 | 1.69471710427826  |
| C  | -2.57020351932102 | -0.29910680253588 | -1.47550218973631 |

|   |                   |                   |                   |
|---|-------------------|-------------------|-------------------|
| C | -3.95696377156240 | -0.37343990641760 | -1.68840792962356 |
| H | -4.30200084541870 | -0.62759161018679 | -2.68092611451727 |
| C | -4.82084719920686 | -0.11873573801976 | -0.65434182558762 |
| H | -5.89122584437722 | -0.17267638627129 | -0.81297159268199 |
| C | -4.30357097299245 | 0.21786864124467  | 0.59631096234610  |
| H | -4.94306198302062 | 0.43604554519680  | 1.44003186412110  |
| C | -2.94054208435305 | 0.26382559662852  | 0.74268950034011  |
| H | -2.49532757695617 | 0.51674002370697  | 1.69445821666284  |
| C | -0.29160452376176 | 2.57123057223804  | -1.47751734027316 |
| C | -0.35551672802001 | 3.95863885304720  | -1.69123324726645 |
| H | -0.59634711204614 | 4.30474850323273  | -2.68662356482370 |
| C | -0.10424246056817 | 4.82129153103510  | -0.65562413842748 |
| H | -0.14979493835494 | 5.89189049096457  | -0.81539230307993 |
| C | 0.21899289952282  | 4.30257700028371  | 0.59809802339852  |
| H | 0.43409961984441  | 4.94103570692884  | 1.44338664754076  |
| C | 0.25770642251849  | 2.93949189602879  | 0.74460596781468  |
| H | 0.50228376139300  | 2.49331590972560  | 1.69807861487300  |
| C | -0.00172343335155 | 0.00038403884664  | -4.22656277385646 |
| C | 1.04373896986461  | -0.57886794256680 | -4.93828906502558 |
| H | 1.86528887686919  | -1.03486535819983 | -4.40524213287380 |
| C | 1.04414086945108  | -0.58045312870340 | -6.32520389085658 |
| H | 1.86880658535203  | -1.03871727139715 | -6.85870417214297 |
| C | -0.00233448635854 | -0.00008846093034 | -7.02569162803684 |
| H | -0.00257681449400 | -0.00027098984754 | -8.10942146193077 |
| C | -1.04850051428746 | 0.58051336738142  | -6.32493033338088 |
| H | -1.87340120437715 | 1.03859605124252  | -6.85822294704214 |
| C | -1.04749628441155 | 0.57939665967861  | -4.93801960761790 |
| H | -1.86880389285039 | 1.03555703825665  | -4.40474738329641 |
| O | -0.51826474859463 | 1.77338448877108  | -2.47582309345744 |
| O | 1.76666507981033  | 0.52792466326484  | -2.47267257682394 |
| O | 0.51553679079732  | -1.77184630139565 | -2.47525529765670 |
| O | -1.76983510905116 | -0.52709916034945 | -2.47213893476877 |

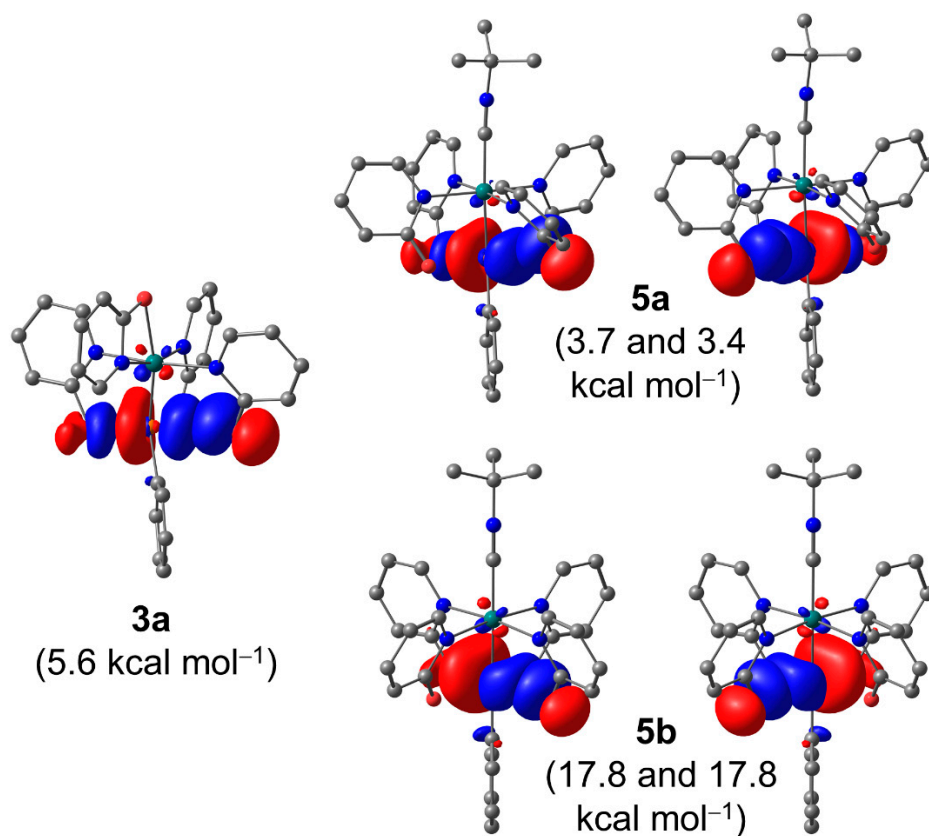

**Figure S33.** Graphical representation of main NBOs (isosurface 0.05 au) involved in  $\sigma$ -O $\rightarrow$ P donor-acceptor interactions in compound **3a**, compound **5a** and compound **5b** and energies of the donor-acceptor interaction as derived from second order perturbation theory analysis. Hydrogen atoms are omitted for clarity.



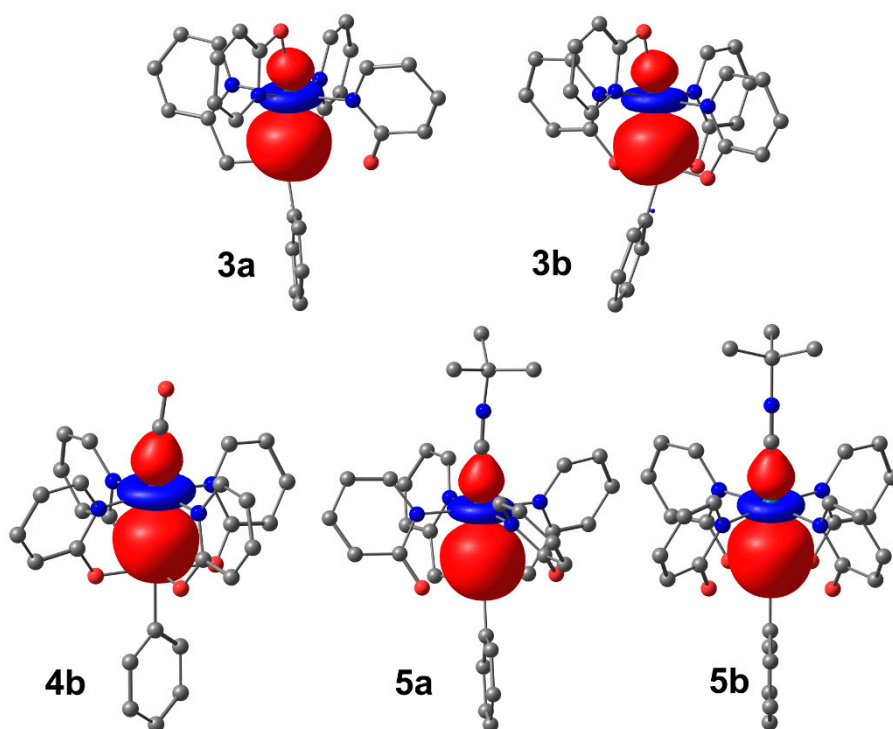

**Figure S34.** Graphical representation of NLMOs (isosurface 0.05 au) representative of the  $\sigma$ -Ru–P bonds in compounds **3a**, **3b**, **4b**, **5a** and **5b**. Hydrogen atoms are omitted for clarity.

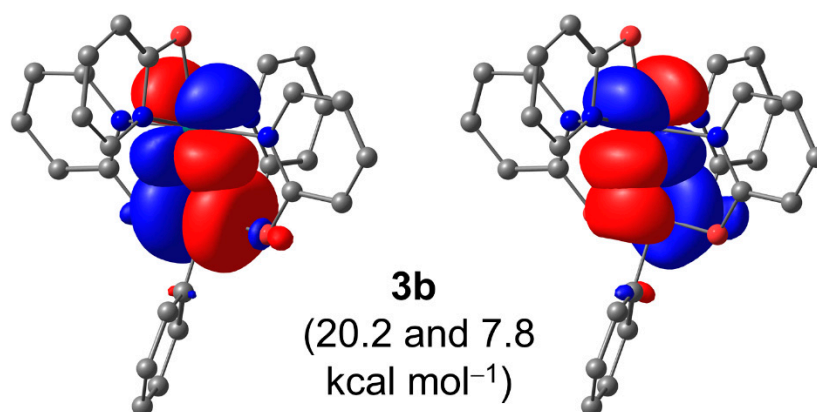

**Figure S35.** Graphical representation of NBOs (isosurface 0.05 au) involved in the predominant  $\pi$ -Ru $\rightarrow$ P donor-acceptor interactions in compound **3b** and energies of the donor-acceptor interactions as derived from second order perturbation theory analysis. Hydrogen atoms are omitted for clarity.

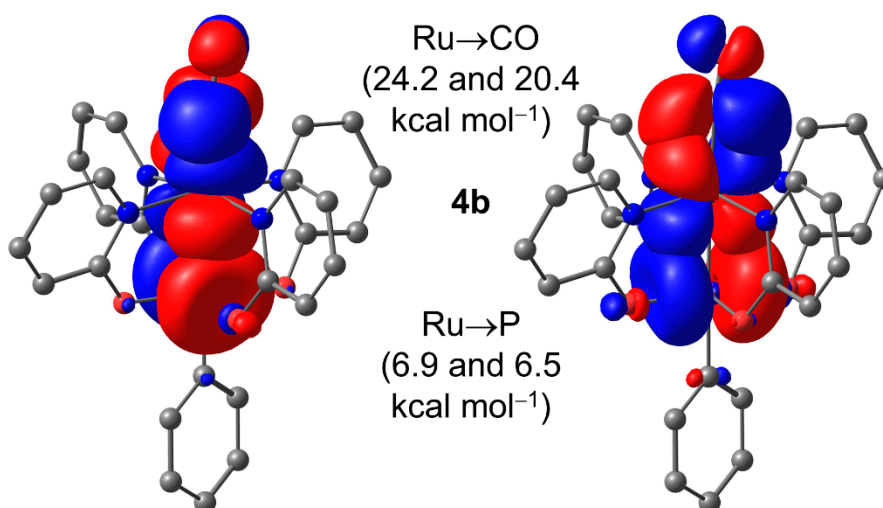

**Figure S36.** Graphical representation of NBOs (isosurface 0.05 au) involved in the predominant  $\pi$ -Ru $\rightarrow$ CO and  $\pi$ -Ru $\rightarrow$ P donor-acceptor interactions in compound **4b** and energies of the donor-acceptor interactions as derived from second order perturbation theory analysis. Hydrogen atoms are omitted for clarity.

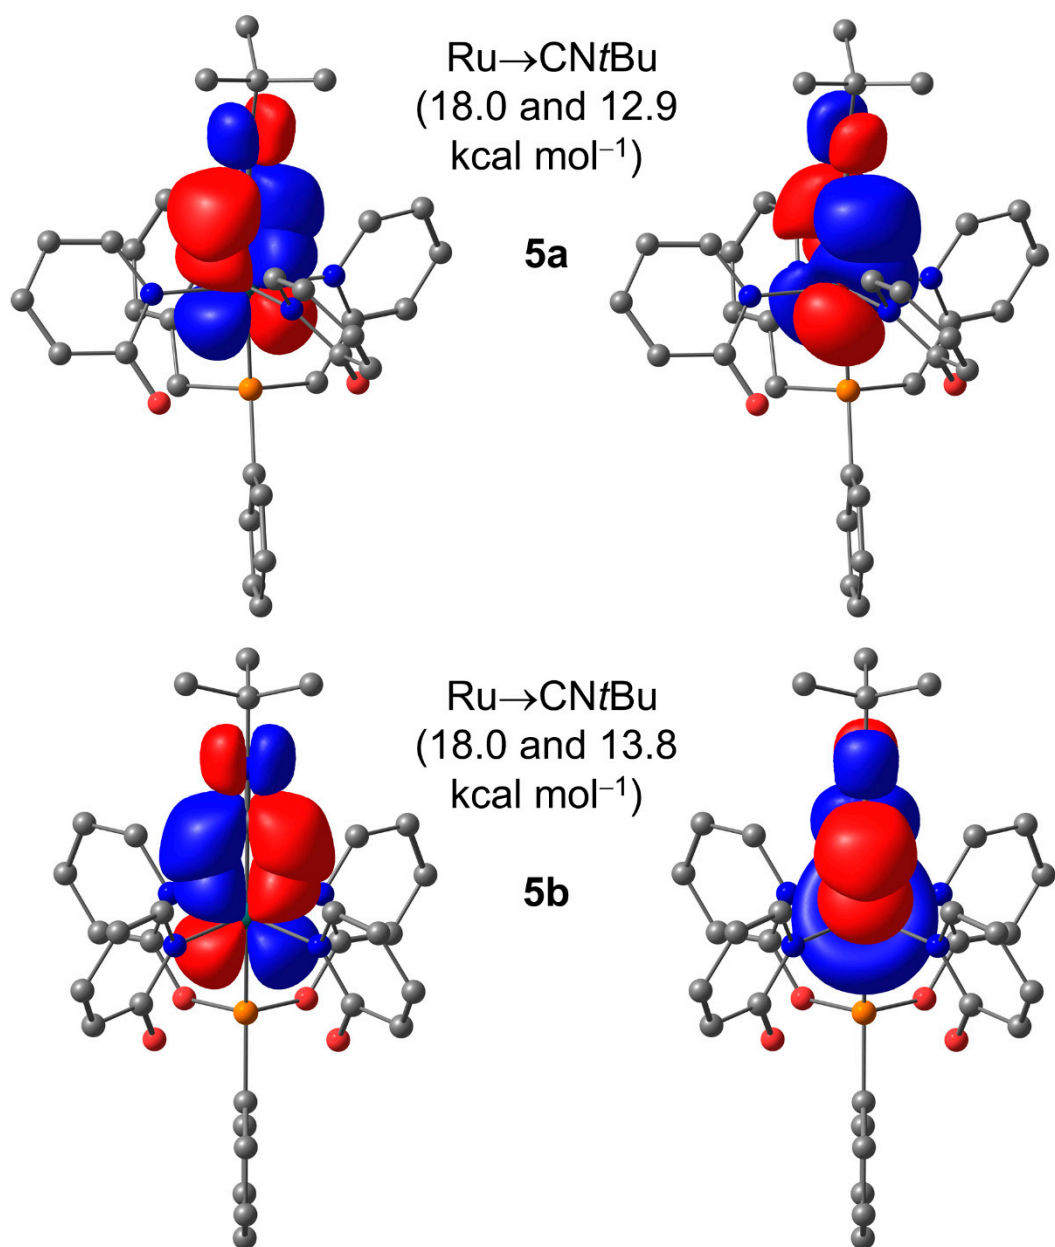

**Figure S37.** Graphical representation of NBOs (isosurface 0.05 au) involved in the predominant  $\pi$ -Ru $\rightarrow$ CN*t*Bu donor-acceptor interactions in compounds **5a** and **5b** and energies of the donor-acceptor interactions as derived from second order perturbation theory analysis. Hydrogen atoms are omitted for clarity.
