# Supplementary material for: P–Ru-Complexes with a Chelate-Bridge-Switch: A Comparison of 2-Picolyl and 2-Pyridyloxy Moieties as Bridging Ligands
Source: Molecules. 2022 Apr 27;27(9):2778. doi: 10.3390/molecules27092778 (PMC9103559; doi:10.3390/molecules27092778)
Supplement: Supplementary file 1 [file molecules-27-02778-s001.zip › EhrlichGerickeBrendlerWagler_all-in-one.cif]

 
data_compound_3a

 
_audit_creation_method            'SHELXL-2014/7'
_shelx_SHELXL_version_number      '2014/7'
_chemical_name_systematic         ?
_chemical_name_common             ?
_chemical_melting_point           ?
_chemical_formula_moiety         'C28 H25 N4 O2 P Ru' 
_chemical_formula_sum
 'C28 H25 N4 O2 P Ru' 
_chemical_formula_weight          581.56

loop_
 _atom_type_symbol
 _atom_type_description
 _atom_type_scat_dispersion_real
 _atom_type_scat_dispersion_imag
 _atom_type_scat_source
 'C'  'C'   0.0033   0.0016
 'International Tables Vol C Tables 4.2.6.8 and 6.1.1.4'
 'H'  'H'   0.0000   0.0000
 'International Tables Vol C Tables 4.2.6.8 and 6.1.1.4'
 'N'  'N'   0.0061   0.0033
 'International Tables Vol C Tables 4.2.6.8 and 6.1.1.4'
 'O'  'O'   0.0106   0.0060
 'International Tables Vol C Tables 4.2.6.8 and 6.1.1.4'
 'P'  'P'   0.1023   0.0942
 'International Tables Vol C Tables 4.2.6.8 and 6.1.1.4'
 'Ru'  'Ru'  -1.2594   0.8363
 'International Tables Vol C Tables 4.2.6.8 and 6.1.1.4'
 
_space_group_crystal_system       orthorhombic
_space_group_IT_number            33
_space_group_name_H-M_alt         'P n a 21'
_space_group_name_Hall            'P 2c -2n'
 
_shelx_space_group_comment
;
The symmetry employed for this shelxl refinement is uniquely defined
by the following loop, which should always be used as a source of
symmetry information in preference to the above space-group names.
They are only intended as comments.
;
 
loop_
 _space_group_symop_operation_xyz
 'x, y, z'
 '-x, -y, z+1/2'
 'x+1/2, -y+1/2, z'
 '-x+1/2, y+1/2, z+1/2'
 
_cell_length_a                    13.6790(5)
_cell_length_b                    22.5495(7)
_cell_length_c                    15.7935(5)
_cell_angle_alpha                 90
_cell_angle_beta                  90
_cell_angle_gamma                 90
_cell_volume                      4871.6(3)
_cell_formula_units_Z             8
_cell_measurement_temperature     130(2)
_cell_measurement_reflns_used    52872
_cell_measurement_theta_min      2.58
_cell_measurement_theta_max      30.28
 
_exptl_crystal_description        piece
_exptl_crystal_colour             orange
_exptl_crystal_density_meas       ?
_exptl_crystal_density_method     ?
_exptl_crystal_density_diffrn     1.586          
_exptl_crystal_F_000              2368
_exptl_transmission_factor_min    ?
_exptl_transmission_factor_max    ?
_exptl_crystal_size_max           0.140
_exptl_crystal_size_mid           0.120
_exptl_crystal_size_min           0.060
_exptl_absorpt_coefficient_mu     0.744
_shelx_estimated_absorpt_T_min    0.903
_shelx_estimated_absorpt_T_max    0.957
_exptl_absorpt_correction_type   integration
_exptl_absorpt_correction_T_min  0.8943
_exptl_absorpt_correction_T_max  0.9477
_exptl_absorpt_process_details    XShape
_exptl_absorpt_special_details    ?
_diffrn_ambient_temperature       130(2)
_diffrn_radiation_wavelength      0.71073
_diffrn_radiation_type            MoK\a
_diffrn_source                    ?
_diffrn_measurement_device_type   'Stoe IPDS-2T'
_diffrn_measurement_method        'omega scans'
_diffrn_detector_area_resol_mean  ?
_diffrn_reflns_number             77123
_diffrn_reflns_av_unetI/netI      0.0435
_diffrn_reflns_av_R_equivalents   0.0771
_diffrn_reflns_limit_h_min        -18
_diffrn_reflns_limit_h_max        18
_diffrn_reflns_limit_k_min        -27
_diffrn_reflns_limit_k_max        29
_diffrn_reflns_limit_l_min        -20
_diffrn_reflns_limit_l_max        20
_diffrn_reflns_theta_min          2.579
_diffrn_reflns_theta_max          27.999
_diffrn_reflns_theta_full         25.242
_diffrn_measured_fraction_theta_max   0.999
_diffrn_measured_fraction_theta_full  0.999
_diffrn_reflns_Laue_measured_fraction_max    0.999
_diffrn_reflns_Laue_measured_fraction_full   0.999
_diffrn_reflns_point_group_measured_fraction_max   0.999
_diffrn_reflns_point_group_measured_fraction_full  0.999
_reflns_number_total              11761
_reflns_number_gt                 9028
_reflns_threshold_expression      'I > 2\s(I)'
_reflns_Friedel_coverage          0.931
_reflns_Friedel_fraction_max      1.000
_reflns_Friedel_fraction_full     1.000
 
_reflns_special_details
;
 Reflections were merged by SHELXL according to the crystal
 class for the calculation of statistics and refinement.
 
 _reflns_Friedel_fraction is defined as the number of unique
 Friedel pairs measured divided by the number that would be
 possible theoretically, ignoring centric projections and
 systematic absences.
;
 
_computing_data_collection        ?
_computing_cell_refinement        ?
_computing_data_reduction         ?
_computing_structure_solution     ?
_computing_structure_refinement 'SHELXL-2014/7 (Sheldrick, 2014)'
_computing_molecular_graphics     ?
_computing_publication_material   ?
_refine_special_details
;
 Refined as a 2-component inversion twin.
;
_refine_ls_structure_factor_coef  Fsqd
_refine_ls_matrix_type            full
_refine_ls_weighting_scheme       calc
_refine_ls_weighting_details
'w=1/[\s^2^(Fo^2^)+(0.0328P)^2^+0.3656P] where P=(Fo^2^+2Fc^2^)/3'
_atom_sites_solution_primary      direct
_atom_sites_solution_secondary    ?
_atom_sites_solution_hydrogens    geom
_refine_ls_hydrogen_treatment     constr
_refine_ls_extinction_method      none
_refine_ls_extinction_coef        .
_refine_ls_abs_structure_details
;
 Refined as an inversion twin.
;
_refine_ls_abs_structure_Flack    0.30(3)
_chemical_absolute_configuration  ?
_refine_ls_number_reflns          11761
_refine_ls_number_parameters      650
_refine_ls_number_restraints      1
_refine_ls_R_factor_all           0.0568
_refine_ls_R_factor_gt            0.0342
_refine_ls_wR_factor_ref          0.0705
_refine_ls_wR_factor_gt           0.0645
_refine_ls_goodness_of_fit_ref    1.018
_refine_ls_restrained_S_all       1.018
_refine_ls_shift/su_max           0.001
_refine_ls_shift/su_mean          0.000
 
loop_
 _atom_site_label
 _atom_site_type_symbol
 _atom_site_fract_x
 _atom_site_fract_y
 _atom_site_fract_z
 _atom_site_U_iso_or_equiv
 _atom_site_adp_type
 _atom_site_occupancy
 _atom_site_site_symmetry_order  
 _atom_site_calc_flag
 _atom_site_refinement_flags_posn
 _atom_site_refinement_flags_adp
 _atom_site_refinement_flags_occupancy
 _atom_site_disorder_assembly
 _atom_site_disorder_group
Ru1 Ru 0.47604(2) 0.35435(2) 0.49793(4) 0.01350(8) Uani 1 1 d . . . . .
P1 P 0.54646(7) 0.26721(5) 0.49559(16) 0.0167(2) Uani 1 1 d . . . . .
O1 O 0.4038(2) 0.44175(16) 0.5355(2) 0.0182(7) Uani 1 1 d . . . . .
O2 O 0.4357(3) 0.25856(18) 0.3476(3) 0.0280(9) Uani 1 1 d . . . . .
N1 N 0.3729(5) 0.3539(3) 0.5943(4) 0.0142(13) Uani 1 1 d . . . . .
N2 N 0.3704(5) 0.3452(3) 0.4002(4) 0.0192(14) Uani 1 1 d . . . . .
N3 N 0.5853(4) 0.3732(3) 0.5857(4) 0.0152(13) Uani 1 1 d . . . . .
N4 N 0.5833(4) 0.3745(3) 0.4101(4) 0.0168(14) Uani 1 1 d . . . . .
C1 C 0.3545(4) 0.4132(2) 0.5935(3) 0.0185(11) Uani 1 1 d . . . . .
C2 C 0.2881(4) 0.4371(3) 0.6527(4) 0.0218(11) Uani 1 1 d . . . . .
H2 H 0.2696 0.4776 0.6500 0.026 Uiso 1 1 calc R U . . .
C3 C 0.2506(4) 0.4006(3) 0.7143(4) 0.0230(13) Uani 1 1 d . . . . .
H3 H 0.2076 0.4165 0.7557 0.028 Uiso 1 1 calc R U . . .
C4 C 0.2753(5) 0.3401(4) 0.7170(4) 0.0249(15) Uani 1 1 d . . . . .
H4 H 0.2512 0.3149 0.7604 0.030 Uiso 1 1 calc R U . . .
C5 C 0.3352(4) 0.3190(3) 0.6546(4) 0.0221(12) Uani 1 1 d . . . . .
H5 H 0.3508 0.2779 0.6540 0.026 Uiso 1 1 calc R U . . .
C6 C 0.3743(4) 0.3002(3) 0.3411(4) 0.0210(12) Uani 1 1 d . . . . .
C7 C 0.3074(4) 0.3031(3) 0.2699(4) 0.0253(12) Uani 1 1 d . . . . .
H7 H 0.3067 0.2717 0.2298 0.030 Uiso 1 1 calc R U . . .
C8 C 0.2461(5) 0.3494(4) 0.2596(4) 0.0272(16) Uani 1 1 d . . . . .
H8 H 0.2041 0.3508 0.2117 0.033 Uiso 1 1 calc R U . . .
C9 C 0.2440(5) 0.3954(4) 0.3188(5) 0.0329(16) Uani 1 1 d . . . . .
H9 H 0.2016 0.4284 0.3122 0.039 Uiso 1 1 calc R U . . .
C10 C 0.3063(4) 0.3909(3) 0.3877(4) 0.0265(12) Uani 1 1 d . . . . .
H10 H 0.3044 0.4216 0.4289 0.032 Uiso 1 1 calc R U . . .
C11 C 0.6154(5) 0.2682(3) 0.5969(5) 0.0221(15) Uani 1 1 d . . . . .
H11A H 0.5749 0.2506 0.6423 0.027 Uiso 1 1 calc R U . . .
H11B H 0.6755 0.2441 0.5911 0.027 Uiso 1 1 calc R U . . .
C12 C 0.6423(5) 0.3307(4) 0.6202(4) 0.0183(15) Uani 1 1 d . . . . .
C13 C 0.7199(6) 0.3448(4) 0.6725(5) 0.0274(17) Uani 1 1 d . . . . .
H13 H 0.7571 0.3138 0.6976 0.033 Uiso 1 1 calc R U . . .
C14 C 0.7439(6) 0.4025(5) 0.6887(5) 0.0294(19) Uani 1 1 d . . . . .
H14 H 0.7974 0.4120 0.7245 0.035 Uiso 1 1 calc R U . . .
C15 C 0.6881(6) 0.4469(4) 0.6516(5) 0.0262(17) Uani 1 1 d . . . . .
H15 H 0.7037 0.4875 0.6604 0.031 Uiso 1 1 calc R U . . .
C16 C 0.6093(5) 0.4307(4) 0.6015(5) 0.0199(15) Uani 1 1 d . . . . .
H16 H 0.5703 0.4611 0.5771 0.024 Uiso 1 1 calc R U . . .
C17 C 0.6394(5) 0.2706(4) 0.4116(4) 0.0226(15) Uani 1 1 d . . . . .
H17A H 0.7023 0.2548 0.4329 0.027 Uiso 1 1 calc R U . . .
H17B H 0.6186 0.2461 0.3627 0.027 Uiso 1 1 calc R U . . .
C18 C 0.6518(5) 0.3336(4) 0.3846(5) 0.0185(14) Uani 1 1 d . . . . .
C19 C 0.7314(5) 0.3519(4) 0.3341(5) 0.0224(16) Uani 1 1 d . . . . .
H19 H 0.7786 0.3237 0.3160 0.027 Uiso 1 1 calc R U . . .
C20 C 0.7406(6) 0.4107(4) 0.3111(5) 0.0264(18) Uani 1 1 d . . . . .
H20 H 0.7937 0.4233 0.2767 0.032 Uiso 1 1 calc R U . . .
C21 C 0.6715(6) 0.4509(4) 0.3388(5) 0.0256(16) Uani 1 1 d . . . . .
H21 H 0.6770 0.4917 0.3244 0.031 Uiso 1 1 calc R U . . .
C22 C 0.5952(5) 0.4314(4) 0.3871(5) 0.0201(15) Uani 1 1 d . . . . .
H22 H 0.5480 0.4596 0.4054 0.024 Uiso 1 1 calc R U . . .
C23 C 0.5067(3) 0.19011(18) 0.4959(6) 0.0207(8) Uani 1 1 d . . . . .
C24 C 0.4082(3) 0.1748(2) 0.5003(6) 0.0241(9) Uani 1 1 d . . . . .
H24 H 0.3599 0.2051 0.5006 0.029 Uiso 1 1 calc R U . . .
C25 C 0.3799(4) 0.1158(2) 0.5041(6) 0.0298(13) Uani 1 1 d . . . . .
H25 H 0.3125 0.1058 0.5070 0.036 Uiso 1 1 calc R U . . .
C26 C 0.4506(4) 0.0714(2) 0.5038(7) 0.0336(13) Uani 1 1 d . . . . .
H26 H 0.4315 0.0309 0.5059 0.040 Uiso 1 1 calc R U . . .
C27 C 0.5487(4) 0.0861(2) 0.5003(8) 0.0386(13) Uani 1 1 d . . . . .
H27 H 0.5970 0.0559 0.5010 0.046 Uiso 1 1 calc R U . . .
C28 C 0.5761(3) 0.1449(2) 0.4958(8) 0.0307(11) Uani 1 1 d . . . . .
H28 H 0.6435 0.1548 0.4925 0.037 Uiso 1 1 calc R U . . .
Ru2 Ru 0.23497(2) 0.63958(2) 0.49553(5) 0.01439(8) Uani 1 1 d . . . . .
P2 P 0.29262(8) 0.72999(5) 0.48734(13) 0.0176(3) Uani 1 1 d . . . . .
O3 O 0.1818(2) 0.54881(16) 0.5334(2) 0.0202(7) Uani 1 1 d . . . . .
O4 O 0.1841(3) 0.72939(19) 0.3430(3) 0.0293(9) Uani 1 1 d . . . . .
N5 N 0.1317(5) 0.6336(3) 0.5916(4) 0.0162(13) Uani 1 1 d . . . . .
N6 N 0.1276(5) 0.6412(3) 0.3989(4) 0.0199(15) Uani 1 1 d . . . . .
N7 N 0.3468(5) 0.6302(3) 0.5842(4) 0.0155(12) Uani 1 1 d . . . . .
N8 N 0.3414(4) 0.6233(3) 0.4061(4) 0.0188(13) Uani 1 1 d . . . . .
C29 C 0.1265(4) 0.5724(3) 0.5917(3) 0.0201(11) Uani 1 1 d . . . . .
C30 C 0.0662(4) 0.5429(3) 0.6499(4) 0.0235(11) Uani 1 1 d . . . . .
H30 H 0.0601 0.5010 0.6489 0.028 Uiso 1 1 calc R U . . .
C31 C 0.0160(5) 0.5762(3) 0.7087(4) 0.0292(15) Uani 1 1 d . . . . .
H31 H -0.0253 0.5570 0.7484 0.035 Uiso 1 1 calc R U . . .
C32 C 0.0250(5) 0.6380(4) 0.7106(4) 0.0299(17) Uani 1 1 d . . . . .
H32 H -0.0078 0.6610 0.7523 0.036 Uiso 1 1 calc R U . . .
C33 C 0.0829(4) 0.6644(3) 0.6501(4) 0.0229(12) Uani 1 1 d . . . . .
H33 H 0.0884 0.7064 0.6500 0.027 Uiso 1 1 calc R U . . .
C34 C 0.1248(4) 0.6865(3) 0.3395(3) 0.0211(11) Uani 1 1 d . . . . .
C35 C 0.0557(4) 0.6810(3) 0.2710(4) 0.0251(12) Uani 1 1 d . . . . .
H35 H 0.0504 0.7123 0.2311 0.030 Uiso 1 1 calc R U . . .
C36 C -0.0017(5) 0.6326(3) 0.2617(4) 0.0269(15) Uani 1 1 d . . . . .
H36 H -0.0453 0.6298 0.2151 0.032 Uiso 1 1 calc R U . . .
C37 C 0.0033(5) 0.5869(3) 0.3211(4) 0.0302(15) Uani 1 1 d . . . . .
H37 H -0.0357 0.5522 0.3155 0.036 Uiso 1 1 calc R U . . .
C38 C 0.0673(4) 0.5939(3) 0.3885(4) 0.0248(12) Uani 1 1 d . . . . .
H38 H 0.0690 0.5636 0.4302 0.030 Uiso 1 1 calc R U . . .
C39 C 0.3579(5) 0.7374(3) 0.5892(4) 0.0209(14) Uani 1 1 d . . . . .
H39A H 0.4149 0.7639 0.5821 0.025 Uiso 1 1 calc R U . . .
H39B H 0.3138 0.7552 0.6319 0.025 Uiso 1 1 calc R U . . .
C40 C 0.3917(5) 0.6777(4) 0.6194(4) 0.0201(16) Uani 1 1 d . . . . .
C41 C 0.4659(5) 0.6704(3) 0.6793(4) 0.0221(15) Uani 1 1 d . . . . .
H41 H 0.4949 0.7041 0.7052 0.027 Uiso 1 1 calc R U . . .
C42 C 0.4971(5) 0.6139(3) 0.7007(4) 0.0227(15) Uani 1 1 d . . . . .
H42 H 0.5463 0.6083 0.7424 0.027 Uiso 1 1 calc R U . . .
C43 C 0.4555(5) 0.5661(3) 0.6602(4) 0.0203(14) Uani 1 1 d . . . . .
H43 H 0.4780 0.5270 0.6714 0.024 Uiso 1 1 calc R U . . .
C44 C 0.3806(5) 0.5755(3) 0.6029(4) 0.0213(15) Uani 1 1 d . . . . .
H44 H 0.3518 0.5422 0.5758 0.026 Uiso 1 1 calc R U . . .
C45 C 0.3884(5) 0.7283(3) 0.4050(4) 0.0221(15) Uani 1 1 d . . . . .
H45A H 0.3681 0.7529 0.3561 0.027 Uiso 1 1 calc R U . . .
H45B H 0.4500 0.7448 0.4279 0.027 Uiso 1 1 calc R U . . .
C46 C 0.4041(5) 0.6660(4) 0.3772(4) 0.0198(15) Uani 1 1 d . . . . .
C47 C 0.4819(5) 0.6493(4) 0.3236(4) 0.0280(17) Uani 1 1 d . . . . .
H47 H 0.5263 0.6785 0.3036 0.034 Uiso 1 1 calc R U . . .
C48 C 0.4939(5) 0.5912(4) 0.3001(4) 0.0277(17) Uani 1 1 d . . . . .
H48 H 0.5465 0.5802 0.2641 0.033 Uiso 1 1 calc R U . . .
C49 C 0.4302(5) 0.5492(3) 0.3286(4) 0.0258(15) Uani 1 1 d . . . . .
H49 H 0.4373 0.5089 0.3124 0.031 Uiso 1 1 calc R U . . .
C50 C 0.3547(5) 0.5664(3) 0.3819(4) 0.0202(14) Uani 1 1 d . . . . .
H50 H 0.3106 0.5371 0.4021 0.024 Uiso 1 1 calc R U . . .
C51 C 0.2433(4) 0.8050(2) 0.4816(4) 0.0205(13) Uani 1 1 d . . . . .
C52 C 0.1461(3) 0.8159(2) 0.4997(6) 0.0232(9) Uani 1 1 d . . . . .
H52 H 0.1032 0.7837 0.5106 0.028 Uiso 1 1 calc R U . . .
C53 C 0.1106(3) 0.8733(2) 0.5020(6) 0.0278(11) Uani 1 1 d . . . . .
H53 H 0.0435 0.8802 0.5142 0.033 Uiso 1 1 calc R U . . .
C54 C 0.1717(4) 0.9204(3) 0.4868(6) 0.0351(16) Uani 1 1 d . . . . .
H54 H 0.1474 0.9598 0.4900 0.042 Uiso 1 1 calc R U . . .
C55 C 0.2694(5) 0.9103(3) 0.4668(5) 0.0427(18) Uani 1 1 d . . . . .
H55 H 0.3112 0.9427 0.4540 0.051 Uiso 1 1 calc R U . . .
C56 C 0.3055(4) 0.8529(3) 0.4655(4) 0.0343(15) Uani 1 1 d . . . . .
H56 H 0.3726 0.8461 0.4537 0.041 Uiso 1 1 calc R U . . .
 
loop_
 _atom_site_aniso_label
 _atom_site_aniso_U_11
 _atom_site_aniso_U_22
 _atom_site_aniso_U_33
 _atom_site_aniso_U_23
 _atom_site_aniso_U_13
 _atom_site_aniso_U_12
Ru1 0.01274(14) 0.01285(15) 0.01491(15) -0.0002(3) 0.0002(3) 0.00062(11)
P1 0.0160(4) 0.0124(5) 0.0218(5) -0.0022(10) 0.0022(9) 0.0010(3)
O1 0.0193(16) 0.0144(18) 0.0208(17) 0.0039(14) 0.0010(14) 0.0006(13)
O2 0.036(2) 0.022(2) 0.027(2) -0.0044(17) -0.0039(18) 0.0051(17)
N1 0.014(3) 0.014(3) 0.014(3) 0.001(2) 0.001(2) -0.001(2)
N2 0.012(3) 0.024(3) 0.022(3) 0.004(2) 0.000(2) 0.000(2)
N3 0.013(3) 0.017(3) 0.015(3) -0.002(3) 0.001(2) -0.002(3)
N4 0.015(3) 0.022(4) 0.014(3) -0.004(3) 0.001(2) 0.001(3)
C1 0.018(3) 0.020(3) 0.018(3) -0.002(2) -0.002(2) 0.000(2)
C2 0.019(2) 0.020(3) 0.026(3) 0.000(2) -0.001(2) 0.002(2)
C3 0.016(3) 0.029(3) 0.024(3) -0.004(3) 0.003(2) -0.003(2)
C4 0.024(3) 0.031(4) 0.019(3) 0.004(3) 0.003(3) -0.007(3)
C5 0.018(3) 0.019(3) 0.029(3) 0.001(2) 0.001(2) -0.002(2)
C6 0.023(3) 0.019(3) 0.021(3) -0.001(2) 0.002(2) -0.006(2)
C7 0.027(3) 0.025(3) 0.024(3) -0.005(2) 0.001(2) -0.004(2)
C8 0.024(3) 0.037(4) 0.021(3) -0.005(3) -0.004(2) -0.002(3)
C9 0.024(3) 0.041(4) 0.034(4) 0.000(3) -0.005(3) 0.010(3)
C10 0.022(3) 0.030(3) 0.028(3) -0.002(3) 0.000(2) 0.004(2)
C11 0.026(3) 0.015(3) 0.026(3) 0.006(3) -0.003(3) 0.004(2)
C12 0.018(3) 0.022(4) 0.016(3) 0.003(2) 0.002(2) 0.005(3)
C13 0.024(3) 0.036(4) 0.022(3) -0.003(3) 0.001(3) 0.003(3)
C14 0.018(3) 0.045(5) 0.025(4) -0.004(3) -0.002(3) 0.004(3)
C15 0.028(3) 0.028(4) 0.022(3) -0.008(3) 0.001(3) -0.007(3)
C16 0.023(3) 0.020(4) 0.017(3) 0.002(3) 0.003(2) -0.001(3)
C17 0.018(3) 0.025(4) 0.025(3) -0.003(3) 0.006(2) 0.000(2)
C18 0.017(3) 0.019(3) 0.020(3) 0.001(3) 0.004(2) -0.002(3)
C19 0.016(3) 0.027(4) 0.023(3) 0.006(3) 0.010(2) 0.004(3)
C20 0.024(4) 0.029(4) 0.025(3) 0.007(3) 0.006(3) -0.009(3)
C21 0.030(4) 0.019(4) 0.028(4) 0.007(3) -0.001(3) -0.004(3)
C22 0.021(3) 0.018(4) 0.021(3) 0.007(3) 0.000(3) -0.001(3)
C23 0.026(2) 0.0128(19) 0.023(2) 0.000(4) -0.001(4) -0.0012(15)
C24 0.026(2) 0.021(2) 0.025(2) -0.001(4) -0.001(4) -0.0022(16)
C25 0.032(2) 0.027(3) 0.030(3) 0.004(4) 0.001(3) -0.010(2)
C26 0.051(3) 0.013(2) 0.036(4) -0.002(4) -0.001(4) -0.005(2)
C27 0.041(3) 0.021(2) 0.054(4) 0.014(5) -0.001(5) 0.004(2)
C28 0.027(2) 0.019(2) 0.046(3) -0.004(5) 0.014(5) 0.0013(18)
Ru2 0.01406(14) 0.01309(15) 0.01603(15) -0.0001(3) 0.0004(3) -0.00002(11)
P2 0.0162(5) 0.0128(5) 0.0238(9) 0.0025(7) 0.0012(7) 0.0007(4)
O3 0.0208(17) 0.0167(19) 0.0230(17) 0.0009(14) 0.0020(14) -0.0027(14)
O4 0.036(2) 0.023(2) 0.029(2) 0.0067(18) -0.0065(18) -0.0066(18)
N5 0.017(3) 0.020(3) 0.011(3) 0.000(2) 0.000(2) 0.003(2)
N6 0.015(3) 0.019(3) 0.026(3) 0.001(2) -0.002(2) -0.002(2)
N7 0.017(3) 0.015(3) 0.015(3) 0.002(2) 0.000(2) 0.002(2)
N8 0.017(3) 0.023(3) 0.016(3) 0.004(3) 0.000(2) 0.001(2)
C29 0.016(2) 0.024(3) 0.020(3) -0.001(2) -0.004(2) 0.000(2)
C30 0.022(3) 0.023(3) 0.026(3) 0.004(2) -0.003(2) -0.006(2)
C31 0.020(3) 0.040(4) 0.027(3) 0.003(3) 0.007(3) -0.003(3)
C32 0.021(3) 0.047(5) 0.022(3) -0.004(3) 0.007(2) 0.007(3)
C33 0.020(3) 0.023(3) 0.026(3) 0.000(2) -0.001(2) 0.003(2)
C34 0.021(3) 0.020(3) 0.022(3) 0.000(2) 0.002(2) 0.005(2)
C35 0.020(3) 0.032(3) 0.023(3) 0.007(2) -0.001(2) 0.003(2)
C36 0.015(3) 0.038(4) 0.027(3) 0.001(3) -0.004(2) 0.003(3)
C37 0.023(3) 0.036(4) 0.032(4) -0.001(3) -0.007(3) -0.005(3)
C38 0.024(3) 0.022(3) 0.028(3) 0.001(2) -0.004(2) -0.002(2)
C39 0.024(3) 0.011(3) 0.028(3) 0.001(2) 0.003(3) -0.004(2)
C40 0.013(3) 0.027(4) 0.020(3) -0.006(3) -0.003(2) -0.002(2)
C41 0.023(3) 0.026(4) 0.017(3) -0.001(2) -0.002(2) -0.009(3)
C42 0.020(3) 0.027(4) 0.021(3) 0.003(3) -0.005(2) 0.000(3)
C43 0.026(3) 0.016(3) 0.018(3) 0.005(2) 0.000(2) 0.004(2)
C44 0.020(3) 0.022(3) 0.022(3) -0.003(3) 0.003(2) -0.002(2)
C45 0.019(3) 0.026(4) 0.021(3) 0.005(3) 0.005(2) 0.001(3)
C46 0.018(3) 0.024(3) 0.017(3) -0.004(3) -0.002(2) 0.001(2)
C47 0.022(3) 0.038(5) 0.024(3) 0.005(3) 0.006(2) 0.000(3)
C48 0.025(3) 0.039(5) 0.019(3) -0.003(3) 0.001(2) 0.011(3)
C49 0.029(3) 0.026(4) 0.023(3) -0.001(3) -0.003(3) 0.013(3)
C50 0.027(3) 0.019(3) 0.015(3) 0.001(2) 0.001(2) 0.008(3)
C51 0.025(2) 0.015(2) 0.022(4) -0.003(2) -0.001(2) 0.0003(17)
C52 0.0194(18) 0.023(2) 0.027(2) 0.007(4) 0.001(4) 0.0031(16)
C53 0.027(2) 0.033(3) 0.023(3) -0.003(4) 0.002(3) 0.0122(18)
C54 0.046(3) 0.020(2) 0.039(5) -0.001(3) -0.002(4) 0.013(2)
C55 0.046(4) 0.017(3) 0.065(5) 0.001(3) 0.005(3) -0.006(3)
C56 0.031(3) 0.019(3) 0.053(4) 0.006(3) 0.003(2) -0.002(2)
 
_geom_special_details
;
 All esds (except the esd in the dihedral angle between two l.s. planes)
 are estimated using the full covariance matrix.  The cell esds are taken
 into account individually in the estimation of esds in distances, angles
 and torsion angles; correlations between esds in cell parameters are only
 used when they are defined by crystal symmetry.  An approximate (isotropic)
 treatment of cell esds is used for estimating esds involving l.s. planes.
;
 
loop_
 _geom_bond_atom_site_label_1
 _geom_bond_atom_site_label_2
 _geom_bond_distance
 _geom_bond_site_symmetry_2
 _geom_bond_publ_flag
Ru1 N4 2.070(6) . ?
Ru1 N1 2.076(6) . ?
Ru1 N3 2.082(6) . ?
Ru1 N2 2.124(7) . ?
Ru1 P1 2.1887(11) . ?
Ru1 O1 2.283(4) . ?
P1 C23 1.822(4) . ?
P1 C17 1.839(7) . ?
P1 C11 1.857(7) . ?
P1 O2 2.792(5) . ?
O1 C1 1.308(7) . ?
O2 C6 1.265(7) . ?
N1 C5 1.338(8) . ?
N1 C1 1.361(8) . ?
N2 C10 1.367(9) . ?
N2 C6 1.379(9) . ?
N3 C12 1.350(10) . ?
N3 C16 1.360(10) . ?
N4 C22 1.343(11) . ?
N4 C18 1.375(10) . ?
C1 C2 1.409(7) . ?
C2 C3 1.372(8) . ?
C2 H2 0.9500 . ?
C3 C4 1.406(10) . ?
C3 H3 0.9500 . ?
C4 C5 1.368(9) . ?
C4 H4 0.9500 . ?
C5 H5 0.9500 . ?
C6 C7 1.451(8) . ?
C7 C8 1.349(9) . ?
C7 H7 0.9500 . ?
C8 C9 1.397(10) . ?
C8 H8 0.9500 . ?
C9 C10 1.385(9) . ?
C9 H9 0.9500 . ?
C10 H10 0.9500 . ?
C11 C12 1.502(11) . ?
C11 H11A 0.9900 . ?
C11 H11B 0.9900 . ?
C12 C13 1.382(11) . ?
C13 C14 1.366(14) . ?
C13 H13 0.9500 . ?
C14 C15 1.389(12) . ?
C14 H14 0.9500 . ?
C15 C16 1.387(11) . ?
C15 H15 0.9500 . ?
C16 H16 0.9500 . ?
C17 C18 1.495(11) . ?
C17 H17A 0.9900 . ?
C17 H17B 0.9900 . ?
C18 C19 1.411(10) . ?
C19 C20 1.381(12) . ?
C19 H19 0.9500 . ?
C20 C21 1.381(12) . ?
C20 H20 0.9500 . ?
C21 C22 1.366(11) . ?
C21 H21 0.9500 . ?
C22 H22 0.9500 . ?
C23 C24 1.393(6) . ?
C23 C28 1.393(6) . ?
C24 C25 1.387(7) . ?
C24 H24 0.9500 . ?
C25 C26 1.394(8) . ?
C25 H25 0.9500 . ?
C26 C27 1.383(8) . ?
C26 H26 0.9500 . ?
C27 C28 1.380(7) . ?
C27 H27 0.9500 . ?
C28 H28 0.9500 . ?
Ru2 N8 2.061(6) . ?
Ru2 N5 2.078(6) . ?
Ru2 N7 2.084(6) . ?
Ru2 N6 2.119(7) . ?
Ru2 P2 2.1897(12) . ?
Ru2 O3 2.253(4) . ?
P2 C51 1.824(5) . ?
P2 C45 1.846(6) . ?
P2 C39 1.848(7) . ?
P2 O4 2.721(4) . ?
O3 C29 1.305(7) . ?
O4 C34 1.263(7) . ?
N5 C33 1.335(8) . ?
N5 C29 1.383(9) . ?
N6 C38 1.357(9) . ?
N6 C34 1.388(9) . ?
N7 C44 1.351(10) . ?
N7 C40 1.354(10) . ?
N8 C50 1.351(10) . ?
N8 C46 1.368(10) . ?
C29 C30 1.403(8) . ?
C30 C31 1.376(9) . ?
C30 H30 0.9500 . ?
C31 C32 1.399(11) . ?
C31 H31 0.9500 . ?
C32 C33 1.376(9) . ?
C32 H32 0.9500 . ?
C33 H33 0.9500 . ?
C34 C35 1.442(8) . ?
C35 C36 1.352(9) . ?
C35 H35 0.9500 . ?
C36 C37 1.395(10) . ?
C36 H36 0.9500 . ?
C37 C38 1.387(8) . ?
C37 H37 0.9500 . ?
C38 H38 0.9500 . ?
C39 C40 1.502(10) . ?
C39 H39A 0.9900 . ?
C39 H39B 0.9900 . ?
C40 C41 1.397(9) . ?
C41 C42 1.384(10) . ?
C41 H41 0.9500 . ?
C42 C43 1.377(9) . ?
C42 H42 0.9500 . ?
C43 C44 1.382(10) . ?
C43 H43 0.9500 . ?
C44 H44 0.9500 . ?
C45 C46 1.486(10) . ?
C45 H45A 0.9900 . ?
C45 H45B 0.9900 . ?
C46 C47 1.412(10) . ?
C47 C48 1.372(11) . ?
C47 H47 0.9500 . ?
C48 C49 1.363(10) . ?
C48 H48 0.9500 . ?
C49 C50 1.387(10) . ?
C49 H49 0.9500 . ?
C50 H50 0.9500 . ?
C51 C52 1.382(7) . ?
C51 C56 1.399(8) . ?
C52 C53 1.382(7) . ?
C52 H52 0.9500 . ?
C53 C54 1.373(8) . ?
C53 H53 0.9500 . ?
C54 C55 1.392(9) . ?
C54 H54 0.9500 . ?
C55 C56 1.385(9) . ?
C55 H55 0.9500 . ?
C56 H56 0.9500 . ?
 
loop_
 _geom_angle_atom_site_label_1
 _geom_angle_atom_site_label_2
 _geom_angle_atom_site_label_3
 _geom_angle
 _geom_angle_site_symmetry_1
 _geom_angle_site_symmetry_3
 _geom_angle_publ_flag
N4 Ru1 N1 167.0(3) . . ?
N4 Ru1 N3 83.83(12) . . ?
N1 Ru1 N3 90.0(2) . . ?
N4 Ru1 N2 90.9(2) . . ?
N1 Ru1 N2 94.02(13) . . ?
N3 Ru1 N2 172.6(3) . . ?
N4 Ru1 P1 82.8(2) . . ?
N1 Ru1 P1 107.90(17) . . ?
N3 Ru1 P1 83.04(19) . . ?
N2 Ru1 P1 101.5(2) . . ?
N4 Ru1 O1 106.9(2) . . ?
N1 Ru1 O1 61.28(19) . . ?
N3 Ru1 O1 87.8(2) . . ?
N2 Ru1 O1 88.8(2) . . ?
P1 Ru1 O1 165.90(11) . . ?
C23 P1 C17 104.3(4) . . ?
C23 P1 C11 99.3(4) . . ?
C17 P1 C11 105.7(3) . . ?
C23 P1 Ru1 136.49(14) . . ?
C17 P1 Ru1 106.2(3) . . ?
C11 P1 Ru1 101.4(2) . . ?
C1 O1 Ru1 88.9(3) . . ?
C5 N1 C1 120.9(6) . . ?
C5 N1 Ru1 141.8(5) . . ?
C1 N1 Ru1 96.6(4) . . ?
C10 N2 C6 118.7(6) . . ?
C10 N2 Ru1 117.9(5) . . ?
C6 N2 Ru1 122.5(5) . . ?
C12 N3 C16 117.6(6) . . ?
C12 N3 Ru1 122.5(5) . . ?
C16 N3 Ru1 119.4(5) . . ?
C22 N4 C18 118.6(6) . . ?
C22 N4 Ru1 118.5(5) . . ?
C18 N4 Ru1 122.1(5) . . ?
O1 C1 N1 113.2(5) . . ?
O1 C1 C2 127.6(5) . . ?
N1 C1 C2 119.2(6) . . ?
C3 C2 C1 118.8(5) . . ?
C3 C2 H2 120.6 . . ?
C1 C2 H2 120.6 . . ?
C2 C3 C4 120.8(6) . . ?
C2 C3 H3 119.6 . . ?
C4 C3 H3 119.6 . . ?
C5 C4 C3 117.4(6) . . ?
C5 C4 H4 121.3 . . ?
C3 C4 H4 121.3 . . ?
N1 C5 C4 122.5(6) . . ?
N1 C5 H5 118.7 . . ?
C4 C5 H5 118.7 . . ?
O2 C6 N2 121.1(6) . . ?
O2 C6 C7 121.0(5) . . ?
N2 C6 C7 117.9(6) . . ?
C8 C7 C6 121.4(6) . . ?
C8 C7 H7 119.3 . . ?
C6 C7 H7 119.3 . . ?
C7 C8 C9 120.4(6) . . ?
C7 C8 H8 119.8 . . ?
C9 C8 H8 119.8 . . ?
C10 C9 C8 117.3(6) . . ?
C10 C9 H9 121.3 . . ?
C8 C9 H9 121.3 . . ?
N2 C10 C9 124.3(6) . . ?
N2 C10 H10 117.9 . . ?
C9 C10 H10 117.9 . . ?
C12 C11 P1 110.3(5) . . ?
C12 C11 H11A 109.6 . . ?
P1 C11 H11A 109.6 . . ?
C12 C11 H11B 109.6 . . ?
P1 C11 H11B 109.6 . . ?
H11A C11 H11B 108.1 . . ?
N3 C12 C13 121.5(8) . . ?
N3 C12 C11 115.2(6) . . ?
C13 C12 C11 123.4(7) . . ?
C14 C13 C12 121.0(8) . . ?
C14 C13 H13 119.5 . . ?
C12 C13 H13 119.5 . . ?
C13 C14 C15 118.5(8) . . ?
C13 C14 H14 120.8 . . ?
C15 C14 H14 120.8 . . ?
C16 C15 C14 118.5(8) . . ?
C16 C15 H15 120.8 . . ?
C14 C15 H15 120.8 . . ?
N3 C16 C15 123.0(7) . . ?
N3 C16 H16 118.5 . . ?
C15 C16 H16 118.5 . . ?
C18 C17 P1 108.9(5) . . ?
C18 C17 H17A 109.9 . . ?
P1 C17 H17A 109.9 . . ?
C18 C17 H17B 109.9 . . ?
P1 C17 H17B 109.9 . . ?
H17A C17 H17B 108.3 . . ?
N4 C18 C19 119.7(7) . . ?
N4 C18 C17 118.5(6) . . ?
C19 C18 C17 121.7(7) . . ?
C20 C19 C18 120.0(7) . . ?
C20 C19 H19 120.0 . . ?
C18 C19 H19 120.0 . . ?
C19 C20 C21 119.0(7) . . ?
C19 C20 H20 120.5 . . ?
C21 C20 H20 120.5 . . ?
C22 C21 C20 119.3(8) . . ?
C22 C21 H21 120.3 . . ?
C20 C21 H21 120.3 . . ?
N4 C22 C21 123.4(7) . . ?
N4 C22 H22 118.3 . . ?
C21 C22 H22 118.3 . . ?
C24 C23 C28 118.6(4) . . ?
C24 C23 P1 121.7(3) . . ?
C28 C23 P1 119.6(3) . . ?
C25 C24 C23 120.6(4) . . ?
C25 C24 H24 119.7 . . ?
C23 C24 H24 119.7 . . ?
C24 C25 C26 119.8(5) . . ?
C24 C25 H25 120.1 . . ?
C26 C25 H25 120.1 . . ?
C27 C26 C25 120.0(5) . . ?
C27 C26 H26 120.0 . . ?
C25 C26 H26 120.0 . . ?
C28 C27 C26 119.8(5) . . ?
C28 C27 H27 120.1 . . ?
C26 C27 H27 120.1 . . ?
C27 C28 C23 121.2(4) . . ?
C27 C28 H28 119.4 . . ?
C23 C28 H28 119.4 . . ?
N8 Ru2 N5 165.7(3) . . ?
N8 Ru2 N7 85.61(14) . . ?
N5 Ru2 N7 90.1(3) . . ?
N8 Ru2 N6 90.0(3) . . ?
N5 Ru2 N6 93.20(14) . . ?
N7 Ru2 N6 173.9(3) . . ?
N8 Ru2 P2 82.6(2) . . ?
N5 Ru2 P2 110.38(19) . . ?
N7 Ru2 P2 82.51(19) . . ?
N6 Ru2 P2 101.04(19) . . ?
N8 Ru2 O3 104.4(2) . . ?
N5 Ru2 O3 61.8(2) . . ?
N7 Ru2 O3 88.1(2) . . ?
N6 Ru2 O3 89.0(2) . . ?
P2 Ru2 O3 167.89(12) . . ?
C51 P2 C45 104.3(3) . . ?
C51 P2 C39 97.9(3) . . ?
C45 P2 C39 105.8(3) . . ?
C51 P2 Ru2 137.15(16) . . ?
C45 P2 Ru2 106.1(2) . . ?
C39 P2 Ru2 101.9(2) . . ?
C29 O3 Ru2 90.3(3) . . ?
C33 N5 C29 119.6(6) . . ?
C33 N5 Ru2 144.3(5) . . ?
C29 N5 Ru2 95.8(4) . . ?
C38 N6 C34 118.7(6) . . ?
C38 N6 Ru2 119.7(5) . . ?
C34 N6 Ru2 121.2(5) . . ?
C44 N7 C40 118.5(6) . . ?
C44 N7 Ru2 119.4(5) . . ?
C40 N7 Ru2 122.0(5) . . ?
C50 N8 C46 119.4(6) . . ?
C50 N8 Ru2 117.2(5) . . ?
C46 N8 Ru2 123.1(5) . . ?
O3 C29 N5 112.1(5) . . ?
O3 C29 C30 127.7(5) . . ?
N5 C29 C30 120.2(5) . . ?
C31 C30 C29 118.5(6) . . ?
C31 C30 H30 120.8 . . ?
C29 C30 H30 120.8 . . ?
C30 C31 C32 120.9(6) . . ?
C30 C31 H31 119.5 . . ?
C32 C31 H31 119.5 . . ?
C33 C32 C31 117.8(6) . . ?
C33 C32 H32 121.1 . . ?
C31 C32 H32 121.1 . . ?
N5 C33 C32 122.9(7) . . ?
N5 C33 H33 118.6 . . ?
C32 C33 H33 118.6 . . ?
O4 C34 N6 121.2(5) . . ?
O4 C34 C35 121.3(5) . . ?
N6 C34 C35 117.5(6) . . ?
C36 C35 C34 122.1(6) . . ?
C36 C35 H35 118.9 . . ?
C34 C35 H35 118.9 . . ?
C35 C36 C37 119.7(6) . . ?
C35 C36 H36 120.2 . . ?
C37 C36 H36 120.2 . . ?
C38 C37 C36 117.5(6) . . ?
C38 C37 H37 121.2 . . ?
C36 C37 H37 121.2 . . ?
N6 C38 C37 124.5(6) . . ?
N6 C38 H38 117.8 . . ?
C37 C38 H38 117.8 . . ?
C40 C39 P2 110.2(5) . . ?
C40 C39 H39A 109.6 . . ?
P2 C39 H39A 109.6 . . ?
C40 C39 H39B 109.6 . . ?
P2 C39 H39B 109.6 . . ?
H39A C39 H39B 108.1 . . ?
N7 C40 C41 121.0(7) . . ?
N7 C40 C39 116.0(6) . . ?
C41 C40 C39 123.0(7) . . ?
C42 C41 C40 119.8(7) . . ?
C42 C41 H41 120.1 . . ?
C40 C41 H41 120.1 . . ?
C43 C42 C41 118.6(6) . . ?
C43 C42 H42 120.7 . . ?
C41 C42 H42 120.7 . . ?
C42 C43 C44 119.4(6) . . ?
C42 C43 H43 120.3 . . ?
C44 C43 H43 120.3 . . ?
N7 C44 C43 122.5(7) . . ?
N7 C44 H44 118.8 . . ?
C43 C44 H44 118.8 . . ?
C46 C45 P2 109.3(5) . . ?
C46 C45 H45A 109.8 . . ?
P2 C45 H45A 109.8 . . ?
C46 C45 H45B 109.8 . . ?
P2 C45 H45B 109.8 . . ?
H45A C45 H45B 108.3 . . ?
N8 C46 C47 118.9(7) . . ?
N8 C46 C45 118.4(6) . . ?
C47 C46 C45 122.6(7) . . ?
C48 C47 C46 120.5(7) . . ?
C48 C47 H47 119.7 . . ?
C46 C47 H47 119.7 . . ?
C49 C48 C47 119.8(7) . . ?
C49 C48 H48 120.1 . . ?
C47 C48 H48 120.1 . . ?
C48 C49 C50 118.8(7) . . ?
C48 C49 H49 120.6 . . ?
C50 C49 H49 120.6 . . ?
N8 C50 C49 122.5(7) . . ?
N8 C50 H50 118.8 . . ?
C49 C50 H50 118.8 . . ?
C52 C51 C56 119.0(5) . . ?
C52 C51 P2 120.8(4) . . ?
C56 C51 P2 120.0(4) . . ?
C53 C52 C51 120.7(5) . . ?
C53 C52 H52 119.7 . . ?
C51 C52 H52 119.7 . . ?
C54 C53 C52 120.4(5) . . ?
C54 C53 H53 119.8 . . ?
C52 C53 H53 119.8 . . ?
C53 C54 C55 119.9(5) . . ?
C53 C54 H54 120.1 . . ?
C55 C54 H54 120.1 . . ?
C56 C55 C54 119.9(6) . . ?
C56 C55 H55 120.1 . . ?
C54 C55 H55 120.1 . . ?
C55 C56 C51 120.1(6) . . ?
C55 C56 H56 119.9 . . ?
C51 C56 H56 119.9 . . ?
 
loop_
 _geom_torsion_atom_site_label_1
 _geom_torsion_atom_site_label_2
 _geom_torsion_atom_site_label_3
 _geom_torsion_atom_site_label_4
 _geom_torsion
 _geom_torsion_site_symmetry_1
 _geom_torsion_site_symmetry_2
 _geom_torsion_site_symmetry_3
 _geom_torsion_site_symmetry_4
 _geom_torsion_publ_flag
Ru1 O1 C1 N1 -1.5(5) . . . . ?
Ru1 O1 C1 C2 177.9(5) . . . . ?
C5 N1 C1 O1 174.0(5) . . . . ?
Ru1 N1 C1 O1 1.7(5) . . . . ?
C5 N1 C1 C2 -5.6(9) . . . . ?
Ru1 N1 C1 C2 -177.8(4) . . . . ?
O1 C1 C2 C3 -173.6(5) . . . . ?
N1 C1 C2 C3 5.8(8) . . . . ?
C1 C2 C3 C4 -2.1(9) . . . . ?
C2 C3 C4 C5 -1.9(9) . . . . ?
C1 N1 C5 C4 1.4(10) . . . . ?
Ru1 N1 C5 C4 168.9(6) . . . . ?
C3 C4 C5 N1 2.4(10) . . . . ?
C10 N2 C6 O2 176.4(6) . . . . ?
Ru1 N2 C6 O2 7.4(8) . . . . ?
C10 N2 C6 C7 -2.0(9) . . . . ?
Ru1 N2 C6 C7 -171.0(4) . . . . ?
O2 C6 C7 C8 -175.6(6) . . . . ?
N2 C6 C7 C8 2.8(9) . . . . ?
C6 C7 C8 C9 -1.5(10) . . . . ?
C7 C8 C9 C10 -0.5(10) . . . . ?
C6 N2 C10 C9 0.0(10) . . . . ?
Ru1 N2 C10 C9 169.5(5) . . . . ?
C8 C9 C10 N2 1.3(10) . . . . ?
C23 P1 C11 C12 -170.1(5) . . . . ?
C17 P1 C11 C12 82.1(5) . . . . ?
Ru1 P1 C11 C12 -28.6(5) . . . . ?
C16 N3 C12 C13 2.7(10) . . . . ?
Ru1 N3 C12 C13 174.2(5) . . . . ?
C16 N3 C12 C11 -177.0(6) . . . . ?
Ru1 N3 C12 C11 -5.4(8) . . . . ?
P1 C11 C12 N3 23.3(8) . . . . ?
P1 C11 C12 C13 -156.3(6) . . . . ?
N3 C12 C13 C14 -2.5(12) . . . . ?
C11 C12 C13 C14 177.1(7) . . . . ?
C12 C13 C14 C15 0.3(12) . . . . ?
C13 C14 C15 C16 1.5(12) . . . . ?
C12 N3 C16 C15 -0.8(10) . . . . ?
Ru1 N3 C16 C15 -172.6(6) . . . . ?
C14 C15 C16 N3 -1.3(11) . . . . ?
C23 P1 C17 C18 160.3(5) . . . . ?
C11 P1 C17 C18 -95.6(5) . . . . ?
Ru1 P1 C17 C18 11.6(5) . . . . ?
C22 N4 C18 C19 -1.1(10) . . . . ?
Ru1 N4 C18 C19 -170.9(5) . . . . ?
C22 N4 C18 C17 178.9(6) . . . . ?
Ru1 N4 C18 C17 9.1(9) . . . . ?
P1 C17 C18 N4 -13.3(8) . . . . ?
P1 C17 C18 C19 166.7(6) . . . . ?
N4 C18 C19 C20 0.5(11) . . . . ?
C17 C18 C19 C20 -179.5(7) . . . . ?
C18 C19 C20 C21 0.5(12) . . . . ?
C19 C20 C21 C22 -1.0(12) . . . . ?
C18 N4 C22 C21 0.7(11) . . . . ?
Ru1 N4 C22 C21 170.9(6) . . . . ?
C20 C21 C22 N4 0.4(12) . . . . ?
C17 P1 C23 C24 -135.2(8) . . . . ?
C11 P1 C23 C24 115.9(8) . . . . ?
Ru1 P1 C23 C24 -1.7(12) . . . . ?
C17 P1 C23 C28 47.9(10) . . . . ?
C11 P1 C23 C28 -61.0(10) . . . . ?
Ru1 P1 C23 C28 -178.6(7) . . . . ?
C28 C23 C24 C25 -0.2(15) . . . . ?
P1 C23 C24 C25 -177.2(8) . . . . ?
C23 C24 C25 C26 0.1(15) . . . . ?
C24 C25 C26 C27 0.5(16) . . . . ?
C25 C26 C27 C28 -1.1(19) . . . . ?
C26 C27 C28 C23 1(2) . . . . ?
C24 C23 C28 C27 -0.3(18) . . . . ?
P1 C23 C28 C27 176.7(10) . . . . ?
Ru2 O3 C29 N5 2.2(4) . . . . ?
Ru2 O3 C29 C30 -178.1(5) . . . . ?
C33 N5 C29 O3 -176.8(5) . . . . ?
Ru2 N5 C29 O3 -2.4(5) . . . . ?
C33 N5 C29 C30 3.4(9) . . . . ?
Ru2 N5 C29 C30 177.8(4) . . . . ?
O3 C29 C30 C31 177.7(5) . . . . ?
N5 C29 C30 C31 -2.6(8) . . . . ?
C29 C30 C31 C32 -0.2(9) . . . . ?
C30 C31 C32 C33 2.2(10) . . . . ?
C29 N5 C33 C32 -1.4(9) . . . . ?
Ru2 N5 C33 C32 -171.9(6) . . . . ?
C31 C32 C33 N5 -1.4(10) . . . . ?
C38 N6 C34 O4 -175.0(6) . . . . ?
Ru2 N6 C34 O4 -2.6(8) . . . . ?
C38 N6 C34 C35 1.4(9) . . . . ?
Ru2 N6 C34 C35 173.8(4) . . . . ?
O4 C34 C35 C36 173.5(6) . . . . ?
N6 C34 C35 C36 -2.9(9) . . . . ?
C34 C35 C36 C37 1.7(10) . . . . ?
C35 C36 C37 C38 0.9(10) . . . . ?
C34 N6 C38 C37 1.2(10) . . . . ?
Ru2 N6 C38 C37 -171.3(5) . . . . ?
C36 C37 C38 N6 -2.4(10) . . . . ?
C51 P2 C39 C40 169.4(5) . . . . ?
C45 P2 C39 C40 -83.2(5) . . . . ?
Ru2 P2 C39 C40 27.6(5) . . . . ?
C44 N7 C40 C41 -5.2(10) . . . . ?
Ru2 N7 C40 C41 179.5(5) . . . . ?
C44 N7 C40 C39 173.8(6) . . . . ?
Ru2 N7 C40 C39 -1.5(9) . . . . ?
P2 C39 C40 N7 -18.5(8) . . . . ?
P2 C39 C40 C41 160.5(5) . . . . ?
N7 C40 C41 C42 2.6(10) . . . . ?
C39 C40 C41 C42 -176.4(6) . . . . ?
C40 C41 C42 C43 1.8(10) . . . . ?
C41 C42 C43 C44 -3.4(10) . . . . ?
C40 N7 C44 C43 3.6(10) . . . . ?
Ru2 N7 C44 C43 179.0(5) . . . . ?
C42 C43 C44 N7 0.7(10) . . . . ?
C51 P2 C45 C46 -155.7(4) . . . . ?
C39 P2 C45 C46 101.6(5) . . . . ?
Ru2 P2 C45 C46 -6.2(5) . . . . ?
C50 N8 C46 C47 -0.8(10) . . . . ?
Ru2 N8 C46 C47 172.6(5) . . . . ?
C50 N8 C46 C45 -179.8(6) . . . . ?
Ru2 N8 C46 C45 -6.4(9) . . . . ?
P2 C45 C46 N8 8.0(8) . . . . ?
P2 C45 C46 C47 -170.9(6) . . . . ?
N8 C46 C47 C48 0.6(10) . . . . ?
C45 C46 C47 C48 179.5(6) . . . . ?
C46 C47 C48 C49 0.1(11) . . . . ?
C47 C48 C49 C50 -0.6(10) . . . . ?
C46 N8 C50 C49 0.3(10) . . . . ?
Ru2 N8 C50 C49 -173.5(5) . . . . ?
C48 C49 C50 N8 0.5(10) . . . . ?
C45 P2 C51 C52 147.9(6) . . . . ?
C39 P2 C51 C52 -103.5(6) . . . . ?
Ru2 P2 C51 C52 13.7(8) . . . . ?
C45 P2 C51 C56 -37.3(6) . . . . ?
C39 P2 C51 C56 71.4(5) . . . . ?
Ru2 P2 C51 C56 -171.5(4) . . . . ?
C56 C51 C52 C53 -0.2(12) . . . . ?
P2 C51 C52 C53 174.7(7) . . . . ?
C51 C52 C53 C54 -0.3(15) . . . . ?
C52 C53 C54 C55 1.7(15) . . . . ?
C53 C54 C55 C56 -2.6(13) . . . . ?
C54 C55 C56 C51 2.1(11) . . . . ?
C52 C51 C56 C55 -0.7(10) . . . . ?
P2 C51 C56 C55 -175.7(5) . . . . ?
 
_refine_diff_density_max    0.622
_refine_diff_density_min   -0.620
_refine_diff_density_rms    0.087

_shelx_res_file
;

    lem008_06.res created by SHELXL-2014/7


TITL LEM008_06
CELL  0.71073   13.6790  22.5495  15.7935   90.000   90.000   90.000
ZERR     8.00    0.0005   0.0007   0.0005    0.000    0.000    0.000
LATT -1
SYMM -X, -Y, 1/2+Z
SYMM 1/2+X, 1/2-Y, Z
SYMM 1/2-X, 1/2+Y, 1/2+Z
SFAC C  H  N  O  P  Ru
UNIT 224  200  32  16  8  8
OMIT 0 56
L.S. 4
ACTA
BOND $H
FMAP 2
PLAN 20
CONF
twin -1 0 0 0 -1 0 0 0 -1
SIZE 0.14 0.12 0.06
TEMP -143
WGHT    0.032800    0.365600
BASF   0.30380
FVAR       0.14696
RU1   6    0.476038    0.354352    0.497935    11.00000    0.01274    0.01285 =
         0.01491   -0.00016    0.00022    0.00062
P1    5    0.546461    0.267211    0.495585    11.00000    0.01597    0.01238 =
         0.02183   -0.00224    0.00219    0.00102
O1    4    0.403839    0.441753    0.535493    11.00000    0.01927    0.01439 =
         0.02083    0.00394    0.00103    0.00058
O2    4    0.435744    0.258563    0.347551    11.00000    0.03555    0.02154 =
         0.02681   -0.00440   -0.00388    0.00505
N1    3    0.372876    0.353911    0.594335    11.00000    0.01442    0.01358 =
         0.01449    0.00117    0.00094   -0.00130
N2    3    0.370422    0.345182    0.400223    11.00000    0.01163    0.02444 =
         0.02156    0.00434    0.00022   -0.00006
N3    3    0.585304    0.373223    0.585693    11.00000    0.01343    0.01723 =
         0.01495   -0.00204    0.00122   -0.00187
N4    3    0.583295    0.374525    0.410069    11.00000    0.01473    0.02155 =
         0.01398   -0.00417    0.00092    0.00078
C1    1    0.354490    0.413227    0.593539    11.00000    0.01797    0.01992 =
         0.01766   -0.00203   -0.00249    0.00042
C2    1    0.288086    0.437057    0.652693    11.00000    0.01905    0.02013 =
         0.02614   -0.00037   -0.00072    0.00188
AFIX  43
H2    2    0.269571    0.477617    0.649963    11.00000   -1.20000
AFIX   0
C3    1    0.250650    0.400644    0.714293    11.00000    0.01621    0.02888 =
         0.02378   -0.00393    0.00278   -0.00257
AFIX  43
H3    2    0.207553    0.416521    0.755657    11.00000   -1.20000
AFIX   0
C4    1    0.275263    0.340130    0.716974    11.00000    0.02423    0.03117 =
         0.01921    0.00361    0.00291   -0.00667
AFIX  43
H4    2    0.251187    0.314913    0.760414    11.00000   -1.20000
AFIX   0
C5    1    0.335242    0.318992    0.654569    11.00000    0.01836    0.01863 =
         0.02919    0.00077    0.00094   -0.00221
AFIX  43
H5    2    0.350769    0.277931    0.653984    11.00000   -1.20000
AFIX   0
C6    1    0.374283    0.300234    0.341084    11.00000    0.02332    0.01892 =
         0.02078   -0.00103    0.00183   -0.00636
C7    1    0.307364    0.303105    0.269912    11.00000    0.02650    0.02524 =
         0.02412   -0.00478    0.00145   -0.00368
AFIX  43
H7    2    0.306708    0.271730    0.229773    11.00000   -1.20000
AFIX   0
C8    1    0.246066    0.349403    0.259566    11.00000    0.02367    0.03672 =
         0.02134   -0.00538   -0.00424   -0.00201
AFIX  43
H8    2    0.204054    0.350752    0.211707    11.00000   -1.20000
AFIX   0
C9    1    0.244017    0.395382    0.318839    11.00000    0.02422    0.04083 =
         0.03364   -0.00035   -0.00516    0.00996
AFIX  43
H9    2    0.201585    0.428408    0.312196    11.00000   -1.20000
AFIX   0
C10   1    0.306331    0.390887    0.387681    11.00000    0.02165    0.02964 =
         0.02810   -0.00151    0.00002    0.00411
AFIX  43
H10   2    0.304416    0.421564    0.428876    11.00000   -1.20000
AFIX   0
C11   1    0.615408    0.268222    0.596853    11.00000    0.02586    0.01474 =
         0.02568    0.00636   -0.00284    0.00407
AFIX  23
H11A  2    0.574879    0.250638    0.642316    11.00000   -1.20000
H11B  2    0.675465    0.244058    0.591077    11.00000   -1.20000
AFIX   0
C12   1    0.642338    0.330711    0.620153    11.00000    0.01755    0.02182 =
         0.01564    0.00316    0.00247    0.00499
C13   1    0.719896    0.344756    0.672524    11.00000    0.02377    0.03619 =
         0.02219   -0.00268    0.00073    0.00336
AFIX  43
H13   2    0.757084    0.313824    0.697630    11.00000   -1.20000
AFIX   0
C14   1    0.743880    0.402466    0.688727    11.00000    0.01847    0.04475 =
         0.02511   -0.00366   -0.00243    0.00389
AFIX  43
H14   2    0.797436    0.411969    0.724538    11.00000   -1.20000
AFIX   0
C15   1    0.688140    0.446934    0.651623    11.00000    0.02822    0.02826 =
         0.02225   -0.00832    0.00094   -0.00673
AFIX  43
H15   2    0.703657    0.487538    0.660380    11.00000   -1.20000
AFIX   0
C16   1    0.609311    0.430672    0.601497    11.00000    0.02266    0.01984 =
         0.01718    0.00215    0.00270   -0.00077
AFIX  43
H16   2    0.570321    0.461061    0.577100    11.00000   -1.20000
AFIX   0
C17   1    0.639369    0.270553    0.411580    11.00000    0.01814    0.02466 =
         0.02498   -0.00251    0.00575    0.00029
AFIX  23
H17A  2    0.702255    0.254753    0.432881    11.00000   -1.20000
H17B  2    0.618554    0.246103    0.362737    11.00000   -1.20000
AFIX   0
C18   1    0.651794    0.333644    0.384599    11.00000    0.01677    0.01908 =
         0.01965    0.00105    0.00394   -0.00158
C19   1    0.731388    0.351871    0.334118    11.00000    0.01646    0.02719 =
         0.02340    0.00585    0.00956    0.00353
AFIX  43
H19   2    0.778598    0.323707    0.315972    11.00000   -1.20000
AFIX   0
C20   1    0.740629    0.410679    0.311099    11.00000    0.02445    0.02941 =
         0.02537    0.00730    0.00627   -0.00881
AFIX  43
H20   2    0.793710    0.423284    0.276737    11.00000   -1.20000
AFIX   0
C21   1    0.671529    0.450883    0.338794    11.00000    0.03002    0.01854 =
         0.02836    0.00744   -0.00132   -0.00423
AFIX  43
H21   2    0.677048    0.491651    0.324398    11.00000   -1.20000
AFIX   0
C22   1    0.595157    0.431436    0.387101    11.00000    0.02140    0.01801 =
         0.02083    0.00668    0.00017   -0.00075
AFIX  43
H22   2    0.548016    0.459596    0.405394    11.00000   -1.20000
AFIX   0
C23   1    0.506678    0.190109    0.495900    11.00000    0.02617    0.01280 =
         0.02321   -0.00008   -0.00091   -0.00118
C24   1    0.408163    0.174844    0.500267    11.00000    0.02575    0.02124 =
         0.02523   -0.00064   -0.00109   -0.00221
AFIX  43
H24   2    0.359879    0.205126    0.500607    11.00000   -1.20000
AFIX   0
C25   1    0.379887    0.115842    0.504126    11.00000    0.03245    0.02706 =
         0.02978    0.00357    0.00072   -0.00998
AFIX  43
H25   2    0.312529    0.105781    0.507015    11.00000   -1.20000
AFIX   0
C26   1    0.450617    0.071359    0.503753    11.00000    0.05125    0.01337 =
         0.03632   -0.00165   -0.00137   -0.00545
AFIX  43
H26   2    0.431488    0.030887    0.505893    11.00000   -1.20000
AFIX   0
C27   1    0.548679    0.086145    0.500267    11.00000    0.04122    0.02070 =
         0.05399    0.01442   -0.00104    0.00415
AFIX  43
H27   2    0.597014    0.055898    0.500979    11.00000   -1.20000
AFIX   0
C28   1    0.576091    0.144935    0.495754    11.00000    0.02721    0.01880 =
         0.04599   -0.00369    0.01442    0.00130
AFIX  43
H28   2    0.643514    0.154776    0.492490    11.00000   -1.20000
AFIX   0
RU2   6    0.234967    0.639578    0.495526    11.00000    0.01406    0.01309 =
         0.01603   -0.00008    0.00042   -0.00002
P2    5    0.292621    0.729985    0.487336    11.00000    0.01618    0.01276 =
         0.02378    0.00253    0.00122    0.00073
O3    4    0.181837    0.548810    0.533379    11.00000    0.02083    0.01669 =
         0.02301    0.00089    0.00201   -0.00269
O4    4    0.184067    0.729394    0.343003    11.00000    0.03575    0.02332 =
         0.02870    0.00671   -0.00653   -0.00661
N5    3    0.131706    0.633611    0.591618    11.00000    0.01749    0.02028 =
         0.01070    0.00014    0.00026    0.00286
N6    3    0.127567    0.641155    0.398897    11.00000    0.01491    0.01906 =
         0.02571    0.00127   -0.00218   -0.00157
N7    3    0.346807    0.630211    0.584163    11.00000    0.01748    0.01464 =
         0.01452    0.00156   -0.00016    0.00190
N8    3    0.341419    0.623307    0.406131    11.00000    0.01694    0.02304 =
         0.01629    0.00417   -0.00014    0.00082
C29   1    0.126467    0.572376    0.591655    11.00000    0.01631    0.02356 =
         0.02049   -0.00117   -0.00375   -0.00028
C30   1    0.066181    0.542921    0.649948    11.00000    0.02197    0.02257 =
         0.02603    0.00388   -0.00349   -0.00552
AFIX  43
H30   2    0.060132    0.500958    0.648918    11.00000   -1.20000
AFIX   0
C31   1    0.016009    0.576216    0.708656    11.00000    0.01992    0.04014 =
         0.02743    0.00345    0.00718   -0.00250
AFIX  43
H31   2   -0.025315    0.556964    0.748426    11.00000   -1.20000
AFIX   0
C32   1    0.024994    0.638011    0.710603    11.00000    0.02112    0.04689 =
         0.02164   -0.00410    0.00710    0.00687
AFIX  43
H32   2   -0.007793    0.660972    0.752281    11.00000   -1.20000
AFIX   0
C33   1    0.082907    0.664433    0.650137    11.00000    0.01973    0.02295 =
         0.02603   -0.00039   -0.00075    0.00302
AFIX  43
H33   2    0.088399    0.706430    0.650036    11.00000   -1.20000
AFIX   0
C34   1    0.124829    0.686494    0.339511    11.00000    0.02129    0.02002 =
         0.02201    0.00019    0.00152    0.00542
C35   1    0.055726    0.680972    0.270992    11.00000    0.02024    0.03175 =
         0.02323    0.00687   -0.00142    0.00327
AFIX  43
H35   2    0.050410    0.712322    0.231073    11.00000   -1.20000
AFIX   0
C36   1   -0.001736    0.632618    0.261735    11.00000    0.01509    0.03849 =
         0.02699    0.00128   -0.00394    0.00293
AFIX  43
H36   2   -0.045300    0.629800    0.215062    11.00000   -1.20000
AFIX   0
C37   1    0.003265    0.586892    0.321052    11.00000    0.02281    0.03589 =
         0.03204   -0.00062   -0.00717   -0.00465
AFIX  43
H37   2   -0.035692    0.552232    0.315503    11.00000   -1.20000
AFIX   0
C38   1    0.067264    0.593921    0.388463    11.00000    0.02439    0.02185 =
         0.02822    0.00143   -0.00433   -0.00231
AFIX  43
H38   2    0.068994    0.563588    0.430180    11.00000   -1.20000
AFIX   0
C39   1    0.357863    0.737371    0.589245    11.00000    0.02413    0.01058 =
         0.02793    0.00140    0.00313   -0.00375
AFIX  23
H39A  2    0.414899    0.763930    0.582103    11.00000   -1.20000
H39B  2    0.313800    0.755225    0.631942    11.00000   -1.20000
AFIX   0
C40   1    0.391681    0.677659    0.619444    11.00000    0.01337    0.02703 =
         0.01989   -0.00644   -0.00292   -0.00167
C41   1    0.465911    0.670371    0.679259    11.00000    0.02292    0.02634 =
         0.01702   -0.00138   -0.00165   -0.00854
AFIX  43
H41   2    0.494911    0.704064    0.705203    11.00000   -1.20000
AFIX   0
C42   1    0.497130    0.613921    0.700652    11.00000    0.02016    0.02708 =
         0.02087    0.00292   -0.00537   -0.00020
AFIX  43
H42   2    0.546258    0.608297    0.742403    11.00000   -1.20000
AFIX   0
C43   1    0.455502    0.566100    0.660165    11.00000    0.02629    0.01639 =
         0.01815    0.00460   -0.00050    0.00409
AFIX  43
H43   2    0.478043    0.527042    0.671441    11.00000   -1.20000
AFIX   0
C44   1    0.380589    0.575470    0.602949    11.00000    0.01998    0.02210 =
         0.02175   -0.00305    0.00304   -0.00224
AFIX  43
H44   2    0.351788    0.542171    0.575828    11.00000   -1.20000
AFIX   0
C45   1    0.388363    0.728271    0.405019    11.00000    0.01916    0.02646 =
         0.02078    0.00510    0.00504    0.00114
AFIX  23
H45A  2    0.368108    0.752850    0.356132    11.00000   -1.20000
H45B  2    0.450006    0.744752    0.427932    11.00000   -1.20000
AFIX   0
C46   1    0.404105    0.666045    0.377242    11.00000    0.01814    0.02404 =
         0.01711   -0.00400   -0.00219    0.00063
C47   1    0.481913    0.649286    0.323584    11.00000    0.02189    0.03789 =
         0.02425    0.00466    0.00627   -0.00041
AFIX  43
H47   2    0.526316    0.678493    0.303582    11.00000   -1.20000
AFIX   0
C48   1    0.493903    0.591172    0.300107    11.00000    0.02508    0.03908 =
         0.01903   -0.00299    0.00097    0.01057
AFIX  43
H48   2    0.546472    0.580195    0.264059    11.00000   -1.20000
AFIX   0
C49   1    0.430176    0.549220    0.328649    11.00000    0.02871    0.02608 =
         0.02261   -0.00121   -0.00294    0.01283
AFIX  43
H49   2    0.437346    0.508897    0.312365    11.00000   -1.20000
AFIX   0
C50   1    0.354656    0.566431    0.381896    11.00000    0.02657    0.01874 =
         0.01529    0.00080    0.00140    0.00828
AFIX  43
H50   2    0.310586    0.537097    0.402075    11.00000   -1.20000
AFIX   0
C51   1    0.243255    0.805010    0.481642    11.00000    0.02464    0.01524 =
         0.02161   -0.00315   -0.00123    0.00025
C52   1    0.146056    0.815935    0.499669    11.00000    0.01939    0.02327 =
         0.02705    0.00678    0.00082    0.00309
AFIX  43
H52   2    0.103181    0.783684    0.510570    11.00000   -1.20000
AFIX   0
C53   1    0.110589    0.873282    0.502001    11.00000    0.02729    0.03305 =
         0.02308   -0.00334    0.00202    0.01216
AFIX  43
H53   2    0.043526    0.880157    0.514172    11.00000   -1.20000
AFIX   0
C54   1    0.171723    0.920390    0.486828    11.00000    0.04602    0.02002 =
         0.03931   -0.00071   -0.00186    0.01280
AFIX  43
H54   2    0.147402    0.959789    0.490000    11.00000   -1.20000
AFIX   0
C55   1    0.269379    0.910303    0.466794    11.00000    0.04614    0.01699 =
         0.06488    0.00110    0.00503   -0.00593
AFIX  43
H55   2    0.311213    0.942718    0.454012    11.00000   -1.20000
AFIX   0
C56   1    0.305479    0.852945    0.465519    11.00000    0.03069    0.01902 =
         0.05332    0.00632    0.00294   -0.00152
AFIX  43
H56   2    0.372633    0.846124    0.453674    11.00000   -1.20000
AFIX   0
HKLF 4

REM  LEM008_06
REM R1 =  0.0342 for    9028 Fo > 4sig(Fo)  and  0.0568 for all   11761 data
REM    650 parameters refined using      1 restraints

END

WGHT      0.0329      0.3657

REM Highest difference peak  0.622,  deepest hole -0.620,  1-sigma level  0.087
Q1    1   0.4823  0.3385  0.4653  11.00000  0.05    0.62
Q2    1   0.2229  0.8513  0.4983  11.00000  0.05    0.60
Q3    1   0.2598  0.6910  0.4912  11.00000  0.05    0.57
Q4    1   0.4946  0.1433  0.4968  11.00000  0.05    0.54
Q5    1   0.4026  0.3430  0.5582  11.00000  0.05    0.54
Q6    1   0.2657  0.8297  0.4890  11.00000  0.05    0.50
Q7    1   0.4818  0.3348  0.5326  11.00000  0.05    0.50
Q8    1   0.4029  0.3438  0.4382  11.00000  0.05    0.50
Q9    1   0.4999  0.0811  0.4953  11.00000  0.05    0.47
Q10   1   0.2948  0.6578  0.5394  11.00000  0.05    0.43
Q11   1   0.4380  0.3415  0.4993  11.00000  0.05    0.43
Q12   1   0.2951  0.6339  0.4317  11.00000  0.05    0.43
Q13   1   0.5196  0.3038  0.4885  11.00000  0.05    0.43
Q14   1   0.1817  0.5913  0.4867  11.00000  0.05    0.42
Q15   1   0.2385  0.6623  0.4387  11.00000  0.05    0.41
Q16   1   0.2642  0.7810  0.4996  11.00000  0.05    0.41
Q17   1   0.3006  0.6524  0.4374  11.00000  0.05    0.41
Q18   1   0.5389  0.3678  0.5612  11.00000  0.05    0.41
Q19   1   0.3775  0.3110  0.3931  11.00000  0.05    0.40
Q20   1   0.1717  0.6528  0.5615  11.00000  0.05    0.40
;
_shelx_res_checksum    2364

_shelx_hkl_file
;
 -10   5  17   -4.57   10.84   0
 -10   9  16  119.52    9.96   0
 -10  11  15   -6.18    7.22   0
 -10  15  13    2.30    6.46   0
 -10  18  11   -9.11    9.04   0
 -10  19  10  156.53    7.67   0
 -10  20   9   13.85    7.06   0
 -10  21   8   -0.76    9.30   0
 -10  23   5    9.99    9.56   0
 -10  24   3   29.03    8.64   0
  -9 -13  16    1.10   11.67   0
  -9  -8  17   18.66   11.09   0
  -9  -7  17   77.24    9.93   0
  -9   0  17   -7.15    7.46   0
  -9   1  17   19.45   10.11   0
  -9   6  16    6.60    6.85   0
  -9   9  15   17.90    6.79   0
  -9  12  14    7.42    7.99   0
  -9  18  10   20.23    8.38   0
  -9  19   9   -2.51    8.26   0
  -9  20   8    2.46    8.37   0
  -9  22   5   -5.39    8.14   0
  -9  23   3  -12.48    8.98   0
  -8  -9  16    4.62    8.50   0
  -8   2  16    0.16    6.36   0
  -8   3  16   -0.50    7.42   0
  -8   7  15    6.02    8.22   0
  -8  10  14    5.53    7.67   0
  -8  12  13   19.03    8.45   0
  -8  15  11   -3.88    6.02   0
  -8  20 -10   28.86   12.62   0
  -8  21   5   29.44    7.51   0
  -8  22  -6    0.38    8.53   0
  -7 -27   3   -0.17   10.61   0
  -7 -26   5   -1.96    8.90   0
  -7  -6 -19  -16.24   10.18   0
  -7  -5 -19    0.33    9.67   0
  -7  -4 -19   -2.53   10.96   0
  -7  -3 -19  -13.29   11.36   0
  -7  -2 -19   -5.13   10.81   0
  -7  -1 -19    3.76    9.03   0
  -7   0 -19   -5.69    7.69   0
  -7   3  15    5.96    7.61   0
  -7   5 -18    3.39   10.22   0
  -7   7  14  149.42    8.22   0
  -7  12  12  124.47    7.23   0
  -7  15  10   60.11    7.63   0
  -7  16   9   -4.26    5.59   0
  -7  17   8  165.60    6.47   0
  -7  18   7   -0.50    5.74   0
  -7  19   6  -10.50    6.36   0
  -7  20   4   61.82    5.97   0
  -7  21   2   77.19    7.35   0
  -6 -26  -5   14.52    9.88   0
  -6 -25  -8    6.94    6.88   0
  -6 -25   4   -4.84    7.69   0
  -6 -24  -9   12.79    9.00   0
  -6 -20 -13   31.68    9.00   0
  -6 -17 -15   33.57    7.29   0
  -6 -15 -16   31.41    6.73   0
  -6 -12 -17    3.58    7.19   0
  -6 -11 -17   -6.95    9.61   0
  -6  -7 -18    6.27    7.09   0
  -6  -6 -18   -0.66    7.45   0
  -6  -5 -18  128.44    9.46   0
  -6  -4 -18    4.20   10.01   0
  -6  -3 -18   70.55    9.42   0
  -6  -2 -18   -6.34    8.71   0
  -6  -1 -18   31.10    7.82   0
  -6   0 -18    2.11    6.27   0
  -6   3  14  107.95    8.08   0
  -6   5 -17  115.12    8.85   0
  -6   7  13   19.25    6.68   0
  -6   8 -16   11.84    8.51   0
  -6   9  12  122.45    6.13   0
  -6  11  11   26.34    4.84   0
  -6  12 -14    8.44   10.58   0
  -6  13  10  135.48    8.07   0
  -6  14   9   10.51    4.48   0
  -6  18   5   10.00    7.24   0
  -6  19   3  291.21    8.56   0
  -6  20  -3   32.54    7.60   0
  -6  20  -2   30.36    7.34   0
  -6  20  -1   20.36    7.15   0
  -6  20   0   -1.87    6.81   0
  -5 -25  -2    1.25    6.16   0
  -5 -24  -6    8.97    8.17   0
  -5 -23  -8   19.25    7.92   0
  -5 -19 -12   37.54    8.82   0
  -5 -18 -13    5.29    6.57   0
  -5 -16 -14    2.07    8.16   0
  -5 -14 -15   -5.24    6.76   0
  -5 -11 -16   10.70    6.06   0
  -5  -8  13   85.78    7.76   0
  -5  -5 -17   11.56    6.65   0
  -5  -4 -17   13.18    6.74   0
  -5   4 -16    1.76    8.03   0
  -5   6  12    8.76    6.67   0
  -5   7 -15  302.72   10.94   0
  -5  12   9   26.87    7.24   0
  -5  16   5  419.14    7.78   0
  -5  18  -5   43.78    7.76   0
  -5  18   1  134.18    7.47   0
  -4 -23  -3   20.02    5.65   0
  -4 -23  -2   -7.43    6.49   0
  -4 -23  -1   -2.44    6.67   0
  -4 -22  -6  141.72    7.98   0
  -4 -21  -8   15.23    5.72   0
  -4 -21   4    7.35    8.31   0
  -4 -20  -9   15.02    7.01   0
  -4 -18 -11   84.84    6.08   0
  -4 -15 -13   -3.64    6.14   0
  -4 -12 -14   -1.86    7.63   0
  -4 -11  11    2.99    7.09   0
  -4  -9 -15   13.42    6.91   0
  -4  -6  12  235.22   10.12   0
  -4  -5  12   21.72    7.09   0
  -4  -4  12  130.54    6.93   0
  -4  -3  12   -2.45    4.77   0
  -4  -2  12   23.84    7.00   0
  -4  -1  12    2.48    6.91   0
  -4   2 -15    6.17    7.60   0
  -4   6 -14   21.65    6.81   0
  -4   7  10   -0.98    4.91   0
  -4   8 -13   28.33    8.19   0
  -4   9   9   20.29    4.62   0
  -4  12   7   22.89    6.72   0
  -4  13   6    3.90    4.90   0
  -4  14   5  130.69    7.13   0
  -4  16  -5    9.84    9.61   0
  -4  16   1    6.84    5.05   0
  -3 -20  -5   43.63    7.79   0
  -3 -19  -7  141.31    7.28   0
  -3 -18  -8   13.66    7.05   0
  -3 -16 -10  255.77    8.10   0
  -3 -15 -11   12.91    5.39   0
  -3 -13 -12  103.90    5.56   0
  -3 -10 -13   43.06    6.94   0
  -3  -8  10  304.15   10.39   0
  -3  -5 -14    8.64    4.89   0
  -3  -4 -14   30.66    6.49   0
  -3  -3 -14  113.54    7.00   0
  -3   1  10   22.33    4.91   0
  -3   5   9    1.58    6.46   0
  -3   6 -12  246.68   11.40   0
  -3   8 -11   15.95    8.16   0
  -3   9   7   74.72    7.09   0
  -3  14  -4   43.89    8.16   0
  -3  14   0    6.27    6.52   0
  -2 -18  -2   13.47    4.90   0
  -2 -17  -5   72.76    8.22   0
  -2 -16  -7   16.72    5.49   0
  -2 -16   3   21.25    7.80   0
  -2 -15  -8   10.94    5.33   0
  -2 -14  -9    0.51    5.28   0
  -2 -12 -10   29.19    7.19   0
  -2 -10 -11   -2.55    5.41   0
  -2  -8   8    7.69    8.51   0
  -2  -6 -12    4.57    5.10   0
  -2  -4 -12    3.96    6.52   0
  -2  -3 -12   10.60    6.47   0
  -2  -2 -12   12.02    6.54   0
  -2   1   8   37.26    5.67   0
  -2   3 -11   21.46    7.24   0
  -2   4   7   -1.97    5.23   0
  -2   7  -9   16.35    7.54   0
  -2   9   4   11.90    7.00   0
  -1 -14  -3   45.73    6.42   0
  -1 -14  -2   12.46    6.77   0
  -1 -14  -1   43.36    7.26   0
  -1 -13  -5   50.85    6.74   0
  -1 -12  -6  221.64    7.64   0
  -1 -11  -7  315.15    8.15   0
  -1  -6  -9  275.15    8.39   0
  -1   0  -9    1.41    7.45   0
  -1   3  -8  123.72    8.67   0
  -1   4   4   32.79   10.66   0
  -1   7   1  379.28   13.29   0
   0  -7  -3   57.38    9.94   0
   0  -7  -2   -9.08    9.42   0
   0  -7  -1   22.66   10.35   0
   0  -6  -4  596.15   10.92   0
   0  -1  -4   -0.04   10.69   0
 -10   6  17   14.68   10.83   0
 -10  12  15   24.80   10.32   0
 -10  14  14   21.73   10.06   0
 -10  16  13   34.86    9.26   0
 -10  17  12   37.41    7.29   0
 -10  22   7    7.76    7.21   0
 -10  23   6  150.43   10.22   0
 -10  24   4   16.90    9.81   0
 -10  25  -2   33.01   11.37   0
 -10  25  -1   -4.45   11.07   0
 -10  25   0   -4.53    9.85   0
  -9  -9  17    1.31   11.98   0
  -9   2  17   18.65    7.20   0
  -9   3  17   45.98    9.10   0
  -9   7  16   13.47    7.41   0
  -9  10  15    6.08    6.85   0
  -9  14  13   18.19    6.91   0
  -9  16  12   12.16    8.18   0
  -9  17  11   91.44    6.74   0
  -9  21   7  127.14    7.30   0
  -9  23  -7    2.30   10.69   0
  -9  23   4  -10.82    8.73   0
  -9  24  -3   55.04    9.96   0
  -9  24  -2   21.38    9.20   0
  -9  24  -1   37.08    9.81   0
  -9  24   0    3.70    9.57   0
  -8 -10  16   21.71   10.61   0
  -8   4  16   63.22    7.72   0
  -8   8 -18   10.04   10.14   0
  -8   8  15   44.48    8.02   0
  -8  14  12   81.15    6.38   0
  -8  17  10   20.50    8.23   0
  -8  18   9  204.73    7.21   0
  -8  19   8   15.66    5.97   0
  -8  20   7  157.32    8.45   0
  -8  22   3   20.33    6.28   0
  -8  23  -3    8.95    7.72   0
  -8  23  -2   -3.46    7.11   0
  -8  23  -1    8.83    7.31   0
  -8  23   0   23.40    7.56   0
  -7 -14  14    2.78   10.90   0
  -7 -10 -18    7.53   10.95   0
  -7 -10  15    6.31    7.81   0
  -7   4  15    4.33    7.84   0
  -7   8 -17   20.30    9.98   0
  -7   8  14  242.16    8.33   0
  -7  10  13    4.52    5.20   0
  -7  14 -14    9.05   13.11   0
  -7  14  11   59.50    7.42   0
  -7  20  -8   44.53   10.00   0
  -7  20   5    9.10    6.74   0
  -7  21  -6   13.50    9.91   0
  -6 -26  -4   40.71    8.88   0
  -6 -26  -3   21.31    9.99   0
  -6 -26   0   55.89    9.50   0
  -6 -26   1    4.96    7.98   0
  -6 -25  -7   14.54    7.03   0
  -6 -23 -10   13.09    7.09   0
  -6 -22 -11   -2.17    7.16   0
  -6 -21 -12   12.88    7.40   0
  -6 -16 -15   22.24    8.76   0
  -6 -16  12    4.40   13.37   0
  -6 -14 -16   10.94    7.21   0
  -6 -10 -17   12.68    9.83   0
  -6 -10  14    3.98    6.87   0
  -6   4 -17   16.31    8.37   0
  -6   4  14    4.97    7.94   0
  -6  10 -15    6.13    9.94   0
  -6  10  12    9.07    7.38   0
  -6  12  11   -6.43    6.85   0
  -6  16   8   -5.39    6.56   0
  -6  17 -10   48.67   14.01   0
  -6  19  -7  149.60   10.18   0
  -6  19   4  466.76    9.20   0
  -6  20  -4    5.44    8.39   0
  -6  20   1    9.53    7.62   0
  -5 -24  -5   27.88    7.72   0
  -5 -23  -7    9.51    8.28   0
  -5 -23   4   46.71    7.31   0
  -5 -22  -9   12.18    6.56   0
  -5 -21 -10   15.06    6.19   0
  -5 -20 -11   18.43    6.58   0
  -5 -17 -13  172.21    9.18   0
  -5 -15 -14    5.91    8.51   0
  -5 -13 -15   49.12    6.33   0
  -5 -10 -16   35.63    6.78   0
  -5  -9 -16   12.83    8.14   0
  -5  -9  13   43.38    7.20   0
  -5   3 -16    4.78    7.92   0
  -5   3  13  128.26    7.34   0
  -5   9  11   33.20    6.79   0
  -5  11 -13  130.50   13.05   0
  -5  11  10   10.39    7.11   0
  -5  15   7  210.23    7.42   0
  -5  17   4   33.55    5.32   0
  -5  18   2   63.25    6.88   0
  -4 -22  -5    1.23    6.62   0
  -4 -21  -7   13.20    7.00   0
  -4 -17 -11   -8.34    7.18   0
  -4 -17   8   14.91    9.88   0
  -4 -16 -12   25.36    5.69   0
  -4 -14 -13  102.10    6.48   0
  -4 -11 -14    2.51    7.48   0
  -4  -8 -15    8.71    5.41   0
  -4  -7 -15   21.02    7.95   0
  -4  -7  12    8.64    7.47   0
  -4   0  12  284.56    7.38   0
  -4   1 -15   17.20    7.48   0
  -4   1  12    2.18    6.98   0
  -4   5  11   10.83    6.97   0
  -4  11   8    7.90    4.78   0
  -4  15   4   39.66    7.06   0
  -4  16   2   15.96    7.32   0
  -3 -20  -4  103.91    6.66   0
  -3 -20   1   39.13    6.82   0
  -3 -19  -6   -5.27    6.71   0
  -3 -19   3  162.07    8.33   0
  -3 -17  -9   30.99    5.34   0
  -3 -14 -11   12.06    5.42   0
  -3 -12 -12  116.96    5.53   0
  -3  -9 -13   32.89    4.95   0
  -3   2  10  127.06    5.93   0
  -3   3 -13   62.90    7.61   0
  -3   8   8  219.48    7.41   0
  -3  13   3   35.43    5.01   0
  -3  14   1   58.59    6.96   0
  -2 -17  -4   35.65    7.07   0
  -2 -17   1  236.71    8.66   0
  -2 -16  -6   50.23    7.18   0
  -2 -15  -7  473.63    9.36   0
  -2 -15   4   29.98    8.14   0
  -2 -14  -8    2.41    6.73   0
  -2 -14   5    6.84    7.02   0
  -2 -13  -9  398.21    7.44   0
  -2 -11 -10   17.30    6.91   0
  -2  -8 -11    4.24    6.60   0
  -2   2 -11    6.85    7.18   0
  -2   2   8   13.58    7.37   0
  -2   5 -10  325.39   10.34   0
  -2   5   7  675.86   11.05   0
  -2   8   5   -0.71    5.15   0
  -2  10   3   26.12    7.23   0
  -2  11   1  220.39    7.18   0
  -1 -13  -4  108.53    7.41   0
  -1 -10   4  340.79   15.20   0
  -1  -9  -8    2.85    4.71   0
  -1  -5  -9  103.20    5.62   0
  -1  -4  -9   71.74    7.40   0
  -1  -4   6   83.83   11.25   0
  -1  -3  -9  433.57    9.87   0
  -1  -3   6  144.04   10.64   0
  -1  -2   6  181.96   11.11   0
  -1  -1  -9  176.28    7.03   0
  -1   2   5   30.53    8.17   0
   0  -6  -3   -1.67    9.63   0
   0  -5  -4   -1.21    6.73   0
   0  -4  -4 1393.79   18.35   0
   0  -3  -4    0.32   11.03   0
   0  -2  -4  307.09   13.03   0
   0   0  -3   -0.43   11.54   0
 -10  10  16    9.67    8.12   0
 -10  19  11    7.20   11.24   0
 -10  20  10    5.61    7.76   0
 -10  21   9    4.98   10.72   0
 -10  22   8    5.11    9.61   0
 -10  25   1    4.36   10.97   0
  -9   4  17   -2.34    9.89   0
  -9   8  16   -5.04    9.61   0
  -9  11  15   72.18   10.04   0
  -9  13  14    7.20    9.98   0
  -9  15  13   48.95    9.26   0
  -9  19  10   14.07    9.03   0
  -9  20   9   23.60    9.13   0
  -9  22  -9    6.41   10.46   0
  -9  22   6   19.06    6.98   0
  -9  24  -4   18.46    9.47   0
  -9  24   1   17.20    7.40   0
  -9  24   2    5.73    8.66   0
  -8 -14  15  100.38   13.29   0
  -8   5  16    3.14    8.65   0
  -8  11  14   11.10    6.24   0
  -8  13  13   26.06    6.76   0
  -8  15  12   22.40    7.96   0
  -8  16  11    9.64    6.12   0
  -8  21   6    8.00    9.04   0
  -8  22  -7    1.14    9.47   0
  -8  22   4   15.00    8.38   0
  -8  23  -4   -3.48    7.52   0
  -8  23   1    7.17    8.41   0
  -7 -27  -4    4.92   10.41   0
  -7 -27   1    8.04   10.16   0
  -7 -26   4   64.16   10.51   0
  -7 -25   6   32.45    9.08   0
  -7 -13 -17    1.87    9.81   0
  -7 -11  15   -1.45    8.78   0
  -7  -9 -18   25.13   10.79   0
  -7  -3  16   53.66    8.24   0
  -7  -2  16  210.17    9.49   0
  -7   4 -18   14.66    8.95   0
  -7   5  15    0.56    5.43   0
  -7  11  13    4.09    7.86   0
  -7  13  12   22.91    7.44   0
  -7  16  10  219.95    7.89   0
  -7  17   9   13.14    7.61   0
  -7  18   8   37.62    7.82   0
  -7  19   7   31.55    7.01   0
  -7  21   3    7.75    5.30   0
  -7  22  -2   52.79    6.84   0
  -7  22  -1   -7.67    7.55   0
  -7  22   0   15.45    6.92   0
  -6 -26  -2   41.08    6.81   0
  -6 -26  -1    2.97    7.21   0
  -6 -25  -6    3.56    8.77   0
  -6 -24  -8    5.76    6.84   0
  -6 -24   5    8.65    8.21   0
  -6 -23  -9   85.48    9.99   0
  -6 -20 -12   13.86    9.64   0
  -6 -19 -13  100.92    7.76   0
  -6 -17 -14   10.11    9.87   0
  -6 -15 -15   58.88    9.98   0
  -6 -13 -16   62.33    7.63   0
  -6  -9 -17  146.57    8.74   0
  -6  -3  15   29.69    7.15   0
  -6   3 -17   30.82    9.13   0
  -6   7 -16   27.27    9.76   0
  -6   8  13    6.08    5.58   0
  -6  14  10   11.73    7.38   0
  -6  15   9  135.98    6.33   0
  -6  17   7   39.10    5.34   0
  -6  18   6   31.27    7.44   0
  -6  20  -5   31.14    8.91   0
  -6  20   2   33.98    7.55   0
  -5 -24  -4   20.85    6.18   0
  -5 -24  -3    9.45    8.40   0
  -5 -24   0   38.51    8.29   0
  -5 -24   1   34.10    7.72   0
  -5 -23  -6   38.41    8.10   0
  -5 -22  -8  -15.67    8.27   0
  -5 -18 -12   24.92    7.69   0
  -5 -13  12   80.83   12.25   0
  -5 -12 -15   98.46    7.99   0
  -5  -8 -16   29.32    7.83   0
  -5   2 -16   19.08    7.39   0
  -5   4  13   25.41    6.87   0
  -5   7  12   21.50    5.01   0
  -5   9 -14   22.71    8.29   0
  -5  13   9   38.99    6.71   0
  -5  14   8   12.92    4.86   0
  -5  16  -9  131.46   15.62   0
  -5  16   6    2.20    4.96   0
  -5  17   5  273.79    7.76   0
  -5  18   3   96.38    7.16   0
  -4 -22  -4  184.51    7.88   0
  -4 -22  -3   10.32    7.87   0
  -4 -22   1    6.33    7.62   0
  -4 -21  -6   34.62    7.35   0
  -4 -20  -8   87.03    5.88   0
  -4 -20   5   58.28    8.28   0
  -4 -19  -9   -2.98    6.86   0
  -4 -18 -10  146.00    7.48   0
  -4 -15 -12    6.68    7.35   0
  -4 -13 -13   24.44    7.87   0
  -4 -10 -14  312.19    9.37   0
  -4  -6 -15   53.34    6.62   0
  -4  -5 -15   10.42    7.48   0
  -4  -4 -15  191.48    9.28   0
  -4  -3 -15    4.09    8.23   0
  -4  -2 -15    8.67    7.63   0
  -4  -1 -15   15.94    7.52   0
  -4   0 -15   53.75    6.04   0
  -4   2  12   14.81    6.99   0
  -4   5 -14   -1.05    6.60   0
  -4   6  11  270.74    8.32   0
  -4   8  10   66.42    5.17   0
  -4  10   9   26.85    5.40   0
  -4  13   7   16.80    6.63   0
  -4  14   6  884.71   10.43   0
  -4  16   3   10.23    6.83   0
  -4  17  -2   20.10    6.55   0
  -4  17  -1   -1.15    6.21   0
  -3 -20  -3    5.88    5.24   0
  -3 -20  -2   93.57    6.95   0
  -3 -20  -1   37.79    6.84   0
  -3 -19  -5   91.48    7.08   0
  -3 -18  -7   40.08    6.11   0
  -3 -17  -8  175.03    7.43   0
  -3 -16  -9   11.72    6.22   0
  -3 -15 -10   64.97    4.92   0
  -3 -13 -11   -5.98    6.52   0
  -3 -11 -12   81.41    6.58   0
  -3  -9  10   33.44    7.82   0
  -3  -8 -13   46.22    5.13   0
  -3  -7 -13   -1.27    6.85   0
  -3   2 -13  107.31    8.50   0
  -3   3  10   85.35    5.60   0
  -3   6   9   19.73    4.66   0
  -3  10   7   33.54    6.15   0
  -3  11   6  430.33    7.54   0
  -3  12   5  316.14    8.26   0
  -3  14   2   20.69    6.56   0
  -2 -17  -3   54.88    6.56   0
  -2 -17  -2   21.30    7.35   0
  -2 -17  -1  229.00    8.71   0
  -2 -17   0   37.67    7.44   0
  -2 -16  -5   -5.68    6.68   0
  -2 -12  -9   -0.67    6.46   0
  -2 -10 -10   17.05    6.43   0
  -2  -7 -11   16.24    6.65   0
  -2   3   8  105.58    7.49   0
  -2   7   6   13.53    4.98   0
  -2  11   2   23.73    7.14   0
  -1 -13  -3  166.72    7.98   0
  -1 -13   0  428.11   10.56   0
  -1 -12  -5  345.85    8.55   0
  -1 -11  -6  209.28    7.66   0
  -1  -8  -8   12.56    4.86   0
  -1  -7  -8   54.38    7.20   0
  -1  -1   6   22.61    8.61   0
  -1   2  -8  103.95    8.48   0
  -1   3   5   78.58    9.91   0
  -1   4  -7  124.73   11.35   0
  -1   6   3  297.24   11.74   0
  -1   8  -1  428.05   13.41   0
   0  -6  -2  107.48    8.71   0
   0  -6  -1   -4.50   10.17   0
   0  -5  -3    7.71   10.78   0
 -10  13  15   -0.30    8.22   0
 -10  15  14   80.73    8.30   0
 -10  17  13   17.56   10.16   0
 -10  18  12   10.67    7.54   0
 -10  23   7    6.63   11.28   0
 -10  24   5   17.66    7.95   0
 -10  25   2    0.69    8.77   0
  -9 -10  17   -3.33   10.96   0
  -9   5  17    1.06   10.14   0
  -9   9  16    4.64    9.59   0
  -9  17  12  -15.90    9.58   0
  -9  18  11    6.64    7.07   0
  -9  21   8   36.80    7.55   0
  -9  22   7   -0.61    8.75   0
  -9  23   5    8.25    7.27   0
  -9  24  -5   46.52    9.16   0
  -9  24   3   63.90    8.90   0
  -8 -11  16    3.65   10.54   0
  -8  -4  17   99.54    9.41   0
  -8  -3  17    4.55    8.93   0
  -8  -2  17    5.32    8.92   0
  -8  -1  17    6.76    8.09   0
  -8   0  17   76.55    8.23   0
  -8   6  16   22.19    8.88   0
  -8   7 -18   -5.09   11.45   0
  -8   9  15   16.72    6.61   0
  -8  10 -17   93.25   12.41   0
  -8  12  14   69.78    8.33   0
  -8  14  13  150.25    8.37   0
  -8  18  10   71.64    8.21   0
  -8  19   9    7.41    8.56   0
  -8  20   8    1.48    8.49   0
  -8  21  -9   20.34   12.71   0
  -8  22   5    9.76    7.33   0
  -8  23   2    7.25    8.76   0
  -7 -27  -3    3.10    8.27   0
  -7 -27  -2    2.79    8.60   0
  -7 -27  -1   10.24    9.73   0
  -7 -27   0    8.02    8.64   0
  -7 -26  -6  102.90   10.37   0
  -7 -25  -8   56.08    9.41   0
  -7 -24   7    1.78   10.19   0
  -7 -19 -14    1.13    7.52   0
  -7 -17 -15   22.13   10.32   0
  -7 -15 -16   85.83   10.47   0
  -7 -12 -17    9.74    8.62   0
  -7  -8 -18   96.51    7.73   0
  -7  -7 -18   64.24    9.96   0
  -7  -6  16   89.86    8.56   0
  -7  -5  16   47.33    8.94   0
  -7  -4  16    8.06    6.25   0
  -7  -1  16   36.10    6.80   0
  -7   0  16   -0.92    8.54   0
  -7   1  16   43.01    8.30   0
  -7   2 -18  117.49   11.19   0
  -7   3 -18   29.81    9.03   0
  -7   6  15    5.43    5.79   0
  -7   7 -17    2.60   10.54   0
  -7   9  14   10.47    5.78   0
  -7  10 -16    0.96    9.78   0
  -7  12 -15    4.72   11.83   0
  -7  15  11   -0.72    7.62   0
  -7  20   6   93.90    8.12   0
  -7  21   4   67.63    6.13   0
  -7  22  -3    9.94    7.39   0
  -7  22   1    4.61    7.65   0
  -6 -25  -5    7.29    6.67   0
  -6 -24  -7   19.64    8.38   0
  -6 -22 -10   44.43    7.77   0
  -6 -21 -11    7.94    7.32   0
  -6 -18 -13    7.11    8.92   0
  -6 -14  13   12.63   10.62   0
  -6 -12 -16   18.27    6.79   0
  -6 -11  14   47.85    8.63   0
  -6  -8 -17    4.77    6.49   0
  -6  -7 -17   14.66    8.39   0
  -6  -5  15  211.22    9.25   0
  -6  -4  15   14.92    7.74   0
  -6  -2  15   -0.62    5.34   0
  -6  -1  15   91.53    6.44   0
  -6   0  15    1.42    8.09   0
  -6   1  15  113.67    7.75   0
  -6   2 -17   -7.24    9.05   0
  -6   6  14    8.79    8.25   0
  -6   9  13   85.18    8.14   0
  -6  11  12   16.80    6.03   0
  -6  13  11  188.15    8.48   0
  -6  19   5  113.05    8.51   0
  -6  20   3   23.62    8.02   0
  -5 -24  -2    5.15    6.62   0
  -5 -24  -1   36.26    6.45   0
  -5 -22   5   46.50    7.50   0
  -5 -21  -9   78.50    6.59   0
  -5 -20 -10   53.49    6.08   0
  -5 -19 -11   -2.40    6.15   0
  -5 -16 -13   68.75    6.10   0
  -5 -14 -14   10.40    6.41   0
  -5 -11 -15   99.91    7.99   0
  -5 -10  13   21.41    8.47   0
  -5  -7 -16    4.91    5.76   0
  -5  -6 -16    0.26    7.19   0
  -5  -5 -16  -16.98    7.88   0
  -5  -3  14    3.41    6.96   0
  -5  -2  14    7.38    7.10   0
  -5   0 -16   -1.71    7.68   0
  -5   1 -16   14.86    7.53   0
  -5   5  13   53.93    7.41   0
  -5   6 -15  109.26    8.54   0
  -5   8  12   -3.17    6.70   0
  -5  10  11    3.40    4.85   0
  -5  12  10    3.77    6.55   0
  -5  18  -6  135.63   10.13   0
  -5  19  -3   56.60    6.33   0
  -5  19  -2    7.43    6.48   0
  -5  19  -1    9.03    5.07   0
  -5  19   0   43.86    7.23   0
  -5  19   1    7.12    6.28   0
  -4 -22  -2  161.18    8.52   0
  -4 -22  -1    6.41    7.62   0
  -4 -22   0  118.09    6.90   0
  -4 -21  -5   95.48    8.59   0
  -4 -21   3   25.81    7.41   0
  -4 -20  -7   31.03    7.96   0
  -4 -19   6   10.42    7.43   0
  -4 -18   7  119.56   10.23   0
  -4 -16 -11   11.00    6.88   0
  -4 -12 -13    6.98    8.30   0
  -4  -9 -14   13.88    8.34   0
  -4  -8  12   36.24    6.66   0
  -4   3  12    5.93    7.02   0
  -4   4 -14  210.24    8.54   0
  -4   9  10    0.28    6.41   0
  -4  11 -11    1.84   10.07   0
  -4  12   8  150.66    6.03   0
  -4  15   5   16.85    5.26   0
  -4  16  -6   43.58    9.07   0
  -4  17  -3   19.75    7.95   0
  -4  17   0   22.54    5.23   0
  -4  17   1   -1.55    6.38   0
  -3 -19  -4   36.61    6.94   0
  -3 -18  -6    3.40    6.67   0
  -3 -18   4    1.05    6.48   0
  -3 -15   7   43.55   11.11   0
  -3 -14 -10    0.86    7.04   0
  -3 -10 -12    8.63    6.37   0
  -3  -6 -13   95.89    7.07   0
  -3  -5 -13   20.35    7.10   0
  -3  -3  11   20.23    6.61   0
  -3  -2  11   30.78    7.03   0
  -3   0 -13    1.68    7.54   0
  -3   1 -13   45.80    7.06   0
  -3   4  10   93.91    5.55   0
  -3   5 -12    5.94    6.95   0
  -3   7   9    4.44    6.71   0
  -3   9   8    2.90    6.62   0
  -3  13   4  137.57    5.63   0
  -3  14  -5  171.99   10.23   0
  -2 -16  -4    0.55    7.08   0
  -2 -15  -6   25.19    6.59   0
  -2 -14  -7   -2.93    6.69   0
  -2 -13  -8   25.04    6.82   0
  -2  -9 -10   18.27    6.76   0
  -2  -6 -11   16.77    5.26   0
  -2  -5 -11  601.45   10.26   0
  -2  -2   9    9.09    6.74   0
  -2   0 -11    2.28    6.65   0
  -2   6   7    0.44    6.75   0
  -2   8  -8    5.78    9.51   0
  -2   9   5  916.15   11.77   0
  -2  10   4    8.12    6.91   0
  -2  12  -2  130.55    8.40   0
  -2  12  -1   41.78    7.58   0
  -1 -13  -2  295.67    7.64   0
  -1 -13  -1  160.94    6.73   0
  -1 -12  -4   50.08    7.36   0
  -1 -11   3  791.07   15.61   0
  -1  -9  -7   77.65    5.40   0
  -1  -6  -8   39.58    7.51   0
  -1  -5   6   20.49   10.59   0
  -1   0   6   -1.27    8.44   0
  -1   1  -8   14.23    7.19   0
  -1   5   4   11.22    7.91   0
  -1   7   2  246.45    9.86   0
  -1   8  -2   21.86    9.65   0
  -1   8   0  103.69   10.21   0
   0  -5  -2   -0.33   10.68   0
   0  -5  -1    8.48   11.06   0
   0  -4  -3   -1.26    7.45   0
   0  -3  -3   10.09   11.18   0
   0  -2  -3    2.69   11.24   0
   0  -1  -3   14.60   11.57   0
  -9  -3  18    0.91    9.73   0
  -9  -2  18   -5.67    9.80   0
  -9  -1  18    0.66    9.86   0
  -9   6  17   24.07    9.41   0
  -9  10  16   -2.43    8.23   0
  -9  12  15   12.83    7.32   0
  -9  14  14    9.50    7.02   0
  -9  16  13  118.01   10.29   0
  -9  20  10   -4.47    8.88   0
  -9  23   6   -5.96    8.81   0
  -9  24   4    9.21    9.17   0
  -8  -6  17   27.24    8.85   0
  -8  -5  17    4.00    9.97   0
  -8   1  17   -4.34    9.14   0
  -8   2  17    7.16    7.92   0
  -8   7  16    4.24    8.40   0
  -8  10  15  103.14    9.17   0
  -8  12 -16   20.81   11.68   0
  -8  14 -15  102.05   15.11   0
  -8  16  12    5.60    8.96   0
  -8  17  11   27.77    5.89   0
  -8  21   7   -4.00    6.77   0
  -8  23  -5    8.08    8.09   0
  -8  23   3   13.51    6.70   0
  -7 -26  -5    2.96    8.33   0
  -7 -25  -7   -2.97    9.25   0
  -7 -24  -9   -2.40    7.74   0
  -7 -23 -10    6.03    8.61   0
  -7 -23   8    4.56   11.47   0
  -7 -22 -11    5.60    9.81   0
  -7 -21 -12   44.44    8.65   0
  -7 -21  10   47.60   13.05   0
  -7 -20 -13   -4.07    7.96   0
  -7 -18 -14   55.73    9.49   0
  -7 -14 -16   21.65    8.59   0
  -7 -11 -17   -0.73    8.04   0
  -7  -7  16   88.25    8.03   0
  -7  -6 -18   54.90    9.40   0
  -7  -5 -18   24.67    9.76   0
  -7   0 -18  -10.27    9.86   0
  -7   1 -18   12.13   10.03   0
  -7   2  16  233.55   10.13   0
  -7   3  16   51.74    8.25   0
  -7   7  15   11.51    7.85   0
  -7  10  14   -2.14    7.51   0
  -7  12  13    2.04    5.55   0
  -7  14  12    1.26    7.50   0
  -7  17  10   68.83    7.20   0
  -7  18   9   19.75    7.47   0
  -7  19   8    1.23    6.84   0
  -7  21  -7   -2.89    9.80   0
  -7  21   5    4.36    7.48   0
  -7  22  -4   64.96    8.62   0
  -7  22   2   50.12    5.93   0
  -6 -25  -4   -6.15    6.11   0
  -6 -25  -3   52.21    8.36   0
  -6 -25   1   -3.34    8.42   0
  -6 -24  -6   12.15    8.26   0
  -6 -23  -8   18.67    7.51   0
  -6 -23   6   18.00    7.78   0
  -6 -19 -12  110.43    8.23   0
  -6 -16 -14    5.03    6.19   0
  -6 -14 -15    0.67    6.08   0
  -6 -11 -16   15.86    6.50   0
  -6  -6 -17    5.86    7.09   0
  -6  -6  15   27.19    7.41   0
  -6  -5 -17  164.62    9.13   0
  -6  -4 -17   15.98    8.48   0
  -6   0 -17    7.73    8.97   0
  -6   1 -17  102.54    8.84   0
  -6   2  15  -11.74    7.59   0
  -6   7  14   13.72    7.92   0
  -6  12  12   43.20    7.68   0
  -6  15  10   83.91    8.27   0
  -6  16   9   27.19    6.21   0
  -6  17   8   36.73    6.33   0
  -6  18  -9   10.93   10.43   0
  -6  18   7   11.03    8.22   0
  -6  20   4    6.59    8.06   0
  -6  21  -2   47.56    7.87   0
  -6  21  -1    5.42    8.00   0
  -6  21   0   -3.12    8.19   0
  -5 -23  -5    4.36    6.08   0
  -5 -23  -4   47.39    7.89   0
  -5 -22  -7   32.65    5.88   0
  -5 -21  -8   28.66    7.76   0
  -5 -18 -11   42.60    7.75   0
  -5 -17 -12   12.92    6.20   0
  -5 -15 -13   81.41    7.58   0
  -5 -13 -14   36.00    5.96   0
  -5 -10 -15    7.47    5.48   0
  -5  -5  14    5.56    7.24   0
  -5  -4 -16    1.30    5.88   0
  -5  -4  14   -1.80    6.78   0
  -5  -3 -16   14.89    6.78   0
  -5  -2 -16    9.09    6.73   0
  -5  -1 -16   23.27    6.80   0
  -5  -1  14   45.13    5.80   0
  -5   0  14   -3.72    7.37   0
  -5   1  14   51.65    7.17   0
  -5   6  13   86.90    7.07   0
  -5   9  12  118.57    6.63   0
  -5  11  11   88.96    7.17   0
  -5  14   9    1.42    6.78   0
  -5  15   8   17.93    4.98   0
  -5  16   7  109.68    5.53   0
  -5  17   6    8.94    6.51   0
  -5  18   4  352.83    7.20   0
  -5  19  -4   10.94    7.47   0
  -5  19   2   12.54    6.14   0
  -4 -21  -4    5.07    8.05   0
  -4 -19  -8    4.23    6.14   0
  -4 -18  -9  101.19    6.40   0
  -4 -17 -10    5.34    6.15   0
  -4 -14 -12  191.59    7.26   0
  -4 -11 -13   33.15    8.22   0
  -4  -8 -14  109.69    7.68   0
  -4   4  12  159.43    8.92   0
  -4   7 -13   14.05    6.84   0
  -4   7  11    1.20    4.99   0
  -4  11   9   16.18    5.31   0
  -4  16   4   50.34    7.04   0
  -4  17  -4    7.71    8.88   0
  -4  17   2   35.04    6.91   0
  -3 -19  -3  146.78    7.76   0
  -3 -19   1  161.43    7.86   0
  -3 -17  -7   30.73    6.58   0
  -3 -17   5    2.37    7.67   0
  -3 -16  -8  257.93    7.94   0
  -3 -16   6  392.73   14.17   0
  -3 -15  -9    3.13    4.83   0
  -3 -12 -11   49.82    5.21   0
  -3  -9 -12   47.13    6.58   0
  -3  -5  11   -0.69    7.61   0
  -3  -4 -13   36.13    5.18   0
  -3  -4  11   21.69    7.12   0
  -3  -3 -13   70.34    7.07   0
  -3  -2 -13  110.60    7.58   0
  -3  -1 -13   47.70    7.05   0
  -3  -1  11   15.96    5.31   0
  -3   0  11   -1.23    6.99   0
  -3   5  10   10.39    6.79   0
  -3   9 -10   32.56    9.40   0
  -3  12   6  589.46    9.64   0
  -3  14   3  108.36    5.65   0
  -3  15  -2  109.28    7.66   0
  -3  15  -1   15.54    6.73   0
  -3  15   0   22.62    6.94   0
  -2 -16  -3   15.88    7.28   0
  -2 -16   1   11.48    6.72   0
  -2 -15  -5  402.13    9.16   0
  -2  -8 -10   20.02    6.77   0
  -2  -4 -11    2.38    5.11   0
  -2  -4   9    9.90    6.35   0
  -2  -3 -11   21.99    5.13   0
  -2  -3   9  142.22    8.03   0
  -2  -2 -11    3.71    6.16   0
  -2  -1 -11  714.76    9.85   0
  -2  -1   9 1116.83   14.30   0
  -2   0   9    3.02    7.41   0
  -2   4 -10    0.79    6.75   0
  -2   4   8   13.01    4.87   0
  -2   8   6   20.32    5.13   0
  -2  11  -5  223.10   13.64   0
  -2  11   3  518.87   10.05   0
  -2  12   0   72.28    6.07   0
  -2  12   1   42.48    6.90   0
  -1 -12  -3  458.51   10.05   0
  -1 -11  -5  424.24    8.01   0
  -1 -10  -6   61.39    5.59   0
  -1  -8  -7   99.07    7.33   0
  -1  -5  -8   17.39    4.91   0
  -1  -4  -8   48.00    7.03   0
  -1   0  -8    2.96    7.17   0
  -1   1   6   22.63    9.20   0
  -1   4   5  192.85   10.83   0
  -1   8   1  424.39   12.24   0
   0  -4  -2  817.86   17.34   0
   0   0  -2 5772.09   54.60   0
  -9  -5  18   -6.47   11.66   0
  -9  -4  18   -1.98   10.91   0
  -9   0  18   -0.51    8.38   0
  -9   1  18    5.56   11.24   0
  -9   2  18    6.38    9.60   0
  -9   7  17   87.50    7.58   0
  -9  13  15   28.02    9.23   0
  -9  15  14   19.76    9.03   0
  -9  18  12    5.40    9.40   0
  -9  19  11   -6.04    7.40   0
  -9  21   9  111.08    7.93   0
  -9  22   8   29.71    9.75   0
  -9  23  -8    4.56   11.37   0
  -9  24  -6    5.84   10.39   0
  -9  25  -3   65.00    9.03   0
  -9  25  -2   11.51    9.49   0
  -9  25  -1   98.93    9.90   0
  -9  25   0   10.55    9.50   0
  -9  25   1   91.85    9.56   0
  -8 -17  14   -0.25   14.23   0
  -8  -7  17   -0.91    9.49   0
  -8   3  17    2.43    9.26   0
  -8   6 -18   44.14    9.56   0
  -8   8  16    7.20    8.44   0
  -8  11  15    8.55    7.65   0
  -8  13  14    4.54    8.50   0
  -8  15  13    4.87    8.21   0
  -8  19  10    3.56    7.80   0
  -8  20   9  160.68    8.08   0
  -8  22   6    5.79    6.59   0
  -8  23  -6    6.76    9.87   0
  -8  23   4   12.88    8.50   0
  -8  24  -2   18.19    7.18   0
  -8  24  -1   45.90    8.71   0
  -8  24   0   44.04    8.70   0
  -7 -26  -4   69.36    8.66   0
  -7 -26   2  148.16   10.43   0
  -7 -25   5    2.29    8.87   0
  -7 -24  -8    7.38    9.32   0
  -7 -22   9    2.37   11.17   0
  -7 -19 -13  -12.77    9.41   0
  -7 -16 -15   -5.05    6.77   0
  -7 -13 -16    9.29    9.68   0
  -7 -12  15    3.80    9.01   0
  -7 -10 -17    3.08    8.79   0
  -7  -8  16  147.03   10.65   0
  -7  -4 -18    8.95    7.40   0
  -7  -3 -18   32.93    7.93   0
  -7  -2 -18  101.08    7.91   0
  -7  -1 -18    4.76    7.67   0
  -7   4  16    9.69    7.83   0
  -7   6 -17    3.74    8.38   0
  -7   8  15   -3.95    8.53   0
  -7  11  14   39.85    7.79   0
  -7  13  13    3.22    8.29   0
  -7  16  11    9.32    7.61   0
  -7  18 -11   17.79   19.30   0
  -7  19 -10   -1.55   13.56   0
  -7  20   7    8.27    7.81   0
  -7  22  -5    6.79    7.98   0
  -7  22   3    0.50    5.71   0
  -6 -25  -2   -1.07    6.43   0
  -6 -25  -1   -0.58    7.80   0
  -6 -25   0    4.63    7.65   0
  -6 -24  -5    5.35    9.04   0
  -6 -24   4    3.61    6.85   0
  -6 -23  -7   80.74    8.78   0
  -6 -22  -9   -3.39    6.19   0
  -6 -21 -10   28.45    6.29   0
  -6 -20 -11   -9.40    6.10   0
  -6 -19  10   71.03   15.08   0
  -6 -17 -13   17.25    7.88   0
  -6 -15 -14   98.59    9.41   0
  -6 -13 -15  188.38    7.62   0
  -6 -10 -16   12.20    6.74   0
  -6  -7  15   -1.37    7.24   0
  -6  -3 -17   30.98    6.25   0
  -6  -2 -17    4.80    6.24   0
  -6  -1 -17   90.35    7.47   0
  -6   3  15   37.95    5.65   0
  -6   4  15   12.49    6.79   0
  -6   6 -16    2.50    8.03   0
  -6   8  14   16.10    6.90   0
  -6   9 -15  219.30   10.33   0
  -6  10  13   11.91    5.76   0
  -6  14  11    0.38    8.31   0
  -6  19   6  314.98    8.01   0
  -6  20  -6    2.21    7.45   0
  -6  21  -3    4.51    7.05   0
  -6  21   1   16.61    5.99   0
  -6  21   2   28.46    7.31   0
  -5 -23  -3   -0.79    7.71   0
  -5 -23   1    6.25    7.80   0
  -5 -22  -6    4.81    6.74   0
  -5 -21   6    0.43    6.57   0
  -5 -20  -9   12.12    5.62   0
  -5 -19 -10    7.03    5.73   0
  -5 -18   9   34.98   12.20   0
  -5 -16 -12   -2.58    7.47   0
  -5 -14 -13    0.23    7.46   0
  -5 -12 -14   17.53    7.33   0
  -5  -9 -15   13.80    5.63   0
  -5  -8 -15  118.75    8.16   0
  -5  -6  14    6.76    7.09   0
  -5   2  14    0.64    7.67   0
  -5   5 -15   12.99    7.45   0
  -5   7  13  206.03    7.31   0
  -5   8 -14    2.38    9.70   0
  -5  13  10   18.49    4.66   0
  -5  17  -8   16.76   10.35   0
  -5  18   5   48.96    6.80   0
  -5  19   3   62.49    6.41   0
  -4 -21  -3   14.55    7.26   0
  -4 -20  -6   37.85    5.55   0
  -4 -20   4   30.95    8.02   0
  -4 -19  -7   17.76    7.47   0
  -4 -16 -10   21.90    7.05   0
  -4 -15 -11    4.09    5.41   0
  -4 -13 -12   -1.46    4.94   0
  -4 -12  11    3.24    9.26   0
  -4 -10 -13   35.11    7.75   0
  -4  -9  12   10.59    7.02   0
  -4  -7 -14   20.53    5.40   0
  -4  -6 -14   30.99    7.18   0
  -4   3 -14    6.36    6.10   0
  -4   5  12   19.07    7.35   0
  -4   8  11   17.00    7.71   0
  -4   9 -12   14.16    7.67   0
  -4  10  10   84.38    5.91   0
  -4  13   8   -3.32    4.96   0
  -4  14   7  101.97    5.77   0
  -4  15   6   12.32    6.79   0
  -4  17   3    9.87    7.19   0
  -3 -19  -2   32.04    4.81   0
  -3 -19  -1  150.91    7.74   0
  -3 -19   0   24.68    6.47   0
  -3 -18  -5   13.66    4.96   0
  -3 -18   3   -0.70    8.18   0
  -3 -13 -10   15.05    4.86   0
  -3 -11 -11  139.53    6.05   0
  -3  -8 -12  169.43    7.55   0
  -3  -6  11   37.00    7.57   0
  -3   1  11   15.11    5.17   0
  -3   2  11   49.25    7.34   0
  -3   4 -12  119.01    8.21   0
  -3   6  10  291.76    8.64   0
  -3   7 -11    3.00    6.29   0
  -3   8   9   30.42    4.80   0
  -3  10   8  308.04    8.27   0
  -3  11   7  133.30    5.69   0
  -3  13   5   57.81    5.20   0
  -3  14   4   46.40    6.54   0
  -3  15  -3    3.66    7.27   0
  -3  15   1    3.01    4.96   0
  -2 -16  -2   76.94    7.56   0
  -2 -16  -1   13.27    7.09   0
  -2 -16   0    5.11    7.08   0
  -2 -15   3  524.31   11.14   0
  -2 -14  -6   18.82    6.36   0
  -2 -13  -7  167.89    7.28   0
  -2 -12  -8   49.55    5.14   0
  -2 -10  -9    6.63    4.90   0
  -2  -7 -10    4.06    6.87   0
  -2  -5   9  380.94   10.77   0
  -2   1   9 1119.28   13.72   0
  -2   5   8  191.74    8.52   0
  -2   6  -9   14.50    7.78   0
  -2   7   7  151.95    6.00   0
  -2  12  -3    1.02    7.25   0
  -1 -12  -2  355.30    9.34   0
  -1 -12  -1  947.21   12.94   0
  -1 -12   0  947.21   13.31   0
  -1 -11  -4  206.30    8.15   0
  -1 -10  -5   75.88    7.26   0
  -1  -9  -6   50.17    6.59   0
  -1  -7  -7   92.10    7.58   0
  -1  -3  -8  148.55    6.33   0
  -1  -2  -8  104.82    7.66   0
  -1  -1  -8   12.84    7.35   0
  -1   2   6  168.53    9.55   0
  -1   6   4  164.80   10.08   0
  -1   7   3  661.06   13.06   0
  -1   8  -3  360.23   16.54   0
   0  -4  -1    0.66   11.30   0
   0  -3  -2    2.69   11.39   0
   0  -1  -2    0.01   11.17   0
  -9   3  18    3.01   10.70   0
  -9   4  18   13.22    9.69   0
  -9   8  17   18.46    8.12   0
  -9  11  16   42.37    6.98   0
  -9  17  13  137.00    7.67   0
  -9  23   7   12.07    7.11   0
  -9  24   5   51.17    6.95   0
  -9  25  -4   18.22   12.05   0
  -9  25   2   -3.87    7.15   0
  -9  25   3   74.71    9.34   0
  -8 -25   7   -1.82   10.62   0
  -8 -15  15    1.07   11.09   0
  -8 -12  16   12.50    8.92   0
  -8  -8 -18   12.57   11.50   0
  -8  -8  17   13.35    8.78   0
  -8   4  17   99.36    7.58   0
  -8   5 -18    4.60    9.85   0
  -8   5  17    5.05    8.96   0
  -8   9 -17   11.06    9.39   0
  -8   9  16    0.46    8.88   0
  -8  17  12   18.66    8.32   0
  -8  18  11  131.71    6.87   0
  -8  21   8    7.38    6.24   0
  -8  22  -8    8.07   11.33   0
  -8  22   7   -0.60    7.49   0
  -8  23   5   11.83    8.16   0
  -8  24  -3   29.12    8.67   0
  -8  24   1   38.46    6.64   0
  -8  24   2   20.97    8.08   0
  -7 -26  -3   11.35    7.45   0
  -7 -26  -2  174.98   10.70   0
  -7 -26  -1   12.56    9.21   0
  -7 -26   0  178.06   10.88   0
  -7 -26   1    5.56    9.75   0
  -7 -25  -6   59.37    7.52   0
  -7 -23  -9   15.43    9.09   0
  -7 -22 -10   54.73    9.50   0
  -7 -21 -11    8.96    9.28   0
  -7 -20 -12   63.32    7.56   0
  -7 -17 -14   66.71    7.44   0
  -7 -15 -15   20.37    7.33   0
  -7 -12 -16   37.88   10.33   0
  -7  -9 -17   11.97    7.22   0
  -7   5 -17    3.37    9.99   0
  -7   5  16   31.35    8.44   0
  -7   9 -16   16.69    9.19   0
  -7   9  15   17.52    7.89   0
  -7  15  12   47.10    6.29   0
  -7  19   9   49.86    7.83   0
  -7  21   6   23.05    6.46   0
  -7  22   4   74.11    6.61   0
  -7  23  -2   10.74    7.18   0
  -7  23  -1    5.78    8.59   0
  -7  23   0    5.55    8.77   0
  -7  23   1   10.65    7.93   0
  -6 -24  -4   -3.13    7.98   0
  -6 -22  -8   24.49    8.69   0
  -6 -22   7    2.12    7.64   0
  -6 -19 -11  164.45    8.67   0
  -6 -18 -12   29.96    6.40   0
  -6 -12 -15  -12.96    7.58   0
  -6  -9 -16   30.95    6.33   0
  -6  -8 -16   14.36    8.74   0
  -6  -8  15   -0.11    6.78   0
  -6   5 -16  274.63   10.54   0
  -6   5  15  222.47    8.86   0
  -6  11 -14   57.37    9.86   0
  -6  11  13   15.20    7.45   0
  -6  13 -13  127.68   12.87   0
  -6  13  12   95.44    7.48   0
  -6  16  10   14.01    7.64   0
  -6  17   9   25.89    7.76   0
  -6  18   8    8.93    8.03   0
  -6  19  -8  122.71   11.81   0
  -6  19   7  165.88    7.77   0
  -6  20   5   39.88    6.00   0
  -6  21  -4   64.23    7.59   0
  -6  21   3    5.39    7.77   0
  -5 -23  -2   19.27    5.52   0
  -5 -23  -1    0.97    6.89   0
  -5 -23   0   49.31    7.09   0
  -5 -22  -5   75.37    8.13   0
  -5 -22   4   12.09    6.33   0
  -5 -21  -7  129.97    6.14   0
  -5 -20  -8   39.15    8.18   0
  -5 -20   7   23.68    7.59   0
  -5 -18 -10   17.36    7.58   0
  -5 -17 -11  158.60    8.10   0
  -5 -11 -14   22.86    6.98   0
  -5  -7 -15  307.49    8.62   0
  -5  -7  14    4.20    7.53   0
  -5   3  14   -9.39    5.67   0
  -5   4 -15   33.27    8.76   0
  -5   4  14    7.28    6.59   0
  -5  10  12    5.51    4.89   0
  -5  12  11   64.74    6.71   0
  -5  15   9   76.09    6.78   0
  -5  16   8   15.64    6.29   0
  -5  17   7  237.79    7.78   0
  -4 -21  -2   27.17    5.71   0
  -4 -21  -1   23.32    7.18   0
  -4 -21   0   35.41    7.19   0
  -4 -21   1   17.64    5.13   0
  -4 -20  -5   45.09    7.05   0
  -4 -18  -8  301.07    7.27   0
  -4 -17  -9    6.50    5.15   0
  -4 -14 -11   98.74    7.43   0
  -4 -12 -12    8.02    7.07   0
  -4  -5 -14   -1.07    5.82   0
  -4  -4 -14  210.34    7.93   0
  -4  -4  13   85.41    7.35   0
  -4  -3  13   -0.10    6.82   0
  -4  -2  13   14.49    5.21   0
  -4  -1  13   12.63    5.32   0
  -4   0  13   11.16    6.78   0
  -4   1 -14    4.57    6.60   0
  -4   1  13   11.00    6.81   0
  -4   2 -14   19.97    4.97   0
  -4   6 -13   12.63    7.92   0
  -4   6  12  217.82    8.43   0
  -4   9  11    0.04    6.92   0
  -4  12   9   -2.91    5.57   0
  -4  16   5    6.97    5.74   0
  -3 -18  -4   -4.73    6.63   0
  -3 -17  -6   77.79    5.61   0
  -3 -16  -7   27.14    6.94   0
  -3 -15  -8   41.70    6.80   0
  -3 -14  -9   10.98    4.99   0
  -3 -12 -10   84.36    7.68   0
  -3 -10 -11   70.83    7.19   0
  -3  -7 -12  220.38    6.94   0
  -3  -6 -12  244.33    9.09   0
  -3   3 -12  154.03    8.28   0
  -3   3  11   22.79    7.33   0
  -3  15   2  107.69    5.83   0
  -2 -15  -4   38.17    5.35   0
  -2 -11  -8   40.23    6.33   0
  -2  -9  -9  662.23    9.85   0
  -2  -9   8   61.85   11.67   0
  -2  -6 -10    0.04    6.23   0
  -2   2   9    5.84    5.10   0
  -2   3 -10  160.08    7.78   0
  -2   9   6   27.16    5.40   0
  -2  10   5   24.19    5.33   0
  -2  11   4   31.85    7.54   0
  -2  12   2  126.81    6.49   0
  -1 -11  -3  808.06   11.58   0
  -1  -8  -6  147.78    7.85   0
  -1  -6  -7   26.36    7.01   0
  -1  -6   6   46.70   11.93   0
  -1   3  -7  130.82    9.27   0
  -1   5  -6   18.49   10.89   0
  -1   5   5   72.59    9.34   0
  -1   8   2   19.77    9.47   0
   0  -3  -1   23.79   11.46   0
   0  -2  -2  753.59   17.09   0
  -9   5  18    9.31   11.44   0
  -9   9  17    6.79    8.19   0
  -9  14  15   -1.07    7.98   0
  -9  16  14    2.96    7.81   0
  -9  19  12   17.35   10.53   0
  -9  20  11   38.03    7.45   0
  -9  21  10   12.75    7.40   0
  -9  22   9   -3.60   10.71   0
  -9  24   6   10.25   10.28   0
  -9  25   4   -5.10    9.86   0
  -8 -27   0   -2.29   11.17   0
  -8 -27   1   12.89   11.35   0
  -8 -26   5    5.92    9.40   0
  -8 -22 -11   -8.91   11.50   0
  -8 -18 -14   24.78   11.02   0
  -8 -14 -16   -7.24   10.87   0
  -8 -11 -17   -6.84   11.26   0
  -8  -9  17  -12.75   10.23   0
  -8  -7 -18   -0.52    9.94   0
  -8  -6 -18   23.72   10.98   0
  -8   4 -18   79.43   10.20   0
  -8  10  16    2.40    9.18   0
  -8  12  15   28.44    7.20   0
  -8  14  14   19.58    6.69   0
  -8  16  13   -1.15    9.48   0
  -8  20  10    3.01    8.96   0
  -8  23   6    1.64    8.49   0
  -8  24  -4   -2.88    8.23   0
  -8  24   3   29.56    9.11   0
  -7 -25  -5   -7.69    7.00   0
  -7 -25   4   71.59   10.17   0
  -7 -24  -7   -1.45    8.71   0
  -7 -24   6   21.61   10.12   0
  -7 -18 -13   17.21    7.31   0
  -7 -15  14   16.88   12.70   0
  -7 -14 -15   18.23    9.98   0
  -7 -11 -16   14.14   10.12   0
  -7  -9  16   -1.15    8.64   0
  -7  -8 -17    3.23    7.38   0
  -7  -7 -17    2.01    9.25   0
  -7   6  16   97.48    8.86   0
  -7  10  15   16.18    7.99   0
  -7  12  14   83.09    6.52   0
  -7  14  13   23.58    6.23   0
  -7  17  11   -9.89    5.93   0
  -7  18  10   43.73    6.09   0
  -7  20  -9    1.94   11.51   0
  -7  20   8   40.11    6.38   0
  -7  21   7    1.65    7.53   0
  -7  22   5   10.11    8.13   0
  -7  23  -3    0.23    7.30   0
  -7  23   2    3.04    8.13   0
  -6 -24  -3   19.16    8.65   0
  -6 -24   2   -0.12    8.02   0
  -6 -23  -6   14.48    6.12   0
  -6 -23   5   50.05    9.76   0
  -6 -21  -9    2.60    5.90   0
  -6 -21   8   17.50    8.92   0
  -6 -20 -10   -7.28    6.47   0
  -6 -20   9   13.72   10.95   0
  -6 -16 -13    0.05    6.23   0
  -6 -14 -14    5.48    6.26   0
  -6 -12  14    2.29    8.62   0
  -6 -11 -15   26.71    7.92   0
  -6  -7 -16   32.74    7.76   0
  -6   4 -16    1.31    7.81   0
  -6   6  15    2.68    7.51   0
  -6   9  14  155.40    6.21   0
  -6  15  11   90.56    5.95   0
  -6  20   6   -7.79    6.78   0
  -5 -22  -4    1.02    7.94   0
  -5 -21  -6   10.23    7.61   0
  -5 -19  -9   -1.80    5.54   0
  -5 -19   8    4.87    8.44   0
  -5 -15 -12   12.38    5.61   0
  -5 -13 -13   53.59    6.10   0
  -5 -10 -14   27.10    7.48   0
  -5  -6 -15  126.79    7.84   0
  -5  -5 -15   22.61    8.20   0
  -5   3 -15  262.99   10.70   0
  -5   5  14   20.85    7.55   0
  -5   8  13   96.72    5.90   0
  -5  10 -13   12.53    9.29   0
  -5  11  12   20.70    6.50   0
  -5  12 -12   35.78   10.62   0
  -5  14  10   21.03    5.28   0
  -5  18   6  134.42    7.84   0
  -5  19  -5   35.92    7.56   0
  -5  19   4   12.62    5.04   0
  -5  20  -2   20.70    7.36   0
  -5  20  -1   42.08    7.41   0
  -5  20   0   56.03    7.93   0
  -5  20   1   31.10    7.77   0
  -4 -20  -4   31.30    7.47   0
  -4 -19  -6    7.56    6.65   0
  -4 -15 -10   19.77    6.89   0
  -4 -11 -12    2.01    6.68   0
  -4  -9 -13    6.49    5.36   0
  -4  -8 -13   12.70    6.73   0
  -4  -5  13    1.04    6.74   0
  -4  -3 -14    6.96    4.92   0
  -4  -2 -14   19.95    5.07   0
  -4  -1 -14    6.19    4.97   0
  -4   2  13   13.51    4.76   0
  -4   3  13    6.17    6.02   0
  -4   7  12   11.52    7.05   0
  -4  11  10    2.17    5.29   0
  -4  13   9    6.75    6.90   0
  -4  14   8  451.13    9.47   0
  -4  15   7   40.97    7.38   0
  -4  16   6   41.74    7.04   0
  -4  17  -5  110.48    9.46   0
  -4  17   4   20.02    5.63   0
  -4  18  -2  334.81    9.73   0
  -4  18  -1   44.66    5.54   0
  -4  18   0  379.96    8.00   0
  -4  18   1   49.27    7.59   0
  -3 -18  -3   -2.34    6.82   0
  -3 -17  -5   12.45    7.30   0
  -3 -13  -9   13.47    7.57   0
  -3 -10  10   42.05    9.28   0
  -3  -9 -11   42.23    7.87   0
  -3  -7  11    1.48    7.17   0
  -3  -5 -12    4.45    7.12   0
  -3   2 -12  247.34    8.95   0
  -3   4  11   26.35    7.12   0
  -3   7  10  358.93    7.38   0
  -3   9   9    3.85    4.99   0
  -3  11   8  323.36    8.49   0
  -3  12   7  119.12    5.58   0
  -3  13  -7   45.08   12.18   0
  -3  13   6  241.30    6.55   0
  -3  14   5  174.37    7.77   0
  -3  15  -4    6.46    8.45   0
  -3  15   3    9.28    5.02   0
  -2 -15  -3  535.67    9.58   0
  -2 -14  -5    5.43    4.62   0
  -2 -14   4    0.49    6.13   0
  -2 -13  -6   14.41    6.18   0
  -2 -12  -7    0.82    4.64   0
  -2 -12   6  115.88   11.67   0
  -2  -8  -9    1.71    6.66   0
  -2  -6   9   12.68    6.31   0
  -2  -5 -10  329.43    7.37   0
  -2  -4 -10    3.16    6.79   0
  -2   2 -10    5.17    6.68   0
  -2   3   9  154.30    6.35   0
  -2   6   8    6.24    5.02   0
  -2   8   7    6.42    5.14   0
  -2  12   3    1.48    7.22   0
  -1 -10  -4  342.74    9.18   0
  -1  -9  -5    5.73    6.84   0
  -1  -5  -7   -3.43    7.18   0
  -1   2  -7   34.80    9.54   0
  -1   3   6  118.26    6.99   0
  -1   9   0    5.73    8.31   0
  -9  15  15  -11.73   12.09   0
  -9  18  13   -7.31    7.81   0
  -9  23   8    0.03    8.46   0
  -9  24  -7   -7.58   11.54   0
  -9  24   7  -12.61   10.13   0
  -8 -26  -5    3.93    8.18   0
  -8 -26   4   18.39   11.90   0
  -8 -25  -7    4.64    7.91   0
  -8 -24   8    0.93   11.64   0
  -8 -19 -13    1.36   10.90   0
  -8 -16 -15   -0.15    7.71   0
  -8  -5 -18   -5.67    8.96   0
  -8  -4 -18   26.48   10.38   0
  -8  -2  18   -7.10    8.91   0
  -8  -1  18   -7.92    9.29   0
  -8   2 -18   -8.11    9.63   0
  -8   3 -18   -1.42    8.54   0
  -8   7  17   -7.72    9.57   0
  -8   8 -17   14.71   10.70   0
  -8  13  15    1.05    9.69   0
  -8  15  14   -0.78    9.95   0
  -8  19  11   -0.08    7.25   0
  -8  21   9   12.12    7.22   0
  -8  22   8  -11.86   10.10   0
  -8  24   4   -7.50   10.13   0
  -7 -24  -6   13.04    9.90   0
  -7 -23  -8    2.12    7.11   0
  -7 -22  -9    5.80    9.54   0
  -7 -20 -11    8.44    8.46   0
  -7 -19 -12    2.04    7.03   0
  -7 -13 -15    8.51    9.17   0
  -7 -10 -16   -6.02    8.26   0
  -7  -6 -17    4.06    7.58   0
  -7  -5 -17   -7.69    8.68   0
  -7  -3  17    8.87    8.98   0
  -7  -2  17  -18.42    9.02   0
  -7  -1  17    0.23    8.81   0
  -7   0  17    1.24    9.04   0
  -7   1  17    5.39    9.23   0
  -7   3 -17   -9.35    9.20   0
  -7   4 -17    3.49    6.31   0
  -7   8 -16  109.16   11.91   0
  -7  11 -15    0.44   11.29   0
  -7  13  14    4.02    7.52   0
  -7  23   3   -5.50    8.55   0
  -6 -24  -2    7.37    7.50   0
  -6 -24  -1   35.42    8.79   0
  -6 -24   0   13.79    8.20   0
  -6 -24   1    4.28    8.95   0
  -6 -22  -7    3.25    5.90   0
  -6 -21  -8    6.88    8.23   0
  -6 -18 -11   -2.70    7.84   0
  -6 -17 -12   10.03    5.99   0
  -6 -10 -15    9.19    8.13   0
  -6  -6 -16   -2.45    6.47   0
  -6  -2  16    5.26    7.52   0
  -6  -1  16    1.33    8.05   0
  -6   0  16    9.88    7.81   0
  -6   1  16   -4.37    7.09   0
  -6   7  15    9.97    7.89   0
  -6   8 -15   -6.55    7.64   0
  -6  10  14   -5.75    7.91   0
  -6  12  13   -8.56    5.79   0
  -6  14  12   -5.61    5.80   0
  -6  17  10   48.60    7.62   0
  -6  18   9   -6.12    7.59   0
  -6  19   8  101.05    7.79   0
  -6  21  -5    0.14    7.02   0
  -6  22  -2   10.20    8.42   0
  -6  22  -1    5.50    7.75   0
  -6  22   0   18.22    7.91   0
  -6  22   1    4.07    7.72   0
  -5 -21   5  136.30    9.09   0
  -5 -20  -7   11.59    7.60   0
  -5 -17 -10   16.55    7.40   0
  -5 -16 -11   81.25    5.82   0
  -5 -14 -12  -14.58    7.86   0
  -5 -12 -13  155.35    8.10   0
  -5  -9 -14   20.80    7.95   0
  -5  -8  14   -2.47    7.62   0
  -5  -4 -15   13.61    8.07   0
  -5  -3 -15  262.54   10.15   0
  -5  -2 -15  125.27    9.46   0
  -5   0 -15   -0.73    8.06   0
  -5   1 -15  129.35    9.50   0
  -5   2 -15  145.08    8.84   0
  -5   6  14    2.06    7.52   0
  -5   7 -14    3.94    8.25   0
  -5  13  11   -2.93    5.08   0
  -5  16   9  116.93    7.83   0
  -5  17   8    4.93    7.13   0
  -5  18  -7   25.14    9.75   0
  -5  19   5   42.13    7.18   0
  -5  20  -3   52.05    7.22   0
  -5  20   2   11.65    5.96   0
  -4 -19  -5    8.94    6.39   0
  -4 -19   5    6.51    6.03   0
  -4 -18  -7   97.25    5.74   0
  -4 -17  -8    3.14    4.85   0
  -4 -16  -9    0.87    4.60   0
  -4 -13 -11    2.88    4.38   0
  -4 -10  12  386.86   13.22   0
  -4  -7 -13   10.01    6.81   0
  -4  -6  13    8.14    6.67   0
  -4   4  13   57.21    7.54   0
  -4   5 -13   -1.73    6.85   0
  -4   8  12   33.82    6.51   0
  -4  10  11   18.54    6.98   0
  -4  12  10    9.18    6.77   0
  -4  17   5  123.65    7.54   0
  -4  18  -3  138.98    8.04   0
  -4  18   2  332.85    7.51   0
  -3 -18  -2  102.43    6.35   0
  -3 -18  -1   -0.52    8.08   0
  -3 -18   0  216.44    9.28   0
  -3 -18   1    9.04    7.71   0
  -3 -17  -4  102.65    7.60   0
  -3 -17   4   85.52    7.77   0
  -3 -16  -6  371.00    8.02   0
  -3 -15  -7   13.42    7.79   0
  -3 -11 -10  144.24    6.83   0
  -3  -8 -11   16.77    6.95   0
  -3  -4 -12  111.63    5.97   0
  -3  -3 -12  162.15    8.05   0
  -3  -2 -12  244.50    8.68   0
  -3  -1 -12   30.05    7.23   0
  -3   0 -12    0.93    6.65   0
  -3   1 -12   26.00    7.31   0
  -3   5  11   -7.31    7.05   0
  -3   6 -11   23.09    6.85   0
  -3   8  10  327.48    8.62   0
  -3  10   9   15.24    6.66   0
  -3  15   4    6.45    7.08   0
  -3  16  -1    9.91    7.04   0
  -3  16   0  451.07   10.01   0
  -3  16   1    8.48    7.06   0
  -2 -15  -2   -2.44    4.85   0
  -2 -15  -1  386.03    9.35   0
  -2 -15   0   14.30    6.96   0
  -2 -15   1  389.77    9.42   0
  -2 -14  -4  -13.45    6.72   0
  -2 -13   5  407.33   13.12   0
  -2 -11  -7  185.58    7.74   0
  -2 -10  -8   -0.09    4.58   0
  -2  -7  -9    4.84    6.51   0
  -2  -3 -10  166.63    6.25   0
  -2  -2 -10   -1.30    6.71   0
  -2  -1 -10   26.50    6.84   0
  -2   0 -10   78.64    7.27   0
  -2   1 -10   28.97    4.92   0
  -2   4   9    2.32    4.82   0
  -2   5  -9  364.69   12.17   0
  -2   7   8   39.24    7.05   0
  -2   9  -7  543.34   30.57   0
  -2  10   6   31.16    7.08   0
  -2  11   5  234.41    8.47   0
  -2  12  -4   40.56    7.52   0
  -2  13  -1  773.94   12.50   0
  -2  13   0   14.10    5.49   0
  -2  13   1  770.07   11.73   0
  -1 -11  -2  658.73   10.10   0
  -1 -11  -1  947.46   13.27   0
  -1 -10   3  119.55   10.63   0
  -1  -7  -6  171.26    6.62   0
  -1  -4  -7  123.49    6.44   0
  -1  -2   7   30.84    8.24   0
  -1  -1   7   48.70    8.49   0
  -1   0   7   -3.08    8.45   0
  -1   4   6   77.15    8.91   0
  -1   6   5   40.80    8.74   0
  -1   7   4  203.53    8.21   0
  -1   8   3  371.48   11.01   0
  -1   9  -1   77.64    9.56   0
  -1   9   1   76.56    8.75   0
  -9  26  -2    2.09    9.49   0
  -9  26  -1    6.28   11.38   0
  -9  26   0   -2.55    8.00   0
  -9  26   2   -2.94    9.83   0
  -8 -26  -4   17.40    8.56   0
  -8 -25  -6   19.44    9.61   0
  -8 -25   6   27.76   11.11   0
  -8 -24  -8    1.96    8.11   0
  -8 -23  -9    8.70    9.34   0
  -8 -22 -10   17.64    9.77   0
  -8 -21 -11   35.19    9.50   0
  -8 -20 -12   23.39    8.92   0
  -8 -17 -14    7.77    8.53   0
  -8 -15 -15   -0.69    8.48   0
  -8 -13 -16    0.61    7.17   0
  -8 -13  16   -0.80   10.62   0
  -8 -10  17   28.23   12.25   0
  -8  -9 -17   21.24    9.28   0
  -8  -4  18   63.66   10.13   0
  -8  -3 -18   -2.17    7.00   0
  -8  -3  18    4.93    9.37   0
  -8  -2 -18   10.83    8.69   0
  -8  -1 -18    0.80    8.76   0
  -8   0 -18   16.25    9.38   0
  -8   1 -18    9.04    8.76   0
  -8   1  18  -10.31    7.68   0
  -8   2  18    5.84    9.74   0
  -8   3  18   -1.50    8.39   0
  -8   8  17   27.52   10.06   0
  -8  11 -16    4.66   10.43   0
  -8  11  16   -0.88    7.19   0
  -8  23  -7   14.03    9.10   0
  -8  23   7    1.79   10.39   0
  -8  24  -5   32.74    9.11   0
  -8  25  -1   15.53    8.46   0
  -8  25   1   16.62    9.51   0
  -7 -25  -3   10.79    6.89   0
  -7 -25  -2   57.93    9.19   0
  -7 -25   2   49.27    8.59   0
  -7 -23  -7   30.67    9.00   0
  -7 -18 -12   14.40    8.72   0
  -7 -17 -13    6.48    6.69   0
  -7 -15 -14   40.69    6.63   0
  -7 -13  15    1.86   10.12   0
  -7 -10  16    0.91    9.10   0
  -7  -9 -16   25.70    8.91   0
  -7  -5  17    6.17    8.49   0
  -7  -4 -17    6.49    6.53   0
  -7  -4  17   -0.77    6.51   0
  -7  -3 -17   -0.15    8.88   0
  -7  -2 -17    0.08    8.65   0
  -7  -1 -17   -8.71    8.92   0
  -7   0 -17    3.43    8.89   0
  -7   1 -17    2.43    8.97   0
  -7   2 -17   -1.60    8.05   0
  -7   2  17   -4.75    6.47   0
  -7   3  17   -6.35    8.81   0
  -7   4  17   -2.58    7.85   0
  -7  11  15    1.75    6.49   0
  -7  15 -13    0.70   13.19   0
  -7  15  13   -4.13    6.07   0
  -7  17  12  102.70    8.60   0
  -7  18  11   -1.15    6.50   0
  -7  19  10    3.76    6.27   0
  -7  20   9   -9.79    6.35   0
  -7  23  -4    7.46    7.93   0
  -7  23   4  -10.80    8.49   0
  -6 -23  -4   24.19    8.42   0
  -6 -23   4   33.34    8.10   0
  -6 -22  -6    4.97    8.31   0
  -6 -20  -9   -0.65    6.68   0
  -6 -19 -10   90.53    6.79   0
  -6 -16 -12   12.74    8.34   0
  -6 -12 -14   -0.09    7.58   0
  -6  -9 -15  217.19    8.66   0
  -6  -4 -16    4.73    5.91   0
  -6  -4  16    0.76    7.87   0
  -6  -3 -16  112.86    7.95   0
  -6  -2 -16   -0.09    7.69   0
  -6  -1 -16   18.68    7.71   0
  -6   0 -16   21.52    7.69   0
  -6   1 -16   11.08    7.86   0
  -6   2 -16   -3.90    6.99   0
  -6   2  16    0.40    5.69   0
  -6   8  15    3.97    7.58   0
  -6  11  14   39.64    7.03   0
  -6  13  13  151.93    8.80   0
  -6  16  11   -0.16    5.66   0
  -6  20  -7    7.31    9.58   0
  -6  20   7   15.37    7.85   0
  -6  21   5   -2.27    5.49   0
  -6  22   2    8.45    5.86   0
  -6  22   3    9.51    6.86   0
  -5 -22  -2    5.56    5.24   0
  -5 -22  -1   55.36    8.10   0
  -5 -22   0   12.33    7.60   0
  -5 -22   1   59.34    8.01   0
  -5 -22   2   -3.94    5.84   0
  -5 -21  -5  128.27    6.29   0
  -5 -19  -8    3.54    5.27   0
  -5 -15 -11  104.95    8.34   0
  -5  -8 -14    0.91    8.31   0
  -5  -3  15  246.39    9.66   0
  -5  -1 -15  107.86    7.12   0
  -5   0  15   -3.50    7.87   0
  -5   1  15  107.53    8.96   0
  -5   7  14   12.04    7.83   0
  -5  10  13   13.94    8.08   0
  -5  12  12   28.65    7.51   0
  -5  14  11   17.12    7.26   0
  -5  15  10   50.55    5.72   0
  -5  18   7   10.82    5.60   0
  -4 -20  -2  102.96    5.72   0
  -4 -20  -1  129.34    7.16   0
  -4 -20   0  306.29    8.67   0
  -4 -20   1  115.09    7.57   0
  -4 -18  -6  300.21    8.31   0
  -4 -15  -9   -0.83    6.91   0
  -4 -14 -10   96.37    5.11   0
  -4 -12 -11   19.63    6.16   0
  -4 -10 -12  371.54    7.38   0
  -4  -7  13   11.31    7.57   0
  -4  -6 -13   18.14    6.87   0
  -4   5  13   -8.93    6.92   0
  -4   8 -12   26.04    8.34   0
  -4  14   9   67.30    6.57   0
  -4  15   8    8.05    6.59   0
  -4  16   7   20.81    6.24   0
  -4  18   3  154.27    5.67   0
  -3 -16  -5   25.44    6.95   0
  -3 -12  -9  255.25    6.65   0
  -3 -10 -10   52.27    6.79   0
  -3  -7 -11    4.79    6.63   0
  -3  -2  12  262.21    9.10   0
  -3  -1  12   24.84    7.09   0
  -3   0  12   -3.81    6.94   0
  -3   1  12   34.07    6.61   0
  -3   6  11   34.02    7.06   0
  -3  12   8  272.45    8.61   0
  -3  13   7   51.00    7.06   0
  -3  14  -6    8.99    8.25   0
  -3  14   6   22.86    6.71   0
  -3  16  -2  263.95    8.73   0
  -3  16   2  269.66    8.46   0
  -2 -14  -3    2.53    6.59   0
  -2 -13  -5  388.50    7.53   0
  -2 -12  -6  110.80    5.44   0
  -2  -9  -8   76.02    6.42   0
  -2  -7   9   13.75    8.21   0
  -2  -6  -9    9.49    6.51   0
  -2  -1  10   25.20    6.93   0
  -2   0  10   87.18    6.89   0
  -2   5   9  378.42    7.70   0
  -2   9   7  506.17    8.29   0
  -2  12   4   37.08    5.26   0
  -2  13  -2   92.25    7.92   0
  -2  13   2   99.23    5.95   0
  -1 -11   0  685.90   11.23   0
  -1 -10  -3  119.96    5.93   0
  -1  -9  -4   78.72    8.08   0
  -1  -9   4   76.11   12.24   0
  -1  -8  -5  239.64    7.28   0
  -1  -6  -6   53.14    8.29   0
  -1  -3  -7  111.23    6.18   0
  -1  -3   7  136.00    9.39   0
  -1  -2  -7   31.38    7.92   0
  -1  -1  -7   53.22    7.65   0
  -1   0  -7   -0.34    7.16   0
  -1   1  -7   43.91    5.74   0
  -1   1   7   45.63    8.39   0
  -1   5   6   21.38    8.01   0
  -1   9  -2    6.86    8.60   0
  -1   9   2   10.51    7.78   0
  -8 -26  -3   15.36    7.29   0
  -8 -26  -2    1.44    9.47   0
  -8 -26   2    8.47    9.42   0
  -8 -25  -5  -15.54    9.24   0
  -8 -24  -7   78.59    9.41   0
  -8 -23   9   -1.32   10.55   0
  -8 -18 -13  100.68    8.85   0
  -8 -16 -14  -10.17   10.40   0
  -8 -12 -16   36.05    6.80   0
  -8  -8 -17   14.97    9.10   0
  -8  -5  18   -6.62    9.87   0
  -8   5  18    7.20    8.87   0
  -8   7 -17    5.49    9.96   0
  -8   9  17   -6.66    9.41   0
  -8  12  16   25.81    9.24   0
  -8  14  15  128.38    8.03   0
  -8  16  14   -5.68    7.22   0
  -8  19  12    5.35   10.04   0
  -8  20  11   77.05    7.25   0
  -8  21  10   30.11    7.19   0
  -8  22   9   -6.05   10.01   0
  -8  24   6   -7.24    8.87   0
  -8  25  -2   33.06    9.94   0
  -8  25   2   48.55    7.27   0
  -8  25   3   -3.26    9.74   0
  -7 -25  -1   -0.95    6.00   0
  -7 -25   0   43.39    7.54   0
  -7 -25   1    4.39    7.20   0
  -7 -24  -5    8.23    6.20   0
  -7 -24   5    8.74    7.40   0
  -7 -23   7   31.19    8.00   0
  -7 -22  -8   17.95    7.49   0
  -7 -21  -9    5.55    8.07   0
  -7 -20 -10   17.34    8.86   0
  -7 -19 -11   37.61    7.75   0
  -7 -16 -13   -4.38    8.07   0
  -7 -14 -14   18.67    9.02   0
  -7 -12 -15    4.57    6.47   0
  -7  -6  17    0.51    8.04   0
  -7   5  17   -5.35    8.91   0
  -7   9  16   29.77    6.24   0
  -7  12  15   13.14    8.58   0
  -7  13 -14    0.21   10.52   0
  -7  14  14    5.76    6.64   0
  -7  16  13  -11.63    8.71   0
  -7  21  -8   12.48   10.69   0
  -7  22   7  -11.59    9.07   0
  -7  23   5    3.32    8.88   0
  -7  24  -1    3.54    7.84   0
  -7  24   0   19.96    8.26   0
  -7  24   1    0.42    8.57   0
  -7  24   2    5.45    8.78   0
  -6 -23  -3   88.94    8.40   0
  -6 -22   6   12.59    8.01   0
  -6 -21  -7    2.30    7.47   0
  -6 -17 -11   25.13    6.99   0
  -6 -14 -13   23.19    5.94   0
  -6 -10  15   -3.47    9.30   0
  -6  -8 -15  -10.65    7.05   0
  -6  -6  16    8.74    9.31   0
  -6   4  16   11.02    5.83   0
  -6   7 -15   -0.57    7.99   0
  -6  15  12   71.33    6.09   0
  -6  18  10   -4.63    6.76   0
  -6  21   6   13.08    7.93   0
  -6  22  -3    5.51    7.49   0
  -5 -21  -4    5.99    7.77   0
  -5 -21   4    1.52    8.95   0
  -5 -20  -6   67.68    6.35   0
  -5 -19  -7   11.08    8.36   0
  -5 -16 -10   33.10    8.05   0
  -5 -13 -12   85.36    6.55   0
  -5 -10 -13    3.63    8.22   0
  -5  -9  14   35.69    8.95   0
  -5  -7 -14   10.28    7.49   0
  -5  -4  15    7.19    8.72   0
  -5   2  15  151.65    7.35   0
  -5   6 -14    7.84    7.72   0
  -5   8  14   -6.68    8.86   0
  -5  19  -6    0.87    8.69   0
  -5  19   6   -0.15    5.19   0
  -5  20  -4   40.72    8.11   0
  -5  20   4   64.80    5.73   0
  -5  21   0   -7.04    7.07   0
  -4 -19  -4   20.02    5.05   0
  -4 -19   4   29.84    6.60   0
  -4 -18   6  302.73    9.71   0
  -4 -17  -7   10.08    4.96   0
  -4 -16  -8   21.19    5.01   0
  -4 -13 -10   -9.11    6.44   0
  -4  -9 -12    8.63    4.98   0
  -4  -5 -13    3.89    6.39   0
  -4   4 -13   69.91    6.99   0
  -4   6  13   -0.84    6.89   0
  -4   9  12    9.68    5.03   0
  -4  11  11    5.64    4.98   0
  -4  13  10   -1.80    6.79   0
  -4  15  -8    4.85   10.54   0
  -4  16  -7   10.14    9.66   0
  -4  17   6   32.29    6.82   0
  -4  18  -4  361.85   10.01   0
  -4  18   4  384.33    7.60   0
  -4  19   0    9.66    6.55   0
  -4  19   1    3.83    6.13   0
  -3 -17  -3   24.66    4.97   0
  -3 -17   3   25.92    6.79   0
  -3 -16   5   22.33    7.65   0
  -3 -15  -6   14.38    6.46   0
  -3 -14  -7  130.26    7.31   0
  -3 -13  -8  112.10    5.82   0
  -3 -11  -9  220.35    8.10   0
  -3  -9 -10   36.72    6.75   0
  -3  -8  11   16.78    7.60   0
  -3  -6 -11   44.86    7.18   0
  -3  -4  12  121.32    9.07   0
  -3  -3  12  145.04    8.31   0
  -3   2  12  226.21    8.90   0
  -3   3  12  145.49    7.47   0
  -3   5 -11   -1.32    7.25   0
  -3   7  11   -4.37    6.68   0
  -3   8 -10  334.06   13.21   0
  -3   9  10   25.97    4.95   0
  -3  11   9  204.71    8.22   0
  -3  15   5   16.77    5.10   0
  -3  16  -3    5.54    6.59   0
  -3  16   3   16.26    5.12   0
  -2 -14   3   10.57    6.18   0
  -2 -10  -7    4.17    6.53   0
  -2  -8  -8   11.51    6.70   0
  -2  -5  -9  372.94    8.94   0
  -2  -3  10  181.63    8.12   0
  -2  -2  10   10.04    6.48   0
  -2   1  10   29.90    5.01   0
  -2   2  10   -0.43    6.67   0
  -2   6   9   11.57    6.56   0
  -2   8   8   10.34    4.83   0
  -2  10   7   -2.88    6.18   0
  -2  11   6   13.00    6.74   0
  -2  12   5   -5.13    6.68   0
  -2  13   3  377.01    9.18   0
  -1 -10  -2  603.61   11.46   0
  -1  -5  -6   17.30    8.22   0
  -1   2   7   28.77    6.13   0
  -1   3   7  131.79    8.70   0
  -1   7   5  247.83    9.86   0
  -1   8   4   11.36    6.05   0
  -1   9   3   62.71    8.41   0
  -9  15 -15    3.92   14.70   0
  -8 -26  -1   -3.28    6.92   0
  -8 -26   0  -10.73    8.27   0
  -8 -26   1    0.75    8.31   0
  -8 -25   5    2.24   10.19   0
  -8 -23  -8   -1.20    8.81   0
  -8 -22  -9  -17.53    9.84   0
  -8 -22  10   -2.06   10.76   0
  -8 -21  11   -0.73   13.47   0
  -8 -19 -12   -4.02    7.52   0
  -8 -11 -16   10.13    7.43   0
  -8  -7 -17    2.59    8.70   0
  -8  -6  18   15.60   10.97   0
  -8   6 -17   -0.40   10.72   0
  -8   6  18   27.97   10.56   0
  -8  13 -15   -4.17   11.06   0
  -8  13  16    0.93    8.79   0
  -8  15  15   11.76    9.57   0
  -8  17  14   -3.76    8.60   0
  -8  23   8    6.33    7.20   0
  -8  24  -6    5.54   11.02   0
  -8  25  -3    0.75    9.44   0
  -7 -23  -6    1.06    6.18   0
  -7 -11 -15    2.38    7.85   0
  -7  -7  17   -0.31    7.55   0
  -7   6  17    4.00    8.36   0
  -7  10  16  -10.55    8.36   0
  -7  13  15   -1.49    7.87   0
  -7  15  14   18.87    8.16   0
  -7  21   9   -1.53    8.57   0
  -7  22  -7   -0.70   10.14   0
  -7  23  -5   -3.30    8.81   0
  -7  23   6   -5.83    8.77   0
  -7  24  -2    8.30    9.23   0
  -7  24   3   -1.84    9.10   0
  -6 -23  -2    2.06    7.31   0
  -6 -23  -1   88.49    8.62   0
  -6 -23   2   -1.78    7.75   0
  -6 -22  -5   -1.51    5.53   0
  -6 -20  -8   -1.87    6.14   0
  -6 -18 -10   -8.25    5.64   0
  -6  -7 -15   10.58    7.27   0
  -6   6 -15    6.07    8.96   0
  -6   6  16    5.23    8.52   0
  -6  10 -14    0.78    7.90   0
  -6  10  15   -7.81    7.56   0
  -6  12  14    7.11    5.75   0
  -6  14  13    3.40    5.68   0
  -6  16  12   12.52    7.67   0
  -6  17  11    7.32    5.63   0
  -6  20   8    6.29    5.71   0
  -6  21  -6   17.22    8.92   0
  -6  21   7  -11.63    7.00   0
  -6  22  -4   35.03    8.13   0
  -6  22   5    0.42    7.06   0
  -5 -14 -11   17.24    7.44   0
  -5 -12 -12   11.24    8.02   0
  -5 -12  13  134.71   11.30   0
  -5  -6 -14    2.64    6.91   0
  -5  -5  15   19.61    7.67   0
  -5   4  15    8.39    6.38   0
  -5   5 -14   -2.47    7.51   0
  -5   5  15   11.36    8.14   0
  -5   9 -13   36.49    9.11   0
  -5   9  14    9.23    8.05   0
  -5  21  -2   -3.87    8.85   0
  -5  21  -1  129.79    8.34   0
  -5  21   2   -2.38    8.06   0
  -4 -19  -3    0.12    6.01   0
  -4 -18  -5   87.09    6.91   0
  -4 -14  -9   61.85    7.24   0
  -4 -11 -11   -0.89    5.05   0
  -4  -8 -12   11.42    6.82   0
  -4  -3 -13   -5.97    6.57   0
  -4  -2 -13    1.32    6.69   0
  -4  -2  14   11.81    6.72   0
  -4  -1  14   10.28    7.07   0
  -4   0  14  593.73   10.19   0
  -4   1  14    1.55    6.80   0
  -4   2 -13    2.09    6.61   0
  -4   2  14   23.50    6.54   0
  -4   3 -13   -2.99    6.54   0
  -4   7  13    9.35    6.84   0
  -4  10  12  385.01    8.80   0
  -4  12  11   -1.41    6.88   0
  -4  15   9    0.74    5.97   0
  -4  16   8   10.39    6.79   0
  -4  17  -6   41.17    9.56   0
  -4  18   5   90.65    7.09   0
  -4  19  -2  -11.78    7.41   0
  -4  19  -1    1.62    6.65   0
  -4  19   2    3.66    6.71   0
  -3 -17  -2  238.62    6.72   0
  -3 -17  -1  100.48    7.66   0
  -3 -16  -4  235.61    8.26   0
  -3 -12  -8  286.36    8.71   0
  -3  -5 -11   10.73    7.29   0
  -3   4  12  133.75    7.74   0
  -3   8  11   29.64    6.54   0
  -3  10  10   36.48    6.83   0
  -3  13   8  108.60    7.10   0
  -3  14   7  116.45    7.57   0
  -3  15  -5    9.32    8.60   0
  -3  15   6   10.46    6.49   0
  -3  16   4  219.20    7.96   0
  -2 -14  -2    5.97    4.72   0
  -2 -14  -1    4.64    6.86   0
  -2 -13  -4   56.53    5.09   0
  -2 -12  -5   -2.07    6.33   0
  -2 -11  -6   11.31    4.80   0
  -2  -4  -9    3.82    6.82   0
  -2  -4  10    1.63    6.24   0
  -2   3  10  179.31    7.76   0
  -2   4  -9    2.80    6.73   0
  -2   7  -8   40.87    9.08   0
  -2   7   9   16.12    6.53   0
  -2   9   8   68.61    6.71   0
  -2  13  -3  346.95   10.50   0
  -2  13   4   58.80    6.72   0
  -2  14   0   -4.28    6.84   0
  -2  14   1    3.48    6.25   0
  -1 -10  -1  193.25    9.20   0
  -1  -9  -3   56.32    8.62   0
  -1  -8  -4    8.32    8.33   0
  -1  -7  -5  235.47    7.68   0
  -1  -4   7  117.49    9.50   0
  -1   4  -6   86.50    9.96   0
  -1   4   7  124.75    8.16   0
  -1   6   6   38.72    8.36   0
  -1  10   0  584.38   12.60   0
  -1  10   1  187.72    9.45   0
  -9 -15 -15    5.72    8.90   0
  -9  -9 -17  -11.75   10.98   0
  -9  -4 -18   12.96    9.73   0
  -9  -3 -18    7.78   10.53   0
  -9   3 -18    0.50   10.70   0
  -9   4 -18   -7.44    9.83   0
  -8 -24  -6    0.02    6.77   0
  -8 -21 -10   -8.49    7.60   0
  -8 -17 -13    0.09    7.13   0
  -8 -15 -14    4.62    8.66   0
  -8 -13 -15   -5.44    7.68   0
  -8 -11  17   -2.76   11.91   0
  -8 -10 -16    9.24    9.15   0
  -8  -7  18    0.40   10.91   0
  -8  -6 -17    2.63    7.73   0
  -8  -5 -17   -5.68    9.82   0
  -8   5 -17   -6.71   10.31   0
  -8   7  18    5.67   10.82   0
  -8  10 -16    0.85    9.30   0
  -8  11  17    9.31   11.13   0
  -8  15 -14    2.33   12.64   0
  -8  19  13    8.99    9.58   0
  -8  20  12   -1.74    7.52   0
  -8  21 -10   22.49   14.44   0
  -8  21  11   23.62    7.60   0
  -8  22  10   -2.17    7.57   0
  -8  23   9   13.34    8.67   0
  -8  24   7   25.51    8.06   0
  -8  25  -4   17.60   10.22   0
  -8  25   5    3.99    9.52   0
  -7 -24  -2   10.10    9.58   0
  -7 -23  -5   -0.90    7.60   0
  -7 -22  -7   -3.07    6.42   0
  -7 -21  -8    8.72    8.27   0
  -7 -19 -10   -1.32    8.33   0
  -7 -18 -11   -8.08    7.91   0
  -7 -15 -13   12.34    6.17   0
  -7 -13 -14   -5.33    6.39   0
  -7 -11  16   17.52    9.99   0
  -7 -10 -15    1.24    8.07   0
  -7  -6 -16   95.65    8.73   0
  -7   7  17    2.70    6.95   0
  -7  10 -15   -2.45    9.84   0
  -7  11  16   12.34    9.37   0
  -7  17  13   14.01    8.87   0
  -7  22   8   13.81    6.52   0
  -7  24  -3   32.64    8.72   0
  -7  24   4   15.07    6.85   0
  -6 -23   0  -10.70    7.38   0
  -6 -22  -4   16.86    7.64   0
  -6 -22   5    0.68    7.82   0
  -6 -21  -6   12.36    7.30   0
  -6 -21   7    6.85    7.69   0
  -6 -16 -11    0.57    5.66   0
  -6 -14 -12   -3.93    7.65   0
  -6 -13  14   78.50   11.31   0
  -6 -12 -13    7.40    7.86   0
  -6 -10 -14   -3.00    5.65   0
  -6  -7  16   21.89    7.79   0
  -6  -6 -15    5.85    6.07   0
  -6  -5 -15  186.04    9.27   0
  -6   7  16   11.02    8.33   0
  -6  13  14   61.84    8.73   0
  -6  15  13   14.61    7.64   0
  -6  19  10   98.07    8.31   0
  -6  23  -1  109.40    8.78   0
  -6  23   0   13.01    8.14   0
  -6  23   1  117.06    6.73   0
  -6  23   2   28.89    7.71   0
  -6  23   3  116.69    8.16   0
  -5 -21  -2   10.83    7.43   0
  -5 -21  -1  128.86    8.94   0
  -5 -19  -6    0.58    7.24   0
  -5 -15 -10   52.77    6.96   0
  -5  -6  15  114.80    8.24   0
  -5  -5 -14   -7.39    5.92   0
  -5  -4 -14    2.52    6.90   0
  -5   4 -14    9.73    6.78   0
  -5   6  15  105.46    7.87   0
  -5  10  14   32.52    6.78   0
  -5  14  12    1.60    7.24   0
  -5  20  -5   70.16    9.18   0
  -5  20   6   35.02    8.44   0
  -5  21   3  164.03    6.86   0
  -5  21   4   -7.17    7.55   0
  -4 -19  -2    4.15    6.38   0
  -4 -17  -6   48.45    5.39   0
  -4 -17   7    9.06    7.66   0
  -4 -16  -7   12.37    6.28   0
  -4 -15  -8    4.26    4.97   0
  -4 -12 -10    8.02    6.63   0
  -4 -10 -11   39.35    6.74   0
  -4  -8  13   23.79    6.19   0
  -4  -7 -12   13.58    6.88   0
  -4  -4  14  209.15    9.14   0
  -4  -3  14   15.01    6.38   0
  -4  -1 -13    8.11    5.23   0
  -4   0 -13   14.53    4.71   0
  -4   1 -13    8.27    5.45   0
  -4   3  14    2.20    4.79   0
  -4   4  14  203.57    7.38   0
  -4   7 -12    8.82    7.62   0
  -4  10 -11   32.95    8.53   0
  -4  12 -10   31.25   12.22   0
  -4  14  10   98.42    5.11   0
  -4  17   7    1.61    5.18   0
  -4  18   6  317.40    7.83   0
  -4  19   3   -2.62    5.06   0
  -4  19   4   21.70    6.21   0
  -3 -17   0  238.13    8.38   0
  -3 -17   1   94.52    7.07   0
  -3 -16  -3   17.35    7.10   0
  -3 -15  -5    7.76    6.56   0
  -3 -15   6    3.00    8.43   0
  -3 -14  -6   -1.49    6.86   0
  -3 -13  -7   43.62    6.93   0
  -3 -10  -9   19.62    6.33   0
  -3  -8 -10  344.30    7.16   0
  -3  -5  12   -0.12    6.90   0
  -3  -4 -11    8.85    5.19   0
  -3  -3 -11   17.68    7.22   0
  -3   4 -11   21.07    6.80   0
  -3   5  12    9.60    7.07   0
  -3  10  -9   22.24   10.23   0
  -3  12   9  243.00    6.81   0
  -3  16   5   24.97    7.06   0
  -3  17  -1  105.31    7.68   0
  -3  17   0  239.47    8.75   0
  -3  17   1  109.83    5.90   0
  -3  17   2  258.67    8.45   0
  -2 -14   0   -1.26    6.82   0
  -2 -14   1    2.99    6.37   0
  -2 -13  -3  361.58    9.12   0
  -2  -9  -7  530.05    8.36   0
  -2  -7  -8   45.24    5.19   0
  -2  -3  -9  146.14    7.84   0
  -2   3  -9  150.77    8.44   0
  -2   4  10   -3.67    4.89   0
  -2   5  10  345.01    8.54   0
  -2  11   7  174.74    7.83   0
  -2  12   6  120.20    6.97   0
  -2  14  -1    5.09    6.81   0
  -2  14   2   -1.54    6.61   0
  -1 -10   0  604.64   12.64   0
  -1  -6  -5   39.85    8.59   0
  -1  -4  -6   83.38    6.93   0
  -1   8   5  253.47    9.28   0
  -1   9   4   62.88    8.20   0
  -1  10  -1  184.53    9.96   0
  -1  10   2  592.88   11.27   0
  -9 -24  -7    6.64   11.03   0
  -9 -18 -13    2.73    7.56   0
  -9 -16 -14    8.41   10.70   0
  -9 -14 -15   18.82   10.57   0
  -9 -12 -16    2.70    7.88   0
  -9  -8 -17    8.61   10.95   0
  -9  -2 -18   -1.75    8.09   0
  -9  -1 -18  -11.34   10.13   0
  -9   0 -18    0.12    9.84   0
  -9   1 -18    2.80    9.81   0
  -9   2 -18    4.29    9.54   0
  -9   9 -17    2.34    9.88   0
  -8 -25  -3    7.96    7.18   0
  -8 -25  -2   28.66    9.92   0
  -8 -23  -7   19.96    7.55   0
  -8 -22  -8    1.30   10.06   0
  -8 -19 -11   10.25    9.47   0
  -8 -16 -13   19.64    9.34   0
  -8 -12 -15    8.30    8.86   0
  -8  -9 -16   20.13    8.61   0
  -8  -8  18   15.55   12.22   0
  -8  -4 -17   21.99    9.98   0
  -8  -3 -17   10.47    9.76   0
  -8   4 -17   58.36   10.48   0
  -8   8  18   13.92    8.33   0
  -8  12  17   12.53   11.34   0
  -8  14  16    4.63    7.80   0
  -8  16  15    7.25    7.97   0
  -8  18  14   12.09   10.86   0
  -8  22  -9   11.28   11.89   0
  -8  24   8   11.39   11.20   0
  -8  25   6   49.83   11.05   0
  -8  26  -1    5.87    9.91   0
  -8  26   0   16.53    9.81   0
  -8  26   1   13.34    7.30   0
  -8  26   2   12.77    9.62   0
  -8  26   3   16.72    8.92   0
  -7 -24  -1    6.99    8.22   0
  -7 -24   0   14.07    8.11   0
  -7 -24   2   20.12    9.01   0
  -7 -23   6   -1.07    8.05   0
  -7 -22  -6   35.61    8.97   0
  -7 -20  -9   27.11    6.28   0
  -7 -16 -12  172.46    8.93   0
  -7 -14 -13   -6.29    8.25   0
  -7  -9 -15   15.03    8.34   0
  -7  -8  17   13.31    9.23   0
  -7  -5 -16    5.28    6.58   0
  -7  -4 -16    8.51    8.35   0
  -7  -2  18  104.75    9.88   0
  -7  -1  18   14.37    9.89   0
  -7   0  18   -2.23   10.14   0
  -7   1  18   10.10   10.15   0
  -7   2  18  114.75   10.67   0
  -7   3  18   30.19    9.26   0
  -7   5 -16   25.00    8.95   0
  -7   8  17    1.56    7.29   0
  -7   9  17   25.46    8.93   0
  -7  12  16   50.84    9.83   0
  -7  14  15    2.51    7.39   0
  -7  16  14  111.67   10.64   0
  -7  19  12   -3.32    9.92   0
  -7  20  11   12.90    9.35   0
  -7  21  10   69.72    9.95   0
  -7  22   9    9.55    8.75   0
  -7  23   7   51.22    6.67   0
  -7  24   5    7.97    6.59   0
  -6 -22  -3   15.89    8.10   0
  -6 -21  -5    9.25    7.45   0
  -6 -20  -7    7.36    5.76   0
  -6 -19  -8  125.06    7.65   0
  -6 -18  -9    9.40    6.85   0
  -6 -17 -10   48.79    5.91   0
  -6  -9 -14  150.38    6.33   0
  -6  -4 -15   13.87    7.47   0
  -6  -2  17   -0.92    7.98   0
  -6  -1  17  109.29    8.96   0
  -6   0  17   -1.17    8.88   0
  -6   1  17   99.71    9.72   0
  -6   2  17   10.40    8.04   0
  -6   4 -15   14.48    8.49   0
  -6   5 -15  191.38    8.70   0
  -6   8  16   11.04    8.32   0
  -6  11  15   13.42    6.24   0
  -6  12 -13    8.36    9.83   0
  -6  17  12   34.88    7.92   0
  -6  18  11   -5.98    5.82   0
  -6  20   9   30.55    6.41   0
  -6  21   8   22.05    7.98   0
  -6  22   6   11.17    6.34   0
  -6  23  -2   12.85    7.87   0
  -6  23   4   32.54    8.46   0
  -5 -21   0    8.75    7.03   0
  -5 -21   1  141.25    8.95   0
  -5 -21   2   12.81    6.59   0
  -5 -20  -4   62.89    5.76   0
  -5 -19   7   17.70    9.10   0
  -5 -18  -7   27.70    5.46   0
  -5 -17  -8    9.48    4.93   0
  -5 -16  -9  138.92    6.15   0
  -5 -14  12    3.90   13.14   0
  -5 -13 -11   17.65    5.53   0
  -5 -11 -12   28.11    5.10   0
  -5 -10  14   27.76    7.81   0
  -5  -8 -13   95.18    5.53   0
  -5  -3 -14   -0.33    5.31   0
  -5  -2 -14    3.60    7.79   0
  -5  -1 -14   37.27    8.02   0
  -5   2 -14    6.42    7.68   0
  -5   3 -14    9.18    7.06   0
  -5   7  15  293.27    8.62   0
  -5  13  13   57.58    7.09   0
  -5  16  11   62.51    7.77   0
  -5  17  10   25.51    5.44   0
  -5  18   9   54.24    5.85   0
  -5  19   8    9.13    5.49   0
  -5  20   7   14.92    6.97   0
  -5  21  -3  177.84    9.17   0
  -5  21   5  130.59    7.49   0
  -4 -19  -1   12.81    4.61   0
  -4 -19   0   21.80    6.89   0
  -4 -19   1   13.29    6.76   0
  -4 -18   5   91.61    7.91   0
  -4 -17  -5  133.98    7.67   0
  -4 -16   8   14.19    8.65   0
  -4 -15   9    2.96   11.60   0
  -4 -13  -9   12.92    7.28   0
  -4  -9 -11    6.66    7.22   0
  -4  -6 -12  206.31    8.63   0
  -4   5  14    5.66    7.45   0
  -4   9  13   -3.91    7.46   0
  -4  11  12   10.54    4.63   0
  -4  13  11    7.82    4.49   0
  -4  16   9    7.94    5.99   0
  -4  17   8   15.89    6.12   0
  -4  18  -5   91.39    8.71   0
  -4  19  -3   -3.74    6.72   0
  -3 -16   4  232.05    9.05   0
  -3 -11  -8  302.53    8.48   0
  -3  -7 -10  348.14    7.27   0
  -3  -6  12  256.91   11.05   0
  -3  -2 -11   35.84    7.42   0
  -3  -1 -11   12.96    7.27   0
  -3   2 -11   36.55    7.37   0
  -3   3 -11   20.04    6.81   0
  -3   6  12  261.09    7.30   0
  -3   9  11   57.48    5.83   0
  -3  11  10  144.31    6.46   0
  -3  13   9   31.38    7.16   0
  -3  14   8   28.79    7.55   0
  -3  15   7   55.27    7.69   0
  -3  16  -4  215.52    8.96   0
  -3  17  -2  236.11    8.77   0
  -3  17   3   26.10    5.23   0
  -2 -13   4   60.17    6.90   0
  -2 -12  -4   38.55    6.99   0
  -2 -11  -5  224.42    8.31   0
  -2 -10  -6   28.63    5.04   0
  -2  -6  -8   -5.16    7.14   0
  -2  -5  10  334.34    9.94   0
  -2  -2  -9    4.54    5.26   0
  -2  -1  -9 1058.96   13.45   0
  -2   0  -9   10.59    7.53   0
  -2   1  -9 1065.97   14.26   0
  -2   2  -9    2.54    7.33   0
  -2   6  10   12.89    6.24   0
  -2   8   9    7.68    4.66   0
  -2  10   8    8.49    6.50   0
  -2  13   5  383.09    7.44   0
  -2  14  -2    1.03    6.58   0
  -2  14   3    5.48    4.75   0
  -1  -9  -2    4.82    8.05   0
  -1  -7  -4  193.68    9.28   0
  -1  -3  -6  133.54    7.58   0
  -1   0   8    0.29    7.11   0
  -1   1   8   23.89    7.35   0
  -1   3  -6  135.46   11.90   0
  -1   5   7    4.02    5.14   0
  -1   7   6  180.92    6.67   0
  -1   9  -3   55.91   11.41   0
  -1  10   3  113.63    7.83   0
  -9 -26  -2    1.07    9.69   0
  -9 -26  -1   11.52   10.89   0
  -9 -25  -5   81.61    8.36   0
  -9 -23  -8   10.59    9.36   0
  -9 -22  -9   13.86   10.19   0
  -9 -21 -10    0.10    9.80   0
  -9 -20 -11   19.67    9.70   0
  -9 -19 -12    5.81    8.05   0
  -9 -11 -16   34.51    9.00   0
  -9  -7 -17   76.64    9.99   0
  -9   8 -17   11.17   12.45   0
  -9  12 -16   -1.20   12.66   0
  -8 -25  -1    5.81    8.76   0
  -8 -25   0   72.38    9.80   0
  -8 -25   2   46.26    9.69   0
  -8 -24  -4    1.99    9.57   0
  -8 -23  -6   14.41    9.25   0
  -8 -21  -9   32.54    7.12   0
  -8 -20 -10   26.85    7.30   0
  -8 -14 -14   -3.18    6.97   0
  -8 -14  16   -2.10   13.53   0
  -8 -11 -15   18.10    8.49   0
  -8  -8 -16    0.21    7.82   0
  -8  -2 -17   -2.21    6.43   0
  -8  -1 -17   -3.00    8.01   0
  -8   0 -17   45.13    9.51   0
  -8   1 -17    3.23    8.96   0
  -8   2 -17   -7.02    8.22   0
  -8   3 -17    0.65    8.72   0
  -8   9 -16   -0.63    9.63   0
  -8  22  11   -5.78    8.60   0
  -8  23  -8    2.63   11.41   0
  -8  23  10   -2.34   11.24   0
  -8  25  -5    0.07    8.25   0
  -8  25   7    8.61   10.79   0
  -8  26  -2   13.06    9.47   0
  -8  26   4   48.03   10.99   0
  -7 -24   1    7.52    5.98   0
  -7 -23  -4    6.37    6.11   0
  -7 -21  -7   -0.10    7.96   0
  -7 -21   9    0.93    8.56   0
  -7 -18 -10   34.36    8.73   0
  -7 -17 -11   11.52    5.82   0
  -7 -11 -14   44.06    8.81   0
  -7  -8 -15    1.01    8.67   0
  -7  -3 -16   46.51    8.37   0
  -7  -3  18   44.03   10.26   0
  -7  -2 -16  229.69    9.87   0
  -7  -1 -16   55.76    9.25   0
  -7   3 -16   60.41    9.22   0
  -7   4 -16    6.03    7.96   0
  -7   4  18   12.83   10.08   0
  -7   5  18   10.44    9.19   0
  -7   9 -15    0.57   10.69   0
  -7  10  17    7.53    8.75   0
  -7  15  15    1.54    8.93   0
  -7  18  13   -0.33    7.25   0
  -7  23  -6    8.16    8.68   0
  -7  23   8    1.05    9.76   0
  -7  24  -4   41.50    8.47   0
  -7  24   6   45.05   10.01   0
  -7  25  -1    7.61    8.29   0
  -7  25   0   48.46    8.73   0
  -7  25   1    7.38    6.42   0
  -7  25   2   46.52    6.96   0
  -7  25   3    3.21    9.83   0
  -6 -22  -2   29.71    7.60   0
  -6 -22   4   56.78    7.74   0
  -6 -20  -6   14.58    7.34   0
  -6 -15 -11   82.76    5.98   0
  -6 -15  13   33.45   16.83   0
  -6 -13 -12   85.34    7.28   0
  -6 -11 -13   20.83    5.63   0
  -6 -11  15   29.51    9.70   0
  -6  -8 -14   32.34    7.00   0
  -6  -8  16   14.29    7.67   0
  -6  -3 -15   34.78    5.60   0
  -6  -3  17   48.19    9.15   0
  -6  -2 -15    2.35    7.49   0
  -6  -1 -15  123.33    8.14   0
  -6   2 -15    4.07    7.58   0
  -6   3 -15   40.83    8.01   0
  -6   3  17   38.48    6.77   0
  -6   4  17   25.99    8.66   0
  -6   9 -14  156.74    9.17   0
  -6   9  16   38.45    6.73   0
  -6  12  15   -3.35    6.13   0
  -6  14  14    2.57    6.05   0
  -6  16  13   20.34    8.37   0
  -6  22  -5    9.26    7.49   0
  -6  22   7   19.76    8.07   0
  -6  23  -3  112.66    8.77   0
  -6  23   5   84.22    8.65   0
  -5 -20  -3   57.43    6.68   0
  -5 -20   5   66.07    7.85   0
  -5 -19  -5   42.56    6.35   0
  -5 -14 -10    5.17    5.50   0
  -5 -12 -11   62.10    6.64   0
  -5 -10 -12   11.37    6.20   0
  -5  -7 -13  186.49    7.36   0
  -5  -7  15  291.40    9.41   0
  -5  -1  16    2.02    7.65   0
  -5   0 -14   -1.59    5.54   0
  -5   0  16    2.42    7.76   0
  -5   1 -14   43.48    7.16   0
  -5   1  16    5.71    7.61   0
  -5   2  16    4.52    7.34   0
  -5   3  16   14.97    7.14   0
  -5   8 -13   94.05    8.49   0
  -5   8  15  115.45    6.35   0
  -5  11 -12   19.44   10.17   0
  -5  11  14   23.48    5.59   0
  -5  15  12   16.77    5.64   0
  -5  22   0   -1.84    7.62   0
  -5  22   1   63.48    8.15   0
  -5  22   2   -1.54    7.20   0
  -4 -18  -3  145.50    6.31   0
  -4 -16  -6   48.05    7.43   0
  -4 -15  -7   32.47    7.51   0
  -4 -14  -8  433.58    7.96   0
  -4 -11 -10   -0.60    5.63   0
  -4 -11  12    4.13    8.31   0
  -4  -5 -12   18.14    6.95   0
  -4  -5  14   -1.60    7.24   0
  -4   6 -12  205.30    9.52   0
  -4   6  14   49.46    5.32   0
  -4  10  13   39.56    7.27   0
  -4  12  12   -1.47    6.89   0
  -4  14  11   76.74    6.88   0
  -4  15  10   15.17    5.34   0
  -4  18   7  105.27    8.17   0
  -4  19   5   17.33    4.70   0
  -4  20   0  296.02    8.59   0
  -4  20   1  109.11    6.99   0
  -4  20   2  106.74    7.18   0
  -3 -16  -2  257.88    7.10   0
  -3 -15  -4   10.11    5.15   0
  -3 -14  -5  171.06    7.93   0
  -3 -13  -6  256.23    8.17   0
  -3 -12  -7  120.03    7.46   0
  -3  -9  -9    6.18    4.93   0
  -3  -9  11   49.58   10.16   0
  -3  -6 -10  273.61    8.61   0
  -3  -1  13   51.21    7.13   0
  -3   0 -11   -3.68    4.96   0
  -3   0  13   -0.08    7.02   0
  -3   1 -11   17.60    5.28   0
  -3   1  13   40.77    7.54   0
  -3   2  13  115.33    8.21   0
  -3   7 -10  343.91   12.21   0
  -3   7  12  221.10    6.86   0
  -3  10  11   71.42    7.59   0
  -3  12  10   91.07    7.83   0
  -3  16   6  392.21    7.92   0
  -3  17   4   92.60    5.75   0
  -2 -13  -2  103.79    5.84   0
  -2  -8  -7    6.52    5.11   0
  -2  -5  -8  199.42    8.59   0
  -2   0  11   -1.81    6.85   0
  -2   1  11  777.57   11.56   0
  -2   2  11    9.66    6.53   0
  -2   7  10    8.61    6.43   0
  -2   9   9  627.21    9.80   0
  -2  12  -5    1.88    9.05   0
  -2  12   7    2.21    6.57   0
  -2  13  -4   63.93    8.27   0
  -2  13   6   14.61    6.60   0
  -2  14   4    4.61    4.77   0
  -1  -8  -3  363.94    9.34   0
  -1  -5  -5   58.71    6.36   0
  -1  -5   7   -1.11    8.87   0
  -1  -2  -6  162.30    7.44   0
  -1  -2   8  111.52    8.62   0
  -1  -1  -6   23.69    8.76   0
  -1  -1   8   13.30    5.90   0
  -1   2  -6  183.39   10.98   0
  -1   2   8  103.34    6.07   0
  -1   3   8  147.03    8.11   0
  -1   6  -5   40.46   17.57   0
  -1   6   7   21.28    5.26   0
  -1   8  -4    4.07   14.02   0
  -1   8   6  147.04    7.94   0
  -1   9   5    9.70    4.98   0
  -1  10  -2  602.97   14.99   0
  -1  10   4  334.61    9.29   0
  -1  11   1  927.31   13.26   0
   0   1   2    2.51   11.60   0
  -9 -26   0   -0.26    9.64   0
  -9 -26   1   30.40    9.74   0
  -9 -26   2    9.09    9.54   0
  -9 -25  -4   16.42    9.67   0
  -9 -24  -6    0.45    8.83   0
  -9 -17 -13   88.99    7.89   0
  -9 -15 -14   16.06    8.47   0
  -9 -13 -15    6.51    7.14   0
  -9 -10 -16   -7.71    8.27   0
  -9  -6 -17   14.86    8.52   0
  -8 -25   1   10.58    7.07   0
  -8 -24   6   -0.17    8.21   0
  -8 -23   8    0.48    9.20   0
  -8 -22  -7   -0.02    8.27   0
  -8 -18 -11  130.99    9.02   0
  -8 -17 -12    5.90    6.35   0
  -8 -15 -13   10.56    7.85   0
  -8 -13 -14    8.31    7.87   0
  -8  -7 -16    7.73    7.70   0
  -8  12 -15   19.64   11.38   0
  -8  20 -11   57.49   21.49   0
  -8  24  -7   86.93   11.39   0
  -8  26  -3   20.32   10.12   0
  -8  26   5   35.85    8.37   0
  -7 -23  -3    2.11    5.77   0
  -7 -23   5    0.05    7.54   0
  -7 -22  -5    4.18    7.28   0
  -7 -20  -8   44.74    6.44   0
  -7 -19  -9   36.73    6.29   0
  -7 -15 -12   45.47    6.53   0
  -7 -13 -13    4.13    6.27   0
  -7  -9  17   13.83   10.21   0
  -7  -7 -15    8.48    7.80   0
  -7  -5  18   -5.83   11.12   0
  -7  -4  18   17.74   10.30   0
  -7   0 -16   -4.63    8.33   0
  -7   1 -16   44.71    8.15   0
  -7   2 -16  186.29    7.92   0
  -7   6  18   83.61   10.76   0
  -7  11  17    1.26    8.28   0
  -7  12 -14   73.01   12.46   0
  -7  13  16   -2.34    7.53   0
  -7  17  14   61.03    6.95   0
  -7  20  12   89.63   10.21   0
  -7  21  11    3.42    9.40   0
  -7  22  10   55.90    9.72   0
  -7  24   7    1.87    9.90   0
  -7  25  -2   61.83    8.99   0
  -7  25   4   95.18    7.74   0
  -6 -22  -1   15.59    6.93   0
  -6 -22   0    3.22    7.64   0
  -6 -21  -4   72.52    6.93   0
  -6 -20   8   21.17    7.90   0
  -6 -19  -7  157.98    7.67   0
  -6 -18  -8    6.25    8.09   0
  -6 -17  -9   14.43    7.07   0
  -6 -16 -10   19.60    5.52   0
  -6 -14 -11   26.40    8.38   0
  -6 -10 -13   19.59    7.84   0
  -6  -7 -14   31.42    7.20   0
  -6  -4  17    7.53    8.60   0
  -6   0 -15    6.62    5.86   0
  -6   1 -15  112.20    6.39   0
  -6   5  17  139.15    6.73   0
  -6   6  17   45.69    9.21   0
  -6  10  16    8.76    6.60   0
  -6  13  15  189.14    9.69   0
  -6  14 -12    2.28   12.33   0
  -6  15  14  132.06    9.62   0
  -6  18  12   18.28    9.04   0
  -6  19  11  148.72    6.74   0
  -6  20  -8   27.39   10.54   0
  -6  20  10   10.12    6.11   0
  -6  21   9    7.55    5.91   0
  -6  22   8   21.22    7.86   0
  -6  23   6   21.67    8.57   0
  -6  24   0    1.54    7.80   0
  -6  24   1   37.14    9.16   0
  -6  24   2   -1.36    8.73   0
  -5 -20  -2   36.59    7.16   0
  -5 -20   4   66.75    8.69   0
  -5 -19  -4    3.23    6.57   0
  -5 -18  -6  131.47    5.66   0
  -5 -17  -7  220.76    7.15   0
  -5 -16  -8   22.52    5.94   0
  -5 -15  -9   64.84    4.84   0
  -5  -9 -12  125.09    7.39   0
  -5  -6 -13   90.05    6.75   0
  -5  -3  16    6.25    8.09   0
  -5  -2  16   11.27    8.00   0
  -5   4  16    3.14    7.66   0
  -5   5  16    3.89    7.20   0
  -5   9  15    7.52    5.60   0
  -5  12  14   44.87    7.74   0
  -5  14  13   15.34    7.41   0
  -5  16  12   -5.39    6.81   0
  -5  17  11  147.44    6.78   0
  -5  18  10   22.42    5.48   0
  -5  19   9   -3.16    5.83   0
  -5  20   8   63.74    8.34   0
  -5  21  -4    6.68    8.02   0
  -5  21   6    4.54    5.46   0
  -5  22  -1   55.89    8.13   0
  -5  22   3   26.87    5.79   0
  -5  22   4   10.84    7.87   0
  -4 -18  -2  334.10    8.89   0
  -4 -18   4  377.56   10.58   0
  -4 -17  -4   18.03    7.72   0
  -4 -12  -9    0.67    7.14   0
  -4 -10 -10   88.45    7.28   0
  -4  -9  13    4.42    7.75   0
  -4  -8 -11   13.51    5.95   0
  -4  -6  14   42.00    6.52   0
  -4  -4 -12  154.32    8.21   0
  -4   5 -12   21.71    9.11   0
  -4   7  14   15.95    5.29   0
  -4   8  14  106.33    7.42   0
  -4  13  12   -6.32    6.78   0
  -4  17   9    4.46    6.71   0
  -4  19  -4   24.00    7.88   0
  -4  19   6    8.67    4.96   0
  -4  20  -1  116.17    7.41   0
  -4  20   3   55.96    5.31   0
  -4  20   4   28.51    7.33   0
  -3 -16  -1    4.62    4.98   0
  -3 -16   0  470.47   10.15   0
  -3 -16   3   10.56    6.84   0
  -3 -15  -3   -1.21    7.13   0
  -3 -14   7  124.47   10.80   0
  -3 -10  -8  305.86    8.24   0
  -3  -8  -9   34.00    6.86   0
  -3  -5 -10   14.91    6.72   0
  -3  -2  13  105.20    8.22   0
  -3   3  13   75.16    5.81   0
  -3   4  13   38.66    7.09   0
  -3   8  12  163.79    6.13   0
  -3  11  11  123.08    7.29   0
  -3  14   9   17.76    6.69   0
  -3  15   8   40.29    7.21   0
  -3  16   7   28.82    7.05   0
  -3  17  -3   27.02    7.27   0
  -3  17   5    5.92    5.52   0
  -3  18   0  202.60    8.98   0
  -3  18   1   18.78    7.96   0
  -3  18   2   99.88    8.29   0
  -2 -13  -1  798.74   11.69   0
  -2 -13   3  354.40   10.36   0
  -2 -12  -3    2.65    6.60   0
  -2 -10  -5   18.78    7.29   0
  -2  -9  -6   21.41    5.31   0
  -2  -8   9    4.67    7.44   0
  -2  -7  -7  142.22    7.69   0
  -2  -6  10    5.47    7.21   0
  -2  -2  11   -1.32    6.82   0
  -2  -1  11  793.95   11.94   0
  -2   3  11   18.05    7.35   0
  -2   4  11    6.32    7.16   0
  -2   6  -8    1.58    8.65   0
  -2  10   9   -6.73    6.31   0
  -2  11   8   27.40    5.11   0
  -2  14   5    4.62    6.45   0
  -2  15   0   19.18    6.95   0
  -2  15   1  365.77    7.86   0
  -2  15   2    2.05    6.80   0
  -2  15   3  493.65    9.31   0
  -1  -9  -1   76.64    7.27   0
  -1  -9   3   56.48    9.42   0
  -1  -6  -4  166.66   10.49   0
  -1  -4  -5  217.91   10.73   0
  -1   0  -6    0.70    8.47   0
  -1   1  -6   26.03    8.60   0
  -1   4   8   47.65    7.07   0
  -1   7   7   93.95    7.68   0
  -1  11   0  717.67   12.75   0
  -1  11   2  647.17   10.11   0
  -1  11   3  738.64   11.19   0
   0   2   2  815.70   17.82   0
   0   3   1   16.80   12.26   0
  -9 -25  -3   58.86    8.94   0
  -9 -24  -5   29.27    9.35   0
  -9 -23  -7    3.69    6.94   0
  -9 -22  -8   13.74    9.59   0
  -9 -19 -11    7.69    9.93   0
  -9 -18 -12   12.10    6.81   0
  -9 -16 -13  109.35   10.50   0
  -9 -12 -15   -8.31   10.01   0
  -9  -9 -16   11.09    9.92   0
  -9  -5 -17   -8.04    7.70   0
  -9  -4 -17    1.50   10.14   0
  -9   7 -17   70.66    9.63   0
  -8 -24  -3   29.10    6.51   0
  -8 -24   5   57.02   10.96   0
  -8 -23  -5   12.98    7.62   0
  -8 -21  -8    8.98    6.45   0
  -8 -20  -9  119.04    8.19   0
  -8 -19 -10    1.44    6.19   0
  -8 -16 -12    2.51    8.95   0
  -8 -12  17    2.09   12.18   0
  -8 -10 -15  106.09    7.19   0
  -8  -6 -16   50.76    8.26   0
  -8   8 -16   17.25    8.81   0
  -8  27   0   11.13    9.93   0
  -8  27   1   20.91   11.55   0
  -7 -23  -2   -1.23    6.25   0
  -7 -23  -1   12.07    8.58   0
  -7 -23   4    6.67    8.25   0
  -7 -22  -4   64.36    8.66   0
  -7 -22   7   -2.61    8.22   0
  -7 -21  -6    9.57    7.56   0
  -7 -20  10   42.38   11.24   0
  -7 -17 -10   96.31    7.77   0
  -7 -16 -11    6.25    6.03   0
  -7 -14 -12    1.06    7.77   0
  -7 -14  15    9.92   12.14   0
  -7 -12 -13  -15.84    8.02   0
  -7 -12  16   51.70   10.86   0
  -7 -10 -14    5.77    5.74   0
  -7  -6 -15   25.20    7.88   0
  -7   7  18   69.41    7.32   0
  -7   8  18   86.58    9.49   0
  -7  14  16   13.17    7.13   0
  -7  16  15   16.36    6.68   0
  -7  18  14   72.51    8.98   0
  -7  19  13    2.09    6.54   0
  -7  23   9    9.63    7.43   0
  -7  24  -5    7.27    8.29   0
  -7  24   8   19.48    8.39   0
  -7  25  -3    5.53    8.16   0
  -7  25   5    5.67    7.05   0
  -7  25   6   50.08    9.20   0
  -6 -22   1   13.98    5.52   0
  -6 -22   2   27.28    5.74   0
  -6 -21  -3    8.58    7.68   0
  -6 -21   6   24.11    6.75   0
  -6 -20  -5   21.54    7.74   0
  -6 -15 -10   74.78    8.61   0
  -6 -12 -12   33.28    6.48   0
  -6  -9 -13   78.24    8.43   0
  -6  -9  16   48.67    9.48   0
  -6  -6 -14   -4.88    7.55   0
  -6  -5  17  134.62    9.60   0
  -6   7  17    0.08    6.44   0
  -6   8 -14   23.46    8.84   0
  -6  11  16    5.60    8.83   0
  -6  14  15   11.10    7.62   0
  -6  17  13   27.48    6.76   0
  -6  19  -9  180.54   14.47   0
  -6  21  -7    5.17    8.80   0
  -6  23  -4   29.58    8.67   0
  -6  23   7   94.01    8.64   0
  -6  24  -1   32.85    9.36   0
  -6  24   3   12.22    6.53   0
  -6  24   4  -10.40    8.45   0
  -5 -20  -1   47.33    7.37   0
  -5 -18   8   74.22    9.47   0
  -5 -13 -10   23.61    4.70   0
  -5 -11 -11   88.31    5.29   0
  -5  -8  15  103.75    8.02   0
  -5  -5 -13   70.43    6.84   0
  -5  -4  16    3.63    7.91   0
  -5   6  16   26.24    7.82   0
  -5   7 -13  187.05    8.99   0
  -5  10  15   13.27    5.58   0
  -5  13  14   41.19    7.45   0
  -5  15  13   83.78    7.62   0
  -5  18  -8   70.68   11.93   0
  -5  19  -7   13.21    9.87   0
  -5  21   7  130.51    8.54   0
  -5  22  -2    3.82    6.66   0
  -5  22   5   60.89    7.95   0
  -4 -18  -1   53.82    7.48   0
  -4 -16  -5   16.15    7.86   0
  -4 -15  -6   11.97    6.71   0
  -4 -14  -7   90.40    7.34   0
  -4 -13  -8   -8.31    6.54   0
  -4  -7 -11   -3.51    6.40   0
  -4  -3 -12   -3.24    4.87   0
  -4  -2 -12   21.34    7.20   0
  -4  -1  15    9.55    7.81   0
  -4   0  15   67.74    8.11   0
  -4   1  15   27.69    7.70   0
  -4   2  15   10.19    7.65   0
  -4   3  15   -5.41    7.96   0
  -4   4 -12  147.83   10.27   0
  -4   4  15  192.05    8.30   0
  -4   9 -11    2.06    8.96   0
  -4   9  14    6.31    7.45   0
  -4  11  13   31.54    5.83   0
  -4  15  11   -3.48    7.70   0
  -4  16  10   22.92    5.34   0
  -4  18   8  279.95    7.01   0
  -4  19   7   13.65    7.69   0
  -4  20  -2  100.29    7.27   0
  -4  20   5   62.23    7.65   0
  -3 -16   1    9.83    6.47   0
  -3 -14  -4   45.46    6.89   0
  -3 -13   8  118.35   15.06   0
  -3 -11  -7  155.56    7.52   0
  -3  -7  12  223.15   10.72   0
  -3  -4 -10   80.33    7.20   0
  -3  -3  13   80.88    8.09   0
  -3   5  13   30.22    5.43   0
  -3   6  13   80.26    7.33   0
  -3   9  12   38.00    5.34   0
  -3  13  10   10.00    5.00   0
  -3  17   6   78.65    7.25   0
  -3  18  -1   23.23    7.76   0
  -3  18   3    0.89    5.05   0
  -3  18   4    5.86    7.02   0
  -2 -13   0   18.04    6.97   0
  -2 -12   5    1.54    8.38   0
  -2 -11  -4   38.65    5.40   0
  -2  -4  -8    7.34    4.92   0
  -2  -3  11   24.70    7.36   0
  -2   5  11  573.91   10.12   0
  -2   8  10   28.20    5.01   0
  -2  12   8   65.11    7.03   0
  -2  13   7  155.56    7.78   0
  -2  14  -3    9.95    6.48   0
  -2  14   6   17.63    6.39   0
  -2  15  -1  367.17    9.73   0
  -2  15   4   31.66    7.11   0
  -1  -9   0    0.97    7.70   0
  -1  -9   2    0.66    9.93   0
  -1  -8  -2   11.58    9.23   0
  -1  -7  -3  674.02   13.33   0
  -1  -3   8  143.79    8.99   0
  -1   5   8   16.76    5.06   0
  -1   8   7  101.12    7.56   0
  -1   9   6   52.09    5.38   0
  -1  10   5   75.52    5.65   0
  -1  11  -1  904.17   14.41   0
  -1  11   4  220.65    8.05   0
   0  -1   2    3.60   11.39   0
   0   0   3   -0.75   11.58   0
   0   1   3   15.05   11.86   0
   0   2   3    2.10   11.50   0
   0   3   2    2.14    8.38   0
 -10 -13 -15    8.57   11.41   0
  -9 -25  -2   -3.41    8.61   0
  -9 -25   5   90.69   10.94   0
  -9 -21  -9   90.57    7.95   0
  -9 -20 -10   -1.74    7.31   0
  -9 -17 -12    2.71    9.57   0
  -9 -14 -14    5.70    7.35   0
  -9 -11 -15   53.71   10.36   0
  -9  -8 -16    2.90   10.12   0
  -9  -3 -17   23.70    9.33   0
  -9  -2 -17   41.05    9.80   0
  -9   5 -17   18.84   11.12   0
  -9   6 -17   15.72    8.82   0
  -9  11 -16   22.64   11.50   0
  -9  14 -15    2.16   14.36   0
  -8 -24  -2    9.31    6.21   0
  -8 -24  -1   56.47    8.42   0
  -8 -23  -4    0.47    8.59   0
  -8 -22  -6   -2.93    7.93   0
  -8 -22   9    8.93   11.08   0
  -8 -17 -11   16.86    8.19   0
  -8 -14 -13  130.03    7.53   0
  -8 -12 -14   49.46    6.85   0
  -8  -9 -15   18.17    6.94   0
  -8  -5 -16   10.95    6.36   0
  -8  -4 -16   71.43    9.47   0
  -8   7 -16   10.49    8.92   0
  -8  25  -6   46.71   11.77   0
  -8  26  -4   32.35   11.17   0
  -7 -23   0    7.91    8.58   0
  -7 -23   1   -1.11    8.55   0
  -7 -23   2    5.98    8.36   0
  -7 -20  -7    9.83    5.74   0
  -7 -19  -8    4.35    6.67   0
  -7 -19  11   31.31   12.92   0
  -7 -18  -9   42.02    5.60   0
  -7 -18  12   29.41   15.29   0
  -7  -9 -14    8.45    7.45   0
  -7  -6  18   47.85   10.70   0
  -7  -5 -15    5.12    7.19   0
  -7   8 -15    4.56    8.13   0
  -7   9  18    6.96   10.99   0
  -7  12  17    2.45    6.97   0
  -7  15  16   90.13   11.58   0
  -7  17  15   19.68   10.07   0
  -7  20  13   -0.37    9.54   0
  -7  21  12   43.57   10.25   0
  -7  22  -8   30.23   11.70   0
  -7  22  11   -4.23    9.92   0
  -7  26   0  186.37    9.77   0
  -7  26   1   -9.21   10.45   0
  -7  26   2  160.67   10.96   0
  -7  26   3    3.06   10.15   0
  -6 -21  -2   31.80    7.91   0
  -6 -19  -6  289.73    9.27   0
  -6 -19   9  175.44   11.44   0
  -6 -18  -7    0.07    7.97   0
  -6 -17  -8   29.50    8.06   0
  -6 -16  -9   13.13    7.92   0
  -6 -13 -11  186.06    8.68   0
  -6 -11 -12    9.70    7.71   0
  -6  -6  17   12.04    7.95   0
  -6  -5 -14  342.82    9.39   0
  -6   8  17   -0.96    6.12   0
  -6   9  17  140.39    8.79   0
  -6  12  16   16.32    8.92   0
  -6  16  14   10.04    6.32   0
  -6  18  13    6.85    8.08   0
  -6  19  12  102.73    6.90   0
  -6  20  11    5.10    6.25   0
  -6  21  10   29.85    6.48   0
  -6  22  -6   19.06    9.87   0
  -6  22   9    1.48    8.74   0
  -6  24  -2  -12.58    8.57   0
  -6  24   5   12.70    8.81   0
  -5 -20   0   60.75    6.25   0
  -5 -20   1   46.52    7.69   0
  -5 -20   2   40.96    7.14   0
  -5 -19  -3   38.47    6.39   0
  -5 -19   6    5.15    7.29   0
  -5 -18  -5   44.27    5.02   0
  -5 -17  -6    4.58    6.54   0
  -5 -16  -7   95.39    7.24   0
  -5 -15  -8    3.71    6.72   0
  -5 -14  -9    3.79    5.03   0
  -5 -12 -10    9.42    6.64   0
  -5 -10 -11    8.70    6.62   0
  -5  -8 -12   -3.34    4.99   0
  -5  -5  16   -3.70    6.90   0
  -5  -4 -13   13.25    5.02   0
  -5  -3 -13  136.82    7.64   0
  -5   6 -13   95.44    8.43   0
  -5   7  16    9.58    5.60   0
  -5   8  16   21.02    7.94   0
  -5  11  15  107.62    8.84   0
  -5  13 -11   18.17   11.03   0
  -5  17  12   13.23    8.37   0
  -5  18  11   27.80    6.12   0
  -5  19  10   24.03    6.06   0
  -5  20  -6   46.70    8.58   0
  -5  20   9   13.68    5.89   0
  -5  21   8   29.77    7.36   0
  -5  22  -3   37.58    6.69   0
  -5  22   6   -2.42    7.51   0
  -5  23   1    9.65    6.83   0
  -5  23   2    6.59    7.11   0
  -4 -18   0  384.42    9.38   0
  -4 -18   1   50.02    7.50   0
  -4 -17  -3   12.37    5.41   0
  -4 -17   6   39.16    6.59   0
  -4 -11  -9   11.94    5.42   0
  -4  -9 -10    2.68    5.28   0
  -4  -7  14   20.33    7.97   0
  -4  -6 -11  257.70    8.33   0
  -4  -3  15    5.30    7.25   0
  -4  -2  15    5.85    7.66   0
  -4  -1 -12    1.56    6.26   0
  -4   0 -12  333.53    9.10   0
  -4   1 -12   -2.10    7.16   0
  -4   2 -12   18.25    7.21   0
  -4   3 -12    2.24    7.15   0
  -4   5  15   10.28    8.40   0
  -4   6  15   93.01    8.61   0
  -4  10  14  305.89    8.71   0
  -4  12  13    5.81    5.86   0
  -4  14  12  286.00    9.49   0
  -4  17  10   17.62    7.57   0
  -4  18   9   81.66    8.33   0
  -4  20   6   33.74    8.28   0
  -4  21   1   24.71    7.28   0
  -4  21   2   21.66    7.73   0
  -4  21   3   23.88    7.23   0
  -3 -15  -2  112.42    7.04   0
  -3 -15   5   14.40    6.19   0
  -3 -13  -5   57.67    5.29   0
  -3 -12  -6  607.42    8.50   0
  -3 -11  10  139.36   15.83   0
  -3  -9  -8    2.93    6.23   0
  -3  -7  -9    6.48    4.65   0
  -3  -4  13   37.03    7.19   0
  -3  -3 -10   88.50    7.45   0
  -3   6 -10  277.74   10.19   0
  -3   7  13   13.99    7.07   0
  -3  10  12    3.74    6.60   0
  -3  12  11   57.03    5.22   0
  -3  14  10    3.30    6.31   0
  -3  15   9   -5.37    6.85   0
  -3  16   8  253.53    7.84   0
  -3  17   7   40.84    6.31   0
  -3  18  -2   84.21    8.20   0
  -3  18   5   -0.94    6.96   0
  -2 -12  -2  130.23    6.54   0
  -2  -8  -6   28.15    4.96   0
  -2  -6  -7    4.33    6.39   0
  -2  -3  -8  106.38    5.76   0
  -2   6  11   24.15    5.38   0
  -2   9  10   29.07    4.90   0
  -2  11   9  260.52    8.25   0
  -2  15   5  377.58    8.99   0
  -1  -7   6  185.63   21.11   0
  -1  -3  -5   81.65    9.78   0
  -1   1   9  216.90    8.69   0
  -1   2   9  234.94    8.80   0
  -1   6   8   33.94    5.56   0
  -1  10   6   74.38    7.36   0
  -1  12   1  967.21   12.92   0
  -1  12   2  331.89    9.33   0
   0   3   0   -1.54   11.72   0
   0   3   3   11.70    8.11   0
   0   4   1    0.83   11.71   0
   0   4   2  820.61   17.72   0
 -10 -18 -12   -6.54   10.41   0
 -10 -15 -14   73.84    8.64   0
 -10 -10 -16   11.03    8.33   0
 -10  -6 -17    9.03    9.79   0
  -9 -25  -1   71.41    8.63   0
  -9 -25   0   13.97    9.11   0
  -9 -24  -4    9.55    8.73   0
  -9 -23  -6   -3.43    6.96   0
  -9 -22  -7  -15.23    9.81   0
  -9 -18 -11    6.93    9.82   0
  -9 -15 -13   63.01    9.28   0
  -9 -13 -14   24.96    9.03   0
  -9  -7 -16   -2.38   10.37   0
  -9  -1 -17   20.45    9.29   0
  -9   0 -17    0.38   10.18   0
  -9   1 -17   13.24   10.01   0
  -9   2 -17   19.55   10.41   0
  -9   3 -17   35.19   10.34   0
  -9   4 -17   -7.39   10.51   0
  -8 -24   0   46.59    8.39   0
  -8 -24   1   44.06    8.71   0
  -8 -24   2   18.92    7.95   0
  -8 -24   3   23.93    8.62   0
  -8 -23   7   26.81    9.01   0
  -8 -21  -7   10.24    6.53   0
  -8 -20  -8   24.33    8.30   0
  -8 -19  -9    9.78    8.30   0
  -8 -18 -10   67.43    6.19   0
  -8 -15 -12   21.03    8.67   0
  -8 -13 -13   23.47    9.30   0
  -8 -11 -14    3.18    7.73   0
  -8  -8 -15   43.81    8.11   0
  -8  -3 -16  -11.09    8.68   0
  -8   6 -16   46.12    9.37   0
  -7 -22  -3   14.13    5.71   0
  -7 -21  -5    5.65    5.36   0
  -7 -16 -10  215.35    8.46   0
  -7 -15 -11    2.67    5.71   0
  -7 -13 -12   34.61    7.38   0
  -7 -11 -13   -2.64    7.03   0
  -7 -10  17    6.08   10.71   0
  -7  -8 -14  247.23    9.00   0
  -7  -7  18   56.00   10.69   0
  -7  -4 -15    4.56    7.19   0
  -7  -1  19    5.09    9.06   0
  -7   0  19   -9.33   10.48   0
  -7   1  19   -3.56   10.60   0
  -7   2  19   -3.32   10.66   0
  -7   3  19   -4.78   11.40   0
  -7   4  19    6.67    9.98   0
  -7   7 -15    8.74    8.12   0
  -7  10  18    4.07   10.90   0
  -7  13  17   -6.33    8.07   0
  -7  19  14   -4.91   10.75   0
  -7  21  -9    2.36   11.50   0
  -7  23  -7   44.22   10.18   0
  -7  24   9    3.75   10.44   0
  -7  25  -4   97.30    9.54   0
  -7  25   7   -6.82    7.44   0
  -7  26  -1   14.22    9.75   0
  -7  26   4   68.83    7.23   0
  -7  26   5    4.72    8.73   0
  -6 -21  -1   -2.71    8.26   0
  -6 -21   5    2.63    6.08   0
  -6 -20  -4   18.83    5.70   0
  -6 -14 -10    3.66    7.41   0
  -6  -8 -13   19.73    5.29   0
  -6  -4 -14    3.05    5.88   0
  -6  -3 -14  110.62    8.43   0
  -6  -1  18   17.69    7.85   0
  -6   0  18   15.71    8.36   0
  -6   1  18   17.93    8.56   0
  -6   2  18    2.52    9.34   0
  -6   3  18   71.34    9.28   0
  -6   4  18    4.80    8.31   0
  -6   7 -14   19.43    8.31   0
  -6  10  17   -3.21    8.70   0
  -6  11 -13   15.70    9.22   0
  -6  13  16   91.49   10.21   0
  -6  15  15   57.63    7.32   0
  -6  17  14   42.90   10.06   0
  -6  21  11    3.49    9.01   0
  -6  23   8   15.07    6.53   0
  -6  24  -3   20.17    9.44   0
  -6  24   6    0.92    6.31   0
  -6  25   1    4.83    8.20   0
  -6  25   2    6.33    7.95   0
  -5 -19  -2   18.24    6.66   0
  -5 -18  -4  360.08    8.70   0
  -5 -11  14   10.63    7.91   0
  -5  -7 -12   28.79    6.36   0
  -5  -2 -13  169.63    7.69   0
  -5   5 -13   77.22    8.50   0
  -5   9  16   17.80    7.87   0
  -5  12  15   94.90    8.39   0
  -5  14  14    5.58    5.98   0
  -5  16  13   84.20    8.17   0
  -5  21  -5  134.68    9.71   0
  -5  22   7   26.64    7.80   0
  -5  23  -1    2.01    7.14   0
  -5  23   0   56.67    8.17   0
  -5  23   3    0.84    5.60   0
  -5  23   4   52.44    8.01   0
  -4 -17  -2   15.15    7.01   0
  -4 -16  -4   47.19    6.80   0
  -4 -12  -8  179.86    7.25   0
  -4  -8 -10   75.21    7.10   0
  -4  -5 -11   14.32    7.10   0
  -4  -4  15  198.67   10.45   0
  -4   7  15    0.81    7.64   0
  -4  13  13   13.79    7.93   0
  -4  15  12   -8.32    6.76   0
  -4  16  11    5.26    5.71   0
  -4  19   8    1.82    6.08   0
  -4  20  -3   53.47    6.86   0
  -4  20   7   41.89    7.74   0
  -4  21  -1   14.42    6.53   0
  -4  21   0   17.72    5.45   0
  -4  21   4   13.61    7.91   0
  -3 -15  -1    8.42    6.78   0
  -3 -14  -3  103.75    7.41   0
  -3 -10  -7   40.20    6.65   0
  -3  -6  -9   28.30    6.57   0
  -3  -5  13   22.01    7.97   0
  -3  -2 -10  161.61    7.95   0
  -3   5 -10   11.99    7.74   0
  -3   8  13   61.10    7.05   0
  -3  11  12   81.51    7.15   0
  -3  13  11   13.58    6.38   0
  -3  15  -6    9.44    8.13   0
  -3  16  -5   25.35    6.90   0
  -3  17  -4  106.38    9.41   0
  -3  18   6    3.35    6.71   0
  -3  19   1  142.80    7.68   0
  -3  19   2   21.56    6.68   0
  -3  19   3  151.47    7.28   0
  -2 -12  -1   40.57    7.29   0
  -2 -11  -3  514.47    8.65   0
  -2 -10  -4    8.29    6.85   0
  -2  -9  -5  927.42   10.70   0
  -2  -4  11    0.66    6.75   0
  -2  -2  -8    3.87    5.52   0
  -2   5  -8  189.52    9.80   0
  -2   7  11    9.53    5.26   0
  -2   8  11   11.00    6.63   0
  -2  10  10   15.22    6.79   0
  -2  11  -6   15.26   12.76   0
  -2  12   9   -8.56    6.53   0
  -2  13   8   21.01    7.09   0
  -2  14   7   -7.76    6.56   0
  -2  15  -2   -0.75    6.77   0
  -2  15   6   34.23    6.48   0
  -2  16   0    1.16    6.56   0
  -2  16   1   10.14    7.13   0
  -2  16   2   79.78    5.88   0
  -2  16   3   26.49    7.14   0
  -1  -8  -1  412.09   11.98   0
  -1  -5  -4   13.53    7.69   0
  -1  -4   8   44.59    7.27   0
  -1  -1   9  218.27    9.24   0
  -1   0   9   -2.01    7.55   0
  -1   3   9  409.94    8.48   0
  -1   4   9   67.02    7.58   0
  -1   7   8   50.32    5.47   0
  -1   9   7   74.50    5.55   0
  -1  11   5  421.50    8.09   0
  -1  12   0  924.45   13.38   0
  -1  12   3  461.39    8.54   0
   0  -1   3   12.82   14.30   0
   0   1   4    1.06   10.79   0
   0   2   4  282.91   13.26   0
   0   4   3    1.36    7.82   0
   0   5   2    3.94   11.13   0
 -10 -24  -5   -9.25   11.17   0
 -10 -23  -7  -12.76    8.68   0
 -10 -22  -8    9.54    9.33   0
 -10 -21  -9   -3.28   10.61   0
 -10 -20 -10    3.37   10.69   0
 -10 -19 -11   10.21    8.35   0
 -10 -16 -13   22.45    9.15   0
 -10 -14 -14   28.44    9.77   0
 -10 -12 -15   16.24    7.94   0
 -10  -9 -16  114.39   10.33   0
 -10  -5 -17    8.97    9.90   0
  -9 -25   1   60.82    8.94   0
  -9 -25   2   -1.04    8.12   0
  -9 -25   3   53.00    8.85   0
  -9 -24  -3   20.38    9.89   0
  -9 -24   7   -0.10   10.38   0
  -9 -23  -5   -7.75    9.85   0
  -9 -21  -8   33.80    7.62   0
  -9 -20  -9   30.76    8.75   0
  -9 -19 -10   19.30    7.21   0
  -9 -16 -12   26.90    8.75   0
  -9 -10 -15   -1.65    7.26   0
  -9  -6 -16   -2.50   10.01   0
  -9  10 -16    3.71   10.56   0
  -8 -23  -3   14.16    7.03   0
  -8 -22  -5    6.42    6.06   0
  -8 -16 -11   -2.29    8.33   0
  -8 -10 -14    3.75    8.37   0
  -8  -7 -15    2.30    8.36   0
  -8  -2 -16    7.71    6.40   0
  -8  -1 -16   -5.76    8.69   0
  -8   0 -16   57.88    8.90   0
  -8   4 -16   68.00    9.64   0
  -8   5 -16    9.77    9.32   0
  -8  11 -15    3.14    8.69   0
  -8  14 -14   15.41   12.05   0
  -8  26  -5   10.70   12.22   0
  -7 -22  -2   38.51    7.13   0
  -7 -22   6   36.40    7.52   0
  -7 -21  -4   64.27    7.78   0
  -7 -21   8   29.76    8.78   0
  -7 -20  -6   89.93    6.20   0
  -7 -19  -7   37.68    7.63   0
  -7 -18  -8   51.75    7.67   0
  -7 -17  -9   10.56    6.81   0
  -7 -14 -11   46.95    7.23   0
  -7 -10 -13   -1.14    7.30   0
  -7  -7 -14  132.35    8.51   0
  -7  -3 -15    8.53    5.82   0
  -7  -2 -15   -0.78    7.71   0
  -7  -2  19  -17.83   10.62   0
  -7   5  19   -2.99    7.89   0
  -7   6 -15   15.70    7.73   0
  -7   6  19    8.32   11.21   0
  -7  11 -14   33.85   10.43   0
  -7  14 -13    8.64   11.93   0
  -7  25   8   54.16    8.10   0
  -7  26  -2  156.28   10.94   0
  -7  26   6   93.59   11.71   0
  -6 -21   0   14.34    8.03   0
  -6 -21   4   58.32    7.35   0
  -6 -20  -3   29.27    8.07   0
  -6 -20   7    6.56    7.76   0
  -6 -19  -5  110.92    7.37   0
  -6 -15  -9  119.32    7.77   0
  -6 -12 -11    8.27    6.62   0
  -6 -12  15   -1.00    8.50   0
  -6 -10 -12   10.76    5.23   0
  -6 -10  16    4.46    9.39   0
  -6  -7 -13   10.92    7.25   0
  -6  -7  17    0.33    8.11   0
  -6  -2 -14   -1.27    7.67   0
  -6  -2  18   -2.09    9.12   0
  -6   5  18  117.19    7.84   0
  -6   6 -14    9.12    8.90   0
  -6   6  18    7.22    9.71   0
  -6  11  17    0.04    9.81   0
  -6  14  16   -2.92    8.86   0
  -6  16  15   14.03    9.60   0
  -6  19  13   86.12   10.12   0
  -6  20  12   -1.50    7.49   0
  -6  22  10   43.39    7.53   0
  -6  23  -5   69.59    9.11   0
  -6  23   9  100.29   10.15   0
  -6  24   7   11.65    9.91   0
  -6  25   0   -9.19    9.04   0
  -6  25   3   39.78    6.49   0
  -6  25   4    3.88    7.91   0
  -5 -19  -1    7.87    6.77   0
  -5 -19   5   38.79    7.76   0
  -5 -17  -5  278.83    8.52   0
  -5 -17   9  255.46   14.02   0
  -5 -14  -8    2.63    6.55   0
  -5 -13  -9   40.97    5.20   0
  -5 -11 -10    7.33    6.69   0
  -5  -9 -11   29.91    6.58   0
  -5  -9  15    2.05    8.68   0
  -5  -6 -12    1.51    7.01   0
  -5  -6  16    7.16    7.15   0
  -5  -1 -13  212.24    7.96   0
  -5  -1  17  133.41    8.97   0
  -5   0 -13   -0.02    6.50   0
  -5   0  17  -11.54    8.83   0
  -5   1 -13  205.41    8.36   0
  -5   1  17  139.78    9.74   0
  -5   2  17  183.28    7.92   0
  -5   3 -13  122.41    7.80   0
  -5   3  17  263.67   10.10   0
  -5   4 -13   13.68    7.42   0
  -5   4  17   31.57    8.98   0
  -5   5  17   13.42    7.95   0
  -5  10 -12    6.85    7.86   0
  -5  10  16   56.05    8.85   0
  -5  13  15   40.23    8.70   0
  -5  18  12   23.00    6.33   0
  -5  19  11    0.04    6.05   0
  -5  20  10   52.77    6.19   0
  -5  21   9  130.73    9.16   0
  -5  23   5   -0.76    6.06   0
  -4 -17  -1    5.93    6.92   0
  -4 -17   5  117.55    8.63   0
  -4 -15  -5   20.74    4.98   0
  -4 -14  -6  860.67   10.70   0
  -4 -13  -7   21.24    5.17   0
  -4 -10  -9   23.41    5.39   0
  -4  -4 -11  207.90    8.51   0
  -4   8 -11    7.09    9.52   0
  -4   8  15    8.62    7.20   0
  -4  11  14    6.56    5.45   0
  -4  14  13   87.40    7.35   0
  -4  17  -7   11.59    9.93   0
  -4  17  11    9.57    6.42   0
  -4  18  -6  306.43   11.76   0
  -4  18  10  161.20    8.16   0
  -4  19  -5    8.97    7.51   0
  -4  19   9    3.78    6.82   0
  -4  21   5   79.40    6.60   0
  -3 -15   0   17.42    6.78   0
  -3 -15   4   13.87    6.35   0
  -3 -13  -4  140.87    7.29   0
  -3 -12  -5  307.48    8.28   0
  -3 -11  -6  450.94    9.00   0
  -3  -8  -8  211.11    6.23   0
  -3  -5  -9    5.12    6.34   0
  -3  -1 -10   31.22    6.33   0
  -3  -1  14   36.37    6.96   0
  -3   0 -10    2.69    6.64   0
  -3   0  14   -3.86    6.86   0
  -3   1  14   31.96    5.82   0
  -3   2  14  202.23    6.84   0
  -3   3  14  109.26    6.11   0
  -3   4 -10   76.34    7.67   0
  -3   4  14   27.25    6.77   0
  -3   5  14   26.02    6.27   0
  -3   9  13   41.28    6.93   0
  -3  12  12  111.73    6.58   0
  -3  15  10   62.84    6.57   0
  -3  16   9    5.86    4.49   0
  -3  17   8  182.16    7.48   0
  -3  19   0   16.83    6.86   0
  -3  19   4   44.22    6.96   0
  -2  -7  -6   11.41    5.02   0
  -2  -7  10   11.06    7.62   0
  -2  -5  -7  613.97    9.49   0
  -2  -1  -8   36.41    5.73   0
  -2  -1  12   40.69    6.96   0
  -2   0  -8   67.13    7.54   0
  -2   0  12   40.50    7.51   0
  -2   1  12   49.43    5.51   0
  -2   2  12    7.10    5.20   0
  -2   3  12   10.03    5.17   0
  -2   4  -8    9.53    8.49   0
  -2   4  12   12.39    7.21   0
  -2   5  12  212.67    7.93   0
  -2  11  10    3.39    6.94   0
  -2  16   4    7.80    5.28   0
  -2  16   5   -2.51    6.45   0
  -1  -7  -2  254.42   11.19   0
  -1  -6  -3  298.39    9.42   0
  -1  -6   7   32.67   10.11   0
  -1  -2  -5   42.62    7.32   0
  -1  -2   9  234.97   10.65   0
  -1   5   9  104.74    5.86   0
  -1   6   9  253.74    8.32   0
  -1   8   8   34.53    4.95   0
  -1  10  -3  110.76   10.93   0
  -1  10   7  132.12    7.69   0
  -1  11  -2  655.02   13.80   0
  -1  11   6  212.11    7.98   0
  -1  12   4   43.44    5.45   0
   0   0   4  910.30   19.17   0
   0   3   4    0.90    7.83   0
   0   4   0 9630.72   60.84   0
   0   4   4 1258.73   18.00   0
   0   5   1    4.30    8.12   0
   0   5   3    2.50   11.31   0
 -10 -25  -2    5.07   11.14   0
 -10 -23  -6  140.59   10.86   0
 -10 -17 -12   33.79    8.81   0
 -10 -11 -15   14.22    9.89   0
 -10  -8 -16   -2.31    9.90   0
 -10  -4 -17   -0.78    8.21   0
 -10  -3 -17    6.81   11.20   0
  -9 -24  -2   13.95    9.36   0
  -9 -22  -6   16.38    9.26   0
  -9 -17 -11  113.63    9.19   0
  -9 -14 -13    7.82    6.70   0
  -9 -12 -14    4.19    6.50   0
  -9  -9 -15   17.64    8.14   0
  -9  -5 -16   19.17    9.01   0
  -8 -23  -2   -2.24    7.13   0
  -8 -23   6   -8.29    8.45   0
  -8 -22  -4    8.86    9.00   0
  -8 -21  -6   11.24    6.93   0
  -8 -21  10   17.50   12.13   0
  -8 -20  -7  144.73    8.89   0
  -8 -18  -9  191.17    9.41   0
  -8 -17 -10   11.94    7.52   0
  -8 -14 -12   90.87    6.74   0
  -8 -12 -13   34.02    7.81   0
  -8  -6 -15   95.99    8.79   0
  -8   1 -16   -4.35    6.27   0
  -8   2 -16    5.30    7.87   0
  -8   3 -16   -7.91    7.80   0
  -7 -22  -1    0.40    6.68   0
  -7 -22   5   -0.03    7.39   0
  -7 -12 -12  116.66    6.23   0
  -7  -8  18   87.69   11.27   0
  -7  -6 -14  160.17    8.41   0
  -7  -4  19    6.02    9.67   0
  -7  -3  19    1.69    8.20   0
  -7  -1 -15   -5.72    5.60   0
  -7   0 -15   -5.89    7.51   0
  -7   1 -15   -2.10    7.73   0
  -7   3 -15   11.20    8.12   0
  -7   4 -15    0.36    7.63   0
  -7   5 -15    4.18    7.11   0
  -7  24  -6   53.66   10.03   0
  -7  27   1    6.89    8.82   0
  -7  27   2    1.16   10.39   0
  -7  27   3    8.40   10.12   0
  -6 -21   1    2.85    6.14   0
  -6 -21   2   42.97    7.12   0
  -6 -18  -6   13.77    5.40   0
  -6 -18  10    4.36    9.73   0
  -6 -17  -7   37.38    5.25   0
  -6 -16  -8    8.50    5.35   0
  -6 -13 -10  119.84    8.05   0
  -6  -9 -12  143.21    8.31   0
  -6  -6 -13   -8.22    7.19   0
  -6  -3  18   55.37    9.42   0
  -6  -1 -14   37.55    6.25   0
  -6   0 -14    1.07    7.66   0
  -6   1 -14   51.31    7.91   0
  -6   3 -14  104.68    8.38   0
  -6   4 -14    1.25    7.97   0
  -6   5 -14  322.91   10.04   0
  -6   7  18   16.75    7.42   0
  -6   8  18   15.24    9.69   0
  -6  12  17   -1.40    9.73   0
  -6  18  14   14.47    7.03   0
  -6  21  12    0.61    9.12   0
  -6  22  11    2.86    8.79   0
  -6  24   8    1.11   10.22   0
  -6  25  -1    6.28    8.86   0
  -6  25   5   -0.94    6.96   0
  -6  25   6    3.30    8.77   0
  -5 -19   0   41.09    7.27   0
  -5 -18  -3  103.12    7.21   0
  -5 -16  -6    1.31    5.03   0
  -5 -15  -7  200.76    6.49   0
  -5  -5 -12    5.36    7.09   0
  -5  -2  17  202.89   10.24   0
  -5   2 -13  159.50    6.55   0
  -5   6  17  117.32    7.18   0
  -5   7  17  251.29    9.24   0
  -5  11  16   19.85    8.32   0
  -5  14  15    3.41    8.23   0
  -5  16  14   -1.53    8.41   0
  -5  17  13  146.16    6.87   0
  -5  20  11   32.77    8.10   0
  -5  22  -4    5.55    7.50   0
  -5  22   8    1.93    6.07   0
  -5  23  -2   21.05    7.77   0
  -5  23   6   44.48    6.09   0
  -5  24   2    8.32    8.09   0
  -5  24   3    9.12    7.88   0
  -4 -16  -3    2.32    6.36   0
  -4 -11  -8   14.01    6.38   0
  -4 -10  13   39.41    7.95   0
  -4  -9  -9   14.29    6.51   0
  -4  -8  14   94.21    9.01   0
  -4  -7 -10    2.11    6.29   0
  -4  -5  15    4.29    7.83   0
  -4  -3 -11    3.02    7.25   0
  -4   1  16    6.29    6.88   0
  -4   2  16   37.51    7.84   0
  -4   3  16   12.20    6.87   0
  -4   4  16  186.72    7.94   0
  -4   9  15    5.28    5.70   0
  -4  12  14    3.16    5.62   0
  -4  16  12    1.35    7.70   0
  -4  20  -4   23.91    8.22   0
  -4  20   8   91.82    5.86   0
  -4  21  -2   27.15    7.67   0
  -4  21   6   38.37    5.65   0
  -4  22   1   -3.11    7.64   0
  -4  22   2  155.75    9.17   0
  -4  22   3    8.39    6.89   0
  -3 -15   1   13.25    6.46   0
  -3 -15   3    2.89    6.53   0
  -3 -14  -2   23.40    6.57   0
  -3  -9  -7   76.03    7.10   0
  -3  -8  12  164.36    9.69   0
  -3  -2  14  222.25    8.82   0
  -3   1 -10   26.48    6.47   0
  -3   2 -10  165.26    8.36   0
  -3   3 -10   96.72    7.74   0
  -3   6  14  148.33    7.37   0
  -3   7  14  118.93    7.76   0
  -3   9  -9    4.46    9.41   0
  -3  10  13   32.40    5.50   0
  -3  14  11   18.93    5.35   0
  -3  18  -3    0.92    7.15   0
  -3  18   7   35.48    5.03   0
  -3  19  -1  150.10    8.01   0
  -3  19   5   91.63    5.47   0
  -2 -12   0   72.04    5.96   0
  -2 -12   4   38.09    6.95   0
  -2 -11  -2   29.65    6.98   0
  -2  -8  -5   -6.58    7.29   0
  -2  -5  11  596.70   12.05   0
  -2  -4  -7   -5.12    7.22   0
  -2  -2  12    5.86    6.78   0
  -2   1  -8   29.72    7.26   0
  -2   2  -8   10.81    7.47   0
  -2   3  -8  104.92    8.30   0
  -2   6  12    6.84    7.19   0
  -2   9  11  584.20    8.58   0
  -2  13   9  378.14    8.78   0
  -2  14  -4   -0.36    7.83   0
  -2  14   8    4.19    5.12   0
  -2  15   7  444.94    9.10   0
  -2  16  -1    5.16    7.38   0
  -2  17   2   16.95    6.73   0
  -1  -8   0  104.92    9.79   0
  -1  -4  -4   18.89    7.52   0
  -1  -1  -5   34.00   10.02   0
  -1   7   9  481.91    9.18   0
  -1   9   8    9.93    6.57   0
  -1  12  -1  956.16   14.15   0
  -1  12   5  307.86    7.12   0
  -1  13   1  164.22    8.73   0
  -1  13   2  307.45    9.36   0
  -1  13   3  148.41    7.99   0
   0   2   5   -2.41    9.94   0
   0   3   5   13.55    9.74   0
   0   5   4   -1.90   10.52   0
   0   6   1   -0.62   10.84   0
   0   6   2  117.66   11.91   0
   0   6   3    5.02    9.94   0
 -10 -25  -1    6.11   10.96   0
 -10 -24  -4   10.37    7.99   0
 -10 -22  -7   -6.96    9.97   0
 -10 -18 -11   15.00    8.06   0
 -10 -15 -13    2.39    6.64   0
 -10 -13 -14   85.60    7.35   0
 -10  -7 -16    2.84    9.76   0
 -10  -2 -17    6.28    8.64   0
 -10  -1 -17    1.37   10.09   0
 -10   6 -17    0.67   11.64   0
 -10   7 -17    6.14   10.10   0
  -9 -24  -1    8.99    9.71   0
  -9 -24   6   -3.47    8.46   0
  -9 -23  -4    2.10    6.60   0
  -9 -21  -7  116.38    8.21   0
  -9 -20  -8    0.10    8.47   0
  -9 -19  -9    9.82    8.42   0
  -9 -18 -10   35.51    7.69   0
  -9 -15 -12    5.03    8.81   0
  -9 -13 -13    5.77    9.00   0
  -9 -11 -14   19.46    8.56   0
  -9  -8 -15   13.46    9.29   0
  -9  -4 -16    5.99    7.54   0
  -9   9 -16    1.27   10.24   0
  -9  13 -15    0.66   12.28   0
  -9  16 -14   -1.48   14.49   0
  -8 -23  -1    1.45    7.64   0
  -8 -19  -8   10.50    6.18   0
  -8 -15 -11  -21.13    8.34   0
  -8  -9 -14   16.85    5.98   0
  -8  -5 -15    9.99    8.57   0
  -8  10 -15   40.65   10.50   0
  -8  24  -8    7.74   14.72   0
  -7 -22   0    8.81    7.08   0
  -7 -22   1    1.18    7.49   0
  -7 -21  -3   -0.11    6.98   0
  -7 -20  -5    2.54    5.61   0
  -7 -19  -6  -11.11    7.32   0
  -7 -16  -9   -9.53    7.73   0
  -7 -15 -10   64.65    5.66   0
  -7 -13 -11   16.74    7.83   0
  -7 -11 -12   41.18    8.07   0
  -7  -9 -13    9.43    5.47   0
  -7  -5 -14    5.09    7.70   0
  -7   2 -15    9.31    5.87   0
  -7  25  -5   -0.48   10.29   0
  -7  26  -3   -4.86    9.99   0
  -7  27   0   15.34    9.77   0
  -7  27   4   10.11    8.20   0
  -6 -20  -2   36.43    5.85   0
  -6 -19  -4  446.18    8.18   0
  -6 -14  -9   25.24    6.40   0
  -6 -11 -11   40.43    4.89   0
  -6  -8  17   -0.10    9.05   0
  -6  -5 -13   41.90    8.09   0
  -6  -4  18    1.07    9.50   0
  -6   2 -14    0.76    5.38   0
  -6   9  18   25.36    9.34   0
  -6  10 -13    1.39   10.02   0
  -6  13  17   68.79   10.49   0
  -6  15  16   68.90    7.09   0
  -6  17  15   66.15    6.91   0
  -6  20  13    4.72    7.11   0
  -6  23  10   33.31    7.50   0
  -6  24  -4    4.82    7.69   0
  -6  24   9   -0.43    8.66   0
  -6  25  -2    6.03    8.44   0
  -6  25   7   -5.82    9.09   0
  -5 -19   1    8.55    6.71   0
  -5 -19   2    4.64    6.60   0
  -5 -19   4    7.96    5.90   0
  -5 -18   7   25.91    7.77   0
  -5 -17  -4   33.66    7.13   0
  -5 -13  13   51.03   11.80   0
  -5 -12  -9   39.65    5.50   0
  -5 -10 -10   24.34    6.88   0
  -5  -8 -11  109.43    6.20   0
  -5  -7  16    3.55    7.06   0
  -5  -4 -12    5.20    7.55   0
  -5  -3  17  258.70   10.98   0
  -5   8  17   68.89    9.69   0
  -5  12  16   17.81    8.94   0
  -5  17  -9  244.52   23.82   0
  -5  18  13   10.09    8.67   0
  -5  19  12   10.17    6.61   0
  -5  21  10   15.32    6.59   0
  -5  22   9   19.24    9.47   0
  -5  23   7   -0.55    6.64   0
  -5  24   0   29.62    8.02   0
  -5  24   1   40.27    6.80   0
  -5  24   4   10.39    8.42   0
  -5  24   5    8.13    7.73   0
  -4 -17   0   23.02    5.16   0
  -4 -17   1    4.89    6.96   0
  -4 -17   4   18.59    7.26   0
  -4 -16   7   12.47    7.12   0
  -4 -15  -4   33.90    6.62   0
  -4 -14  -5  124.24    7.19   0
  -4 -13  -6    1.89    6.73   0
  -4 -12  -7   10.74    6.34   0
  -4  -6 -10  117.38    7.62   0
  -4  -2 -11    4.26    7.40   0
  -4  -1  16    8.01    7.52   0
  -4   5  16    4.51    5.80   0
  -4   6  16   13.56    7.99   0
  -4   7 -11   -1.33    8.23   0
  -4  10  15   16.02    5.77   0
  -4  13  14    1.63    5.74   0
  -4  15  13   -3.31    6.15   0
  -4  18  11   88.01    8.51   0
  -4  19  10    1.49    8.19   0
  -4  20   9   25.00    7.09   0
  -4  21   7   25.32    5.75   0
  -4  22   0  136.23    9.40   0
  -4  22   4  161.56    6.40   0
  -4  22   5   22.87    7.13   0
  -3 -14   6   15.04    7.47   0
  -3 -13  -3   43.78    6.79   0
  -3 -10  -6  362.45    8.85   0
  -3  -7  -8  389.16    7.58   0
  -3  -6  13   88.74    7.44   0
  -3  -4  -9   37.05    6.66   0
  -3  -3  14  115.65    7.84   0
  -3   8  14   66.68    7.84   0
  -3  11  13   71.44    7.69   0
  -3  13  12  134.41    6.21   0
  -3  15  11    3.73    7.33   0
  -3  16  10  222.43    6.77   0
  -3  17   9   40.99    5.41   0
  -3  18   8   28.23    7.03   0
  -3  19  -2   27.89    7.84   0
  -3  19   6    8.65    4.79   0
  -3  20   1   48.11    6.90   0
  -3  20   2   99.92    7.21   0
  -3  20   3   -0.03    6.63   0
  -3  20   4   99.40    6.69   0
  -2 -12   3    3.21    6.71   0
  -2 -10  -3   34.00    5.20   0
  -2  -9  -4    5.61    5.26   0
  -2  -6  -6   23.84    7.28   0
  -2   7  12   57.06    6.25   0
  -2   8  12   17.26    7.03   0
  -2  10  11   -0.43    5.66   0
  -2  12  10   28.71    5.55   0
  -2  15  -3  520.43   11.46   0
  -2  15   8   17.06    7.06   0
  -2  16   6   43.79    5.53   0
  -2  17   1  229.11    8.62   0
  -2  17   3   41.13    5.40   0
  -2  17   4   27.86    7.16   0
  -1  -8   4    8.74   11.86   0
  -1  -5   8   15.13    7.86   0
  -1  -3   9  418.06   11.06   0
  -1   0  -5    5.58   10.05   0
  -1   1  10  136.20    8.10   0
  -1   2  10  314.22    9.09   0
  -1   3  10  325.00    8.93   0
  -1   4  10   19.45    6.74   0
  -1   8   9  203.79    8.12   0
  -1  10   8   74.47    7.06   0
  -1  11   7  288.70    6.73   0
  -1  12   6  214.87    6.23   0
  -1  13   0  423.82   10.65   0
  -1  13   4   95.41    5.69   0
  -1  13   5   43.16    6.31   0
   0  -1   4    0.76   10.94   0
   0   1   5   33.40   10.74   0
   0   4   5    0.29    7.33   0
   0   5   0    1.92   11.58   0
   0   5   5   13.56    9.28   0
   0   6   4  578.27   13.31   0
   0   7   2    2.19    9.87   0
 -10 -25   0   -7.46    9.37   0
 -10 -25   1    7.43   10.70   0
 -10 -24  -3    5.58    9.71   0
 -10 -23  -5    4.06    9.28   0
 -10 -21  -8    0.75    6.95   0
 -10 -20  -9   -2.55    7.24   0
 -10 -16 -12  -11.95    8.90   0
 -10 -14 -13    1.43    9.55   0
 -10 -12 -14   -5.98   10.00   0
 -10 -10 -15    3.10    7.55   0
 -10  -6 -16   -8.73   10.24   0
 -10   0 -17    3.35    9.00   0
 -10   1 -17    8.59   10.09   0
 -10   2 -17    1.11    9.97   0
 -10   3 -17    5.11   10.72   0
 -10   4 -17   -2.89   11.08   0
 -10   5 -17    4.36   10.10   0
  -9 -24   0    2.72    8.62   0
  -9 -23  -3    6.22    8.99   0
  -9 -23   8   -1.75   11.52   0
  -9 -22  -5  -10.16    7.53   0
  -9 -22  10    5.89   12.31   0
  -9 -16 -11   84.79    9.71   0
  -9  -7 -15  129.11    9.56   0
  -9  -3 -16   -4.47    8.25   0
  -9  -2 -16   -1.89    8.65   0
  -9   8 -16    8.65   10.37   0
  -8 -23   0    9.79    6.17   0
  -8 -23   1    2.62    8.30   0
  -8 -23   5    1.14    7.42   0
  -8 -22  -3   11.01    7.61   0
  -8 -22   8   -5.81    8.31   0
  -8 -21  -5   14.04    5.96   0
  -8 -20  -6   50.59    8.77   0
  -8 -16 -10    7.51    7.06   0
  -8 -13 -12   -5.81    6.01   0
  -8 -11 -13    0.43    5.79   0
  -8  -8 -14   16.33    7.38   0
  -8  -4 -15  152.10    8.63   0
  -8  23  -9    8.82   13.58   0
  -8  25  -7    0.65   12.21   0
  -7 -22   3    0.60    6.88   0
  -7 -21  -2   96.97    7.97   0
  -7 -21   7    4.32    8.43   0
  -7 -20  -4   72.11    7.39   0
  -7 -18  -7   -1.25    5.69   0
  -7 -17  -8  159.54    6.53   0
  -7 -13  16    2.54   12.34   0
  -7 -11  17    5.55    9.98   0
  -7  -8 -13   21.98    8.55   0
  -7  -5  19    3.62   10.65   0
  -7  10 -14    6.03    8.34   0
  -7  20 -10   46.56   18.32   0
  -7  27  -1    6.83    9.93   0
  -6 -20  -1    6.27    7.22   0
  -6 -20   6    5.61    6.54   0
  -6 -19  -3  272.13    8.45   0
  -6 -18  -5    3.78    5.22   0
  -6 -17  -6   51.93    6.98   0
  -6 -16  -7   12.18    6.35   0
  -6 -15  -8  104.54    6.18   0
  -6 -14  14    1.50   14.28   0
  -6 -12 -10   28.09    6.54   0
  -6 -10 -11   11.35    6.52   0
  -6  -8 -12   35.13    5.04   0
  -6  -5  18  108.94   10.37   0
  -6  -4 -13    5.85    6.67   0
  -6   2  19   14.72    9.06   0
  -6   3  19   40.86    8.71   0
  -6   4  19    9.91    8.56   0
  -6  10  18   -0.76    7.15   0
  -6  11  18   23.08    9.72   0
  -6  14  17    1.50    9.78   0
  -6  16  16   16.43   10.89   0
  -6  18  15  -17.95   11.38   0
  -6  21  13    1.28    9.64   0
  -6  22  12   16.01    9.40   0
  -6  23  11  126.47    9.93   0
  -6  25   8   11.67    8.57   0
  -6  26   0   60.36    8.55   0
  -6  26   1   -3.56    9.51   0
  -6  26   2   35.71    7.80   0
  -6  26   3   16.91    7.80   0
  -6  26   4   31.72   10.14   0
  -6  26   5   17.41    9.05   0
  -5 -18  -2   62.94    5.13   0
  -5 -16  -5  405.42    9.30   0
  -5 -16  10   14.34   11.73   0
  -5 -15  -6   27.77    7.27   0
  -5 -14  -7    3.23    7.44   0
  -5 -13  -8   25.37    5.40   0
  -5  -7 -11  201.13    8.47   0
  -5  -4  17   31.97    8.47   0
  -5  -3 -12   10.73    7.50   0
  -5   9 -12  108.45    8.23   0
  -5   9  17    5.28    6.43   0
  -5  10  17   38.93    7.80   0
  -5  13  16   53.11    8.48   0
  -5  17  14    7.07    8.41   0
  -5  20  12   16.73    8.06   0
  -5  21  11   80.05    8.06   0
  -5  23  -3    3.97    7.49   0
  -5  23   8   10.55    9.17   0
  -5  24  -1   42.29    8.38   0
  -5  24   6   18.98    9.35   0
  -4 -16  -2   13.97    5.16   0
  -4 -10  -8  463.96    9.17   0
  -4  -8  -9    9.39    6.83   0
  -4  -6  15   88.32    8.71   0
  -4  -2  16   29.28    7.82   0
  -4  -1 -11    2.70    7.16   0
  -4   7  16   -2.60    5.75   0
  -4   8  16  128.35    8.52   0
  -4  11 -10   -1.13   10.43   0
  -4  11  15    3.40    5.79   0
  -4  14  14  340.61    9.62   0
  -4  16  13    0.25    7.30   0
  -4  17  12   15.37    5.83   0
  -4  21  -3   24.12    7.58   0
  -4  21   8   17.54    7.97   0
  -4  22  -1    9.27    7.86   0
  -4  22   6  141.14    8.86   0
  -3 -14  -1   51.37    6.60   0
  -3 -12  -4  612.07   10.16   0
  -3 -11  -5  230.59    8.19   0
  -3 -10  11   60.01   10.22   0
  -3  -8  -7   11.98    6.62   0
  -3  -6  -8  433.30    9.43   0
  -3  -3  -9   86.77    7.48   0
  -3   9  14    5.92    7.58   0
  -3  12  13   87.54    8.38   0
  -3  14  -7  128.14   14.99   0
  -3  14  12   14.68    7.85   0
  -3  17  10  126.03    8.06   0
  -3  19   7  140.50    5.88   0
  -3  20   0  179.99    8.25   0
  -3  20   5   42.18    7.65   0
  -2 -11  -1  231.60    9.03   0
  -2 -11   6   10.75    9.03   0
  -2  -3  -7   79.32    6.07   0
  -2  -3  12    9.09    6.82   0
  -2   3  13   44.93    7.25   0
  -2   9  12    5.15    6.78   0
  -2  11  11   63.92    5.62   0
  -2  13  -5  378.28   14.54   0
  -2  13  10   10.75    6.80   0
  -2  14   9   10.24    5.20   0
  -2  16  -2   66.01    8.00   0
  -2  16   7   12.72    5.63   0
  -2  17   0   31.17    5.61   0
  -2  17   5   74.11    6.52   0
  -1  -7  -1  379.78   13.16   0
  -1  -6  -2  160.09   11.62   0
  -1  -5  -3  101.66    8.66   0
  -1  -3  -4    6.83   11.14   0
  -1   0  10   -0.22    6.96   0
  -1   5  -5   62.07   13.82   0
  -1   5  10    5.18    4.83   0
  -1   6  10  107.84    7.55   0
  -1   9   9   32.27    6.74   0
  -1  12   7  233.69    7.91   0
  -1  14   2   11.26    6.47   0
  -1  14   3   36.68    6.55   0
   0   0   5    5.11   10.59   0
   0   6   5    4.02    7.92   0
   0   7   1   22.37   10.86   0
   0   7   3   59.67    7.09   0
   0   7   4    0.15    8.97   0
 -11 -18 -11    3.52   10.79   0
 -11 -15 -13    3.85    9.87   0
 -11 -13 -14   -1.18   10.91   0
 -10 -25   2    0.55   10.05   0
 -10 -24  -2    0.19    9.52   0
 -10 -22  -6    4.64    8.80   0
 -10 -17 -11   17.52    9.12   0
 -10  -9 -15    7.08    8.80   0
 -10  -5 -16   80.58   10.14   0
  -9 -24   1   16.76    7.35   0
  -9 -24   2  -10.86    8.72   0
  -9 -24   3   21.41   10.03   0
  -9 -21  -6   35.10    7.86   0
  -9 -20  -7   10.36    9.03   0
  -9 -17 -10    4.57    7.66   0
  -9 -14 -12    0.72    7.54   0
  -9 -12 -13   12.44    8.30   0
  -9 -10 -14    9.95    6.59   0
  -9  -1 -16   11.85    8.40   0
  -9   7 -16   -1.20   10.13   0
  -9  18 -13   19.34   18.35   0
  -8 -23   2   -0.09    7.35   0
  -8 -23   3    2.10    7.88   0
  -8 -22  -2   10.13    8.30   0
  -8 -21  -4   28.07    8.83   0
  -8 -20  11   42.00   12.86   0
  -8 -19  -7   15.02    5.66   0
  -8 -18  -8   86.61    7.25   0
  -8 -17  -9   31.76    5.62   0
  -8 -14 -11  238.22    8.26   0
  -8 -12 -12   27.33    7.75   0
  -8 -10 -13  155.81    8.14   0
  -8  -7 -14   -3.65    7.87   0
  -8  -3 -15    7.39    7.02   0
  -8   9 -15    7.18    9.31   0
  -8  16 -13   -3.96   13.75   0
  -7 -21  -1    4.84    6.93   0
  -7 -20   9   11.76    8.55   0
  -7 -19  -5   26.30    7.47   0
  -7 -15  -9   14.60    7.75   0
  -7 -14 -10   15.05    6.30   0
  -7 -12 -11    8.42    8.16   0
  -7 -10 -12    7.13    7.63   0
  -7  -9  18    4.16   11.60   0
  -7  -6  19    5.23   12.06   0
  -7  -4 -14   44.27    6.33   0
  -7  -3 -14   68.74    8.60   0
  -7  16 -12  200.51   17.57   0
  -7  26  -4   81.82    8.87   0
  -7  27  -2    3.63    9.46   0
  -6 -20   0   -5.86    6.91   0
  -6 -20   5   26.98    7.23   0
  -6 -19   8  119.56    9.27   0
  -6 -17  11   15.92   11.46   0
  -6 -13  -9   67.12    7.28   0
  -6  -7 -12    7.24    6.49   0
  -6  -3 -13  114.28    7.30   0
  -6  -1  19   55.74    9.68   0
  -6   0  19   -6.35   10.39   0
  -6   1  19   48.02    8.16   0
  -6   5  19  100.44    7.86   0
  -6   6  19    7.19   10.49   0
  -6   7  19   15.38    9.65   0
  -6  12  18    4.85    9.73   0
  -6  13 -12   90.67   11.33   0
  -6  20  14   17.20   10.73   0
  -6  22  -7   -0.39    9.43   0
  -6  23  -6   21.09    9.45   0
  -6  24  10   -7.33   10.84   0
  -6  25  -3   39.69    8.71   0
  -6  26  -1    6.67    8.62   0
  -6  26   6   61.86    9.80   0
  -5 -18  -1  127.69    7.52   0
  -5 -17  -3  468.17    9.78   0
  -5 -11  -9   46.86    5.90   0
  -5 -10  15    2.43    7.71   0
  -5  -9 -10   12.26    5.77   0
  -5  -6 -11   90.58    8.40   0
  -5  -5  17   28.28    9.04   0
  -5  -2 -12   41.07    7.51   0
  -5   1  18    0.22    8.27   0
  -5   2  18   -0.70    9.14   0
  -5   3  18    6.46    8.70   0
  -5   4  18  -13.01    9.00   0
  -5   5  18   15.42    7.93   0
  -5  11  17   87.05   10.03   0
  -5  14  16    4.58    9.66   0
  -5  16  15   99.54   10.18   0
  -5  18  14   68.41    8.94   0
  -5  19  13    6.96    7.08   0
  -5  21  -6    3.82    8.62   0
  -5  22  10    1.12    6.28   0
  -5  23   9    9.56    9.21   0
  -5  24   7   46.09    8.69   0
  -5  25   3  168.31    8.83   0
  -4 -16  -1    8.62    7.18   0
  -4 -15  -3   16.09    6.94   0
  -4 -11  -7   32.20    7.12   0
  -4  -5 -10   13.13    6.75   0
  -4  -3  16   19.23    7.33   0
  -4   0 -11  134.16    7.76   0
  -4   6 -11  261.55    9.74   0
  -4   9  16   19.93    8.45   0
  -4  12  15    3.01    5.98   0
  -4  15  14   -3.46    7.60   0
  -4  18  12  109.26    8.88   0
  -4  19  11   14.29    8.32   0
  -4  20  10  155.04    9.25   0
  -4  21   9   38.00    7.81   0
  -4  22   7    6.00    7.72   0
  -4  23   2    3.84    7.53   0
  -4  23   3   28.22    7.65   0
  -4  23   4   14.02    7.28   0
  -3 -14   0    0.14    6.44   0
  -3  -4  14   35.42    6.86   0
  -3  -2  -9  229.18    8.59   0
  -3   0  15  -10.72    6.68   0
  -3   1  15   45.98    7.47   0
  -3   2  15  136.49    8.30   0
  -3   3  15   41.81    5.94   0
  -3   4  15   28.49    5.93   0
  -3   5  15  -11.48    8.06   0
  -3   6  15   18.31    7.43   0
  -3  10  14   34.02    6.43   0
  -3  13  13   38.94    8.38   0
  -3  15  12   40.16    7.39   0
  -3  16  11   16.15    6.18   0
  -3  18  -4    1.90    8.06   0
  -3  18   9    3.09    5.67   0
  -3  19   8    6.19    8.11   0
  -3  20  -1   38.98    6.90   0
  -3  20   6  232.30    8.75   0
  -2 -10  -2   -2.97    7.43   0
  -2  -7  -5   70.42    6.04   0
  -2  -6  11   14.33    6.45   0
  -2  -5  -6   63.31    8.00   0
  -2  -4  12   -0.52    7.63   0
  -2  -2  -7   -0.67    7.40   0
  -2   0  13   15.83    7.48   0
  -2   1  13  597.42   11.36   0
  -2   2  13   -1.96    5.32   0
  -2   4  13    3.26    5.29   0
  -2   5  13  351.14    8.76   0
  -2   6  13   -3.60    6.98   0
  -2   8  -7    9.69   11.69   0
  -2  10  12   12.85    6.62   0
  -2  12  11   11.37    6.63   0
  -2  14  10   35.78    6.47   0
  -2  15   9  298.75    8.49   0
  -2  16   8   61.91    7.08   0
  -2  17  -1  227.65    9.08   0
  -2  17   6   58.99    6.01   0
  -2  18   2   19.90    7.19   0
  -2  18   3   35.27    8.10   0
  -2  18   4   34.93    6.83   0
  -1  -8   2   20.73    9.47   0
  -1  -8   3  339.54   15.43   0
  -1  -1  10  133.72    8.26   0
  -1   1  -5   37.02   10.34   0
  -1   2  -5   43.57   12.34   0
  -1   7  10  147.33    5.87   0
  -1   9  -4   70.48   12.89   0
  -1  10   9   69.62    7.09   0
  -1  11   8  140.46    5.89   0
  -1  12  -2  340.82   10.52   0
  -1  13  -1  158.95    8.94   0
  -1  13   6  159.02    6.09   0
  -1  14   1   38.11    7.28   0
  -1  14   4   -1.48    5.02   0
  -1  14   5   26.65    6.26   0
   0   1   6    1.99    8.88   0
   0   2   6  214.50    8.30   0
   0   3   6    0.39    5.71   0
   0   4   6  225.46    8.36   0
   0   5   6    2.16    8.49   0
   0   6   0    2.64    7.85   0
   0   7   5   12.07    8.59   0
   0   8   2 1056.36   15.45   0
   0   8   3   -2.87    8.99   0
   0   8   4  551.77   12.01   0
 -11 -21  -8   -6.14    9.58   0
 -11 -20  -9   19.66    9.75   0
 -11 -19 -10    8.68    7.72   0
 -11 -16 -12   99.34   10.82   0
 -11 -10 -15   17.76    9.54   0
 -11  -7 -16   29.34   10.14   0
 -10 -23  -4   94.88    7.89   0
 -10 -21  -7    7.56    6.86   0
 -10 -20  -8   15.49    8.58   0
 -10 -19  -9   81.91    8.82   0
 -10 -18 -10   23.10    7.11   0
 -10 -15 -12   32.76    9.06   0
 -10 -13 -13    1.23   10.14   0
 -10 -11 -14   15.18    8.94   0
 -10  -8 -15   -9.25   10.11   0
 -10  -4 -16   12.00    9.58   0
  -9 -23  -2    8.44    6.08   0
  -9 -22  -4   32.38    6.13   0
  -9 -19  -8    9.14    6.24   0
  -9 -18  -9    9.85    6.13   0
  -9 -15 -11  147.43    9.05   0
  -9  -9 -14    7.97    7.52   0
  -9  -6 -15   36.03    6.79   0
  -9   0 -16   -1.51    6.46   0
  -9   1 -16   -4.67    7.75   0
  -9   2 -16  -11.41    9.02   0
  -9   3 -16    7.27    8.86   0
  -9   4 -16   12.68    8.93   0
  -9   5 -16    2.10    8.74   0
  -9   6 -16    3.94    8.70   0
  -9  12 -15    4.58   11.91   0
  -8 -22  -1    6.80    8.45   0
  -8 -22   7    4.29    7.72   0
  -8 -20  -5  176.55    8.48   0
  -8 -15 -10   37.56    7.69   0
  -8  -6 -14  117.33    8.27   0
  -8  -2 -15   10.84    5.74   0
  -8  -1 -15    6.11    7.92   0
  -8   8 -15   39.82    8.86   0
  -8  13 -14    0.64   10.02   0
  -7 -21   0   79.80    7.56   0
  -7 -21   6   28.05    8.86   0
  -7 -20  -3   31.60    7.95   0
  -7 -18  -6  177.02    8.53   0
  -7 -17  -7   24.25    8.03   0
  -7 -16  -8  238.83    8.70   0
  -7  -7 -13   19.24    5.97   0
  -7  -2 -14  155.99    9.63   0
  -7   9 -14   22.36    8.05   0
  -6 -20   1    8.00    5.83   0
  -6 -20   2   40.33    7.63   0
  -6 -19  -2  214.66    8.07   0
  -6 -18  -4    3.91    4.81   0
  -6 -17  -5  253.74    7.83   0
  -6 -14  -8   15.89    7.00   0
  -6 -11 -10   43.35    7.05   0
  -6 -11  16   17.54    9.01   0
  -6  -9 -11  236.32    8.02   0
  -6  -9  17  135.11   10.68   0
  -6  -6  18    4.86    9.51   0
  -6  -2 -13   -5.42    6.86   0
  -6  -2  19    0.58    8.86   0
  -6   8  19    8.92   11.25   0
  -6   9 -13   73.17    9.15   0
  -6  21  -8   29.64   11.90   0
  -6  24  -5    6.61    9.61   0
  -6  25   9    2.56    7.94   0
  -6  26   7    4.30   11.10   0
  -5 -18   0   12.34    6.57   0
  -5 -18   6  124.49    7.72   0
  -5 -16  -4   34.85    8.05   0
  -5 -12  -8   21.04    5.39   0
  -5  -8  16   24.11    8.24   0
  -5  -1 -12   50.98    7.56   0
  -5  -1  18    4.03    8.08   0
  -5   0  18   -5.59    8.97   0
  -5   6  18   -5.49    6.73   0
  -5   7  18   24.10    9.47   0
  -5   8 -12   -2.38    6.77   0
  -5   8  18   -3.96    8.70   0
  -5  12  17   44.34   10.20   0
  -5  15  16    9.17    8.88   0
  -5  17  15  164.54    9.32   0
  -5  20  -7   23.85    9.41   0
  -5  20  13   19.62    8.83   0
  -5  21  12   -0.16    9.73   0
  -5  22  -5   57.32    8.20   0
  -5  22  11   46.05    9.80   0
  -5  24  -2    5.15    8.75   0
  -5  24   8   15.70    9.44   0
  -5  25   1  162.61    9.62   0
  -5  25   2    9.40    6.11   0
  -5  25   4    4.94    6.47   0
  -5  25   5  141.92    8.95   0
  -4 -16   0  232.18    8.78   0
  -4 -16   6   42.70    8.14   0
  -4 -14  -4  743.49   10.47   0
  -4 -13  -5  104.46    7.55   0
  -4 -12  -6    2.91    6.11   0
  -4  -9  -8    5.38    6.60   0
  -4  -9  14    3.04    8.19   0
  -4  -7  -9   15.90    6.65   0
  -4  -4 -10  136.89    8.02   0
  -4  -4  16  165.63    8.28   0
  -4   1 -11    4.17    5.29   0
  -4   2 -11    3.16    7.39   0
  -4   3 -11    1.14    7.40   0
  -4   3  17    1.54    7.31   0
  -4   4 -11  205.23    8.99   0
  -4   4  17  188.22    9.15   0
  -4   5 -11   14.27    7.09   0
  -4  10  16  170.62    7.30   0
  -4  13  15    5.46    5.91   0
  -4  17  13   27.16    6.15   0
  -4  22  -2  155.87    9.37   0
  -4  22   8  135.50    8.93   0
  -4  23   0    6.30    6.63   0
  -4  23   1   10.43    5.22   0
  -4  23   5    8.84    5.65   0
  -4  23   6    3.26    7.35   0
  -3 -14   1   57.95    6.92   0
  -3 -14   5  171.37    9.81   0
  -3 -13  -2  114.20    5.89   0
  -3  -9  -6    4.04    5.13   0
  -3  -7  13   17.96    6.12   0
  -3  -5  -8   45.26    7.53   0
  -3  -1  -9  137.12    8.04   0
  -3  -1  15   48.43    7.33   0
  -3   7  15    8.78    6.48   0
  -3   8  -9   32.70    8.40   0
  -3   8  15   53.95    7.79   0
  -3  11  14   75.75    6.17   0
  -3  14  13   66.31    6.86   0
  -3  17  -5    3.62    7.31   0
  -3  17  11   84.34    7.18   0
  -3  18  10  145.77    8.35   0
  -3  19  -3  148.27    8.02   0
  -3  19   9   45.32    7.31   0
  -3  20   7    0.83    6.43   0
  -3  21   1    9.67    6.78   0
  -3  21   2  187.13    8.66   0
  -3  21   3   54.16    7.64   0
  -3  21   4  106.74    8.10   0
  -3  21   5   48.58    7.37   0
  -2 -11   0   28.38    7.38   0
  -2  -9  -3  560.17   11.24   0
  -2  -8  -4    1.78    5.60   0
  -2  -1  13  557.35   11.64   0
  -2   7  13   91.65    5.86   0
  -2   8  13    8.74    6.32   0
  -2  11  12   21.59    6.72   0
  -2  13  11  328.83    8.78   0
  -2  17   7   95.38    5.79   0
  -2  18   1    8.80    7.19   0
  -2  18   5   13.72    6.94   0
  -1  -4   9   66.54    7.50   0
  -1  -2  10  329.78    9.58   0
  -1   3  -5   80.35   10.65   0
  -1   3  11  141.11    7.47   0
  -1   4  -5  209.47   15.19   0
  -1   4  11   41.24    6.83   0
  -1   8  10   -2.80    4.79   0
  -1   9  10   -5.53    6.39   0
  -1  11  -3  739.32   15.49   0
  -1  11   9  312.20    7.93   0
  -1  12   8  202.09    6.26   0
  -1  13   7   93.99    5.60   0
  -1  14   0   -0.56    7.03   0
  -1  14   6   26.69    7.23   0
   0  -2   3    0.45   11.44   0
   0  -1   5   33.28   10.86   0
   0   0   6 4316.37   29.99   0
   0   6   6  259.14    7.87   0
   0   7   0   -0.80   10.91   0
   0   7   6   -1.13    6.76   0
   0   8   1    4.10    9.32   0
   0   8   5    4.97    7.77   0
   0   9   3    3.79    8.00   0
 -11 -17 -11   31.55    9.73   0
 -11 -14 -13   -3.27    7.33   0
 -11 -12 -14  100.96    8.37   0
 -11  -9 -15   -9.09   10.37   0
 -11  -6 -16   65.41   10.05   0
 -10 -24  -1   -3.48    6.83   0
 -10 -24   0   -9.88    9.30   0
 -10 -23  -3   -0.46    9.72   0
 -10 -22  -5    2.77    8.81   0
 -10 -16 -11   -3.16    8.68   0
 -10 -10 -14   16.40    9.35   0
 -10  -7 -15   23.70    9.99   0
 -10  -3 -16    9.96    9.12   0
 -10  10 -16   -1.04   11.25   0
  -9 -23  -1   -2.14    6.23   0
  -9 -23   7    0.37    7.82   0
  -9 -22  -3   -5.52    8.55   0
  -9 -21  -5   52.84    8.16   0
  -9 -16 -10    2.21    8.20   0
  -9 -13 -12    6.28    6.20   0
  -9 -11 -13   66.50    6.54   0
  -9  -8 -14    6.90    8.74   0
  -9  -5 -15    7.95    6.54   0
  -8 -22   0    8.69    8.42   0
  -8 -21  -3    8.03    6.95   0
  -8 -21   9    5.97    9.70   0
  -8 -19  -6   32.80    7.22   0
  -8 -18  -7  188.28    8.92   0
  -8 -17  -8   11.96    7.11   0
  -8 -16  -9    3.68    6.74   0
  -8 -13 -11   21.04    7.15   0
  -8 -11 -12   12.88    7.51   0
  -8  -9 -13   12.33    5.80   0
  -8   0 -15   46.54    7.79   0
  -8   1 -15   15.81    8.11   0
  -8   6 -15  100.82   10.19   0
  -8   7 -15    5.84    8.39   0
  -7 -21   1    2.18    7.12   0
  -7 -21   5   -3.15    7.95   0
  -7 -19  -4   11.79    7.64   0
  -7 -13 -10   40.53    5.59   0
  -7 -11 -11   29.20    7.00   0
  -7  -9 -12   19.60    6.10   0
  -7  -6 -13   15.99    7.31   0
  -7  -1 -14   38.22    8.42   0
  -7   8 -14  245.50   10.01   0
  -7  13 -13    3.17    9.98   0
  -7  24  -7    3.98   10.70   0
  -7  25  -6   64.94   11.52   0
  -7  27  -3    1.63    9.58   0
  -6 -19  -1  249.39    8.31   0
  -6 -16  -6   -1.47    5.00   0
  -6 -15  -7   48.88    5.30   0
  -6  -6 -12   -5.49    5.04   0
  -6  -3  19   53.18    8.74   0
  -6  -1 -13   90.50    7.35   0
  -6   8 -13    9.57    8.66   0
  -6  26  -2   49.27    9.86   0
  -6  26   8   19.18   11.57   0
  -6  27   1   38.10   10.42   0
  -6  27   2   93.55   10.09   0
  -6  27   3   64.10    7.11   0
  -6  27   4  100.39    7.64   0
  -6  27   5   27.60   11.43   0
  -5 -18   1  116.05    7.45   0
  -5 -18   5   40.96    7.43   0
  -5 -17  -2   19.79    7.38   0
  -5 -17   8   14.95    8.70   0
  -5 -15  -5  440.20    8.93   0
  -5 -14  -6    1.89    6.36   0
  -5 -13  -7   50.54    5.27   0
  -5 -10  -9    8.91    5.25   0
  -5  -8 -10   18.75    5.39   0
  -5  -6  17  139.34   10.14   0
  -5  -5 -11   13.96    6.31   0
  -5  -2  18   10.99    8.23   0
  -5   0 -12    1.31    7.34   0
  -5   7 -12   22.05    7.42   0
  -5   9  18    6.94    9.94   0
  -5  12 -11   66.53   10.21   0
  -5  13  17   22.77   10.01   0
  -5  19  14   11.47   10.05   0
  -5  23  -4   56.82    8.22   0
  -5  23  10   12.26    7.35   0
  -5  24   9    9.24    8.72   0
  -5  25   0   -2.04    8.38   0
  -5  25   6   -4.93    6.56   0
  -5  25   7   83.45    9.33   0
  -4 -15  -2   25.08    7.31   0
  -4 -12  12   -0.49   11.23   0
  -4  -7  15   14.33    7.20   0
  -4   0  17   54.60    7.85   0
  -4   1  17   13.33    7.80   0
  -4   2  17    9.74    5.91   0
  -4   5  17   11.84    6.66   0
  -4   6  17  124.23    8.89   0
  -4   7  17    9.12    8.29   0
  -4  11  16    6.08    6.58   0
  -4  12  16   13.42    7.86   0
  -4  14  15   35.58    6.46   0
  -4  16  -8   17.62   14.23   0
  -4  16  14    6.31    6.15   0
  -4  18  13   62.24    8.25   0
  -4  19  -6   11.13    9.62   0
  -4  19  12   10.77    5.99   0
  -4  20  -5   56.22    8.22   0
  -4  20  11   67.88    6.49   0
  -4  21  -4    3.50    8.74   0
  -4  21  10   -0.25    9.29   0
  -4  22   9   -0.95    8.14   0
  -4  23   7    8.30    7.49   0
  -3 -12  -3  218.93    6.62   0
  -3 -11  -4  314.77    9.08   0
  -3 -10  -5   66.15    5.55   0
  -3  -9  12   40.42    8.99   0
  -3  -7  -7    3.89    5.15   0
  -3  -5  14   19.12    6.44   0
  -3  -2  15  130.37    7.97   0
  -3   9  15    1.68    7.14   0
  -3  12  14  175.18    6.42   0
  -3  16  12  215.99    6.47   0
  -3  20  -2   94.26    7.25   0
  -3  20   8  142.99    8.75   0
  -3  21   0  150.74    7.36   0
  -3  21   6   93.51    8.76   0
  -2  -9   9  667.72   21.80   0
  -2  -8  10   28.04    8.81   0
  -2  -6  -5    4.74    8.46   0
  -2  -4  -6    7.06    7.99   0
  -2  -2  13   -2.76    7.30   0
  -2  -1  -7 2393.85   19.23   0
  -2   9  13  358.17    8.80   0
  -2  12  12   24.53    6.53   0
  -2  14  11    3.58    5.90   0
  -2  15  10   54.87    6.83   0
  -2  16  -3   20.17    7.09   0
  -2  16   9   32.48    5.17   0
  -2  17  -2   25.41    8.44   0
  -2  17   8   27.72    6.69   0
  -2  18   0    0.04    7.03   0
  -2  18   6   11.15    5.15   0
  -1  -7   0   54.75   10.48   0
  -1  -4  -3   22.42    7.54   0
  -1  -2  -4  244.49   10.60   0
  -1   1  11   62.22    7.28   0
  -1   2  11   76.18    5.51   0
  -1   5  11   47.42    5.73   0
  -1   6  11  189.16    8.11   0
  -1   7  11  276.01    8.49   0
  -1  10  10  118.25    7.66   0
  -1  13   8  254.15    8.28   0
  -1  15   2    5.77    6.85   0
  -1  15   3   98.71    5.64   0
  -1  15   4   12.01    4.81   0
  -1  15   5   45.17    7.32   0
   0  -2   4  289.25   15.26   0
   0   2   7    1.01    7.80   0
   0   3   7    3.24    6.00   0
   0   4   7    3.13    5.36   0
   0   5   7    8.11    7.31   0
   0   6   7    1.32    6.86   0
   0   8   6   17.11    7.27   0
   0   9   2   -1.01    6.55   0
   0   9   4    0.87    5.48   0
   0   9   5   15.67    7.18   0
 -11 -23  -4   -1.94   10.90   0
 -11 -21  -7    8.65    9.00   0
 -11 -20  -8   17.47    9.54   0
 -11 -19  -9   19.24    9.61   0
 -11 -18 -10   16.00    8.74   0
 -11 -15 -12   52.19    9.58   0
 -11 -11 -14    4.68    9.64   0
 -11  -5 -16    7.37    9.72   0
 -10 -24   1    1.07    9.20   0
 -10 -21  -6    8.87    7.64   0
 -10 -20  -7   21.31    9.46   0
 -10 -19  -8  196.54    9.86   0
 -10 -18  -9  -14.61    8.89   0
 -10 -17 -10   40.91    7.05   0
 -10 -14 -12   15.39    6.99   0
 -10 -12 -13    9.09    6.15   0
 -10  -2 -16    9.59    9.14   0
 -10  -1 -16   59.43   10.10   0
 -10   9 -16  116.92   12.00   0
  -9 -23   0    5.83    6.46   0
  -9 -23   1   10.29    8.27   0
  -9 -23   6    3.73    9.13   0
  -9 -22   9   -1.60   10.72   0
  -9 -20  -6  -10.93    6.59   0
  -9 -19  -7    0.87    7.33   0
  -9 -18  -8   15.16    7.82   0
  -9 -17  -9  240.72    7.51   0
  -9 -14 -11   21.57    8.64   0
  -9 -10 -13   -0.99    8.11   0
  -9  -4 -15   -3.26    6.16   0
  -9  11 -15   74.99   11.87   0
  -9  15 -14    5.11   12.58   0
  -8 -22   1    4.05    8.62   0
  -8 -22   6    3.33    7.33   0
  -8 -21  -2   13.27    7.70   0
  -8 -20  -4   68.21    8.26   0
  -8 -14 -10   92.56    7.76   0
  -8  -8 -13   83.41    7.65   0
  -8  -5 -14    6.21    6.13   0
  -8   2 -15    9.98    7.34   0
  -8   3 -15    8.14    7.93   0
  -8   4 -15  162.02   10.18   0
  -8   5 -15   12.32    8.46   0
  -8  22 -10   19.83   17.55   0
  -7 -21   2   68.68    7.50   0
  -7 -21   3    9.99    7.15   0
  -7 -20  -2   77.19    6.78   0
  -7 -18  -5   12.02    7.90   0
  -7 -15  -8  136.60    7.97   0
  -7 -14  -9   72.52    5.89   0
  -7  -8 -12  181.24    8.47   0
  -7  -5 -13    7.04    7.60   0
  -7   0 -14    3.50    6.03   0
  -7   1 -14   28.35    8.93   0
  -7   7 -14  155.66    9.22   0
  -7  23  -8    3.01   11.18   0
  -7  26  -5    0.86   10.77   0
  -6 -19   7  143.28    9.19   0
  -6 -18  -3   -5.40    4.80   0
  -6 -12  -9    2.52    5.02   0
  -6 -10 -10    2.06    6.72   0
  -6  -8 -11   13.02    5.38   0
  -6  -7  18    9.20    8.25   0
  -6  -5 -12  167.59    7.55   0
  -6   0 -13    5.25    5.87   0
  -6   1 -13   81.46    6.93   0
  -6   7 -13   18.61    7.82   0
  -6  25  -4    2.37    8.07   0
  -6  27   0  101.96   10.54   0
  -6  27   6  132.99    8.73   0
  -5 -18   2   62.52    7.13   0
  -5 -18   4  370.05    9.69   0
  -5 -16  -3  269.64    8.55   0
  -5 -15  11   71.20   18.99   0
  -5 -12  14   19.10    9.77   0
  -5 -11  -8   54.83    6.85   0
  -5  -7 -10   75.02    7.08   0
  -5  -4 -11   16.81    7.13   0
  -5  -3  18    9.91    8.09   0
  -5   1 -12   43.26    5.72   0
  -5   2 -12   35.16    7.57   0
  -5   3 -12   22.32    7.93   0
  -5   4 -12   12.63    7.52   0
  -5   5 -12   12.94    6.95   0
  -5   6 -12    3.03    6.83   0
  -5  10  18   14.85    7.94   0
  -5  11  18   13.04    8.35   0
  -5  14  17   13.76    9.82   0
  -5  16  16    4.81    7.11   0
  -5  18  15   -2.66    7.35   0
  -5  21  13  116.39   10.12   0
  -5  22  12    5.43    9.09   0
  -5  23  11   -8.27    9.22   0
  -5  24  -3   11.49    8.35   0
  -5  25  -1  160.12    9.71   0
  -5  25   8    6.96    8.46   0
  -5  26   3   66.10    8.11   0
  -5  26   4   10.93    8.34   0
  -4 -16   1    4.05    6.55   0
  -4 -16   5   17.75    8.46   0
  -4 -15   8    6.12    8.22   0
  -4 -14  -3   89.03    7.22   0
  -4 -10  -7  151.05    5.94   0
  -4  -8  -8  389.05    8.85   0
  -4  -6  -9  385.53    7.46   0
  -4  -5  16    5.84    7.23   0
  -4  -3 -10    7.86    4.85   0
  -4  -1  17   11.87    8.17   0
  -4   8  17    1.07    6.26   0
  -4   9  17   21.28    8.94   0
  -4  13  16   -2.28    7.85   0
  -4  15  15    3.57    8.78   0
  -4  17  14    6.83    8.99   0
  -4  20  12   72.02    8.01   0
  -4  21  11    3.55    8.00   0
  -4  22  -3    8.10    6.92   0
  -4  23  -1   -4.53    7.53   0
  -4  23   8   16.01    7.69   0
  -4  24   2  183.43    9.04   0
  -4  24   3    8.26    7.81   0
  -4  24   4  184.12    9.59   0
  -4  24   5    8.19    7.05   0
  -3 -14   3  112.33    7.57   0
  -3 -14   4   35.59    6.74   0
  -3 -13  -1    4.76    4.95   0
  -3  -8  -6  116.44    8.01   0
  -3  -4  -8   89.50    5.86   0
  -3  -3  15   61.39    8.84   0
  -3   0  -9    1.24    5.06   0
  -3   1  -9  151.98    8.25   0
  -3   7  -9    1.84    7.86   0
  -3  10  15   -1.98    5.56   0
  -3  13  14   90.60    6.39   0
  -3  15  13    0.78    5.68   0
  -3  16  -6  359.91   14.12   0
  -3  17  12  104.97    7.78   0
  -3  18  11   -6.32    7.63   0
  -3  19  10   10.77    7.62   0
  -3  20   9   27.04    7.21   0
  -3  21   7   14.38    7.21   0
  -3  22   3   95.50    7.97   0
  -2 -10  -1    7.96    7.36   0
  -2  -5  12  222.04    9.07   0
  -2   0  -7   16.38    8.25   0
  -2   2  14   14.32    6.25   0
  -2   3  14    8.50    6.82   0
  -2   4  14    1.90    6.96   0
  -2   5  14   48.77    6.99   0
  -2   6  14   -3.82    6.23   0
  -2  10  13    7.21    4.81   0
  -2  13  12    5.15    7.00   0
  -2  15  -4   29.51    7.13   0
  -2  16  10   31.09    7.00   0
  -2  17   9   82.88    6.51   0
  -2  18  -1    6.44    6.54   0
  -2  18   7   15.29    5.15   0
  -2  19   2   32.57    6.93   0
  -2  19   3  423.55    7.46   0
  -2  19   4   34.48    5.24   0
  -2  19   5  288.46    8.27   0
  -1  -6  -1  166.30   12.45   0
  -1  -5  -2   19.54   10.96   0
  -1  -3  10  350.33    9.74   0
  -1   0  11    5.05    6.83   0
  -1   8  11   68.13    7.13   0
  -1  11  10  199.73    7.89   0
  -1  12   9  385.82    7.67   0
  -1  13  -2  314.64   11.53   0
  -1  14  -1   37.57    7.33   0
  -1  15   1  125.21    6.08   0
  -1  15   6   10.41    6.65   0
   0  -1   6   -0.64    8.73   0
   0   1   7   85.39    8.76   0
   0   4  -1    0.65   11.93   0
   0   5  -1    7.71   13.94   0
   0   7   7   -4.20    6.88   0
   0   8   0  196.27   11.30   0
   0   9   1   25.88    9.19   0
   0   9   6    3.75    7.18   0
   0  10   2 1677.45   16.74   0
   0  10   3    1.63    7.61   0
   0  10   4  244.41    8.94   0
 -11 -24  -1    7.09   11.47   0
 -11 -22  -5   10.45    9.76   0
 -11 -16 -11   31.19   10.30   0
 -11 -13 -13   33.21    7.02   0
 -11  -8 -15    3.47    7.13   0
 -11  -4 -16    7.49    9.08   0
 -10 -24   2   10.15    8.62   0
 -10 -24   3   15.20    9.78   0
 -10 -24   4    4.32   10.51   0
 -10 -23  -2   96.88    7.54   0
 -10 -22  -4    7.51    7.10   0
 -10 -15 -11   -5.38    7.65   0
 -10  -9 -14  119.28    7.05   0
 -10  -6 -15   13.00    6.69   0
 -10   0 -16   13.70   10.28   0
 -10   8 -16   -3.29    9.79   0
  -9 -23   2    6.99    8.00   0
  -9 -23   3    4.36    8.47   0
  -9 -22  -2    0.51    7.77   0
  -9 -21  -4   14.56    6.40   0
  -9 -15 -10   50.75    8.41   0
  -9 -12 -12   -3.62    6.52   0
  -9  -7 -14    3.07    6.25   0
  -9  -3 -15   46.62    7.06   0
  -9  -2 -15   -3.28    8.99   0
  -8 -22   2    7.44    7.54   0
  -8 -22   3   15.58    9.00   0
  -8 -22   5    3.68    7.13   0
  -8 -19  -5    6.05    7.59   0
  -8 -19  12    2.90   12.45   0
  -8 -15  -9   12.06    7.47   0
  -8 -12 -11   24.37    6.83   0
  -8 -10 -12   34.00    5.63   0
  -8  -7 -13    4.00    7.02   0
  -8  -4 -14  117.70    6.40   0
  -8  12 -14   43.61    9.67   0
  -7 -20  -1    7.96    8.60   0
  -7 -20   8   35.40    8.32   0
  -7 -19  -3   95.36    8.49   0
  -7 -19  10   -0.52    8.50   0
  -7 -17  -6  198.16    6.53   0
  -7 -16  -7   28.22    5.90   0
  -7 -12 -10  258.46    6.57   0
  -7 -10 -11   35.08    5.24   0
  -7 -10  18    3.28   11.37   0
  -7  -4 -13   23.29    7.65   0
  -7   2 -14  146.05    7.45   0
  -7   3 -14   58.74    8.49   0
  -7   4 -14   57.48    8.03   0
  -7   5 -14   15.31    7.91   0
  -7   6 -14  148.26    8.35   0
  -6 -19   0   61.43    6.77   0
  -6 -18  -2   34.14    6.94   0
  -6 -18   9    8.72    8.91   0
  -6 -17  -4   91.47    5.68   0
  -6 -16  -5   55.78    7.00   0
  -6 -16  12    5.91   15.42   0
  -6 -14  -7   23.23    7.04   0
  -6 -13  -8   71.79    5.36   0
  -6  -7 -11   -0.21    6.75   0
  -6  -4 -12   14.29    6.91   0
  -6  -4  19   16.36    9.55   0
  -6   2 -13    4.81    6.31   0
  -6   3 -13  109.95    7.63   0
  -6   4 -13    8.12    6.72   0
  -6   5 -13   53.59    8.32   0
  -6   6 -13    8.89    7.05   0
  -6  26  -3   27.31    8.49   0
  -6  27  -1   54.93    9.28   0
  -5 -17  -1  276.17    7.16   0
  -5 -15  -4   81.02    7.59   0
  -5 -12  -7  202.06    8.09   0
  -5  -9  -9   18.54    5.29   0
  -5  -9  16    6.44    8.65   0
  -5   3  19   60.64    8.94   0
  -5   4  19  -12.13    9.22   0
  -5   5  19   23.91    9.21   0
  -5   6  19   41.37    8.82   0
  -5  12  18   25.57   10.41   0
  -5  15  17   78.97   11.57   0
  -5  17  16   15.00   10.98   0
  -5  19  -8    7.76   11.01   0
  -5  19  15   41.51   10.75   0
  -5  20  14   37.39    7.08   0
  -5  24  10   18.20    7.42   0
  -5  26   1   55.53    9.07   0
  -5  26   2    5.27    6.16   0
  -5  26   5   18.93    7.50   0
  -5  26   6    6.67    9.94   0
  -4 -16   4   35.57    6.90   0
  -4 -15  -1    4.95    7.24   0
  -4 -13  -4   10.51    6.20   0
  -4 -12  -5   52.97    7.11   0
  -4 -11  -6    8.80    4.90   0
  -4  -2 -10   65.09    6.69   0
  -4  -2  17   10.08    7.96   0
  -4  10 -10   89.88   10.13   0
  -4  10  17   41.82    9.05   0
  -4  14  16  215.23    8.96   0
  -4  16  15    1.67    8.58   0
  -4  18  14  114.10    8.64   0
  -4  19  13    9.05    6.05   0
  -4  22  10   84.50    6.94   0
  -4  23   9    8.37    7.60   0
  -4  24   1   15.93    7.81   0
  -4  24   6  233.10    9.64   0
  -3 -12  -2  486.87   10.26   0
  -3  -9  -5   68.54    7.25   0
  -3  -6  -7   92.99    5.99   0
  -3  -6  14  136.21    8.53   0
  -3  -3  -8  114.28    8.27   0
  -3   1  16   55.82    7.72   0
  -3   2  -9  221.04    8.89   0
  -3   2  16  290.49    9.31   0
  -3   3  16  106.07    6.60   0
  -3   4  16   -7.35    5.85   0
  -3   5  16    5.53    5.71   0
  -3   6  -9   24.72    8.14   0
  -3   6  16  168.31    8.67   0
  -3   7  16  106.77    8.37   0
  -3  11  15   89.60    6.17   0
  -3  12  15  135.37    7.62   0
  -3  14  14   -1.06    5.59   0
  -3  16  13    1.22    7.71   0
  -3  21  -1    5.61    7.96   0
  -3  21   8  139.49    8.40   0
  -3  22   1   35.48    7.43   0
  -3  22   2   95.40    8.41   0
  -3  22   4   21.93    5.92   0
  -3  22   5   43.85    7.59   0
  -3  22   6   65.57    7.07   0
  -2 -11   5  232.37   11.81   0
  -2  -9  -2   14.75    8.03   0
  -2  -8  -3   -1.83    8.03   0
  -2  -7  -4  110.63    7.10   0
  -2  -7  11    5.22    7.31   0
  -2  -3  -6    4.44    8.16   0
  -2  -3  13   53.62    7.62   0
  -2   1  -7 2436.36   21.70   0
  -2   1  14   40.47    6.99   0
  -2   7  14    8.68    4.86   0
  -2   8  14   -0.61    7.65   0
  -2  11  13   37.60    5.49   0
  -2  15  11  162.30    6.06   0
  -2  18   8   11.08    4.73   0
  -2  19   1  339.08    8.12   0
  -2  19   6   -2.44    4.83   0
  -1  -6   8   36.57    9.88   0
  -1  -1  -4  195.72   12.52   0
  -1  -1  11   52.81    7.56   0
  -1   9  11   16.46    5.14   0
  -1  12  10  213.54    8.36   0
  -1  13   9  188.10    8.05   0
  -1  14   8    9.37    5.11   0
  -1  15   0    3.32    6.56   0
  -1  15   7   51.73    6.72   0
  -1  16   2   -2.30    7.27   0
  -1  16   3   52.74    7.58   0
  -1  16   4   25.58    6.95   0
  -1  16   5   51.97    7.27   0
   0  -2   2  833.62   40.81   0
   0  -2   5    0.66    9.81   0
   0   0   7   -0.64    7.54   0
   0   3  -1   19.66   14.92   0
   0   3   8    3.37    7.20   0
   0   4   8  561.98   10.48   0
   0   5   8   -0.07    6.92   0
   0   6   8  412.10    9.64   0
   0   8   7   -1.51    5.37   0
   0  10   5    1.36    5.11   0
 -11 -24   0    6.52   11.11   0
 -11 -23  -3   30.63    9.37   0
 -11 -21  -6   -5.63    9.13   0
 -11 -17 -10   36.39    8.63   0
 -11 -14 -12    9.14    8.99   0
 -11 -12 -13   96.90   10.06   0
 -11 -10 -14   13.28    7.65   0
 -11  -7 -15   -1.92    8.85   0
 -11  -3 -16    3.53    7.52   0
 -10 -23  -1   11.29    8.52   0
 -10 -22  -3    9.40    9.25   0
 -10 -21  -5   10.00    6.23   0
 -10 -16 -10    6.40    6.49   0
 -10 -13 -12  178.11    7.30   0
 -10 -11 -13    0.62    6.36   0
 -10  -8 -14   11.83    8.64   0
 -10  -5 -15   95.09    6.61   0
 -10   1 -16   46.43    7.62   0
 -10   2 -16   -2.20    8.99   0
 -10   3 -16   -8.30   10.35   0
 -10   4 -16    7.57    9.76   0
 -10   5 -16   69.25   10.79   0
 -10   6 -16    9.03   10.28   0
 -10   7 -16   -4.04    8.42   0
  -9 -22  -1   -1.29    8.08   0
  -9 -20  -5   20.67    5.75   0
  -9 -19  -6   40.75    8.11   0
  -9 -16  -9  137.78    7.91   0
  -9 -13 -11   27.64    8.06   0
  -9 -11 -12   10.81    7.55   0
  -9  -9 -13   11.10    7.53   0
  -9  -6 -14   20.15    7.68   0
  -9  -1 -15   22.49    8.69   0
  -9  10 -15    1.95    9.13   0
  -8 -21  -1   33.25    7.26   0
  -8 -21   8   13.72    8.99   0
  -8 -20  -3  140.36    8.27   0
  -8 -18  -6  145.64    6.47   0
  -8 -17  -7   10.06    6.59   0
  -8 -16  -8   31.04    5.67   0
  -8 -13 -10    9.13    7.40   0
  -8  -3 -14   -4.38    5.72   0
  -8  18 -12  107.24   19.46   0
  -7 -20   0  129.14    9.34   0
  -7 -18  -4  189.63    8.12   0
  -7 -13  -9   35.88    5.62   0
  -7 -12  17    2.51   10.51   0
  -7  -7 -12  163.52    6.39   0
  -7  -3 -13   26.48    7.54   0
  -7  12 -13    1.51    8.75   0
  -7  18 -11   27.49   19.02   0
  -7  27  -4   18.93   10.89   0
  -6 -19   1  251.69    7.89   0
  -6 -19   6  312.34   10.36   0
  -6 -15  -6  176.59    6.30   0
  -6 -11  -9   22.87    5.04   0
  -6  -9 -10   44.67    6.80   0
  -6  -5  19   86.13    9.26   0
  -6  -3 -12   73.81    7.47   0
  -6  12 -12   24.39   10.28   0
  -6  28   1   15.15    9.56   0
  -6  28   2  -15.35   11.04   0
  -6  28   3    3.43    8.17   0
  -5 -17   0   28.13    8.02   0
  -5 -14  -5   40.79    5.00   0
  -5 -13  -6  194.10    6.51   0
  -5 -10  -8  147.26    7.43   0
  -5  -7  17  253.97   10.03   0
  -5  -6 -10   -5.48    6.57   0
  -5  -4  18    6.05    8.46   0
  -5  -3 -11   88.49    5.89   0
  -5   0  19   15.37    8.85   0
  -5   1  19   67.06   10.82   0
  -5   2  19   55.36    7.72   0
  -5   7  19  105.87    8.10   0
  -5   8  19   61.24   10.10   0
  -5   9  19    4.73    9.97   0
  -5  13  18    2.01   11.11   0
  -5  22  13   50.92    8.37   0
  -5  23  12   22.90    7.89   0
  -5  24  11   15.32   10.77   0
  -5  25  -2    0.09    8.52   0
  -5  25   9   98.25    7.55   0
  -5  26   0   -2.25    8.59   0
  -5  26   7   70.97    9.45   0
  -4 -11  13   19.80   10.66   0
  -4  -9  -7   10.66    6.00   0
  -4  -8  15    8.60    7.57   0
  -4  -7  -8   20.94    6.66   0
  -4  -6  16   18.94    8.60   0
  -4  -5  -9   19.86    4.91   0
  -4  -3  17   10.25    7.05   0
  -4  -1 -10   -0.36    6.76   0
  -4   3  18   12.90    7.84   0
  -4   4  18  122.51    8.88   0
  -4   5  18   22.84    7.98   0
  -4   6  18   61.46    8.15   0
  -4  11  17    6.98    6.07   0
  -4  12  17   -7.10    8.64   0
  -4  15  16    8.85    8.73   0
  -4  17  15   10.43    8.86   0
  -4  18  -7   64.81   12.58   0
  -4  20  13   53.25    9.19   0
  -4  21  12    4.14    9.48   0
  -4  22  11   11.28    8.68   0
  -4  23  -2    3.48    7.81   0
  -4  24   0  236.75    9.04   0
  -4  24   7    5.70    6.91   0
  -4  24   8  179.63    8.54   0
  -3 -13   0   70.91    5.76   0
  -3 -13   7   45.71    9.26   0
  -3 -11  -3  240.44    8.80   0
  -3 -10  -4  100.98    7.43   0
  -3  -8  13   49.90    8.52   0
  -3  -4  15   35.92    8.17   0
  -3   0  16    2.50    8.22   0
  -3   3  -9   90.88    7.71   0
  -3   4  -9   39.99    7.22   0
  -3   5  -9    3.90    6.41   0
  -3   8  16   46.50    6.13   0
  -3   9  16   14.82    7.53   0
  -3  13  15   20.64    7.73   0
  -3  15  14   -5.93    8.58   0
  -3  17  13  -14.37    7.66   0
  -3  18  12   82.51    6.35   0
  -3  19  -4   18.48    7.81   0
  -3  19  11   93.31    6.24   0
  -3  20  -3   -1.79    7.33   0
  -3  20  10   97.00    6.69   0
  -3  21   9   12.62    7.62   0
  -3  22   7   72.20    8.07   0
  -2 -11   3  513.86   12.50   0
  -2 -11   4   35.78    8.50   0
  -2  -5  -5  481.13    9.48   0
  -2   0  14   46.22    5.36   0
  -2   2  -7    3.57    7.49   0
  -2   7  -7  149.37   11.48   0
  -2   9  14   17.48    7.24   0
  -2  12  13    2.95    5.57   0
  -2  14  12   -0.82    5.17   0
  -2  16  11   22.50    8.00   0
  -2  17  10    2.55    7.32   0
  -2  18   9   -3.53    7.37   0
  -2  19   0  213.35    8.84   0
  -2  19   7  324.69    7.41   0
  -2  20   3    8.09    6.95   0
  -2  20   4   15.52    6.51   0
  -2  20   5   -0.25    6.21   0
  -1  -5   9  105.76    8.07   0
  -1  -3  -3   10.94   11.12   0
  -1  -2  11   80.00    6.99   0
  -1   2  12  185.63    8.43   0
  -1   3  12  126.08    6.15   0
  -1   4  12   17.13    5.26   0
  -1   5  12    6.56    4.82   0
  -1   6  12   79.14    5.64   0
  -1   7  12  100.55    7.49   0
  -1  10  11   83.69    6.23   0
  -1  11  11  272.99    8.53   0
  -1  12  -3  449.13   13.95   0
  -1  14   9   34.09    7.53   0
  -1  15   8   18.06    7.43   0
  -1  16   1   88.81    7.24   0
  -1  16   6   14.57    7.09   0
   0   1   8    5.17    7.12   0
   0   2   8  712.13   10.98   0
   0   6  -1   -0.37   10.74   0
   0   7   8   -3.54    5.24   0
   0   8   8  360.65    9.09   0
   0   9   0   -5.54    8.47   0
   0   9   7    5.38    5.28   0
   0  10   1    1.50    6.03   0
   0  10   6  671.39    9.35   0
   0  11   2   -7.64    7.33   0
   0  11   3  104.39    5.99   0
   0  11   4   -3.96    4.93   0
   0  11   5   34.83    7.52   0
 -12 -16 -11    1.82   10.40   0
 -12 -13 -13   18.21    8.64   0
 -11 -23  -2   -0.42    9.96   0
 -11 -20  -7   56.48    7.51   0
 -11 -19  -8    4.94    6.98   0
 -11 -18  -9   -0.98    7.24   0
 -11 -15 -11    7.28    9.90   0
 -11  -9 -14   -5.06    9.82   0
 -11  -6 -15    6.71   10.09   0
 -11  -2 -16   85.53    7.55   0
 -11  -1 -16   -4.27    9.99   0
 -10 -23   0   56.94   10.44   0
 -10 -20  -6   -2.67    6.35   0
 -10 -19  -7   81.54    6.87   0
 -10 -18  -8   34.34    6.65   0
 -10 -17  -9   55.28    6.68   0
 -10 -14 -11   13.90    7.84   0
 -10 -12 -12    0.66    8.59   0
 -10 -10 -13    1.89    9.52   0
 -10  -4 -15    0.85    6.11   0
 -10  13 -15    2.67   12.87   0
  -9 -22   0   16.43    8.21   0
  -9 -22   8    4.66    9.89   0
  -9 -21  -3   85.06    6.74   0
  -9 -18  -7   35.93    5.99   0
  -9 -17  -8   16.94    5.69   0
  -9 -14 -10   -2.39    7.75   0
  -9  -8 -13   29.88    8.50   0
  -9  -5 -14    6.92    8.55   0
  -9   0 -15    1.01    7.95   0
  -9   9 -15   22.73    9.33   0
  -8 -21   0    6.83    7.62   0
  -8 -19  -4    2.96    7.11   0
  -8 -11 -11   -0.17    5.92   0
  -8  -9 -12   -6.28    5.81   0
  -8  -6 -13  216.54    8.71   0
  -8  -2 -14   -6.49    5.38   0
  -8  11 -14   11.27    9.01   0
  -8  15 -13    2.46   11.62   0
  -7 -20   1   10.36    8.37   0
  -7 -20   7   10.22    7.17   0
  -7 -19  -2    7.44    6.91   0
  -7 -17  -5   49.67    7.89   0
  -7 -15  -7    5.66    6.37   0
  -7 -14  -8   17.18    4.51   0
  -7 -11 -10   45.92    4.86   0
  -7  -9 -11    5.38    5.12   0
  -7  -6 -12  229.56    8.07   0
  -7  -2 -13    3.83    6.83   0
  -7  22  -9    2.94   13.52   0
  -6 -19   2  211.71    7.24   0
  -6 -18  -1    4.34    6.82   0
  -6 -17  -3  142.87    7.18   0
  -6 -12  -8    5.61    6.76   0
  -6 -10  17    1.82   11.02   0
  -6  -8  18    0.40    9.46   0
  -6  -6 -11   16.43    6.75   0
  -6  24  -6    4.02    9.48   0
  -6  25  -5    0.08    9.97   0
  -6  28   0   -6.22   10.06   0
  -5 -17   1  256.37    9.09   0
  -5 -17   7  233.23    9.65   0
  -5 -16  -2   15.03    5.19   0
  -5 -11  15   90.46   12.08   0
  -5  -8  -9  233.80    6.50   0
  -5  -5  18    2.44    9.31   0
  -5  -2 -11   43.49    6.53   0
  -5  10  19    3.93   11.92   0
  -5  11 -11   87.06    9.74   0
  -5  22  -6    4.60    8.46   0
  -5  23  -5   -0.35    8.22   0
  -5  24  -4   -3.77    9.84   0
  -5  25  10   -9.95    7.92   0
  -5  26   8    6.48    7.77   0
  -5  27   4   14.35    9.60   0
  -4 -15   0   19.48    5.27   0
  -4 -14  -2  394.09    7.65   0
  -4 -10  -6  765.65   10.39   0
  -4  -4  -9  246.10    8.14   0
  -4   0 -10  219.65    8.56   0
  -4   1  18   -1.79    7.67   0
  -4   2  18   37.99    8.48   0
  -4   7  18   -0.07    6.62   0
  -4  13  17    5.98    9.86   0
  -4  19  14    7.15    9.48   0
  -4  23  10   -0.62    7.24   0
  -4  24  -1   -8.82    7.38   0
  -4  25   2   -2.23    9.28   0
  -4  25   3   14.66    9.31   0
  -4  25   4   53.38    6.49   0
  -4  25   5   27.77    9.83   0
  -4  25   6   -5.84    8.02   0
  -3 -13   1    7.27    6.63   0
  -3  -7  -6  579.71    8.95   0
  -3  -5  -7   23.19    4.94   0
  -3  -2  -8  196.36    8.59   0
  -3  -1  16   51.67    8.88   0
  -3  10  16   58.58    6.39   0
  -3  14  15   -1.75    7.88   0
  -3  18  -5    6.17    8.19   0
  -3  19  12   -1.13    7.48   0
  -3  20  11   14.47    8.18   0
  -3  21  -2  175.41    8.76   0
  -3  22   0  133.54    6.84   0
  -3  22   8   33.93    8.17   0
  -3  23   3   11.57    7.82   0
  -3  23   4   14.08    7.81   0
  -3  23   5   -4.21    7.73   0
  -2 -10   0   44.47    6.53   0
  -2  -6  12   -2.65    7.28   0
  -2  -4  13    5.41    7.42   0
  -2  -2  -6   10.38    8.69   0
  -2  -1  14   41.62    5.62   0
  -2   3  -7   77.51    8.97   0
  -2   6  -7    2.08    8.91   0
  -2  10  14   18.67    6.01   0
  -2  11  14    4.84    8.66   0
  -2  13  13   54.85    5.87   0
  -2  14  -5    8.57    8.24   0
  -2  15  12   39.69    6.18   0
  -2  17  -3   47.39    7.36   0
  -2  18  -2    9.17    7.42   0
  -2  19   8   62.64    5.54   0
  -2  20   1   -0.61    6.78   0
  -2  20   2   79.04    5.67   0
  -2  20   6   38.68    7.25   0
  -1  -4  10   23.04    6.42   0
  -1   1  12   55.97    5.71   0
  -1   8  12   14.02    5.55   0
  -1   9  12    5.46    7.35   0
  -1  10  -4  336.35   15.90   0
  -1  12  11  274.04    7.96   0
  -1  13  10  164.48    6.48   0
  -1  15  -1  130.17    7.90   0
  -1  16   7   11.60    5.32   0
  -1  17   3  135.42    8.07   0
  -1  17   4  178.28    8.14   0
  -1  17   5    8.89    6.81   0
   0  -2   6  217.42   11.82   0
   0  -1   7   82.96    9.00   0
   0   3   9   14.70    7.10   0
   0   4   9   -0.54    7.38   0
   0   5   9   10.23    6.92   0
   0   6   9    5.08    6.76   0
   0   7  -1   19.65   11.07   0
   0   9   8   -3.91    6.61   0
   0  10   7    2.87    4.74   0
   0  11   6    0.86    4.87   0
   0  12   3    1.35    7.53   0
   0  12   4  129.53    8.09   0
   0  12   5   -3.55    6.95   0
 -12 -21  -6    2.96   11.48   0
 -12 -17 -10   -0.78    9.72   0
 -12 -14 -12   -6.30    9.62   0
 -12 -12 -13   15.76   11.12   0
 -12 -10 -14    2.03    7.80   0
 -12  -7 -15  -14.49   10.00   0
 -11 -21  -5   18.56    9.80   0
 -11 -16 -10   45.40   10.33   0
 -11 -13 -12   -2.40    8.91   0
 -11 -11 -13   -0.14    9.18   0
 -11  -5 -15   -6.04   10.10   0
 -11   0 -16    3.17    8.63   0
 -10 -23   1   15.40    8.40   0
 -10 -23   7    5.45   10.54   0
 -10 -22  -2   -6.99    8.35   0
 -10 -21  -4    0.24    6.13   0
 -10  -7 -14   13.30    6.76   0
 -10  -3 -15  -15.64    7.72   0
  -9 -22   1    0.72    7.96   0
  -9 -21  -2    9.51    8.00   0
  -9 -21  10    7.63   11.31   0
  -9 -20  -4   -2.69    5.96   0
  -9 -15  -9  129.29    8.64   0
  -9 -10 -12    6.11    7.96   0
  -9  -4 -14   26.31    8.13   0
  -9   1 -15    7.00    6.68   0
  -9   2 -15    4.50    8.54   0
  -9   3 -15   27.47    8.99   0
  -9   7 -15  110.32    9.78   0
  -9   8 -15   27.40    9.53   0
  -9  14 -14   13.87   11.86   0
  -8 -21   1   22.44    8.04   0
  -8 -21   7   -0.46    9.14   0
  -8 -20  -2   24.15    7.20   0
  -8 -20  10   10.42    9.85   0
  -8 -18  13   60.78   16.70   0
  -8 -17  -6   21.21    8.45   0
  -8 -16  -7   27.01    8.45   0
  -8 -15  -8   20.65    8.87   0
  -8 -12 -10   29.60    7.84   0
  -8  -8 -12   27.14    8.73   0
  -8  -5 -13    9.24    7.67   0
  -8  -1 -14    2.36    5.22   0
  -8   0 -14    9.09    7.20   0
  -8  10 -14    7.54    9.98   0
  -7 -20   2   56.16    9.24   0
  -7 -20   6   70.59    9.06   0
  -7 -18  -3   24.27    7.36   0
  -7  -8 -11    2.89    6.55   0
  -7  -1 -13    4.48    7.14   0
  -7  11 -13    0.90    9.97   0
  -6 -16  -4    4.62    5.24   0
  -6 -15  -5   24.76    7.00   0
  -6 -14  -6    1.89    7.67   0
  -6 -13  -7  286.90    7.05   0
  -6 -10  -9   -3.95    5.88   0
  -6  -8 -10    9.76    7.16   0
  -6  -6  19   10.33   10.91   0
  -6  -2 -12   11.18    5.11   0
  -6  20  -9   23.92   15.94   0
  -6  23  -7   70.18   12.44   0
  -6  26  -4   38.56   10.85   0
  -5 -15  -3  351.58    7.50   0
  -5 -14  -4    8.35    6.89   0
  -5 -12  -6  131.20    7.71   0
  -5 -11  -7  416.52    7.38   0
  -5  -5 -10   -7.63    5.18   0
  -5  -2  19   62.05    9.43   0
  -5  -1 -11   21.17    7.36   0
  -5  25  -3  133.40   10.56   0
  -5  27   1   39.25    9.12   0
  -5  27   7   13.83    9.84   0
  -4 -15   1    2.54    7.04   0
  -4 -15   7   36.91    9.37   0
  -4 -13  -3    3.44    5.11   0
  -4 -12  -4    0.64    6.43   0
  -4 -11  -5   42.67    5.03   0
  -4 -10  14  313.24   14.07   0
  -4  -8  -7    4.13    6.63   0
  -4  -6  -8  208.02    7.92   0
  -4   1 -10    2.51    6.85   0
  -4   9 -10    6.84    8.02   0
  -4   9  18    9.53    7.28   0
  -4  14  17   19.66   10.14   0
  -4  16  16  -10.78    7.13   0
  -4  18  15  -24.02    8.39   0
  -4  20  14   11.28    8.40   0
  -4  21  -5   70.90   10.51   0
  -4  21  13  -13.00   10.63   0
  -4  23  -3   27.64    8.58   0
  -4  23  11    0.17   10.08   0
  -4  24   9   -3.44    7.58   0
  -4  25   1    4.39    9.01   0
  -4  25   7   -5.87    9.26   0
  -3 -12  -1   73.03    5.86   0
  -3  -8  -5   27.41    7.25   0
  -3  -5  15   -5.13    8.62   0
  -3   3  17   36.58    7.25   0
  -3   4  17    9.63    7.04   0
  -3   5  17   -2.82    7.83   0
  -3   6  17    6.52    7.82   0
  -3   7  17   -5.45    7.84   0
  -3  15  15   21.64    7.31   0
  -3  17  14   38.23    8.20   0
  -3  18  13   -2.95    6.44   0
  -3  22  -1   28.27    7.38   0
  -3  22   9   40.27    8.96   0
  -3  23   1   11.60    7.06   0
  -3  23   6    0.95    6.28   0
  -3  23   7    9.40    8.09   0
  -2  -9  -1 1520.48   16.79   0
  -2  -6  -4    1.96    6.78   0
  -2  -4  -5    2.62    8.85   0
  -2  -2  14    2.77    6.61   0
  -2   2  15   -2.82    7.78   0
  -2   4  -7    4.57    7.90   0
  -2   4  15   -1.59    5.43   0
  -2   5  -7  639.03   15.89   0
  -2   5  15  299.94    7.70   0
  -2   6  15    4.23    5.41   0
  -2   7  15   -1.30    8.73   0
  -2   8  15   -2.00    8.58   0
  -2  12  14    8.09    8.07   0
  -2  14  13   -2.16    5.59   0
  -2  16  -4    6.55    7.85   0
  -2  18  10   -1.25    6.39   0
  -2  19  -1  313.50    9.92   0
  -2  19   9  189.68    7.42   0
  -2  20   7   -1.72    5.93   0
  -2  20   8   27.88    7.63   0
  -2  21   4    1.55    6.36   0
  -1  -4  -2  173.91   12.72   0
  -1   0  -4   -4.18   10.86   0
  -1   0  12   -0.04    5.28   0
  -1  10  12  252.39    6.81   0
  -1  13  11   75.40    6.87   0
  -1  14  -2   18.40    6.94   0
  -1  14  10    4.62    4.97   0
  -1  15   9   53.34    5.59   0
  -1  16   0   -1.66    6.84   0
  -1  16   8   10.89    5.05   0
  -1  17   2   27.35    5.37   0
  -1  17   7   27.00    6.68   0
   0   0   8 3428.14   23.66   0
   0   2   9    6.85    7.61   0
   0   7   9   50.56    5.20   0
   0   8   9   -5.09    6.67   0
   0  10   0 3576.38   25.46   0
   0  10   8  790.57   10.64   0
   0  11   1  128.92    6.68   0
   0  11   7   84.72    5.36   0
   0  12   2  145.71    8.13   0
   0  12   6    8.28    6.80   0
 -12 -20  -7   45.76    8.12   0
 -12 -19  -8    3.35    7.85   0
 -12 -18  -9   68.62    8.64   0
 -12 -15 -11   17.35    9.91   0
 -12  -9 -14  -21.67   11.16   0
 -12  -6 -15    1.47   11.44   0
 -11 -23  -1   19.59    7.24   0
 -11 -22  -3   10.20    8.91   0
 -11 -20  -6   24.36    8.96   0
 -11 -19  -7   -2.53    9.87   0
 -11 -17  -9    8.42    7.23   0
 -11 -14 -11   -1.25    9.58   0
 -11  -8 -14  105.77    7.84   0
 -11  -4 -15  -11.60    9.64   0
 -11   1 -16    0.89    7.56   0
 -11   2 -16   44.56   10.35   0
 -11   3 -16   20.51    9.89   0
 -10 -23   2   78.68    9.29   0
 -10 -23   3    4.99    9.95   0
 -10 -23   6  120.19   11.27   0
 -10 -22  -1    4.98    8.67   0
 -10 -20  -5   28.22    6.63   0
 -10 -19  -6  198.82    9.03   0
 -10 -18  -7    0.27    8.44   0
 -10 -17  -8   36.61    8.41   0
 -10 -16  -9   55.49    6.38   0
 -10 -13 -11   43.74    8.04   0
 -10 -11 -12   29.34    8.71   0
 -10  -9 -13    5.25    6.21   0
 -10  -6 -14   -0.43    7.69   0
 -10  -2 -15   -0.10    6.35   0
 -10  12 -15    0.72   10.77   0
  -9 -22   2    6.52    8.06   0
  -9 -22   7    2.88    7.96   0
  -9 -19  -5    8.41    5.75   0
  -9 -18  -6    6.26    6.88   0
  -9 -17  -7  227.93    8.72   0
  -9 -16  -8   -0.38    7.05   0
  -9  -7 -13  278.07    8.79   0
  -9  -3 -14   21.12    7.78   0
  -9   4 -15    1.57    8.08   0
  -9   5 -15    9.27    7.35   0
  -9   6 -15   43.32    8.67   0
  -8 -21   2   26.10    7.79   0
  -8 -21   6   25.38    9.07   0
  -8 -20  -1  121.73    7.88   0
  -8 -19  -3   10.04    7.46   0
  -8 -10 -11  257.23    7.62   0
  -8   1 -14  -13.00    7.56   0
  -8   9 -14   -2.51   10.13   0
  -7 -20   3   21.54    7.27   0
  -7 -20   5   -0.69    7.23   0
  -7 -19  -1   19.05    5.65   0
  -7 -19   9   35.98   10.34   0
  -7 -17  -4  166.59    7.46   0
  -7 -13  -8   49.11    7.17   0
  -7 -10 -10    8.82    4.99   0
  -7  -5 -12    2.18    4.82   0
  -7   0 -13    0.87    7.16   0
  -7  15 -12   44.68   13.54   0
  -7  26  -6  108.63   13.02   0
  -6 -18   0    1.02    4.43   0
  -6 -18   8   13.06    8.88   0
  -6 -17  -2   44.31    6.74   0
  -6 -12  16   11.78   10.77   0
  -6 -11  -8  114.77    8.27   0
  -6  -5 -11  125.28    6.31   0
  -6  -1 -12   -0.13    4.72   0
  -6  11 -12    6.24    9.19   0
  -6  15 -11   90.63   13.19   0
  -6  28  -1   20.35   11.02   0
  -5 -17   2   19.96    7.11   0
  -5 -17   6    8.39    6.64   0
  -5 -16  -1  120.47    6.17   0
  -5 -16   9  142.10   12.04   0
  -5 -13  -5   96.59    5.45   0
  -5  -9  -8    5.70    4.91   0
  -5  -8  17   76.65   10.15   0
  -5  -7  -9  571.20    8.51   0
  -5  -4 -10    7.78    6.93   0
  -5   0 -11    7.60    6.92   0
  -5   4  20    4.65    9.76   0
  -5  10 -11    6.44    9.01   0
  -5  21  -7  123.65   11.95   0
  -4 -14  -1   94.57    6.97   0
  -4  -7  16    3.12    8.09   0
  -4  -3  -9    2.60    6.59   0
  -4  -1  18   -3.56    8.65   0
  -4   2 -10   58.97    7.35   0
  -4   8 -10   69.57    8.93   0
  -4  11  18    3.45    7.38   0
  -4  12  18   14.75    8.33   0
  -4  15  17   -3.18    9.78   0
  -4  17  16    1.95    7.09   0
  -4  19  15    0.03    9.92   0
  -4  24  -2  175.99    9.93   0
  -4  24  10  102.18    7.89   0
  -4  25   0   -8.11    8.46   0
  -4  25   8    4.59    7.44   0
  -4  26   4    4.60    7.67   0
  -4  26   5   32.86    8.16   0
  -3 -13   6  248.91   12.14   0
  -3 -11  -2  453.49    9.93   0
  -3 -10  -3   63.39    7.14   0
  -3  -9  -4   93.51    7.70   0
  -3  -7  14  110.94    8.40   0
  -3  -6  -6  739.42   11.18   0
  -3  -4  -7   73.38    7.39   0
  -3  -1  -8    1.48    6.76   0
  -3   1  17   29.02    7.43   0
  -3   2  17   52.66    8.38   0
  -3   8  17    7.13    6.30   0
  -3   9  17    4.68    8.77   0
  -3  13  16   66.93    9.30   0
  -3  19  13   45.47    9.02   0
  -3  20  12   67.68    9.34   0
  -3  21  11   15.04    9.13   0
  -3  22  10   24.98    8.58   0
  -3  23   8   22.22    8.60   0
  -2  -8  -2   25.23    8.95   0
  -2  -7  -3   46.99    7.21   0
  -2  -1  -6  418.08   11.45   0
  -2   1  15  516.89   10.92   0
  -2   9  15  308.58    7.41   0
  -2  10  15   15.05    7.38   0
  -2  13  14   -3.79    7.39   0
  -2  15  13  186.20    6.84   0
  -2  17  12   16.34    7.00   0
  -2  18  11   26.03    7.53   0
  -2  19  10  113.72    7.94   0
  -2  20   0   -2.05    6.80   0
  -2  21   2   20.85    6.93   0
  -2  21   3   18.64    5.78   0
  -2  21   5   34.45    5.77   0
  -2  21   6   21.54    8.12   0
  -1  -7   7  102.97   14.35   0
  -1  -6   0    5.93    9.91   0
  -1  -5  -1   99.39   12.04   0
  -1  -3  11  160.24    8.16   0
  -1  -1  12   60.33    8.13   0
  -1   2  13  170.71    8.53   0
  -1   3  13  277.43    9.79   0
  -1   4  13  134.83    6.41   0
  -1   5  13   -4.07    5.19   0
  -1   6  13   45.03    5.52   0
  -1   7  13  123.03    6.04   0
  -1   8  13   77.54    7.38   0
  -1  11  12  305.17    6.93   0
  -1  12  12  225.28    7.34   0
  -1  15  10   10.02    7.21   0
  -1  16   9  141.87    7.38   0
  -1  17   1   46.73    5.64   0
  -1  17   8   32.71    6.37   0
  -1  18   3   85.31    7.75   0
  -1  18   4    2.37    7.41   0
  -1  18   5   41.52    7.82   0
   0   1   9   76.99    8.28   0
   0   5  10   10.34    6.28   0
   0   6  10   40.08    6.66   0
   0   8  -1   -1.30    9.28   0
   0   9   9    2.78    4.74   0
   0  10   9    3.00    6.53   0
   0  11   8    7.88    6.67   0
   0  12   1    2.64    7.11   0
   0  12   7   -3.49    4.81   0
   0  13   3   27.18    7.36   0
   0  13   4    3.44    4.88   0
   0  13   5   37.83    4.99   0
   0  13   6   -1.32    6.71   0
 -12 -21  -5   -8.53   10.93   0
 -12 -16 -10    9.66    9.47   0
 -12 -13 -12    0.18    7.32   0
 -12 -11 -13    7.23    9.02   0
 -12  -5 -15   -1.87   10.96   0
 -11 -23   0    7.65    8.78   0
 -11 -21  -4   -6.01    9.91   0
 -11 -15 -10  108.48    9.04   0
 -11 -12 -12   89.99    7.21   0
 -11 -10 -13   17.77    7.24   0
 -11  -7 -14   46.12   10.31   0
 -11  -3 -15   11.68    9.68   0
 -11   4 -16   -6.62    9.32   0
 -11   5 -16   17.08    9.78   0
 -11   6 -16   41.51   10.40   0
 -11   7 -16   23.09   10.37   0
 -10 -23   4   68.05    8.24   0
 -10 -21  -3   -0.12    6.20   0
 -10 -14 -10   18.20    8.16   0
 -10  -8 -13   -0.13    8.19   0
 -10  -5 -14  223.12    9.69   0
 -10  -1 -15   -4.13    6.88   0
 -10   0 -15    0.80    8.78   0
 -10  11 -15    3.16   10.80   0
  -9 -22   3    5.91    7.99   0
  -9 -22   4   23.66    8.62   0
  -9 -22   6   10.48    8.26   0
  -9 -21  -1   90.27    6.82   0
  -9 -20  -3   39.29    5.82   0
  -9 -13 -10    6.57    5.91   0
  -9 -11 -11  153.11    7.90   0
  -9  -9 -12  -10.08    5.54   0
  -9  -6 -13  147.56    8.63   0
  -9  17 -13  103.29   15.60   0
  -8 -21   3    9.55    7.09   0
  -8 -18  -4   70.29    8.71   0
  -8 -13  -9   92.60    6.24   0
  -8 -11 -10   40.05    7.54   0
  -8  -9 -11   40.86    7.61   0
  -8  -7 -12    8.36    5.41   0
  -8  -4 -13  364.42    8.78   0
  -8   2 -14    1.12    6.43   0
  -8   3 -14    5.37    8.18   0
  -8   8 -14   29.40    8.36   0
  -7 -19   0    1.57    7.32   0
  -7 -18  -2   84.75    7.29   0
  -7 -18  11   16.83   10.35   0
  -7 -16  -5    0.78    6.18   0
  -7 -15  -6  224.10    7.76   0
  -7 -14  -7   15.90    4.97   0
  -7 -11  -9   11.53    6.89   0
  -7  -7 -11   28.92    6.81   0
  -7  -4 -12   19.22    6.89   0
  -7   1 -13   -0.86    7.08   0
  -7  10 -13   10.20    8.36   0
  -7  25  -7   -2.93   10.59   0
  -6 -18   1    5.82    6.73   0
  -6 -16  -3   91.89    8.00   0
  -6 -12  -7   18.45    6.97   0
  -6  -9  -9  217.72    7.77   0
  -6  -7 -10   31.74    6.01   0
  -6  -4 -11   -5.18    7.77   0
  -6   0 -12   14.39    4.86   0
  -6  27  -3   55.44    9.66   0
  -5 -17   4   43.00    6.95   0
  -5 -17   5  284.30    9.22   0
  -5 -16   0   21.59    7.02   0
  -5 -15  -2   28.45    7.36   0
  -5 -10  -7   60.73    7.27   0
  -5 -10  16   49.92   11.32   0
  -5  -6  18    2.42    8.38   0
  -5  -3  19   47.72   10.66   0
  -5   1 -11   22.90    7.26   0
  -5   1  20    0.79    9.90   0
  -5   2  20    8.59   10.93   0
  -5   3  20  -12.29    7.99   0
  -5  26  -2    2.08    8.91   0
  -5  27   0   47.66    9.79   0
  -5  28   3    7.62    9.38   0
  -5  28   4   78.18   11.26   0
  -4 -15   2   24.49    6.05   0
  -4 -15   6   11.96    7.61   0
  -4 -13  -2   15.30    6.57   0
  -4  -9  -6   52.10    5.16   0
  -4  -5  -8   11.67    6.78   0
  -4  -5  17    6.94    8.11   0
  -4  -2  18   39.41    8.76   0
  -4   3 -10    5.98    6.83   0
  -4   4 -10  150.57    8.71   0
  -4   4  19   64.19    9.14   0
  -4   5  19    6.07    9.80   0
  -4   6  19   15.05   10.36   0
  -4   7 -10    3.43    7.87   0
  -4   7  19    0.33    9.10   0
  -4  13  18   -6.70   10.74   0
  -4  16  17    8.75   10.69   0
  -4  18  16  162.04   11.61   0
  -4  20  -6   39.11    9.87   0
  -4  21  14   15.93   10.35   0
  -4  22  13   -0.31    7.95   0
  -4  23  12   12.24    7.34   0
  -4  24  11   14.21   10.24   0
  -4  25   9   17.62    7.24   0
  -4  26   2    0.10    8.90   0
  -4  26   3   31.96    6.63   0
  -4  26   6    0.72    7.16   0
  -4  26   7   16.28    9.02   0
  -3 -12   0  441.05   10.47   0
  -3  -3  16  111.02    9.01   0
  -3   0  -8    0.41    7.01   0
  -3   0  17    0.83    7.57   0
  -3  10  17   -0.13    6.75   0
  -3  11  -8  321.27   19.63   0
  -3  11  17   65.09    8.08   0
  -3  14  16   -1.07    8.66   0
  -3  16  15    5.75    6.53   0
  -3  18  14    3.54    6.16   0
  -3  21  -3   50.13    8.57   0
  -3  23   0   32.63    8.10   0
  -3  23   9   10.17    9.17   0
  -3  24   2   94.24    7.79   0
  -3  24   3   23.92    7.74   0
  -3  24   4  108.70    6.45   0
  -3  24   5    5.32    6.30   0
  -3  24   6   73.92    8.79   0
  -3  24   7   38.72    7.72   0
  -2  -5  13  368.69   10.21   0
  -2  -3  14    8.47    6.51   0
  -2   0  15   -2.88    7.79   0
  -2  11  15  118.82    8.33   0
  -2  12  -6  102.61   15.09   0
  -2  14  14    9.09    7.81   0
  -2  16  13   11.80    8.18   0
  -2  19  -2   37.45    8.55   0
  -2  20   9    8.73    5.45   0
  -2  21   1   44.86    6.57   0
  -2  21   7   29.12    6.16   0
  -1  -7   2  245.73   13.00   0
  -1  -2  -3    1.99   11.20   0
  -1   1  13   66.06    8.34   0
  -1   9  13   16.23    5.09   0
  -1  10  13   55.51    6.98   0
  -1  13  -3  161.22    9.06   0
  -1  13  12  121.96    6.86   0
  -1  14  11   45.65    4.80   0
  -1  16  -1   90.13    7.60   0
  -1  16  10   54.25    6.13   0
  -1  17   0   13.37    6.49   0
  -1  17   9  190.83    7.09   0
  -1  18   2   52.20    7.41   0
  -1  18   6   43.68    5.49   0
  -1  18   7   84.41    7.24   0
   0  -2   7    0.54    8.03   0
   0  -1   8    3.08    7.27   0
   0   0   9   -1.34    7.14   0
   0   3  10   -3.57    6.55   0
   0   4  10 1663.05   13.57   0
   0   7  10    2.57    4.79   0
   0   8  10  768.77   10.81   0
   0   9  -1   22.78    9.50   0
   0  11   0    6.84    7.11   0
   0  11   9   84.60    7.26   0
   0  12   8   15.06    6.89   0
   0  13   2   -6.15    7.46   0
   0  13   7   13.65    6.99   0
   0  14   4  677.90   10.26   0
   0  14   5   -7.15    6.80   0
 -12 -22  -3   56.61   10.88   0
 -12 -20  -6   12.59    8.60   0
 -12 -19  -7   11.67    9.41   0
 -12 -18  -8   16.57    9.14   0
 -12 -17  -9    9.12    6.78   0
 -12 -14 -11  146.02   10.43   0
 -12  -8 -14    9.70    7.14   0
 -11 -23   1   24.80    8.89   0
 -11 -22  -2   54.93    7.62   0
 -11 -20  -5   58.98    9.17   0
 -11 -16  -9  -13.14    8.29   0
 -11 -13 -11   90.10    8.85   0
 -11  -9 -13   -5.22    8.40   0
 -11  -6 -14   61.57    9.31   0
 -10 -22   0   30.91    7.87   0
 -10 -21  -2    9.81    8.94   0
 -10 -20  -4    2.78    6.05   0
 -10 -15  -9    5.15    8.48   0
 -10 -12 -11   20.29    7.85   0
 -10 -10 -12   12.74    7.95   0
 -10  -4 -14   20.09    8.94   0
 -10   1 -15   -8.59    9.02   0
 -10  10 -15    9.13   11.69   0
  -9 -21   0   16.49    8.96   0
  -9 -19  -4   33.50    7.28   0
  -9 -15  -8    4.91    7.37   0
  -9 -14  -9   24.69    5.81   0
  -9  -2 -14   20.79    5.87   0
  -9  13 -14    3.03   11.68   0
  -8 -20   0   20.28    7.52   0
  -8 -20   9  105.11   10.03   0
  -8 -19  -2   11.26    7.89   0
  -8 -17  -5   28.63    8.28   0
  -8 -16  -6   -0.59    7.49   0
  -8 -15  -7   10.07    7.32   0
  -8 -14  -8  119.67    6.24   0
  -8  -6 -12  125.71    8.19   0
  -8  -3 -13   -5.64    7.78   0
  -8   4 -14  123.39    8.13   0
  -8   5 -14   19.29    7.71   0
  -8   6 -14  101.71    8.76   0
  -8   7 -14   12.09    7.15   0
  -8  14 -13  133.07   13.64   0
  -7  -9 -10   42.99    5.12   0
  -7   2 -13   -5.44    7.01   0
  -7   3 -13   20.44    7.46   0
  -7   9 -13   14.45    8.86   0
  -6 -18   2   23.93    6.96   0
  -6 -18   7   17.47    8.44   0
  -6 -17  -1   18.78    6.95   0
  -6 -17  10   42.15    9.93   0
  -6 -15  -4  179.29    8.36   0
  -6 -14  -5   26.77    6.72   0
  -6 -13  -6  204.78    7.85   0
  -6  -9  18   14.19    9.02   0
  -6  -7  19    1.94    9.59   0
  -6   1 -12   -0.38    5.31   0
  -6   2 -12    8.27    6.72   0
  -6  10 -12    6.35    7.93   0
  -6  28  -2    3.73   10.73   0
  -5 -14  -3   15.48    7.30   0
  -5 -11  -6   96.38    7.47   0
  -5  -8  -8   44.64    5.37   0
  -5  -6  -9  276.08    6.79   0
  -5  -4  19    3.97    8.80   0
  -5  -3 -10   19.21    6.75   0
  -5   0  20  -15.49   10.03   0
  -5   2 -11   45.58    7.33   0
  -5   9 -11   32.17    8.36   0
  -5  27  -1   35.31    8.95   0
  -5  28   2   18.41   10.11   0
  -4 -15   4   20.62    8.08   0
  -4 -15   5   23.37    7.44   0
  -4 -14   0  401.57    9.38   0
  -4 -12  -3   43.20    6.89   0
  -4 -11  -4   11.41    7.01   0
  -4 -10  -5  158.04    6.20   0
  -4  -9  15   15.02    8.02   0
  -4  -7  -7   20.60    5.21   0
  -4  -3  18    5.30    9.97   0
  -4  -2  -9    4.66    4.72   0
  -4   2  19   16.46   10.34   0
  -4   3  19    9.72    7.47   0
  -4   5 -10   20.10    7.34   0
  -4   6 -10  116.76    8.33   0
  -4   8  19   13.11    6.84   0
  -4   9  19   31.89    9.65   0
  -4  10  19   16.58    9.85   0
  -4  14  18  155.07   12.02   0
  -4  25  -1   34.84    8.72   0
  -4  25  10   19.30    7.88   0
  -4  26   1   28.28    9.20   0
  -4  26   8  -10.17    9.66   0
  -3 -13   4  147.79    7.91   0
  -3 -13   5   64.06    8.03   0
  -3  -7  -5   55.49    7.71   0
  -3  -6  15    0.38    8.22   0
  -3  -4  16    0.84    8.38   0
  -3  -3  -7   37.12    7.47   0
  -3  -1  17   21.35    7.51   0
  -3  12  17   49.00    8.61   0
  -3  15  16    6.18    6.86   0
  -3  17  -6   75.67    9.31   0
  -3  17  15   -1.20    7.22   0
  -3  19  14    8.57   10.14   0
  -3  20  -4   97.40    7.75   0
  -3  20  13    4.89    6.69   0
  -3  21  12   29.73    6.67   0
  -3  22  -2   87.65    8.56   0
  -3  22  11   35.76    6.55   0
  -3  23  10    4.34    8.49   0
  -3  24   1    5.45    7.43   0
  -3  24   8   57.77    9.24   0
  -2  -5  -4   29.95    9.79   0
  -2  -3  -5  114.90   10.20   0
  -2  -1  15  548.43   11.16   0
  -2   3  16   18.35    7.87   0
  -2   4  16    6.56    7.83   0
  -2   5  16   21.09    7.65   0
  -2   6  16    2.60    7.66   0
  -2   7  16   27.60    7.58   0
  -2   8  16    2.01    7.92   0
  -2  12  15    4.10    5.80   0
  -2  13  15  160.58    7.74   0
  -2  15  14    2.04    7.70   0
  -2  17  13   49.65    8.02   0
  -2  18  -3   45.08    8.37   0
  -2  18  12   11.54    5.30   0
  -2  19  11  137.61    6.52   0
  -2  20  -1   22.38    6.67   0
  -2  20  10   14.75    5.86   0
  -2  21   9    6.49    7.27   0
  -2  22   3    4.43    8.12   0
  -2  22   4   36.36    8.92   0
  -2  22   5   11.32    7.64   0
  -2  22   6   59.25    7.39   0
  -1  -6   9  265.32   11.41   0
  -1  -5  10   -0.51    6.27   0
  -1  -4  11   40.07    8.09   0
  -1  -2  12  192.14    8.81   0
  -1   0  13   -6.93    7.35   0
  -1   1  -4  163.43   12.72   0
  -1   5  14    6.70    6.48   0
  -1   6  14   54.88    6.71   0
  -1  11  13  102.17    6.10   0
  -1  14  12   14.41    6.56   0
  -1  15  -2    4.87    6.92   0
  -1  15  11   79.27    6.34   0
  -1  18   1   94.10    7.67   0
  -1  18   8   86.18    6.93   0
  -1  19   4    2.99    6.99   0
  -1  19   5   19.94    6.79   0
  -1  19   6   17.55    6.43   0
   0  -3   4    2.14   13.74   0
   0  -3   5   14.63   12.62   0
   0   2  10  244.75    7.20   0
   0   9  10    0.90    4.84   0
   0  10  10  297.08    8.19   0
   0  12   9    1.64    7.10   0
   0  13   1   81.69    8.03   0
   0  13   8    4.88    6.73   0
   0  14   3    5.59    4.70   0
   0  14   6  308.92    6.97   0
   0  14   7   -6.19    6.72   0
 -12 -21  -4   26.31    9.63   0
 -12 -15 -10    2.73    9.33   0
 -12 -12 -12   13.75    7.57   0
 -12 -10 -13  101.60    7.72   0
 -12  -7 -14    1.86    9.26   0
 -12  -4 -15   79.11    7.85   0
 -11 -23   2   25.51    8.75   0
 -11 -22  -1   10.04    9.86   0
 -11 -21  -3   39.95    9.93   0
 -11 -19  -6   -5.78    6.61   0
 -11 -18  -7   -1.07    6.14   0
 -11 -17  -8   51.54    6.52   0
 -11 -11 -12   32.00    6.48   0
 -11  -2 -15   74.30    7.83   0
 -11  -1 -15   10.97   10.04   0
 -10 -22   1    8.21    7.22   0
 -10 -19  -5   46.48    6.19   0
 -10 -18  -6   49.87    7.39   0
 -10 -17  -7   14.60    7.88   0
 -10 -16  -8    3.14    6.19   0
 -10 -13 -10  217.32    9.34   0
 -10  -7 -13   20.23    7.77   0
 -10   2 -15   -5.14    7.72   0
 -10   3 -15    6.91    8.82   0
 -10   9 -15   17.06   10.18   0
  -9 -21   1   92.93    8.72   0
  -9 -20  -2    0.12    5.62   0
  -9 -18  -5   68.54    5.68   0
  -9 -17  -6    0.86    5.71   0
  -9 -16  -7  221.04    6.69   0
  -9 -12 -10   -1.25    5.45   0
  -9 -10 -11   -3.06    6.81   0
  -9  -8 -12   25.59    5.43   0
  -9  -5 -13   45.95    6.08   0
  -9  -1 -14   19.04    5.56   0
  -9   0 -14   13.12    7.52   0
  -8 -20   1  114.98    8.02   0
  -8 -12  -9  100.19    5.54   0
  -8 -10 -10  165.01    8.25   0
  -8  -8 -11  102.40    7.74   0
  -8  -2 -13    7.49    7.34   0
  -7 -19   1   24.20    5.85   0
  -7 -19   8    4.27    7.53   0
  -7 -18  -1   25.55    6.67   0
  -7 -17  -3   29.43    4.98   0
  -7 -14  16    2.84   17.53   0
  -7 -13  -7   62.26    6.77   0
  -7 -12  -8  171.48    6.10   0
  -7 -10  -9    5.64    6.52   0
  -7  -6 -11   44.74    5.14   0
  -7  -3 -12   97.75    5.74   0
  -7   4 -13   18.65    7.69   0
  -7   5 -13    8.00    7.51   0
  -7   6 -13   24.17    8.06   0
  -7   7 -13   20.92    8.95   0
  -7   8 -13   25.25    8.80   0
  -7  24  -8   24.54   13.19   0
  -6 -18   3   -1.18    6.38   0
  -6 -11  17   -2.16   12.16   0
  -6 -10  -8   11.48    5.21   0
  -6  -8  -9   -3.52    6.93   0
  -6  -6 -10    0.83    5.26   0
  -6  -3 -11   20.35    5.93   0
  -6   3 -12   69.06    7.52   0
  -6   9 -12  137.17    9.22   0
  -6  22  -8   24.56   11.60   0
  -5 -16   1  134.68    8.04   0
  -5 -13  -4  202.49    6.52   0
  -5 -12  -5  442.59    7.80   0
  -5  -2 -10   12.76    7.39   0
  -5  -1  20    7.43   10.24   0
  -5   3 -11   95.02    7.50   0
  -5   4 -11   14.96    7.16   0
  -5   8 -11  110.43    9.68   0
  -5  24  -5   20.39    7.55   0
  -5  25  -4   12.09    8.67   0
  -5  26  -3   55.37   10.37   0
  -5  28   1    0.12    6.99   0
  -4 -14   9   56.64   10.71   0
  -4  -1  -9    2.92    7.02   0
  -4   0  19   11.62    8.96   0
  -4   1  19    3.64    7.27   0
  -4  11  19    0.73    8.06   0
  -4  13  -9   14.92   14.01   0
  -4  23  -4    6.17    8.75   0
  -4  24  -3    1.56    8.65   0
  -4  26   0   19.06    8.34   0
  -4  26   9   17.33    8.29   0
  -4  27   3   35.41    9.06   0
  -4  27   4   10.56    9.98   0
  -4  27   5   42.60   10.38   0
  -4  27   6    1.69    9.35   0
  -3 -11  -1  315.66    9.38   0
  -3 -10  12    5.88    9.64   0
  -3  -9  13   33.17    8.87   0
  -3  -5  -6   73.39    7.88   0
  -3   1  -8    0.05    6.75   0
  -3   3  18   48.78    8.39   0
  -3   4  18   48.24    9.02   0
  -3   5  18   -5.74    8.55   0
  -3   6  18  124.30    7.39   0
  -3   7  18  130.57    9.48   0
  -3   8  18   80.75    8.97   0
  -3   9  18    8.77    8.09   0
  -3  13  17    0.10    7.60   0
  -3  14  17    8.53    9.19   0
  -3  16  16  120.19    7.87   0
  -3  18  15    1.83    7.21   0
  -3  19  -5   92.72    9.05   0
  -3  21  13   20.91    9.63   0
  -3  22  12   21.31   10.17   0
  -3  23  -1   11.08    8.00   0
  -3  23  11   27.01    8.86   0
  -3  24   9    7.03    9.06   0
  -3  25   3   -0.42    7.87   0
  -3  25   4   38.02    8.89   0
  -3  25   5   29.54    8.93   0
  -3  25   6   18.97    8.38   0
  -2  -9   0   44.36    8.05   0
  -2  -8  11   -0.58    7.54   0
  -2  -7  12   58.65    9.23   0
  -2  -4  14    5.47    6.99   0
  -2  -2  15    9.43    7.21   0
  -2   0  -6   52.34    8.65   0
  -2   2  16    5.07    8.74   0
  -2   9  16   23.21    6.24   0
  -2  10  16   13.78    8.11   0
  -2  14  15   10.46    8.40   0
  -2  15  -5  384.80   13.22   0
  -2  16  14   10.64    8.18   0
  -2  19  12   14.16    8.38   0
  -2  20  11   -9.91    8.52   0
  -2  21   0   28.01    6.84   0
  -2  21  10   15.35    8.12   0
  -2  22   2   61.77    8.12   0
  -2  22   7   12.88    5.65   0
  -2  22   8   25.18    7.64   0
  -1   3  14   48.60    7.39   0
  -1   4  14   38.68    5.25   0
  -1   7  14   81.07    5.43   0
  -1   8  14   10.24    5.11   0
  -1   9  14   31.63    7.17   0
  -1  11  -4  208.74   12.31   0
  -1  12  13  117.43    6.39   0
  -1  13  13   79.01    7.46   0
  -1  15  12   13.59    7.19   0
  -1  16  11  104.03    8.32   0
  -1  17  10   14.81    5.63   0
  -1  18   9   50.56    7.86   0
  -1  19   2   44.56    6.91   0
  -1  19   3    0.59    4.91   0
  -1  19   7   74.38    7.18   0
   0  -3   6    2.87   10.75   0
   0  -2   8  738.80   13.76   0
   0  -1   9   68.38    8.22   0
   0   1  10    0.42    5.23   0
   0   3  11    5.20    6.39   0
   0   4  11   -2.68    7.30   0
   0   5  11    8.26    5.30   0
   0   6  11    0.30    4.98   0
   0   7  11   10.57    5.25   0
   0   8  11    2.52    6.97   0
   0   9  11    0.37    6.71   0
   0  10  -1   -0.69    8.19   0
   0  11  10   -1.85    5.37   0
   0  12   0   24.32    7.35   0
   0  13   9   66.80    7.19   0
   0  14   2 1078.06   11.63   0
   0  14   8  571.11    9.78   0
   0  15   3   35.79    6.71   0
   0  15   4    8.78    6.58   0
   0  15   5   30.73    5.29   0
   0  15   6    2.25    6.69   0
 -13 -14 -11   16.06    8.74   0
 -13 -12 -12   39.77   11.34   0
 -13 -10 -13    7.97   11.75   0
 -12 -22  -2    9.52    9.59   0
 -12 -20  -5   64.32    9.10   0
 -12 -16  -9    7.78    8.58   0
 -12 -13 -11   -0.43    9.65   0
 -12  -9 -13   14.18    9.92   0
 -12  -3 -15   14.32    7.17   0
 -11 -23   3   11.96    8.09   0
 -11 -23   4   -0.88    9.57   0
 -11 -20  -4   59.18    8.99   0
 -11 -15  -9   22.98    8.99   0
 -11 -14 -10   -6.04    6.65   0
 -11 -12 -11  153.66    9.63   0
 -11 -10 -12   20.36    9.32   0
 -11  -8 -13   22.44    6.19   0
 -11  -5 -14   15.17    6.46   0
 -11   0 -15   -0.66   10.23   0
 -10 -22   2   18.93    7.76   0
 -10 -22   8    3.44    9.12   0
 -10 -21  -1   12.32    7.76   0
 -10 -20  -3   45.43    6.85   0
 -10 -11 -11    6.43    5.95   0
 -10  -9 -12  183.85    7.40   0
 -10  -6 -13  -17.97    8.68   0
 -10  -3 -14   96.02    6.90   0
 -10   4 -15   10.93    7.91   0
 -10   5 -15  105.18    8.57   0
 -10   6 -15   12.86    9.04   0
 -10   7 -15   23.49    9.70   0
 -10   8 -15   -1.10    9.01   0
 -10  15 -14   83.36   13.26   0
  -9 -21   2   21.32    8.54   0
  -9 -21   8   26.63   10.28   0
  -9 -20  -1    8.48    7.71   0
  -9 -20  11   17.08   10.54   0
  -9 -19  -3   10.50    7.01   0
  -9 -13  -9  126.85    6.45   0
  -9  -7 -12   13.59    7.85   0
  -9  -4 -13  -13.02    8.19   0
  -9   1 -14   25.73    7.92   0
  -9  12 -14    7.47    9.18   0
  -8 -20   2   26.96    7.85   0
  -8 -20   8   12.92    8.52   0
  -8 -19  -1    9.83    8.50   0
  -8 -19  11    0.16    9.28   0
  -8 -18  -3  222.50    7.00   0
  -8 -13  -8    5.21    7.30   0
  -8  -5 -12   20.48    7.16   0
  -8  -1 -13   29.01    8.20   0
  -8  20 -11   67.59   22.84   0
  -7 -19   2    6.65    7.04   0
  -7 -16  -4  379.52    7.32   0
  -7 -15  -5   -1.88    6.56   0
  -7 -14  -6   -0.66    6.25   0
  -7  -8 -10  152.93    5.96   0
  -7  -2 -12  305.37    8.46   0
  -6 -18   5    2.87    7.47   0
  -6 -18   6   21.43    7.02   0
  -6 -17   0   48.46    6.74   0
  -6 -16  -2   61.22    5.67   0
  -6 -11  -7    3.67    6.56   0
  -6  -5 -10  252.82    8.25   0
  -6  -2 -11    6.13    7.96   0
  -6   4 -12   11.62    6.57   0
  -6   5 -12  188.47    8.50   0
  -6   6 -12    2.03    7.10   0
  -6   7 -12    7.56    7.13   0
  -6   8 -12   29.17    7.13   0
  -6  25  -6   -0.41   10.70   0
  -6  26  -5   10.83   10.12   0
  -6  27  -4  105.66   10.40   0
  -5 -15  -1   73.91    5.79   0
  -5  -9  -7   34.37    5.04   0
  -5  -9  17   14.92    9.30   0
  -5  -7  -8   -1.51    6.73   0
  -5  -7  18   22.91    8.98   0
  -5  -5  -9    8.88    4.80   0
  -5  -5  19   22.06   10.95   0
  -5  -2  20    1.35   10.02   0
  -5   5 -11    1.00    6.65   0
  -5   6 -11   94.62    9.13   0
  -5   7 -11  201.66    9.69   0
  -5  14 -10    9.83   12.32   0
  -5  23  -6   38.61    9.72   0
  -5  27  -2   34.81   11.86   0
  -5  28   0    0.63   10.23   0
  -4 -14   1   74.89    7.43   0
  -4 -13  -1   18.29    6.75   0
  -4  -8  -6  562.80    8.73   0
  -4  -8  16  142.20    9.64   0
  -4  -6  -7  200.82    8.42   0
  -4  -6  17  121.10    9.01   0
  -4  -4  -8  122.56    5.96   0
  -4  -4  18  110.22    8.98   0
  -4  -1  19    6.13    8.81   0
  -4  22  -5    8.29    8.01   0
  -4  25  -2   26.48    8.40   0
  -4  27   2    5.23    9.80   0
  -4  27   7   15.25    8.12   0
  -4  27   8   -4.73   11.28   0
  -3 -12   1   88.11    7.65   0
  -3 -10  -2   65.21    7.61   0
  -3  -9  -3    4.32    7.16   0
  -3  -8  -4  293.36    7.49   0
  -3  -8  14   67.70    8.47   0
  -3  -2  -7   86.25    8.00   0
  -3  -2  17   69.13    8.32   0
  -3   2  -8  195.90    8.97   0
  -3   2  18   64.24    9.32   0
  -3  10  18   94.56    7.85   0
  -3  11  18  101.38   10.36   0
  -3  15  -7   35.88   14.52   0
  -3  15  17    9.19    8.56   0
  -3  17  16   38.34   10.20   0
  -3  19  15   28.00    9.38   0
  -3  20  14   72.03    7.76   0
  -3  24   0   74.89    8.62   0
  -3  24  10   62.46    9.87   0
  -3  25   2   62.13    9.32   0
  -3  25   7   51.86    6.70   0
  -3  25   8   12.00   10.15   0
  -2  -8  -1   15.61    8.46   0
  -2  -7  -2  160.28   10.69   0
  -2  -6  -3   23.58    7.47   0
  -2  -6  13   -3.82    7.38   0
  -2   1  16   10.18    8.60   0
  -2  11  16   18.64    6.03   0
  -2  12  16    9.71    8.58   0
  -2  15  15  153.57    9.33   0
  -2  17  -4   29.08    6.89   0
  -2  17  14   33.74    8.61   0
  -2  18  13    7.56    5.96   0
  -2  22   1   45.57    7.46   0
  -2  22   9    6.14    8.38   0
  -2  23   4   -0.95    7.79   0
  -2  23   5  417.91    9.91   0
  -2  23   6   22.19    8.02   0
  -1  -3  -2  579.09   16.35   0
  -1  -3  12  128.12    8.27   0
  -1  -1  13   68.42    8.54   0
  -1   2  14   39.97    6.87   0
  -1  10  14  136.03    6.09   0
  -1  11  14  110.82    8.64   0
  -1  14  -3   41.70    7.24   0
  -1  14  13   28.79    8.19   0
  -1  17  -1   57.22    7.76   0
  -1  17  11  100.70    8.74   0
  -1  18   0  173.42    8.40   0
  -1  18  10   73.38    8.44   0
  -1  19   8    3.61    5.22   0
  -1  20   4   88.62    7.31   0
  -1  20   5   70.78    7.05   0
  -1  20   6   60.90    7.68   0
   0   0  10 3510.88   22.67   0
   0   2  11    0.97    7.04   0
   0  10  11   -4.96    7.30   0
   0  12  10    4.62    5.63   0
   0  14   1   -0.06    7.14   0
   0  14   9  -12.59    7.26   0
   0  15   2   -0.47    6.61   0
   0  15   7   13.12    5.36   0
   0  15   8    0.99    7.41   0
   0  16   5   -7.51    6.59   0
 -13 -15 -10   17.81    9.76   0
 -12 -22  -1   28.60   11.33   0
 -12 -21  -3   12.81    9.26   0
 -12 -19  -6   -7.07    7.22   0
 -12 -18  -7  141.09    8.02   0
 -12 -17  -8   17.98    6.86   0
 -12 -14 -10    6.19    9.60   0
 -12 -11 -12    3.55    7.40   0
 -12  -6 -14    7.31    7.80   0
 -12  -2 -15    3.03    8.82   0
 -11 -22   0   29.88    7.53   0
 -11 -21  -2   -4.26    8.50   0
 -11 -19  -5    8.24    7.60   0
 -11 -18  -6   82.23    9.04   0
 -11 -17  -7   16.41    9.14   0
 -11 -16  -8  145.33    8.99   0
 -11  -7 -13   16.34    8.73   0
 -11  -4 -14   36.02    8.76   0
 -11   1 -15   17.58   10.55   0
 -10 -22   3   -1.17    7.01   0
 -10 -22   4    6.29    9.61   0
 -10 -22   5    2.86    8.90   0
 -10 -22   7    2.04    8.29   0
 -10 -21   0    9.53    8.87   0
 -10 -19  -4  157.68    7.06   0
 -10 -18  -5   -0.01    8.28   0
 -10 -15  -8  153.84    8.24   0
 -10 -12 -10   -5.81    7.76   0
 -10  -8 -12    9.59    7.88   0
 -10  -2 -14   10.07    7.77   0
  -9 -21   3   98.27    8.84   0
  -9 -21   7   87.29   10.01   0
  -9 -18  -4    5.30    6.58   0
  -9 -17  -5  221.93    8.49   0
  -9 -15  -7  143.13    8.72   0
  -9 -14  -8   58.82    5.84   0
  -9 -11 -10   46.52    5.94   0
  -9  -9 -11   79.68    6.30   0
  -9  -3 -13  182.96    8.50   0
  -9   2 -14   19.83    8.29   0
  -9  11 -14   20.57    9.13   0
  -8 -20   3  142.41    8.43   0
  -8 -17  -4   27.96    5.24   0
  -8 -16  -5   63.16    6.76   0
  -8 -15  -6   34.45    7.08   0
  -8 -14  -7  374.07    7.77   0
  -8 -11  -9   -6.28    6.60   0
  -8  -7 -11    2.38    7.74   0
  -8  -4 -12  159.31    8.20   0
  -8   0 -13  189.60    9.40   0
  -8  13 -13   15.55   10.69   0
  -7 -19   3   99.58    7.86   0
  -7 -19   7   51.45    6.97   0
  -7 -18   0   20.35    6.60   0
  -7 -17  -2  244.16    8.37   0
  -7 -11  -8   12.86    6.42   0
  -7  -5 -11    0.88    5.15   0
  -7  -1 -12   27.42    7.16   0
  -7  14 -12    9.02    9.56   0
  -6 -15  -3  315.75    7.35   0
  -6 -14  -4    4.39    6.77   0
  -6 -13  -5  626.33    9.61   0
  -6 -12  -6   35.09    5.37   0
  -6  -9  -8   99.12    7.60   0
  -6  -8  19    1.17   11.75   0
  -6  -7  -9   -8.84    6.82   0
  -6  -1 -11  127.60    8.27   0
  -6  28  -3    5.26   11.06   0
  -5 -16   2   19.66    6.45   0
  -5 -16   8   17.09    7.18   0
  -5 -14  -2   -2.93    6.73   0
  -5 -10  -6   54.99    5.29   0
  -5  -1 -10   16.36    7.47   0
  -4 -12  -2   74.70    7.31   0
  -4  -9  -5   26.05    6.86   0
  -4   0  -9   69.13    7.45   0
  -4   4  20   45.23   10.07   0
  -4   5  20   13.35   11.24   0
  -4   6  20   48.36   11.13   0
  -4   7  20   14.63   11.45   0
  -4  19  -7   23.58   11.22   0
  -4  26  -1   10.63    8.50   0
  -4  27   1   10.03    9.62   0
  -4  28   5   67.16   10.21   0
  -3  -6  -5   73.63    8.49   0
  -3  -5  16    7.21    6.86   0
  -3  -3  17   26.86    7.22   0
  -3   1  18    5.94    6.63   0
  -3  12  18   67.62    7.88   0
  -3  13  18   51.94    8.71   0
  -3  16  17    7.72    8.91   0
  -3  18  16   10.72   10.71   0
  -3  20  15    7.25    9.70   0
  -3  21  14   21.40    7.24   0
  -3  22  -3   98.40    8.88   0
  -3  22  13   19.51    7.55   0
  -3  23  -2    7.48    7.00   0
  -3  23  12   -1.04    6.98   0
  -3  24  11   15.39    9.17   0
  -3  25   1   22.96    8.02   0
  -3  25   9    7.88   10.13   0
  -3  26   5   36.89    8.15   0
  -3  26   6   76.59    8.90   0
  -2 -10   3   29.02    7.79   0
  -2  -4  -4   23.05   10.40   0
  -2  -3  15   33.19    6.75   0
  -2  -2  -5    4.93    9.92   0
  -2   0  16   46.74    8.84   0
  -2   1  -6  437.98   12.68   0
  -2   4  17   10.17    7.16   0
  -2   5  17  117.85    8.59   0
  -2   6  17   14.37    7.75   0
  -2   7  17    2.93    9.03   0
  -2   8  17    1.95    8.51   0
  -2   9  17  173.88    8.72   0
  -2  13  16   27.02    6.07   0
  -2  16  15    3.59    9.15   0
  -2  18  14   -8.95    8.16   0
  -2  19  -3  414.29   11.33   0
  -2  19  13  135.66    7.12   0
  -2  20  -2   76.66    7.84   0
  -2  20  12   29.30    6.17   0
  -2  21  -1   55.11    7.33   0
  -2  21  11   15.22    6.49   0
  -2  22  10   19.07    8.54   0
  -2  23   2   -1.74    7.17   0
  -2  23   3  495.59    8.81   0
  -2  23   7  367.64    8.08   0
  -2  23   8   19.73    7.90   0
  -1  -7   3  632.04   20.33   0
  -1  -2  13  167.18    8.91   0
  -1  -1  -3   50.89   12.05   0
  -1   1  14    2.44    5.23   0
  -1   5  15   10.80    7.01   0
  -1   6  15   34.30    7.08   0
  -1   7  15  110.61    8.95   0
  -1   8  15   64.19    7.49   0
  -1  12  14   62.47    6.21   0
  -1  13  14   57.22    7.02   0
  -1  15  13   32.06    7.57   0
  -1  16  -2   -1.78    7.29   0
  -1  16  12   15.52    5.97   0
  -1  18  11   37.14    7.05   0
  -1  19   1   49.68    5.70   0
  -1  19   9   24.77    6.54   0
  -1  20   3    2.20    4.85   0
  -1  20   7   42.78    5.80   0
  -1  20   8   39.94    8.98   0
   0  -3   7    4.75    7.89   0
   0   1  11   66.57    6.93   0
   0   4  12  412.96    9.28   0
   0   5  12    4.38    7.10   0
   0   6  12  129.30    8.12   0
   0   7  12   -7.30    7.10   0
   0   8  12  458.84   10.16   0
   0   9  12   -5.43    7.05   0
   0  11  -1  132.93    8.79   0
   0  11  11   38.84    5.78   0
   0  12  11   -2.16    6.80   0
   0  13   0   -4.30    7.78   0
   0  13  10    1.65    5.46   0
   0  14  10  644.01    9.61   0
   0  15   9   37.68    6.61   0
   0  16   3    0.58    7.20   0
   0  16   4   75.87    5.54   0
   0  16   6   40.87    5.74   0
   0  16   7   -6.85    7.79   0
 -13 -19  -6    5.50   10.74   0
 -13 -18  -7   12.60   10.58   0
 -13 -17  -8   32.16   11.04   0
 -13 -16  -9    8.43    8.21   0
 -13 -13 -11   13.79    8.13   0
 -13 -11 -12   95.86   10.01   0
 -13  -9 -13   -4.18    7.94   0
 -13  -6 -14  -11.21   11.40   0
 -12 -20  -4   -1.81    9.90   0
 -12 -15  -9    0.76    9.57   0
 -12 -12 -11   -0.55    9.70   0
 -12 -10 -12   -5.05    9.89   0
 -12  -8 -13   73.66    7.34   0
 -12  -5 -14    3.06    8.94   0
 -12  -1 -15   14.54    8.80   0
 -11 -22   1    8.85    8.74   0
 -11 -20  -3   75.80    8.49   0
 -11 -13 -10    2.05    6.02   0
 -11 -11 -11   19.43    8.66   0
 -11  -9 -12    5.72    8.73   0
 -11  -3 -14   11.41    8.84   0
 -11   2 -15   59.57    9.39   0
 -11   3 -15    8.89   10.36   0
 -10 -20  -2    0.85    5.97   0
 -10 -17  -6   34.95    5.97   0
 -10 -16  -7   38.60    5.87   0
 -10 -10 -11   10.45    5.50   0
 -10  -5 -13  121.42    8.13   0
 -10  -1 -14  142.12    8.69   0
  -9 -21   4   20.60    7.71   0
  -9 -21   6   32.75    8.62   0
  -9 -20   0    3.47    6.55   0
  -9 -19  -2   19.66    7.06   0
  -9 -16  -6   14.33    5.80   0
  -9 -12  -9  103.13    8.83   0
  -9  -6 -12   16.89    7.12   0
  -9   3 -14   22.66    7.31   0
  -9   4 -14   21.24    8.12   0
  -9  10 -14    8.32    9.24   0
  -9  16 -13  122.56   14.71   0
  -8 -20   4   86.44    7.92   0
  -8 -20   6   66.33    8.64   0
  -8 -20   7  146.90    8.48   0
  -8 -19   0   52.41    7.82   0
  -8 -18  -2  106.65    6.31   0
  -8 -17  14    4.10   14.01   0
  -8 -12  -8   65.92    6.79   0
  -8  -9 -10    6.52    4.91   0
  -8   1 -13   17.90    8.17   0
  -8  17 -12    5.83   12.58   0
  -7 -19   5   35.46    6.92   0
  -7 -19   6   -0.54    6.14   0
  -7 -18  10   49.95   10.66   0
  -7 -16  -3   28.15    6.89   0
  -7 -12  -7   26.34    6.80   0
  -7  -9  -9    8.61    5.21   0
  -7  -7 -10  153.94    6.13   0
  -7  -4 -11   23.72    7.18   0
  -7   0 -12    4.01    6.99   0
  -6 -17   1   21.01    4.80   0
  -6 -16  -1   12.08    7.19   0
  -6  -4 -10    9.93    7.02   0
  -6  14 -11   18.20   11.55   0
  -6  24  -7   23.36   11.92   0
  -5 -15   0   68.70    5.75   0
  -5 -13  -3   86.04    5.42   0
  -5 -12  -4  122.87    7.29   0
  -5 -11  -5  547.83    8.24   0
  -5  -8  -7  312.68    8.56   0
  -5  -6  -8   -0.57    6.82   0
  -5  -4  -9  157.48    6.12   0
  -5  -3  20    8.00   11.00   0
  -5   0 -10    3.81    7.25   0
  -5  20  -8   53.26   13.32   0
  -5  28  -1   12.37    9.78   0
  -4 -14   2  372.29    9.27   0
  -4 -11  -3   18.04    5.03   0
  -4 -10  -4  833.40   10.10   0
  -4  -7  -6    5.22    7.43   0
  -4  -3  -8   17.12    5.10   0
  -4  -2  19   13.86    9.74   0
  -4   1  -9   -0.30    6.86   0
  -4   2  20    9.13    8.93   0
  -4   3  20   -8.80    7.85   0
  -4  28   3  113.04   10.05   0
  -4  28   4   47.42    7.64   0
  -4  28   6   60.82    8.44   0
  -3 -11   0  406.82   10.51   0
  -3  -7  15    5.56    8.74   0
  -3  -4  -6  177.25    7.03   0
  -3   0  18    5.75    6.47   0
  -3   3  -8  127.81    8.70   0
  -3   5  19    8.58    9.14   0
  -3   6  19    3.03    9.87   0
  -3   7  19    6.79    9.93   0
  -3   8  19   13.11    9.01   0
  -3   9  19    6.87    8.51   0
  -3  14  18    2.34   11.47   0
  -3  17  17   -3.78   11.19   0
  -3  19  16  -10.90   11.50   0
  -3  21  -4   91.84    8.24   0
  -3  23  13   10.24    9.99   0
  -3  24  -1   15.65    7.78   0
  -3  24  12   27.24    9.49   0
  -3  25  10   60.17   10.16   0
  -3  26   3   42.51    9.23   0
  -3  26   4   98.47    7.14   0
  -3  26   7   10.32    7.20   0
  -3  26   8   61.45    9.48   0
  -2 -10   7    1.71   11.77   0
  -2  -9  10   26.54   10.15   0
  -2  -5  14   33.97    7.30   0
  -2  -1  16   10.49    8.62   0
  -2   3  17   35.66    7.96   0
  -2  10  17    5.44    6.51   0
  -2  11  17   35.60    9.46   0
  -2  14  16    6.48    6.74   0
  -2  15  16    3.46    7.43   0
  -2  17  15   43.25    8.60   0
  -2  20  13    6.95    8.73   0
  -2  21  12    2.63    8.67   0
  -2  22   0   29.33    7.75   0
  -2  22  11   -5.19    8.72   0
  -2  23   9  321.49   10.20   0
  -2  24   4   26.14    7.39   0
  -2  24   5   10.58    7.82   0
  -2  24   6  -11.56    7.76   0
  -1  -5  11   55.81    8.23   0
  -1   0  14   -2.77    7.11   0
  -1   2  -4  262.66   14.49   0
  -1   3  15   38.92    7.57   0
  -1   4  15   18.34    7.48   0
  -1   9  15    5.03    6.09   0
  -1  10  15   59.46    7.45   0
  -1  11  15  106.61    7.72   0
  -1  14  14   18.03    7.69   0
  -1  16  13   18.24    7.81   0
  -1  17  12   45.31    5.64   0
  -1  19   0    7.07    7.21   0
  -1  19  10    9.44    5.52   0
  -1  20   2   97.39    5.51   0
  -1  20   9   38.91    7.75   0
  -1  21   4  179.94    8.39   0
  -1  21   5   98.52    8.09   0
  -1  21   6  143.65    8.69   0
  -1  21   7   97.74    7.85   0
   0  -2   9   -0.02    7.11   0
   0  -1  10    7.26    7.42   0
   0   3  12    6.63    7.36   0
   0  10  12  620.20    8.61   0
   0  11  12   -1.52    6.75   0
   0  13  11   34.80    6.87   0
   0  15   1   32.59    6.79   0
   0  15  10    2.72    6.39   0
   0  16   2   33.19    7.69   0
   0  16   8   -4.85    5.24   0
   0  17   4   -2.66    7.09   0
   0  17   5   34.49    6.91   0
   0  17   6    0.97    7.32   0
   0  17   7   10.62    6.55   0
   1   5   5   58.21   10.19   0
   1   5   6   23.04    8.65   0
   1   6   4  178.30   10.87   0
   1   6   5   42.10    6.05   0
   1   6   6   40.16    8.45   0
   1   6   7   37.31    7.04   0
   1   7   4  202.94   10.21   0
   1   7   5  226.03    8.10   0
   1   7   6  180.60    6.77   0
   1   7   7   94.49    7.69   0
   1   8   4    2.40    8.70   0
   1   8   5  224.75    9.41   0
   1   8   6  141.61    8.04   0
   1   8   7   94.87    7.67   0
   1   9   5    7.83    7.21   0
   1   9   6   44.34    7.29   0
 -13 -14 -10   28.37    8.72   0
 -13  -8 -13   -4.74   10.65   0
 -12 -22   0   -0.89    9.37   0
 -12 -21  -2    7.12    8.19   0
 -12 -19  -5   22.52    8.92   0
 -12 -18  -6   39.30    9.74   0
 -12 -17  -7    3.31    9.60   0
 -12 -16  -8    5.95    8.88   0
 -12  -7 -13  -11.04   10.30   0
 -12  -4 -14   38.18   10.25   0
 -12   0 -15  207.08    8.72   0
 -12   1 -15    3.11    9.90   0
 -11 -22   2   40.49    9.02   0
 -11 -21  -1    7.08    6.87   0
 -11 -19  -4   10.20    9.08   0
 -11 -15  -8   80.66    8.87   0
 -11 -14  -9    5.34    6.61   0
 -11  -6 -13   -4.41    7.43   0
 -11  -2 -14  112.24    9.48   0
 -11   4 -15   -8.65    9.01   0
 -11   5 -15    9.84   10.22   0
 -11   6 -15   -3.78   10.54   0
 -11   9 -15    6.09   10.60   0
 -11  10 -15   16.68   10.02   0
 -10 -21   1  -13.45    8.31   0
 -10 -20  -1   43.49    8.55   0
 -10 -19  -3   91.25    7.86   0
 -10 -13  -9   29.90    6.09   0
 -10  -7 -12  -15.00    7.77   0
 -10  -4 -13   24.60    7.98   0
 -10   0 -14   29.51    8.09   0
 -10  14 -14   11.05   10.55   0
  -9 -20   1   18.79    7.49   0
  -9 -20  10    0.53   10.29   0
  -9 -18  -3   29.05    7.47   0
  -9 -13  -8    1.71    7.54   0
  -9 -10 -10   14.42    6.07   0
  -9  -8 -11  133.67    7.16   0
  -9  -5 -12   19.53    8.53   0
  -9  -2 -13   77.21    7.62   0
  -9   5 -14   16.47    7.95   0
  -9   6 -14    5.97    8.71   0
  -9   7 -14    3.65    8.49   0
  -9   8 -14   20.29    8.95   0
  -9   9 -14    0.83    7.81   0
  -8 -19   1   20.32    8.12   0
  -8 -17  -3   -2.92    6.42   0
  -8 -13  -7   18.38    6.42   0
  -8 -10  -9  192.92    7.64   0
  -8  -6 -11  182.28    7.35   0
  -8  -3 -12   12.82    6.87   0
  -8   2 -13    3.50    7.93   0
  -8  12 -13   25.75   10.41   0
  -7 -18   1   37.61    6.53   0
  -7 -17  -1   14.24    6.93   0
  -7 -17  12   83.15   13.17   0
  -7 -15  -4  239.19    6.47   0
  -7 -14  -5   12.97    6.47   0
  -7 -13  -6    7.89    5.45   0
  -7 -10  -8    4.72    7.45   0
  -7   1 -12   31.92    6.72   0
  -6 -17   2   45.06    7.02   0
  -6 -17   9   20.34    8.10   0
  -6 -15  -2  112.58    7.63   0
  -6 -15  13   32.52   17.51   0
  -6 -10  -7   49.35    5.15   0
  -6 -10  18   -2.93   11.26   0
  -6  -8  -8   17.91    6.90   0
  -6  -6  -9   26.47    6.91   0
  -6   0 -11   13.54    6.57   0
  -5 -16   5  414.52   11.70   0
  -5 -16   6    2.53    6.96   0
  -5 -16   7  106.51    7.55   0
  -5  -8  18    3.33   10.42   0
  -5  -6  19   30.84    8.36   0
  -5  22  -7   34.96   11.75   0
  -5  26  -4   -5.76   10.36   0
  -4 -13   0    2.48    4.63   0
  -4  -7  17   -1.21    8.92   0
  -4  -5  -7    0.06    5.16   0
  -4  -5  18   20.84    8.62   0
  -4   1  20   11.55   10.02   0
  -4  21  -6   30.90    9.27   0
  -4  25  -3   24.41   10.25   0
  -4  27   0    0.52    9.14   0
  -4  28   2   76.60   10.45   0
  -3 -11  11  126.98   18.27   0
  -3  -7  -4  486.91   11.00   0
  -3  -1  -7    4.75    7.18   0
  -3  -1  18    1.28    9.37   0
  -3   3  19    3.39    8.90   0
  -3   4  -8   94.15    8.50   0
  -3   4  19   -3.01    6.92   0
  -3  10  -8  296.07   14.78   0
  -3  10  19    2.16    7.03   0
  -3  11  19    3.37   11.53   0
  -3  25   0   79.14    9.28   0
  -3  25  11   16.16   11.25   0
  -3  26   2  112.43    9.47   0
  -3  26   9   39.23    9.67   0
  -2 -10   4   10.36    8.65   0
  -2   1  17  174.31    8.45   0
  -2   2  -6   16.53    8.09   0
  -2   2  17   -3.14    5.88   0
  -2  12  17    1.02    6.22   0
  -2  13  17  103.25    8.63   0
  -2  16  16   28.21    8.99   0
  -2  18  15    4.85    9.52   0
  -2  19  14   -3.87    6.95   0
  -2  23   1  436.86   10.68   0
  -2  23  10   13.63    6.16   0
  -2  24   3    5.75    7.99   0
  -2  24   7   13.06    6.80   0
  -2  24   8    5.42    9.17   0
  -1  -7   8   56.22   11.36   0
  -1  -6  10  104.79    8.91   0
  -1  -5   0   31.77   10.85   0
  -1  -4  -1  170.87   10.32   0
  -1  -4  12   24.61    7.14   0
  -1  -1  14   10.75    6.39   0
  -1   2  15    0.75    6.82   0
  -1  12  -4   40.93    9.58   0
  -1  12  15  132.94    8.59   0
  -1  15  -3  100.65    9.37   0
  -1  15  14    1.70    7.75   0
  -1  17  13   73.51    7.51   0
  -1  18  -1   87.87    7.95   0
  -1  18  12   10.47    6.01   0
  -1  19  11   41.47    6.08   0
  -1  20   1   82.26    7.24   0
  -1  20  10   93.59    8.36   0
  -1  21   3  159.57    7.93   0
  -1  21   8   79.73    7.57   0
   0  -3   8   -2.41    7.25   0
   0   0  11    2.74    6.94   0
   0   2  12  300.87    9.24   0
   0   5  13    0.32    6.91   0
   0   6  13   -9.13    7.44   0
   0   7  13   18.05    7.08   0
   0   8  13   -6.30    6.82   0
   0   9  13    2.81    6.33   0
   0  12  -1    1.26    7.47   0
   0  12  12   70.82    7.04   0
   0  14   0 1272.43   14.49   0
   0  14  11    2.12    4.46   0
   0  16   9   -0.57    4.82   0
   0  17   3   11.92    7.52   0
   0  17   8   11.95    6.59   0
   1   4   5  206.14   11.12   0
   1   4   6   87.62    9.09   0
   1   4   7  127.94    8.30   0
   1   5   4   13.32    7.92   0
   1   5   7   -1.83    5.30   0
   1   6   8   38.04    7.65   0
   1   7   3  691.02   13.67   0
   1   7   8   48.97    7.51   0
   1   8   3  365.25   11.22   0
   1   8   8   22.89    6.96   0
   1   9   4   62.82    6.07   0
   1   9   7   73.16    5.58   0
   1  10   4  320.37    9.21   0
   1  10   5   71.50    5.62   0
   1  10   6   86.27    5.81   0
   1  10   7  139.34    7.63   0
 -13 -20  -4   15.96    9.26   0
 -13 -15  -9    6.77    8.39   0
 -13 -12 -11   -3.62    7.20   0
 -13 -10 -12   16.11    8.67   0
 -13  -5 -14    3.76    8.10   0
 -12 -22   1   64.83   11.13   0
 -12 -20  -3   42.06   10.04   0
 -12 -13 -10   20.38    6.59   0
 -12 -11 -11    1.17    8.50   0
 -12  -9 -12    9.52    8.49   0
 -12  -3 -14   16.73    9.93   0
 -12   2 -15   13.79    9.64   0
 -11 -22   3    8.54    9.04   0
 -11 -22   4   31.35    9.33   0
 -11 -21   0   -5.37    8.95   0
 -11 -20  -2   22.40    8.55   0
 -11 -18  -5    0.67    6.26   0
 -11 -17  -6   45.53    8.23   0
 -11 -16  -7   57.03    7.68   0
 -11 -12 -10   72.25    6.39   0
 -11 -10 -11   25.78    8.69   0
 -11  -8 -12  126.88    7.30   0
 -11  -5 -13    4.10    8.54   0
 -11   7 -15   18.80    9.14   0
 -11   8 -15  -10.22    8.80   0
 -10 -21   2   -0.93    8.13   0
 -10 -21   9   -0.26   11.50   0
 -10 -18  -4   28.23    5.54   0
 -10 -17  -5   18.00    7.43   0
 -10 -16  -6    1.34    7.69   0
 -10 -15  -7    6.08    7.46   0
 -10 -14  -8   24.81    6.05   0
 -10 -11 -10   70.07    5.96   0
 -10  -9 -11   67.02    6.23   0
 -10   1 -14  139.62    9.07   0
 -10  13 -14   97.91   11.46   0
  -9 -19  -1   21.23    6.81   0
  -9 -17  -4   11.20    7.57   0
  -9 -16  -5  199.18    9.26   0
  -9 -15  -6   -5.46    8.32   0
  -9 -14  -7   16.79    7.11   0
  -9 -11  -9  242.80    8.68   0
  -9  -1 -13  112.55    8.34   0
  -8 -19  10    6.70    7.91   0
  -8 -18  -1  378.93    9.23   0
  -8 -16  -4    7.60    4.69   0
  -8 -15  -5   16.75    6.06   0
  -8 -14  -6   20.75    4.58   0
  -8  -8 -10   28.89    5.13   0
  -8  -2 -12   16.45    7.77   0
  -8   3 -13   -1.84    7.87   0
  -8  11 -13   -1.41    9.10   0
  -7 -18   2   83.71    7.17   0
  -7  -8  -9   43.77    7.34   0
  -7  -6 -10  128.79    6.66   0
  -7  -3 -11   23.27    6.60   0
  -7  13 -12   27.40    9.40   0
  -6 -17   3  148.37    7.78   0
  -6 -16   0    0.75    7.84   0
  -6 -14  -3   49.81    6.99   0
  -6 -13  -4  321.41    8.38   0
  -6 -12  -5   23.88    7.04   0
  -6 -11  -6   65.39    5.27   0
  -6  -3 -10  133.34    8.10   0
  -6   1 -11  130.04    7.97   0
  -5 -15   1   89.37    7.33   0
  -5 -14  -1   -5.45    5.06   0
  -5  -9  -6   53.64    5.02   0
  -5  -4  20   -0.11   10.90   0
  -5  -3  -9  608.19    9.07   0
  -5   1 -10   10.73    7.30   0
  -5  25  -5  115.81   10.95   0
  -5  27  -3   86.50   10.71   0
  -5  28  -2   28.27    8.93   0
  -4 -14   8  456.02   15.17   0
  -4 -12  -1   -5.08    6.89   0
  -4  -8  -5   28.99    6.91   0
  -4  -3  19    2.11    9.73   0
  -4  -2  -8  108.79    7.67   0
  -4   0  20   55.97   10.50   0
  -4   2  -9    3.22    6.80   0
  -4  24  -4  206.58   10.22   0
  -4  26  -2    4.44    9.01   0
  -4  28   1   98.83   11.00   0
  -3 -10  -1  198.00    7.11   0
  -3  -9  -2  159.45    8.65   0
  -3  -8  -3   83.40    8.70   0
  -3  -6  16  147.92    9.43   0
  -3  -4  17    8.54    7.48   0
  -3  -2  18   62.11    8.89   0
  -3   2  19   15.98    8.91   0
  -3   5  -8   41.00    7.75   0
  -3  12  19   20.17    8.85   0
  -3  18  -6    5.94    9.08   0
  -3  20  -5   33.08    8.88   0
  -3  26   1    7.22    7.67   0
  -3  26  10   62.61    8.67   0
  -3  27   4   30.66   10.29   0
  -3  27   5   21.37    9.87   0
  -3  27   6   28.80   10.20   0
  -3  27   7    2.73    9.61   0
  -3  27   8   21.19    9.88   0
  -2  -5  -3 1187.76   15.05   0
  -2  -4  15    5.05    7.11   0
  -2  -2  16   13.21    8.72   0
  -2  -1  -5  832.36   15.17   0
  -2   6  18   -2.98    7.75   0
  -2   7  18   11.26    9.41   0
  -2   8  18   16.61    8.96   0
  -2   9  18   23.64    7.84   0
  -2  14  17    6.27    9.90   0
  -2  16  -5    2.09    7.35   0
  -2  17  16    9.26    9.63   0
  -2  18  -4   17.90    7.60   0
  -2  19  15  145.69    9.78   0
  -2  20  14   19.69    7.27   0
  -2  21  -2   28.92    6.79   0
  -2  21  13   31.42    6.99   0
  -2  22  -1   44.08    7.88   0
  -2  22  12   15.48    7.26   0
  -2  23   0   18.54    7.63   0
  -2  23  11  215.02   11.14   0
  -2  24   2   35.10    7.91   0
  -2  24   9   -8.29    6.39   0
  -2  25   5  117.36    8.37   0
  -2  25   6   -2.60    7.53   0
  -1  -3  13  288.13   10.06   0
  -1   1  15   14.64    6.87   0
  -1   5  16   13.05    7.36   0
  -1   6  16   30.42    7.97   0
  -1   7  16   71.87    7.66   0
  -1   8  16    6.78    7.26   0
  -1   9  16   17.77    7.92   0
  -1  10  16   20.33    6.99   0
  -1  13  15   62.66    6.11   0
  -1  14  15   31.95    7.78   0
  -1  16  14   33.65    8.51   0
  -1  17  -2   21.80    7.54   0
  -1  18  13   32.22    7.21   0
  -1  19  12    2.95    8.58   0
  -1  20  11   11.50    9.08   0
  -1  21   2  116.85    7.64   0
  -1  21   9  156.62    6.68   0
  -1  22   4   27.30    7.47   0
  -1  22   5  125.92    9.09   0
  -1  22   6   56.11    7.46   0
  -1  22   7  160.55    8.64   0
   0   1  12   -0.89    7.62   0
   0   4  13   -5.45    7.55   0
   0   7  -2   -1.53   12.11   0
   0   8  -2 1110.96   22.24   0
   0  10  13   -6.79    4.81   0
   0  11  13   39.55    7.07   0
   0  13  -1   80.29    7.84   0
   0  13  12    2.13    4.70   0
   0  14  12  529.66    9.31   0
   0  15  11   58.27    5.80   0
   0  16   1    7.75    6.84   0
   0  16  10   27.66    4.66   0
   0  17   2   -3.12    7.42   0
   0  17   9  133.53    5.55   0
   0  18   4  529.86   10.75   0
   0  18   5   -3.11    5.58   0
   0  18   6  220.51    6.56   0
   0  18   7    2.82    5.11   0
   0  18   8  335.83    7.96   0
   1   3   5   85.76   10.06   0
   1   3   6  118.11    9.14   0
   1   3   7  125.75    8.74   0
   1   4   4   26.15    7.80   0
   1   4   8   45.69    7.23   0
   1   5   3  101.43   11.99   0
   1   5   8   13.21    5.01   0
   1   6   3  298.45    9.71   0
   1   7   9  509.34    9.48   0
   1   8   9  198.53    8.17   0
   1   9   3   57.18    6.59   0
   1   9   8   10.13    4.86   0
   1  10   3  113.50    8.19   0
   1  10   8   83.71    7.25   0
   1  11   4  202.92    8.19   0
   1  11   5  411.14    8.15   0
   1  11   6  207.27    6.50   0
   1  11   7  302.20    6.79   0
   1  11   8  138.93    7.15   0
   1  12   5  306.46    8.45   0
   1  12   6  208.89    7.84   0
 -13 -19  -5   -1.93    7.44   0
 -13 -18  -6    0.75    7.00   0
 -13 -17  -7   71.66    7.12   0
 -13 -16  -8    6.46    6.86   0
 -13 -13 -10   64.15    9.45   0
 -13  -7 -13   86.12    9.01   0
 -13  -4 -14   19.14    9.52   0
 -12 -22   2    5.22   11.10   0
 -12 -21  -1   -1.87    7.18   0
 -12 -19  -4   11.67    9.70   0
 -12 -15  -8    3.96    8.41   0
 -12 -14  -9   68.23    6.72   0
 -12  -6 -13   69.56    8.89   0
 -12   3 -15   -3.53    8.95   0
 -12   4 -15   77.05   10.80   0
 -11 -22   5   11.38    8.61   0
 -11 -22   7    3.26    9.76   0
 -11 -19  -3   -2.67    8.39   0
 -11 -13  -9   46.69    7.92   0
 -11  -1 -14   20.24    6.72   0
 -10 -21   3    1.33    7.67   0
 -10 -20   0   -0.32    8.72   0
 -10 -19  -2  240.04    8.55   0
 -10 -12  -9   34.37    7.00   0
 -10  -6 -12   -2.82    5.95   0
 -10  -3 -13   45.00    5.98   0
 -10   2 -14    7.72    6.81   0
 -10   3 -14   96.24    9.46   0
  -9 -20   2   -6.64    5.65   0
  -9 -19  12   13.67   11.25   0
  -9 -18  -2   26.85    8.10   0
  -9  -9 -10    3.16    7.24   0
  -9  -7 -11  391.04    8.11   0
  -9  -4 -12   16.04    8.49   0
  -9   0 -13   11.51    7.44   0
  -9  15 -13   72.46   12.11   0
  -9  19 -12   24.21   15.59   0
  -8 -19   2   14.93    7.58   0
  -8 -18  12  110.43   13.35   0
  -8 -17  -2   23.99    7.63   0
  -8 -11  -8   35.29    5.11   0
  -8  -5 -11   15.87    4.94   0
  -8   4 -13  374.52    8.99   0
  -8   5 -13   12.54    8.19   0
  -8   6 -13  235.43    9.58   0
  -8  10 -13  179.47    9.78   0
  -7 -18   9   20.11    7.71   0
  -7 -17   0  255.97    8.24   0
  -7 -16  -2  436.14    7.96   0
  -7 -11  -7    4.58    5.83   0
  -7  -5 -10   50.42    7.94   0
  -7  -2 -11   26.36    7.01   0
  -7   2 -12  279.17    7.54   0
  -7   3 -12   93.00    7.77   0
  -6 -17   8   33.39    8.18   0
  -6  -9  -7  365.27    8.78   0
  -6   2 -11    1.98    7.94   0
  -6  27  -5   41.06   13.40   0
  -5 -15  10   33.54   10.49   0
  -5 -13  -2  141.20    7.25   0
  -5 -12  -3  111.04    7.50   0
  -5 -12  15   91.70   13.31   0
  -5 -11  -4   32.63    6.59   0
  -5 -11  16   24.82   10.52   0
  -5 -10  -5   72.65    5.20   0
  -5  -7  -7  710.24    9.07   0
  -5  -5  -8    6.90    4.60   0
  -5   2 -10   20.26    7.50   0
  -5  13 -10   21.22   10.88   0
  -4 -14   4  769.82   12.91   0
  -4 -13   1   23.61    6.89   0
  -4 -11  -2   25.87    7.26   0
  -4 -11  14    9.31    9.98   0
  -4 -10  15    4.18    9.67   0
  -4  -9  -4   12.12    6.74   0
  -4  -6  -6   18.13    6.97   0
  -4  -4  -7  527.45    9.79   0
  -4  -1  20   12.45    8.85   0
  -4   3  -9    2.19    6.74   0
  -4  12  -9    1.90   11.82   0
  -4  23  -5    1.76    8.24   0
  -4  27  -1    3.29    9.56   0
  -4  29   3   13.35   11.53   0
  -3 -12   8  269.14   16.06   0
  -3 -11   1  332.85    9.55   0
  -3  -5  -5    3.03    6.03   0
  -3  -3  -6  898.78   12.02   0
  -3   0  -7   -0.11    7.11   0
  -3   1  19  -11.51    9.34   0
  -3   6  -8  424.22   11.91   0
  -3   7  -8  390.46   13.07   0
  -3   8  -8  216.53   11.94   0
  -3   8  20   52.60   10.42   0
  -3   9  -8    2.32    8.32   0
  -3  23  -3   31.64    7.73   0
  -3  24  -2  112.31    9.11   0
  -3  25  -1   23.61    8.77   0
  -3  27   3    1.79    9.21   0
  -2 -10   5   17.11    8.54   0
  -2 -10   6   24.70   10.49   0
  -2  -8   0   17.82    8.67   0
  -2  -7  13   89.39    8.33   0
  -2  -6  -2   20.88    9.93   0
  -2  -3  -4  372.97   12.97   0
  -2   0  17    6.00    8.22   0
  -2   3  18    3.88    8.21   0
  -2   4  18    0.27    9.20   0
  -2   5  18   88.22    7.02   0
  -2  10  18  -13.11    6.94   0
  -2  11  18   11.87    9.98   0
  -2  12  18   18.82    9.05   0
  -2  15  17   90.97    8.19   0
  -2  18  16   -2.11    8.87   0
  -2  20  -3    0.90    6.91   0
  -2  21  14   -1.79    9.99   0
  -2  22  13    4.37    9.20   0
  -2  23  12   -5.59   10.13   0
  -2  24   1   18.82    7.21   0
  -2  24  10   28.69    7.51   0
  -2  25   3  112.73    8.58   0
  -2  25   4   -0.78    8.75   0
  -2  25   7  121.76    7.04   0
  -2  25   8   -2.79    9.14   0
  -1  -2  14   43.41    7.11   0
  -1   0  15   -3.09    6.14   0
  -1   3  16   87.81    8.70   0
  -1   4  16   40.63    8.79   0
  -1  11  16   24.16    8.68   0
  -1  12  16   20.23    7.31   0
  -1  15  15   39.27    9.16   0
  -1  17  14   60.61    8.78   0
  -1  19  -1   43.73    7.71   0
  -1  20   0  157.84    8.06   0
  -1  20  12   97.12    8.22   0
  -1  21   1  185.59    7.88   0
  -1  21  10   50.48    6.49   0
  -1  22   3  147.57    8.47   0
  -1  22   8    2.86    5.81   0
  -1  22   9  106.03    8.30   0
   0  -3   3   11.78   18.15   0
   0  -2  10  239.54    9.01   0
   0  -1  11   57.86    7.61   0
   0   3  13   -6.44    5.66   0
   0   6  -2  100.08   15.58   0
   0   7  14   -0.23    6.07   0
   0   8  14  303.87    8.01   0
   0   9  -2    2.78    8.91   0
   0  12  13   -4.08    5.94   0
   0  13  13   17.45    7.67   0
   0  15   0   -0.05    4.71   0
   0  15  12   16.66    7.70   0
   0  16  11   -3.82    5.23   0
   0  17  10   -1.30    5.26   0
   0  18   3    3.44    5.41   0
   0  18   9   -4.03    7.32   0
   0  19   5   18.02    6.94   0
   0  19   6   -7.63    6.87   0
   0  19   7   16.53    6.16   0
   1   3   4    6.52   11.27   0
   1   3   8  155.36    8.24   0
   1   5   9  104.30    7.71   0
   1   6   9  249.01    7.01   0
   1   9   9   36.86    5.01   0
   1  10   9   66.78    7.39   0
   1  11   3  739.65   11.48   0
   1  11   9  327.36    8.62   0
   1  12   4   44.33    7.58   0
   1  12   7  216.99    6.49   0
   1  12   8  210.25    8.34   0
   1  13   5   52.20    6.77   0
   1  13   6  164.95    7.84   0
   1  13   7  106.01    7.22   0
 -14 -13 -10   49.72   11.30   0
 -13 -21  -1   48.84   11.40   0
 -13 -20  -3   -9.42    9.79   0
 -13 -14  -9   11.66    8.65   0
 -13 -11 -11   36.27    8.11   0
 -13  -9 -12    7.77    7.22   0
 -13  -6 -13   46.82    9.31   0
 -13  -3 -14   84.80   10.22   0
 -12 -22   3   62.01   10.64   0
 -12 -21   0   13.99   10.36   0
 -12 -20  -2   -6.18   10.07   0
 -12 -18  -5  187.54    7.78   0
 -12 -17  -6   42.49    7.71   0
 -12 -16  -7   29.39    6.62   0
 -12 -12 -10   -2.32    6.45   0
 -12 -10 -11  205.16    8.65   0
 -12  -8 -12    8.00    6.84   0
 -12  -5 -13    5.60    9.30   0
 -12  -2 -14   12.71    7.51   0
 -12   5 -15    4.60    9.72   0
 -12   6 -15   36.36   11.61   0
 -12   7 -15   14.67   11.33   0
 -11 -21   1   21.07    6.80   0
 -11 -20  -1  116.39    8.62   0
 -11 -18  -4   10.83    8.81   0
 -11 -15  -7   -7.15    8.61   0
 -11 -14  -8    3.43    6.13   0
 -11 -11 -10   56.60    6.74   0
 -11  -9 -11   17.96    7.87   0
 -11  -7 -12   93.37    6.67   0
 -11  -4 -13   -0.08    6.57   0
 -11   0 -14   -1.59    6.52   0
 -10 -21   4    2.56    7.58   0
 -10 -21   5    0.41    8.53   0
 -10 -21   7   10.10    9.22   0
 -10 -21   8   -2.80    7.91   0
 -10 -18  -3    9.95    7.62   0
 -10 -13  -8  183.55    7.56   0
 -10 -10 -10   28.45    5.45   0
 -10  -8 -11    4.79    5.74   0
 -10  -5 -12  250.42    9.15   0
 -10  -2 -13    5.02    7.01   0
 -10   4 -14   11.64    8.94   0
 -10  11 -14   37.13   11.37   0
 -10  12 -14   -3.98    9.19   0
  -9 -20   3   39.69    7.37   0
  -9 -20   9   21.02    8.29   0
  -9 -19   0   75.02    6.19   0
  -9 -12  -8   12.08    5.39   0
  -9  -6 -11  120.68    8.23   0
  -9   1 -13  139.57    8.55   0
  -8 -19   3    9.32    7.53   0
  -8 -19   9    4.05    7.64   0
  -8 -18   0  313.56    8.78   0
  -8 -16  -3   17.73    6.55   0
  -8 -12  -7   -0.77    6.39   0
  -8  -9  -9   34.65    5.11   0
  -8  -7 -10    6.38    5.12   0
  -8  -4 -11  646.74   10.13   0
  -8  -1 -12    2.44    5.42   0
  -8   7 -13    3.39    7.09   0
  -8   8 -13   79.13    7.97   0
  -8   9 -13   23.04    7.79   0
  -7 -18   3    7.99    7.11   0
  -7 -15  -3    7.00    5.81   0
  -7 -14  -4   35.82    7.52   0
  -7 -13  -5   36.22    7.62   0
  -7 -12  -6   76.46    6.22   0
  -7  -9  -8  151.05    6.17   0
  -7  -7  -9    2.12    7.24   0
  -7   4 -12   19.81    6.89   0
  -7  12 -12  120.07    8.96   0
  -6 -17   5  269.94    9.17   0
  -6 -17   6   74.92    7.55   0
  -6 -17   7   46.08    7.78   0
  -6 -16   1   12.01    7.89   0
  -6 -16  11    3.10    8.88   0
  -6  -7  -8   77.25    7.04   0
  -6  -5  -9  369.83    7.65   0
  -6  -2 -10    7.24    6.63   0
  -6   3 -11    9.65    8.02   0
  -6  13 -11  172.96   11.52   0
  -6  26  -6   36.00   10.82   0
  -5 -15   2   29.81    6.84   0
  -5 -14   0   -0.70    7.16   0
  -5  -7  19   89.69   11.09   0
  -5  -5  20    1.70   12.37   0
  -5  -2  -9  236.28    6.94   0
  -5  24  -6   11.09   10.22   0
  -4 -14   5  119.11    7.41   0
  -4 -14   6  878.50   15.54   0
  -4 -14   7  101.68    8.88   0
  -4 -10  -3   17.35    5.48   0
  -4  -9  16   -2.06    8.96   0
  -4  -6  18   54.86    8.52   0
  -4  -4  19   61.17   10.02   0
  -4  -1  -8    1.69    7.44   0
  -4  28   0   81.51   10.93   0
  -4  29   2    2.65   10.89   0
  -3 -12   4  591.11   12.48   0
  -3  -5  17    2.36    8.25   0
  -3  -3  18   48.00    7.97   0
  -3   0  19    5.06    8.92   0
  -3   4  20   24.39    9.16   0
  -3   5  20   -3.25   10.22   0
  -3   6  20   57.89    8.57   0
  -3   7  20   63.30    8.36   0
  -3  22  -4    9.66    9.43   0
  -3  26   0   67.92    8.98   0
  -3  27   2   15.76    9.03   0
  -3  28   5   19.75    8.87   0
  -3  28   6   -3.33   11.16   0
  -2  -8  12   12.90    8.28   0
  -2  -7  -1   60.56    7.24   0
  -2  -6  14   -1.03    6.26   0
  -2  -3  16   16.54    8.28   0
  -2  -1  17  159.29    9.27   0
  -2   2  18   11.68    7.99   0
  -2   3  -6    4.17    8.52   0
  -2  13  -6   15.55   11.88   0
  -2  13  18   18.17    9.20   0
  -2  14  18    3.87    8.95   0
  -2  16  17   11.69    7.13   0
  -2  17  17   30.18    9.77   0
  -2  19  16    4.58    9.58   0
  -2  20  15    0.82    7.58   0
  -2  22  14   -5.12    9.55   0
  -2  23  13  174.55   10.23   0
  -2  24  11    2.52    7.84   0
  -2  25   9   94.42    7.71   0
  -2  25  10    0.02    8.48   0
  -1  -7   4  201.31   18.21   0
  -1   2  16   55.60    8.30   0
  -1   3  -4   14.30   13.92   0
  -1  13  -4   96.99    9.80   0
  -1  13  16   80.14    8.96   0
  -1  14  16   11.11    8.40   0
  -1  16  -3   60.13    8.67   0
  -1  16  15   42.43    9.22   0
  -1  18  -2   44.66    8.91   0
  -1  18  14  -15.92    8.93   0
  -1  19  13   43.67    6.15   0
  -1  21  11   68.97    6.90   0
  -1  22   2   14.82    7.60   0
  -1  22  10   12.10    8.52   0
  -1  23   5    0.73    7.45   0
  -1  23   6   48.11    7.99   0
  -1  23   7   -8.67    8.06   0
  -1  23   8   54.43    8.31   0
   0  -3   9   12.97    7.05   0
   0   0  12 2444.68   17.52   0
   0   2  13    0.50    5.64   0
   0   5  14   -2.35    7.10   0
   0   6  14  139.48    6.04   0
   0   9  14    0.86    5.08   0
   0  10  -2 1604.26   21.35   0
   0  10  14  205.09    6.73   0
   0  11  14   -3.46    7.88   0
   0  14  -1    0.86    6.65   0
   0  14  13    3.93    8.57   0
   0  16  12    8.33    7.93   0
   0  17   1   80.79    7.68   0
   0  17  11   50.72    6.66   0
   0  18   2  401.92    9.33   0
   0  18  10  360.56    9.81   0
   0  19   4    4.05    5.19   0
   0  19   8   -5.02    5.58   0
   0  19   9   10.78    7.67   0
   1   2   5   44.06   10.91   0
   1   2   6  168.76    8.51   0
   1   2   7   26.40    7.63   0
   1   4   3   29.79    8.06   0
   1   4   9   67.59    5.77   0
   1   5  10    0.03    7.01   0
   1   6   2  147.79   12.25   0
   1   6  10  121.23    7.56   0
   1   7   2  247.93    9.33   0
   1   7  10  152.25    5.97   0
   1   8   2   14.63    6.41   0
   1   8  10   -8.94    4.91   0
   1   9   2    1.45    6.30   0
   1   9  10   12.67    4.86   0
   1  10   2  562.83   11.53   0
   1  10  10  119.09    7.49   0
   1  11  10  209.23    7.87   0
   1  12   3  448.05   10.20   0
   1  12   9  395.66    9.08   0
   1  13   4   93.11    7.44   0
   1  13   8  242.08    8.76   0
   1  14   5   18.42    6.56   0
   1  14   6   41.93    7.09   0
   1  14   7   85.16    7.27   0
 -14 -14  -9    0.34   10.40   0
 -14 -11 -11    5.38    8.64   0
 -14  -9 -12   82.04    9.04   0
 -13 -19  -4   61.98    7.39   0
 -13 -18  -5   27.03    9.86   0
 -13 -17  -6   23.31    9.66   0
 -13 -16  -7   14.83    9.78   0
 -13 -15  -8   40.32    7.12   0
 -13 -12 -10   70.61    8.95   0
 -13  -8 -12    9.95    9.95   0
 -13  -2 -14   18.24    9.99   0
 -12 -22   4    8.79    9.78   0
 -12 -19  -3   20.20    8.91   0
 -12 -13  -9   24.45    6.45   0
 -12  -7 -12   -0.17    8.54   0
 -12  -1 -14   13.31    7.25   0
 -11 -21   2   -0.38    8.35   0
 -11 -19  -2   17.11    8.47   0
 -11 -17  -5   21.80    6.04   0
 -11 -16  -6  188.11    7.36   0
 -11 -12  -9  107.09    8.20   0
 -11  -6 -12  118.21    8.94   0
 -11  -3 -13    3.96    8.66   0
 -11   1 -14    1.51    6.81   0
 -11   2 -14  100.58    9.45   0
 -10 -20   1   38.32    6.73   0
 -10 -19  -1   19.97    7.36   0
 -10 -17  -4   26.71    5.43   0
 -10 -16  -5   27.17    7.16   0
 -10 -15  -6   79.92    7.78   0
 -10 -14  -7   22.99    5.68   0
 -10 -11  -9   10.02    7.76   0
 -10  -7 -11   20.26    7.50   0
 -10  -1 -13   42.80    7.58   0
 -10   5 -14  184.71    7.76   0
 -10   6 -14    9.78    8.56   0
 -10   7 -14   -1.70    9.30   0
 -10   8 -14   15.89    8.97   0
 -10   9 -14  135.25    9.87   0
 -10  10 -14   13.98    9.81   0
 -10  17 -13   11.66   14.90   0
  -9 -20   4    5.21    5.98   0
  -9 -20   7   21.73    9.29   0
  -9 -20   8   -0.25    7.09   0
  -9 -19   1   30.24    7.66   0
  -9 -16  -4    4.52    7.71   0
  -9 -15  -5   28.61    7.78   0
  -9 -14  -6   16.73    7.19   0
  -9 -13  -7   23.60    5.68   0
  -9 -10  -9   22.15    5.00   0
  -9  -8 -10   26.84    7.00   0
  -9  -3 -12   36.36    5.91   0
  -9   2 -13   82.83    8.05   0
  -9  14 -13    7.72   10.25   0
  -8 -19   4    6.78    7.39   0
  -8 -19   8    3.37    8.93   0
  -8 -15  -4   33.38    5.24   0
  -8 -14  -5  231.42    7.33   0
  -8 -13  -6   15.23    4.96   0
  -8 -10  -8  162.77    7.77   0
  -8   0 -12   74.17    8.04   0
  -8  16 -12    2.75   11.97   0
  -7 -18   8   37.30    7.09   0
  -7 -17   1    7.41    6.74   0
  -7 -16  -1   19.99    6.85   0
  -7 -10  -7   -2.37    6.68   0
  -7  -4 -10   13.06    8.18   0
  -7  -1 -11   14.55    7.02   0
  -7   5 -12    0.91    6.69   0
  -7   6 -12  214.29    9.56   0
  -7  11 -12   41.68    8.48   0
  -7  17 -11    4.99   13.02   0
  -6 -14  -2   38.01    7.57   0
  -6 -11  -5   10.94    6.90   0
  -6 -10  -6    8.31    5.00   0
  -6   4 -11    0.65    7.91   0
  -5 -14  12    2.24   14.00   0
  -5 -10  17   14.52    8.98   0
  -5  -8  -6   -0.10    4.72   0
  -5  -6  -7  421.17    9.17   0
  -5  -4  -8    5.90    6.49   0
  -5  -1  -9  125.97    7.98   0
  -5   3 -10   18.72    5.37   0
  -4  -8  17    9.36    8.94   0
  -4  -7  -5   53.99    7.25   0
  -4  -2  20    8.79    9.95   0
  -4   4  -9  228.26    8.45   0
  -4  26  -3   23.11    9.91   0
  -4  29   1   26.01    9.79   0
  -3 -12   5  316.01   11.29   0
  -3  -9  14    1.20    8.94   0
  -3  -8  15   60.68    8.80   0
  -3  -6  -4  371.32    8.98   0
  -3  -2  -6 1426.52   15.67   0
  -3  -1  19    4.34    7.91   0
  -3   1  -7   11.46    7.50   0
  -3   3  20   68.90   10.28   0
  -3  27   1    2.21    8.46   0
  -3  28   3   25.59    9.13   0
  -3  28   4   24.93    6.84   0
  -2  -5  15  312.53   10.04   0
  -2   1  18   16.44    7.89   0
  -2   7  19    2.38    8.85   0
  -2   8  19   -6.33    8.79   0
  -2   9  19  188.50   10.13   0
  -2  10  19   -0.32    8.21   0
  -2  15  18  -12.77   11.23   0
  -2  19  -4   18.58    8.30   0
  -2  22  -2   68.80    7.50   0
  -2  23  -1  433.21   11.23   0
  -2  24   0   -0.00    7.18   0
  -2  24  12   15.78    8.11   0
  -2  25   2    7.54    6.50   0
  -2  25  11   60.53   10.12   0
  -2  26   4   53.98    9.39   0
  -2  26   5    2.00    6.37   0
  -2  26   6   57.83    6.82   0
  -2  26   7    1.01    7.10   0
  -2  26   8   18.17   10.03   0
  -2  26   9   17.05    8.51   0
  -1  -5  12   -2.02    6.06   0
  -1  -4  13  127.13    8.60   0
  -1  -2  -2  376.48   13.01   0
  -1  -1  15    4.22    7.34   0
  -1   0  -3   -0.16   11.68   0
  -1   1  16   15.89    7.64   0
  -1   5  17   22.01    7.44   0
  -1   6  17   52.83    8.02   0
  -1   7  17   74.21    8.46   0
  -1   8  17   16.57    8.59   0
  -1   9  17  -10.63    8.57   0
  -1  10  17   26.00    8.69   0
  -1  11  17   80.28    8.24   0
  -1  15  16  -10.09    8.62   0
  -1  17  15   20.38    6.64   0
  -1  19  14    3.29    9.07   0
  -1  20  13   42.58    6.44   0
  -1  21  12   94.35    6.91   0
  -1  22  11   58.19    9.25   0
  -1  23   3   12.76    7.13   0
  -1  23   4   37.27    5.80   0
  -1  23   9    5.70    8.62   0
   0  -4   6  237.67   13.84   0
   0  -4   7   -0.30    9.16   0
   0  -2  11   -4.33    6.16   0
   0   1  13   58.02    7.47   0
   0   3  14    2.39    6.57   0
   0   4  14  125.29    6.11   0
   0  11  -2    1.27    7.62   0
   0  12  14   49.65    6.20   0
   0  13  14    4.98    7.58   0
   0  15  13   15.69    5.66   0
   0  16   0    0.51    4.87   0
   0  17  12  -14.26    7.93   0
   0  18  11   -7.23    7.47   0
   0  19   3    6.78    5.41   0
   0  19  10    1.07    7.31   0
   0  20   5    3.52    6.48   0
   0  20   6  177.54    6.53   0
   0  20   7   -4.23    7.63   0
   0  20   8   19.06    8.77   0
   1   2   4  261.04   13.44   0
   1   2   8  103.07    6.68   0
   1   3   9  405.87    8.48   0
   1   4  10   23.34    6.83   0
   1   5   2    9.10   11.14   0
   1   6  11  188.14    7.87   0
   1   7  11  278.80    8.59   0
   1   8  11   65.89    7.10   0
   1   9  11   11.99    6.89   0
   1  10  11   75.42    7.90   0
   1  11   2  659.64   11.54   0
   1  12  10  201.07    8.66   0
   1  13   3  170.79    8.20   0
   1  13   9  165.80    6.33   0
   1  14   4    1.89    6.94   0
   1  14   8    2.00    5.28   0
   1  14   9   41.54    7.24   0
   1  15   5   41.58    7.03   0
   1  15   6    3.86    6.74   0
   1  15   7   41.71    7.14   0
 -14 -18  -5    4.24   11.49   0
 -14 -16  -7    0.29   10.60   0
 -14 -15  -8  108.23    9.90   0
 -14 -12 -10    8.77   10.94   0
 -13 -21   0   85.23   10.06   0
 -13 -20  -2   20.75    8.46   0
 -13 -13  -9    2.86    9.61   0
 -13 -10 -11    0.22    7.51   0
 -13  -5 -13   24.37    9.05   0
 -13  -1 -14   16.62    9.71   0
 -12 -21   1   -2.51    7.45   0
 -12 -20  -1   81.07    9.96   0
 -12 -18  -4   41.14    8.59   0
 -12 -15  -7   24.99    9.47   0
 -12 -14  -8    2.61    6.53   0
 -12 -11 -10   14.85    6.76   0
 -12  -9 -11   28.83    8.29   0
 -12  -4 -13   86.78    6.76   0
 -12   0 -14  -13.99    8.87   0
 -11 -21   3   39.93    8.68   0
 -11 -20   0   16.23    6.32   0
 -11 -18  -3   13.62    8.22   0
 -11 -13  -8    5.72    7.58   0
 -11 -10 -10   36.60    5.93   0
 -11  -8 -11   15.01    7.31   0
 -11  -2 -13   41.09    8.86   0
 -11   3 -14   20.75    8.56   0
 -10 -20   2    5.81    8.78   0
 -10 -18  -2   69.27    7.68   0
 -10 -12  -8    0.87    7.68   0
 -10  -9 -10  478.81    8.21   0
 -10  -4 -12   31.11    7.21   0
 -10   0 -13   -7.65    7.80   0
  -9 -18  -1   25.71    5.64   0
  -9 -11  -8   35.16    7.57   0
  -9  -5 -11   65.91    7.84   0
  -9  -2 -12   49.06    8.21   0
  -9   3 -13  158.14    8.76   0
  -8 -19   6   25.86    7.53   0
  -8 -19   7   16.48    7.14   0
  -8 -18   1  346.79    8.14   0
  -8 -17  -1  140.32    5.85   0
  -8  -8  -9  109.28    5.71   0
  -8  -6 -10   24.77    5.25   0
  -8  -3 -11    6.03    7.07   0
  -8   1 -12   18.31    7.46   0
  -7 -18   6  163.17    9.43   0
  -7 -18   7    4.23    6.97   0
  -7 -15  -2  161.56    8.16   0
  -7 -11  -6   46.99    7.20   0
  -7  -8  -8  367.41    8.58   0
  -7  -6  -9   12.39    6.72   0
  -7   0 -11    0.96    6.73   0
  -7   7 -12  179.47    9.00   0
  -7   8 -12  194.67    9.25   0
  -7   9 -12   27.63    8.17   0
  -7  10 -12   10.88    8.66   0
  -7  23  -9   18.82   23.86   0
  -7  25  -8   45.09   15.70   0
  -6 -16   2   72.10    7.78   0
  -6 -15   0   54.42    7.57   0
  -6 -13  -3  154.98    6.25   0
  -6 -12  -4   11.95    4.83   0
  -6  -8  -7   -0.28    6.43   0
  -6  -6  -8   -2.10    7.12   0
  -6  -4  -9    9.53    5.02   0
  -6  -1 -10   39.63    5.70   0
  -6   5 -11  130.97    8.72   0
  -6  12 -11    2.46    8.41   0
  -6  23  -8   20.48   11.87   0
  -5 -13  -1   89.70    6.97   0
  -5  -9  -5   81.18    7.16   0
  -5  -9  18   -0.41   12.09   0
  -5   4 -10    3.99    6.81   0
  -5  12 -10   10.57    9.36   0
  -5  27  -4   35.84   10.28   0
  -5  28  -3    5.92   10.75   0
  -4 -13   2   17.14    6.25   0
  -4 -12   0    1.16    4.85   0
  -4  -5  -6   26.59    7.04   0
  -4  -5  19    2.77   10.52   0
  -4  -3  -7   -4.69    6.62   0
  -4   0  -8  186.34    8.84   0
  -4   5  -9   13.06    6.99   0
  -4  11  -9   21.79    9.53   0
  -4  22  -6  145.58   12.08   0
  -4  25  -4   44.35    7.96   0
  -4  27  -2    0.40    9.68   0
  -4  28  -1  118.06   10.02   0
  -3 -12   6  601.27   15.00   0
  -3 -12   7  112.94   10.66   0
  -3 -10   0  333.95    8.39   0
  -3  -7  -3   50.16    8.59   0
  -3  -7  16   96.56    8.97   0
  -3  -4  -5  155.79    9.33   0
  -3   2  20  113.21   10.36   0
  -3  25  -2   59.33    8.44   0
  -3  26  -1   14.23    7.71   0
  -3  28   2    5.02    9.11   0
  -2  -4  -3    7.41   11.03   0
  -2  -4  16    1.03    6.85   0
  -2  -2  17    7.96    7.91   0
  -2   0  -5    2.82    9.61   0
  -2   4  -6    6.03    9.83   0
  -2   4  19    7.94    8.16   0
  -2   5  19  142.55   10.39   0
  -2   6  19    2.40    7.31   0
  -2  11  19   44.45    7.76   0
  -2  12  19   -3.68   10.99   0
  -2  21  -3   12.66    8.76   0
  -2  25   1  125.15    8.65   0
  -2  26   3    6.46    8.21   0
  -2  26  10   64.00   10.66   0
  -1  -7   9  513.28   16.23   0
  -1  -6   2  164.37   15.42   0
  -1  -6  11  191.92   10.26   0
  -1  -3  14   49.89    7.39   0
  -1   4  17   29.31    8.00   0
  -1  12  17   52.12    6.64   0
  -1  13  17    2.90    8.82   0
  -1  16  16   31.80    9.85   0
  -1  18  15   28.53    7.38   0
  -1  20  -1   84.48    7.31   0
  -1  20  14   76.48    9.09   0
  -1  21   0   59.62    5.44   0
  -1  21  13   58.08   10.23   0
  -1  22   1  196.77    9.18   0
  -1  22  12   -3.85    9.57   0
  -1  23  10   13.43    6.52   0
  -1  24   5   -0.56    7.85   0
  -1  24   6   43.13    8.56   0
  -1  24   7    7.60    8.32   0
  -1  24   8   40.75    8.72   0
   0  -3  10   -3.25    6.28   0
   0  -1  12    5.34    7.62   0
   0   0  13    6.62    6.57   0
   0   2  14  312.09    8.44   0
   0   6  15    2.23    7.74   0
   0   7  15   -1.24    8.29   0
   0   8  15    2.01    5.65   0
   0   9  15   -2.66    6.29   0
   0  10  15   -1.56    7.47   0
   0  11  15   12.99    7.42   0
   0  14  14  159.60    6.48   0
   0  15  -1   21.08    6.95   0
   0  15  14   -9.90    7.09   0
   0  16  13    7.34    5.70   0
   0  17   0    0.66    6.43   0
   0  18   1    0.55    7.18   0
   0  18  12  315.94    9.27   0
   0  19   2   -4.42    7.38   0
   0  19  11   19.43    7.98   0
   0  20   3    0.20    6.34   0
   0  20   4  131.79    5.99   0
   0  20   9    5.89    5.46   0
   0  21   6    3.14    7.31   0
   0  21   7   70.04    8.07   0
   1   1   6   22.53    8.83   0
   1   1   7   54.51    7.95   0
   1   2   9  235.09    9.30   0
   1   3   3   11.94    8.19   0
   1   3  10  331.55    8.92   0
   1   5  11   52.21    7.52   0
   1  11  11  297.43    7.47   0
   1  12   2  346.86    9.57   0
   1  12  11  229.25    8.41   0
   1  13  10  174.94    6.55   0
   1  14   3   43.73    6.90   0
   1  14  10    3.61    6.55   0
   1  15   4    9.05    6.70   0
   1  15   8   17.41    5.54   0
   1  15   9   57.38    7.06   0
   1  16   6   30.11    6.76   0
   1  16   7    4.71    7.25   0
 -14 -17  -6   62.86    8.08   0
 -14 -13  -9    0.60   10.31   0
 -14 -10 -11    6.09    7.70   0
 -14  -8 -12    6.06    7.82   0
 -14  -5 -13   21.22   11.14   0
 -13 -21   1   40.94   11.27   0
 -13 -19  -3   13.02    8.12   0
 -13 -14  -8   20.29    9.89   0
 -13 -11 -10  110.53   10.68   0
 -13  -9 -11    4.83   10.40   0
 -13  -7 -12   67.49    9.10   0
 -13  -4 -13   19.15    9.89   0
 -12 -21   2   19.81    8.21   0
 -12 -19  -2    8.27    8.75   0
 -12 -17  -5   53.06    6.60   0
 -12 -16  -6   15.76    6.54   0
 -12 -12  -9    9.63    7.72   0
 -12  -6 -12   44.03    9.43   0
 -12  -3 -13    3.80    8.81   0
 -12   1 -14    3.85    9.13   0
 -11 -21   4   -0.36    8.70   0
 -11 -21   5   25.49   10.05   0
 -11 -21   8    2.31   11.73   0
 -11 -20   1  104.02    9.47   0
 -11 -19  -1  -25.38    8.50   0
 -11 -17  -4   80.00    8.70   0
 -11 -16  -5   17.12    7.81   0
 -11 -15  -6   51.93    7.51   0
 -11 -14  -7   21.88    6.80   0
 -11 -11  -9   15.33    7.57   0
 -11  -5 -12   28.62    6.29   0
 -11   4 -14   34.61    8.73   0
 -11  13 -14    2.56   11.37   0
 -10 -20   3   33.76    8.75   0
 -10 -19   0  281.26    8.93   0
 -10 -17  -3   21.92    6.86   0
 -10 -13  -7   38.97    8.21   0
 -10 -10  -9   21.81    8.47   0
 -10  -6 -11   28.77    7.80   0
 -10   1 -13   47.45    8.12   0
  -9 -19   2   21.49    6.97   0
  -9 -19  11    4.53   10.73   0
  -9 -17  -2   28.49    7.55   0
  -9 -12  -7    2.14    6.70   0
  -9  -9  -9   61.70    7.16   0
  -9  -7 -10   50.26    7.34   0
  -9  -1 -12   72.97    8.61   0
  -9   4 -13    7.41    7.69   0
  -9  13 -13   13.09   10.14   0
  -8 -18   2  114.36    8.45   0
  -8 -16  -2   32.59    6.47   0
  -8 -12  -6   64.48    7.06   0
  -8 -11  -7   18.56    5.08   0
  -8   2 -12   17.48    7.70   0
  -7 -17   2  263.34    8.93   0
  -7 -17  11    5.51   10.00   0
  -7 -16   0  558.43   10.00   0
  -7 -14  -3   84.39    8.01   0
  -7 -13  -4   19.82    7.02   0
  -7 -12  -5    7.61    7.08   0
  -7  -3 -10  145.20    7.95   0
  -6 -12  17    0.68   13.34   0
  -6   0 -10    7.01    7.50   0
  -6   6 -11   27.27    7.43   0
  -6   7 -11   -0.18    8.06   0
  -6  11 -11   50.39    8.66   0
  -6  25  -7    4.53   12.81   0
  -5 -15   9   69.43    9.26   0
  -5 -14   1    3.77    6.70   0
  -5 -12  -2   41.67    4.89   0
  -5 -11  -3  209.22    7.95   0
  -5 -10  -4  102.68    5.62   0
  -5  -3  -8   10.68    7.07   0
  -5   0  -9   -0.95    6.96   0
  -5   5 -10    2.58    7.52   0
  -5  26  -5   43.84   10.87   0
  -4 -11  -1   21.58    7.36   0
  -4  -8  -4  291.90    7.27   0
  -4  -7  18    4.70    9.18   0
  -4  -3  20   -2.73    9.86   0
  -4   6  -9  384.40   10.63   0
  -4   7  -9   18.25    8.43   0
  -4  10  -9   23.09    9.62   0
  -4  20  -7   36.51   11.08   0
  -4  29   0    8.38   10.79   0
  -3 -10  13   32.89   10.95   0
  -3  -9  -1  388.30    9.20   0
  -3  -8  -2  868.32   13.18   0
  -3  -4  18   42.29    8.34   0
  -3  -2  19    7.68    9.14   0
  -3   1  20   16.28    9.89   0
  -3  21  -5   45.99    9.96   0
  -3  24  -3   16.23    7.71   0
  -3  27   0   62.77    8.79   0
  -3  29   4    7.16    9.74   0
  -2  -2  -4    2.46   10.86   0
  -2   0  18   12.18    6.22   0
  -2   3  19   24.31    8.38   0
  -2  17  -5   70.99   10.48   0
  -2  26   2   57.90    9.03   0
  -2  27   5   48.77    9.85   0
  -2  27   6   14.69    7.26   0
  -2  27   7   38.15    7.08   0
  -2  27   8   -8.59   11.09   0
  -2  27   9   19.45   10.34   0
  -1  -2  15    6.57    7.10   0
  -1   0  16   -2.64    8.01   0
  -1   3  17   41.47    5.81   0
  -1  14  -4    1.58    8.32   0
  -1  14  17   26.91    7.48   0
  -1  15  17   28.40    9.25   0
  -1  17  -3  118.31    8.80   0
  -1  17  16   31.23    7.30   0
  -1  19  -2   48.42    8.23   0
  -1  19  15   10.43    7.50   0
  -1  22  13   34.75    9.42   0
  -1  23   2   32.74    6.37   0
  -1  23  11    1.88    7.40   0
  -1  24   4   25.89    6.31   0
  -1  24   9    1.76    6.50   0
  -1  24  10   -0.35    9.05   0
   0  -4   5   -0.85   12.76   0
   0  -4   8  567.64   13.57   0
   0   4  15    7.33    7.62   0
   0   5  -2    1.48   13.53   0
   0   5  15   18.23    5.04   0
   0  12  -2  149.34    9.00   0
   0  12  15   -1.19    5.64   0
   0  13  15   10.55    7.95   0
   0  16  14   10.07    8.45   0
   0  17  13   38.72    5.96   0
   0  19  12  -16.13    8.02   0
   0  20  10    5.35    5.77   0
   0  20  11   13.95    7.51   0
   0  21   4   -5.07    6.91   0
   0  21   5  103.62    5.92   0
   0  21   8    8.08    5.53   0
   0  21   9   99.83    8.36   0
   1   1   5   38.64   10.41   0
   1   1   8   19.24    5.99   0
   1   2  10  316.54    9.14   0
   1   4   2  173.65   13.19   0
   1   4  11   40.33    5.69   0
   1   6  12   87.18    7.89   0
   1   7   1  369.15   13.30   0
   1   7  12  106.43    7.47   0
   1   8   1  418.75   12.46   0
   1   8  12    3.41    5.43   0
   1   9   1   72.07    8.94   0
   1   9  12   -0.38    5.56   0
   1  10   1  175.43    9.49   0
   1  10  12  260.14    8.37   0
   1  11  12  288.25    8.71   0
   1  13   2  319.37    9.59   0
   1  13  11   88.65    5.43   0
   1  14  11   26.20    6.18   0
   1  15   3   96.06    7.61   0
   1  15  10   21.21    7.03   0
   1  16   4   20.57    6.77   0
   1  16   5   44.75    5.59   0
   1  16   8    6.31    5.22   0
   1  16   9  131.81    7.49   0
 -14 -14  -8   42.43    9.83   0
 -14 -11 -10   19.10    9.78   0
 -14  -7 -12    1.41   10.86   0
 -13 -20  -1    3.16    7.46   0
 -13 -18  -4   18.51    6.85   0
 -13 -17  -5  117.18    9.19   0
 -13 -16  -6   -0.93    9.12   0
 -13 -15  -7   22.72    7.58   0
 -13 -12  -9    2.59    9.14   0
 -13   0 -14    2.17    7.37   0
 -12 -21   3   -3.42    9.61   0
 -12 -20   0    3.52    9.04   0
 -12 -18  -3  148.46    9.03   0
 -12 -13  -8   -6.28    7.95   0
 -12 -10 -10   34.74    6.49   0
 -12  -8 -11  105.19    6.73   0
 -12   2 -14   25.25    9.14   0
 -11 -21   6   15.45    8.08   0
 -11  -9 -10    8.73    7.14   0
 -11  -7 -11    8.17    5.61   0
 -11  -4 -12    9.06    7.96   0
 -11  -1 -13   -0.84    7.93   0
 -11   5 -14   23.21    7.96   0
 -11   6 -14   79.05    9.30   0
 -11  11 -14   23.84   10.84   0
 -11  12 -14  100.46   11.61   0
 -10 -20   4    5.64    8.27   0
 -10 -20  10   -0.48    8.78   0
 -10 -18  -1    8.27    7.59   0
 -10 -16  -4   -0.26    6.96   0
 -10 -15  -5   10.14    7.86   0
 -10 -14  -6    9.91    6.21   0
 -10  -8 -10    2.38    6.52   0
 -10  -3 -12  165.15    6.67   0
 -10  16 -13   26.99   12.28   0
  -9 -19   3    5.86    7.93   0
  -9 -18   0   97.41    6.62   0
  -9 -16  -3   82.46    5.94   0
  -9 -15  -4   34.24    7.30   0
  -9 -14  -5    2.17    7.52   0
  -9 -13  -6   -1.54    6.00   0
  -9  -4 -11    7.06    6.67   0
  -9   5 -13   35.30    7.56   0
  -9   6 -13  141.34    9.37   0
  -9  12 -13   18.25    8.59   0
  -8 -18  11  110.77   10.49   0
  -8 -17   0    6.76    6.13   0
  -8 -15  -3   22.73    4.94   0
  -8 -14  -4   18.19    6.87   0
  -8 -13  -5   27.44    6.47   0
  -8  -9  -8   17.86    4.98   0
  -8  -7  -9    5.93    6.90   0
  -8  -5 -10    9.15    5.15   0
  -8  -2 -11   -0.15    6.79   0
  -8  15 -12   31.36   10.04   0
  -7  -9  -7   14.43    6.63   0
  -7   1 -11    5.95    7.04   0
  -6 -16   3   90.26    7.85   0
  -6 -14  -1   29.48    7.34   0
  -6 -11  18   12.11   13.63   0
  -6  -9  -6  336.41    6.99   0
  -6  -3  -9   28.76    5.54   0
  -6   8 -11   10.64    7.10   0
  -6   9 -11  228.31    9.72   0
  -6  10 -11   20.91    7.07   0
  -5 -15   5  447.97   11.38   0
  -5  -7  -6  107.51    5.81   0
  -5  -5  -7  164.50    8.04   0
  -5   6 -10   -0.65    7.27   0
  -5   7 -10   78.61    9.13   0
  -5  11 -10   11.39    8.25   0
  -5  23  -7    0.03   12.56   0
  -4 -10  -2  325.84    7.86   0
  -4  -9  -3   10.33    4.91   0
  -4   1  -8   -1.95    7.67   0
  -4   8  -9    7.74    8.26   0
  -4   9  -9   17.31    8.20   0
  -4  24  -5    2.70    9.72   0
  -3  -6  17    7.28    7.80   0
  -3   0  20   -2.53    9.58   0
  -3   2  -7   82.05    7.94   0
  -3  16  -7   30.44   14.24   0
  -3  19  -6    7.24    8.39   0
  -3  23  -4   24.69    8.69   0
  -3  28   1   21.94   10.11   0
  -3  29   3   30.90   11.27   0
  -2  -9  11  609.27   19.27   0
  -2  -3  17   31.50    8.01   0
  -2  -1  18   22.49    8.89   0
  -2   2  19   -9.63    9.27   0
  -2   7  20   -3.82    9.92   0
  -2   8  20   12.19    9.84   0
  -2  23  -2   -2.11    7.22   0
  -2  24  -1   12.55    7.58   0
  -2  25   0   -3.22    8.01   0
  -2  27   3   27.86    7.85   0
  -2  27   4   25.47    7.18   0
  -1  -3  -1  678.25   18.15   0
  -1  -1  16   20.91    7.53   0
  -1   2  17   11.22    5.53   0
  -1   5  18    5.79    8.12   0
  -1   6  18   24.87    8.79   0
  -1   7  18   29.62    6.52   0
  -1   8  18   16.51    7.02   0
  -1   9  18   31.58    6.55   0
  -1  10  18    7.74    6.91   0
  -1  11  18   45.45   10.27   0
  -1  12  18   95.52   10.18   0
  -1  16  17   22.08    9.65   0
  -1  18  16    8.76    6.86   0
  -1  20  15    6.71    9.85   0
  -1  21  -1  178.10    8.97   0
  -1  21  14   79.19    7.36   0
  -1  22   0   -5.47    7.01   0
  -1  23   1    9.00    8.43   0
  -1  23  12   40.18    7.56   0
  -1  24   3   -0.46    5.54   0
  -1  24  11   -1.41   10.12   0
  -1  25   5   97.84    9.17   0
  -1  25   6   42.51    8.47   0
  -1  25   7   92.98    6.95   0
  -1  25   8    9.73    8.55   0
  -1  25   9   65.91    9.30   0
   0  -4   9    2.29    7.90   0
   0  -2  12  280.96    9.75   0
   0  -1  13   54.11    7.12   0
   0   1  14   -6.48    5.23   0
   0   3  15   12.42    7.51   0
   0   7  16   -0.01    6.72   0
   0   8  16  127.50    8.55   0
   0   9  16    4.81    8.10   0
   0  10  16   99.78    8.09   0
   0  11  16   -4.75    7.22   0
   0  13  -2    2.55    7.31   0
   0  14  15   -1.75    6.32   0
   0  15  15    0.75    8.82   0
   0  16  -1   -1.83    6.76   0
   0  17  14  -12.48    9.49   0
   0  18   0  346.31    8.99   0
   0  18  13    4.71    5.96   0
   0  19   1   -2.56    7.45   0
   0  20   2   37.87    6.95   0
   0  20  12  -11.51    8.20   0
   0  21   3   10.90    6.21   0
   0  21  10    5.70    8.28   0
   0  22   6  279.25    9.35   0
   0  22   7  -15.96    8.07   0
   0  22   8  163.22    7.99   0
   1   1   9  213.48    9.22   0
   1   3  11  142.21    6.36   0
   1   4  12   15.24    6.83   0
   1   5  12    1.85    5.04   0
   1   8  13   90.76    6.96   0
   1   9  13   16.05    6.68   0
   1  10  13   59.60    6.40   0
   1  11   1  916.29   13.43   0
   1  12   1  956.64   12.95   0
   1  12  12  208.63    6.08   0
   1  13  12  116.66    7.49   0
   1  14   2   18.10    6.93   0
   1  15  11   90.36    8.02   0
   1  16  10   57.61    6.91   0
   1  17   5   33.18    7.00   0
   1  17   6   58.43    5.82   0
   1  17   7   32.77    5.39   0
   1  17   8   32.75    5.33   0
   1  17   9  181.15    7.55   0
 -14 -18  -4   32.74    7.96   0
 -14 -17  -5   33.54   10.41   0
 -14 -16  -6    3.85    9.83   0
 -14 -15  -7   10.83    8.78   0
 -14  -9 -11   10.22    7.06   0
 -14  -4 -13   -1.94    7.95   0
 -13 -20   0   13.25    9.44   0
 -13 -19  -2   20.79    9.02   0
 -13 -10 -10   30.44    9.26   0
 -13  -8 -11    0.15    9.21   0
 -13  -6 -12    5.42    7.53   0
 -13  -3 -13   50.96    7.67   0
 -13   1 -14   28.02    7.21   0
 -12 -21   4    1.80    9.84   0
 -12 -20   1   73.79   10.23   0
 -12 -19  -1   60.16    8.53   0
 -12 -17  -4   23.74    7.77   0
 -12 -16  -5   -7.60    8.48   0
 -12 -15  -6   33.44    9.15   0
 -12 -14  -7  188.03    7.82   0
 -12 -11  -9   10.22    8.16   0
 -12  -5 -12   12.69    6.35   0
 -12  -2 -13    6.27    6.67   0
 -12   3 -14    4.35    7.31   0
 -12   4 -14   29.92   10.41   0
 -11 -20   2   26.13    7.71   0
 -11 -19   0  -15.45    8.74   0
 -11 -18  -2   51.98    6.39   0
 -11 -12  -8  103.93    6.55   0
 -11   0 -13    3.33    8.09   0
 -11   7 -14   43.62    7.68   0
 -11   8 -14   99.44    9.70   0
 -11   9 -14    5.80    8.65   0
 -11  10 -14   10.94    9.22   0
 -10 -20   5   19.18    9.00   0
 -10 -20   9   20.76    9.64   0
 -10 -19   1   36.09    5.65   0
 -10 -11  -8   34.57    5.91   0
 -10  -5 -11  203.05    9.27   0
 -10  -2 -12    3.05    7.70   0
 -10   2 -13    7.70    5.52   0
  -9 -19   4   37.26    8.05   0
  -9 -19  10   13.46    9.84   0
  -9 -18   1   20.19    7.78   0
  -9 -18  13   10.15   13.70   0
  -9 -17  -1  380.17    9.86   0
  -9 -10  -8   23.43    4.61   0
  -9  -8  -9  128.08    7.15   0
  -9  -6 -10   -1.20    6.11   0
  -9   0 -12   -1.21    7.29   0
  -9   7 -13  275.84    9.55   0
  -9   8 -13   69.50    8.52   0
  -9   9 -13   31.96    9.45   0
  -9  10 -13   -4.63    8.66   0
  -9  11 -13   61.57    8.59   0
  -9  18 -12   27.13   11.28   0
  -8 -18   3  233.67    8.85   0
  -8 -16  -1   -5.02    6.91   0
  -8 -10  -7  260.00    8.76   0
  -8  -1 -11   35.22    7.17   0
  -8   3 -12    2.79    5.79   0
  -7 -17   3   20.11    6.62   0
  -7 -15  -1    2.67    7.62   0
  -7 -10  -6    6.73    7.02   0
  -7  -7  -8  238.82    6.75   0
  -7  -5  -9    0.64    5.16   0
  -7  -2 -10  513.13    9.99   0
  -7   2 -11   20.30    7.03   0
  -6 -16  10   13.15    8.45   0
  -6 -15   1  194.74    7.74   0
  -6 -13  -2  191.57    8.27   0
  -6 -12  -3    0.32    6.72   0
  -6 -11  -4   40.05    6.79   0
  -6 -10  -5   28.37    4.87   0
  -6  -7  -7   20.32    5.03   0
  -6  -5  -8  467.50    7.80   0
  -6   1 -10   32.01    7.67   0
  -6  17 -10   48.95   13.37   0
  -5 -15   6   28.59    8.07   0
  -5 -15   8   16.04    7.35   0
  -5 -14   2    6.57    7.09   0
  -5 -13   0   10.54    6.95   0
  -5  -8  -5  547.37    9.91   0
  -5  -8  19   28.90    9.86   0
  -5   1  -9  117.16    7.93   0
  -5   8 -10   17.97    7.14   0
  -5   9 -10   15.40    8.75   0
  -5  10 -10   23.18    8.84   0
  -4 -12   1    8.83    6.53   0
  -4  -6  -5   54.93    5.51   0
  -4  -6  19    9.17   10.98   0
  -4  -4  -6 1117.58   12.97   0
  -4  -4  20   40.30   10.72   0
  -4  -2  -7    5.62    4.87   0
  -4  27  -3   21.75   11.62   0
  -4  28  -2   73.42    9.68   0
  -4  29  -1   36.90   12.21   0
  -3  -5  -4   89.09    7.32   0
  -3  -5  18    3.48    8.75   0
  -3  -3  19    5.12    8.46   0
  -3  -1  -6  255.03    8.52   0
  -3  29   2   18.82    9.44   0
  -2  -9   3  549.94   14.35   0
  -2  -7   0  169.28   10.84   0
  -2  -7  14   16.85    6.53   0
  -2  -6  15    5.26    7.15   0
  -2  -5  -2  169.12    9.42   0
  -2  -5  16    3.80    8.55   0
  -2   1  19  173.29   10.23   0
  -2   5  -6   60.55   11.10   0
  -2   5  20   59.71    9.07   0
  -2   6  20    8.26   10.01   0
  -2  20  -4    9.21    7.86   0
  -2  26   1    8.54    8.96   0
  -2  28   5   -5.30    8.22   0
  -2  28   6   -1.36   10.31   0
  -2  28   7    6.07   11.23   0
  -1  -5  13   -0.34    7.34   0
  -1  -4  14   37.83    7.06   0
  -1  -3  15   32.19    8.94   0
  -1   1  17   28.36    8.35   0
  -1   4  18   -1.64    9.05   0
  -1  13  18   57.88    7.75   0
  -1  14  18    9.87    9.91   0
  -1  17  17   37.62    8.57   0
  -1  19  16    2.64    7.90   0
  -1  21  15   43.22   11.51   0
  -1  22  14   18.02    8.24   0
  -1  23  13    2.35    7.84   0
  -1  24   2   29.82    7.83   0
  -1  24  12   14.23   10.82   0
  -1  25   4   16.30    8.65   0
  -1  25  10   13.64   10.00   0
   0  -3  11    1.53    6.60   0
   0   0  14  514.65   10.54   0
   0   2  15    7.18    6.93   0
   0   5  16    1.39    7.95   0
   0   6  16  146.41    6.68   0
   0  12  16   -0.72    6.10   0
   0  13  16   -6.04    8.78   0
   0  16  15  -17.29    9.33   0
   0  18  14  203.31    9.97   0
   0  19  13   41.15    6.14   0
   0  21  11   28.04    6.98   0
   0  22   4  316.96    9.89   0
   0  22   5    9.12    5.98   0
   0  22   9    4.35    5.91   0
   0  22  10  166.82    9.23   0
   1   0   6   -2.31    8.69   0
   1   0   7   -4.68    7.46   0
   1   0   8   -0.12    7.49   0
   1   1   4  181.47   12.63   0
   1   1  10  136.81    8.20   0
   1   2   3    2.82    8.34   0
   1   2  11   81.35    7.58   0
   1   6   1  157.04    9.83   0
   1   6  13   42.84    7.67   0
   1   7  13  128.17    6.12   0
   1  11  13  112.06    6.30   0
   1  12  13  119.19    8.31   0
   1  13   1  165.19    8.35   0
   1  13  13   89.33    7.76   0
   1  14  12   -3.31    5.65   0
   1  15   2    1.58    7.05   0
   1  15  12   -0.84    7.92   0
   1  16   3   58.40    5.72   0
   1  16  11  109.05    8.19   0
   1  17   4  172.34    6.39   0
   1  17  10   18.95    7.71   0
   1  18   5   46.97    7.76   0
   1  18   6   55.78    5.45   0
   1  18   7   83.20    5.67   0
   1  18   8   84.28    7.16   0
   1  18   9   47.78    7.76   0
 -14 -19  -2   88.96   11.50   0
 -14 -12  -9   20.15    6.62   0
 -14 -10 -10   -4.01    9.52   0
 -14  -8 -11    9.68    9.28   0
 -14  -6 -12    7.24    6.82   0
 -14  -3 -13    2.07    9.83   0
 -13 -18  -3    7.59    8.77   0
 -13 -14  -7  -12.88    8.64   0
 -13 -13  -8   30.79    6.63   0
 -13  -5 -12   12.27    9.30   0
 -13  -2 -13   16.97    9.82   0
 -13   2 -14   19.51    7.25   0
 -13   3 -14   12.59   11.14   0
 -12 -21   5   -4.56    9.77   0
 -12 -21   6   10.88   11.14   0
 -12 -12  -8   22.40    7.73   0
 -12  -9 -10   15.69    6.37   0
 -12  -7 -11   -2.58    6.61   0
 -12  -4 -12   13.67    8.80   0
 -12  -1 -13   18.45    8.11   0
 -12   5 -14    9.01   10.02   0
 -11 -20   3   76.69    8.74   0
 -11 -17  -3   -1.83    5.61   0
 -11 -16  -4  186.05    8.47   0
 -11 -15  -5    0.75    8.01   0
 -11 -14  -6    3.03    7.43   0
 -11 -13  -7   44.84    6.06   0
 -11 -10  -9   27.70    5.96   0
 -11  -8 -10  158.58    7.95   0
 -11  -6 -11   20.57    5.67   0
 -11  -3 -12   10.25    7.30   0
 -11   1 -13    0.05    8.97   0
 -10 -20   7   16.20    7.57   0
 -10 -20   8   15.63    8.01   0
 -10 -19   2  250.75    9.17   0
 -10 -17  -2   81.21    5.49   0
 -10 -12  -7    6.65    7.16   0
 -10  -9  -9    1.27    6.01   0
 -10  -7 -10    6.59    5.89   0
 -10   3 -13   52.41    6.18   0
 -10   4 -13    0.09    8.23   0
 -10  15 -13   -0.29   10.79   0
  -9 -19   5   27.36    7.44   0
  -9 -16  -2   11.21    7.02   0
  -9 -11  -7   59.76    4.99   0
  -9  -3 -11  323.94    7.69   0
  -8 -18   4   60.74    8.68   0
  -8 -18  10   44.28    9.93   0
  -8 -17   1  133.97    7.37   0
  -8 -17  13   10.51   12.21   0
  -8 -11  -6   11.92    7.36   0
  -8  -8  -8   68.89    7.92   0
  -8  -6  -9   17.52    7.89   0
  -8  -4 -10  199.90    6.43   0
  -8   4 -12  179.37    8.00   0
  -8   5 -12   29.50    7.56   0
  -8  14 -12   77.62   11.56   0
  -7 -17  10   78.56    9.32   0
  -7 -16   1    6.95    6.37   0
  -7 -16  13    6.27   11.16   0
  -7 -14  -2   -0.84    6.87   0
  -7 -11  -5   75.29    7.17   0
  -7  16 -11    5.79   11.02   0
  -6  -2  -9   -0.18    7.29   0
  -5 -15   7  206.74    8.83   0
  -5 -12  -1  117.82    7.46   0
  -5  -9  -4   20.57    7.23   0
  -5  -2  -8   11.12    6.54   0
  -5  25  -6    1.37   10.30   0
  -5  28  -4   14.93   13.68   0
  -4 -13   4   12.43    7.49   0
  -4   2  -8  107.35    8.34   0
  -4  26  -4    0.52    9.80   0
  -3 -10   1  202.92    7.68   0
  -3  -3  -5  212.92    8.42   0
  -3  -1  20   17.01    9.67   0
  -3   3  -7   40.66    7.94   0
  -3  25  -3    6.83    9.65   0
  -3  26  -2  103.20    9.18   0
  -3  27  -1    3.74    8.50   0
  -3  28   0    0.36    9.91   0
  -2  -8  13   -1.27    7.21   0
  -2  -6  -1    5.69    7.48   0
  -2  -2  18   -1.49    8.78   0
  -2   0  19    4.22    8.08   0
  -2   1  -5  849.53   16.23   0
  -2   4  20    7.17    9.54   0
  -2  14  -6   18.88   13.16   0
  -2  22  -3   12.01    7.99   0
  -2  27   2   26.87    8.65   0
  -2  28   4    0.95   10.19   0
  -1  -7  10  142.25   10.14   0
  -1  -6  12   91.31    8.80   0
  -1   0  17    6.67    7.28   0
  -1   3  18   16.46    8.92   0
  -1   4  -4   25.04   15.61   0
  -1   9  19   -2.47    9.14   0
  -1  10  19   -6.57    8.89   0
  -1  11  19  -13.42    9.50   0
  -1  15  -4   12.10    8.26   0
  -1  15  18    7.91    8.17   0
  -1  18  -3   72.71    8.22   0
  -1  20  -2   88.90    7.80   0
  -1  25   3   99.44    9.42   0
  -1  25  11   84.04    8.20   0
  -1  26   5   13.16    8.59   0
  -1  26   6    9.08    9.11   0
  -1  26   7    1.85    7.26   0
  -1  26   8   22.37    9.87   0
  -1  26   9   18.49    9.72   0
   0   1  15    6.32    6.65   0
   0   4  16  238.28   10.15   0
   0  14  -2 1086.37   15.10   0
   0  14  16  107.43    7.17   0
   0  15  16   -5.16    8.67   0
   0  17  -1   88.41    7.61   0
   0  17  15    2.21    6.61   0
   0  19   0   -4.23    6.73   0
   0  19  14    0.69    9.09   0
   0  20   1   -2.46    6.75   0
   0  20  13    2.16    6.29   0
   0  21   2    4.58    6.70   0
   0  21  12    4.87    6.27   0
   0  22   3   -1.41    7.56   0
   0  22  11   13.78    8.81   0
   0  23   5   -1.46    7.05   0
   0  23   6   -2.07    8.20   0
   0  23   7    5.37    5.92   0
   0  23   8   -7.34    8.36   0
   0  23   9    4.59    8.94   0
   1   0   9    3.59    7.71   0
   1   3   2  563.56   16.67   0
   1   3  12  127.27    6.39   0
   1   4  13  127.61    8.09   0
   1   5   1   98.76   12.29   0
   1   5  13    2.55    5.28   0
   1   8  14    6.44    6.59   0
   1   9  14    6.72    7.41   0
   1  10  14  132.27    8.48   0
   1  11  14  120.09    8.22   0
   1  14   1   35.16    6.96   0
   1  14  13   31.17    8.01   0
   1  16   2    6.53    6.78   0
   1  16  12   20.88    7.92   0
   1  17   3  122.84    8.11   0
   1  17  11   92.88    6.84   0
   1  18   4   -9.13    7.57   0
   1  18  10   77.35    8.83   0
   1  19   6    6.36    6.84   0
   1  19   7   68.60    7.39   0
   1  19   8    2.84    7.60   0
   1  19   9   17.48    8.09   0
 -14 -18  -3    8.71    9.22   0
 -14 -14  -7    2.57    9.96   0
 -14  -5 -12   30.88    9.97   0
 -14  -2 -13   -4.02   11.44   0
 -13 -20   1    5.84    9.53   0
 -13 -19  -1   -1.46    8.52   0
 -13 -17  -4    6.23    7.40   0
 -13 -11  -9    8.70    6.83   0
 -13  -9 -10   -3.52    8.56   0
 -13  -1 -13    0.51    9.76   0
 -13   4 -14   -2.68   11.07   0
 -12 -20   2   15.09    8.47   0
 -12 -19   0   12.50    8.34   0
 -12 -18  -2    5.05    6.49   0
 -12 -13  -7    8.46    8.63   0
 -12 -10  -9  114.43    9.12   0
 -12  -6 -11   59.87    8.76   0
 -12   6 -14    3.63    7.98   0
 -12   7 -14   -0.02    9.59   0
 -12   8 -14   -9.90    9.97   0
 -11 -20   4   51.74    9.24   0
 -11 -19   1    4.57    8.55   0
 -11 -18  -1   -7.91    7.71   0
 -11 -11  -8    4.06    6.98   0
 -11  -5 -11    2.75    7.94   0
 -11   2 -13   46.71    8.93   0
 -10 -18   0   61.52    5.82   0
 -10 -15  -4  184.93    8.66   0
 -10 -14  -5   -1.63    7.45   0
 -10 -13  -6  197.76    7.09   0
 -10 -10  -8   35.19    7.53   0
 -10  -4 -11    6.37    7.99   0
 -10  -1 -12  145.45    6.81   0
 -10   5 -13   96.40    8.83   0
 -10  14 -13    5.55   11.31   0
  -9 -19   7    7.12    7.71   0
  -9 -19   8    6.38    7.48   0
  -9 -19   9    3.66    7.80   0
  -9 -18   2   11.63    8.36   0
  -9 -17   0  -16.53    8.24   0
  -9 -14  -4   37.47    6.75   0
  -9 -13  -5   65.66    6.80   0
  -9 -12  -6   -0.16    4.84   0
  -9  -9  -8    6.29    6.44   0
  -9  -7  -9  316.72    8.84   0
  -9  -5 -10  -10.25    6.15   0
  -9  -2 -11  130.26    8.29   0
  -9   2 -12   31.84    8.01   0
  -8 -15  -2   56.72    5.49   0
  -8 -14  -3  321.27    8.48   0
  -8 -13  -4  -11.88    7.45   0
  -8 -12  -5    4.18    7.24   0
  -8   0 -11  524.59    9.69   0
  -8   6 -12  110.93    8.48   0
  -8  13 -12    7.53    9.05   0
  -8  19 -11    1.48   14.35   0
  -7 -13  -3   28.61    5.30   0
  -7 -12  -4  157.63    5.98   0
  -7  -8  -7    4.95    5.01   0
  -7  -6  -8  264.93    8.39   0
  -7  -4  -9   17.95    5.24   0
  -7  -1 -10  143.08    8.00   0
  -7   3 -11   13.76    6.85   0
  -7  20 -10   50.75   18.01   0
  -6 -16   9   26.33    8.27   0
  -6 -15   2  110.56    8.00   0
  -6 -14   0   -0.58    6.55   0
  -6  -8  -6   74.29    5.44   0
  -6  -6  -7   18.99    6.95   0
  -6  -4  -8    5.80    6.88   0
  -6   2 -10    3.99    5.20   0
  -5 -11  -2   34.89    6.90   0
  -5 -10  -3   60.56    7.35   0
  -5  -6  -6    2.33    5.19   0
  -5  -4  -7   21.67    6.65   0
  -5   2  -9  244.00    8.82   0
  -5  21  -8   22.86   14.44   0
  -4 -11   0   43.76    7.39   0
  -4  -9  17   12.05   10.51   0
  -4  -7  -4    0.75    5.12   0
  -4  -1  -7   14.97    7.05   0
  -3  -9   0   -1.79    7.62   0
  -3  -6  -3   55.54    7.19   0
  -3  -4  19    1.92    9.92   0
  -3  -2  20   78.64    9.17   0
  -3  22  -5   48.53    9.08   0
  -2  -4  17    2.36    7.61   0
  -2   3  20   -8.33    8.14   0
  -2  18  -5   10.84    8.33   0
  -2  24  -2   31.55    8.91   0
  -2  26   0    9.93    9.33   0
  -2  27   1   24.67    7.90   0
  -2  28   3    6.72    9.65   0
  -1   2  18   11.85    9.13   0
  -1   6  19   14.67    9.79   0
  -1  22  -1  210.32    8.78   0
  -1  23   0  117.43    9.22   0
  -1  24   1    0.30    7.70   0
  -1  25   2   22.81    8.37   0
  -1  26   4   11.35    8.91   0
  -1  26  10   -0.49    8.20   0
   0  -4  10 1636.98   18.59   0
   0  -3  12   -2.51    6.37   0
   0  -2  13    0.27    7.74   0
   0  -1  14    6.34    6.67   0
   0   3  16   -0.20    8.61   0
   0   6  17   -0.76    7.03   0
   0   7  17    1.06    7.87   0
   0   8  17  -10.38    6.33   0
   0   9  17    2.79    6.08   0
   0  10  17    2.03    6.66   0
   0  11  17    8.80    6.46   0
   0  12  17   -0.01    8.78   0
   0  13  17   20.49    8.52   0
   0  15  -2    0.19    8.03   0
   0  16  16   -3.22    7.64   0
   0  18  15    3.00    7.27   0
   0  20  14    1.48    9.61   0
   0  21  13   -4.08    8.13   0
   0  22  12   74.62   11.22   0
   0  23   4   -2.30    7.49   0
   0  23  10    7.23    6.67   0
   0  23  11    0.25    8.81   0
   0  24   7   -4.52    7.74   0
   0  24   8  295.32    9.21   0
   1   0   5    0.46   10.34   0
   1   0  10    2.01    6.59   0
   1   1  11   52.61    7.53   0
   1   2  12  189.88    8.79   0
   1   6  14   39.08    7.79   0
   1   7  14   73.11    5.56   0
   1  12  14   31.29    6.21   0
   1  13  14    8.96    7.79   0
   1  14  14    9.12    7.13   0
   1  16  13   22.20    7.71   0
   1  18   3   68.48    6.88   0
   1  19   5   -3.31    5.31   0
   1  19  10    2.42    7.48   0
   1  20   7   41.58    7.16   0
   1  20   8   41.16    7.86   0
   2   8   6   20.97    6.76   0
   2   8   7    2.34    7.49   0
   2   8   8    8.16    6.85   0
   2   9   6   21.55    7.64   0
   2   9   7  533.61    9.89   0
   2   9   8   67.21    6.80   0
   2   9   9  599.59    9.44   0
   2  10   6   36.45    7.18   0
   2  10   7    3.63    4.63   0
   2  10   8    8.42    6.83   0
   2  10   9    0.78    6.57   0
   2  11   6    7.27    6.99   0
   2  11   7  177.12    8.00   0
   2  11   8   23.25    7.37   0
   2  12   7    2.86    6.17   0
   2  12   8   56.05    6.97   0
 -15 -14  -7   -4.03    9.85   0
 -15 -11  -9    5.02   11.49   0
 -14 -19  -1   -0.91   10.53   0
 -14 -17  -4   43.83    6.95   0
 -14 -16  -5   13.31    7.04   0
 -14 -15  -6   78.55    7.65   0
 -14 -11  -9    4.20    7.17   0
 -14  -9 -10  141.29   10.45   0
 -14  -7 -11    2.18    9.10   0
 -14  -1 -13    2.30   11.55   0
 -13 -18  -2   -2.85    9.72   0
 -13 -12  -8   68.86    6.99   0
 -13  -4 -12   -2.94    6.98   0
 -13   5 -14    0.83    9.59   0
 -13   6 -14   -0.04   11.28   0
 -12 -20   3   25.10    9.82   0
 -12 -17  -3   28.42    6.38   0
 -12 -16  -4   23.45    7.46   0
 -12 -15  -5   32.27    8.31   0
 -12 -14  -6   -9.64    7.87   0
 -12  -8 -10    1.96    6.36   0
 -12  -3 -12    0.47    7.95   0
 -12   1 -13   13.54    8.75   0
 -12   9 -14    1.48    7.91   0
 -12  10 -14   -1.34    9.71   0
 -11 -20   5   32.26    9.92   0
 -11 -17  -2   67.50    8.01   0
 -11 -12  -7   70.61    7.65   0
 -11  -9  -9   18.77    5.32   0
 -11  -7 -10   83.03    7.46   0
 -11  -2 -12  148.49    6.74   0
 -11   3 -13   13.67    8.42   0
 -10 -19   3   83.36    8.14   0
 -10 -17  -1  142.47    8.39   0
 -10  -8  -9   -6.45    7.03   0
 -10  -6 -10    2.79    5.64   0
 -10   0 -12  105.73    7.25   0
 -10   6 -13    2.31    8.99   0
 -10   7 -13   13.59    8.85   0
 -10  13 -13    0.24   11.18   0
  -9  17 -12    0.74   11.47   0
  -8 -18   7  203.67    9.75   0
  -8 -18   8   84.21    8.29   0
  -8 -18   9  176.02    9.50   0
  -8 -17   2   26.90    7.23   0
  -8 -16   0    6.40    6.43   0
  -8  -9  -7   18.58    7.38   0
  -8  -3 -10   31.90    5.48   0
  -8   7 -12    3.49    8.13   0
  -8   8 -12   49.57   10.14   0
  -8  12 -12   30.31    9.25   0
  -7 -17   6  198.34    8.94   0
  -7 -17   9   18.57    7.72   0
  -7 -16   2  452.52    9.14   0
  -7 -15   0   10.78    5.73   0
  -7  -9  -6   67.15    6.99   0
  -7   4 -11   43.55    7.28   0
  -6 -16   6   10.98    6.19   0
  -6 -16   7   11.69    6.13   0
  -6 -16   8    7.04    7.36   0
  -6 -13  -1   87.88    7.72   0
  -6  -9  -5  665.00    9.73   0
  -6  -1  -9  247.24    8.87   0
  -6   3 -10  131.73    8.40   0
  -5 -13   1   92.30    7.53   0
  -5  -1  -8   13.14    7.09   0
  -5  17  -9  275.32   23.29   0
  -5  27  -5   38.88   11.19   0
  -4 -13  10    1.56    9.83   0
  -4 -12   2   69.36    7.40   0
  -4 -10  -1  390.27    9.19   0
  -4 -10  16  175.18   13.32   0
  -4  -9  -2   11.26    7.17   0
  -4  -8  -3   37.29    5.39   0
  -4  -8  18  125.58   10.54   0
  -4  -5  -5   26.22    7.51   0
  -4  -5  20    4.05   10.62   0
  -4  23  -6    2.59    9.81   0
  -3  -9  15   -1.90    8.74   0
  -3  -8  -1    7.44    7.74   0
  -3  -8  16   48.48    9.38   0
  -3  -7  -2  880.56   12.52   0
  -3  -7  17    4.09    9.13   0
  -3   0  -6    1.12    7.56   0
  -3  24  -4   94.84    9.84   0
  -2  -3  -3 2783.67   23.27   0
  -2  -3  18    2.88    9.65   0
  -2  -1  -4  429.47   14.39   0
  -2  -1  19  193.97   10.29   0
  -2   2  20    5.22    7.80   0
  -2   6  -6   22.88   10.24   0
  -2  28   2    0.43    8.96   0
  -2  29   4  -10.32   10.20   0
  -2  29   5   62.27    8.61   0
  -1  -1  -2  169.01   13.69   0
  -1  -1  17   30.79    8.06   0
  -1   1  -3   61.57   12.44   0
  -1   1  18   10.56    9.20   0
  -1   4  19   36.48    8.18   0
  -1   5  19   15.69    6.70   0
  -1  26   3   66.50    9.02   0
  -1  27   5    0.97    9.06   0
  -1  27   6   19.42   10.08   0
  -1  27   7   -0.85    7.74   0
  -1  27   8   40.87    7.28   0
  -1  27   9    9.18   11.08   0
   0   0  15   -7.62    6.82   0
   0   2  16   53.92    8.48   0
   0   5  17    2.27    8.14   0
   0  14  17   -6.20    7.45   0
   0  15  17    5.07   10.10   0
   0  17  16  -13.56    7.44   0
   0  18  -1    2.39    7.22   0
   0  18  16   78.33    8.64   0
   0  19  15   -5.40    7.04   0
   0  20  15    3.57    8.88   0
   0  21   1  236.01    8.38   0
   0  21  14    4.49    9.20   0
   0  22   2  357.74    9.79   0
   0  22  13   -0.46   10.09   0
   0  23   3   14.93    7.99   0
   0  23  12    0.55    8.88   0
   0  24   5  -12.06    7.89   0
   0  24   6  365.24    8.50   0
   0  24   9    2.27    6.22   0
   0  24  10  211.39   10.87   0
   1   3  13  293.01    7.83   0
   1   5  14   -3.27    5.22   0
   1   8   0  100.26   10.39   0
   1   8  15   56.02    7.94   0
   1   9   0    5.39    8.31   0
   1   9  15    9.51    8.51   0
   1  10   0  609.63   12.86   0
   1  10  15   41.72    7.33   0
   1  11   0  701.63   12.65   0
   1  11  15  106.00    8.50   0
   1  12   0  960.09   13.59   0
   1  12  15  148.58    8.30   0
   1  15   1  120.26    6.14   0
   1  15  14   13.26    7.91   0
   1  17   2   19.08    5.29   0
   1  17  13   70.44    8.55   0
   1  18  12   13.53    5.50   0
   1  19   4    7.69    5.28   0
   1  19  11   37.09    6.10   0
   1  20   5   64.16    7.24   0
   1  20   6   78.08    5.55   0
   1  20   9   48.16    5.72   0
   1  20  10   88.01    8.69   0
   2   6   7   -2.93    6.93   0
   2   6   8   -1.62    7.37   0
   2   7   6   10.60    7.33   0
   2   7   7  135.71    6.14   0
   2   7   8   40.12    5.33   0
   2   7   9   12.20    6.62   0
   2   8   5    6.39    7.42   0
   2   8   9    2.73    4.74   0
   2   8  10   23.60    7.02   0
   2   9   5  868.20   11.66   0
   2   9  10   22.00    7.08   0
   2  10   5   12.50    7.87   0
   2  10  10    9.10    7.04   0
   2  11   5  213.42    8.52   0
   2  11   9  241.08    6.62   0
   2  11  10    4.57    6.78   0
   2  12   5   -0.67    6.34   0
   2  12   6  109.05    5.58   0
   2  12   9   -2.15    5.18   0
   2  12  10   21.67    7.21   0
   2  13   6   12.45    6.86   0
   2  13   7  155.39    6.04   0
   2  13   8   25.78    5.45   0
   2  13   9  364.14    8.87   0
   2  14   7    9.47    6.91   0
   2  14   8   -9.29    6.64   0
 -15  -9 -10   -3.01    9.55   0
 -14 -18  -2   -1.58    9.78   0
 -14 -12  -8   -6.89    7.64   0
 -14  -4 -12    1.93    8.69   0
 -13 -20   2   -4.17    7.18   0
 -13 -19   0    2.57    9.04   0
 -13 -17  -3   39.87    8.22   0
 -13 -16  -4    1.41    8.36   0
 -13 -15  -5   80.68    9.01   0
 -13 -14  -6    8.39    8.80   0
 -13 -13  -7   14.88    6.93   0
 -13 -10  -9    3.31    7.18   0
 -13  -8 -10   -1.98    8.95   0
 -13  -6 -11    4.56    6.44   0
 -13  -3 -12   61.84    9.61   0
 -13   0 -13    0.86    7.22   0
 -13   7 -14   32.01   10.81   0
 -12 -20   4   13.17   10.14   0
 -12 -19   1   15.87    8.89   0
 -12 -18  -1  116.38    8.78   0
 -12 -11  -8   13.28    5.79   0
 -12  -5 -11   31.49    8.46   0
 -12  -2 -12   13.73    8.69   0
 -12   2 -13    8.88    8.90   0
 -11 -20   8    9.04    9.15   0
 -11 -19   2   17.32    7.68   0
 -11 -18   0  125.44    8.85   0
 -11 -16  -3   29.55    7.23   0
 -11 -15  -4   39.82    8.15   0
 -11 -14  -5    4.30    7.34   0
 -11 -13  -6    7.65    5.43   0
 -11 -10  -8    2.59    7.68   0
 -11  -4 -11   23.83    7.76   0
 -11  -1 -12   11.97    7.30   0
 -11   4 -13   17.63    8.89   0
 -10 -19   4  156.69    9.80   0
 -10 -19  11    2.57   11.73   0
 -10 -18   1    2.00    5.61   0
 -10 -16  -2    6.06    8.26   0
 -10 -12  -6    5.85    7.37   0
 -10 -11  -7    1.79    5.52   0
 -10  -3 -11   79.04    6.62   0
 -10   1 -12  155.40    8.44   0
 -10   8 -13    0.85    8.50   0
 -10   9 -13   -6.52    8.89   0
 -10  10 -13   15.64    9.57   0
 -10  11 -13   11.23    8.77   0
 -10  12 -13    4.85    9.03   0
  -9 -18   3   29.89    7.09   0
  -9 -18  12   16.54   10.40   0
  -9 -16  -1  434.14    8.92   0
  -9 -10  -7    4.51    4.66   0
  -9  -8  -8   60.01    6.99   0
  -9  -4 -10   19.91    6.70   0
  -9  -1 -11  232.97    9.05   0
  -9   3 -12   36.86    5.98   0
  -8 -15  -1    4.71    6.77   0
  -8 -10  -6   41.93    7.28   0
  -8  -7  -8   26.43    5.72   0
  -8  -5  -9   10.83    5.81   0
  -8  -2 -10    1.35    7.28   0
  -8   1 -11   16.91    5.25   0
  -8   9 -12    4.06    8.11   0
  -8  10 -12   58.41    8.28   0
  -8  11 -12   12.63    7.85   0
  -7 -17   7   28.74    7.37   0
  -7 -17   8  142.56    8.64   0
  -7 -14  -1  105.20    7.73   0
  -7 -10  -5   46.78    7.02   0
  -7  -3  -9   -5.69    6.71   0
  -7   0 -10    4.46    6.61   0
  -7   5 -11   10.76    7.04   0
  -7  15 -11    9.33    9.43   0
  -6 -15   3  329.78    9.28   0
  -6 -12  -2   58.69    7.10   0
  -6 -11  -3    8.88    6.60   0
  -6 -10  -4   10.25    4.73   0
  -5  -7  -5 1205.77   11.71   0
  -5   3  -9  615.42   11.41   0
  -4 -13   5   97.05    7.61   0
  -4  -3  -6   20.86    5.29   0
  -4   3  -8    6.81    6.83   0
  -4  25  -5   42.83    9.45   0
  -4  28  -3  126.51   11.33   0
  -4  29  -2   -7.60   10.90   0
  -3 -11   4  291.45   10.33   0
  -3  -6  18  134.65   10.86   0
  -3  -4  -4    8.48    9.41   0
  -3  -2  -5  228.79   10.13   0
  -3   4  -7   72.93    8.31   0
  -3  20  -6  214.09   12.63   0
  -3  27  -2    6.71    9.40   0
  -3  28  -1    4.98    9.99   0
  -3  29   0   24.11    8.84   0
  -2  -9   4    9.43    9.13   0
  -2   1  20   28.30   10.83   0
  -2  21  -4    1.76    7.35   0
  -2  23  -3  519.93   12.06   0
  -2  29   3   39.97    9.35   0
  -1  -5  14    4.16    6.42   0
  -1  -4  15   25.82    7.14   0
  -1  -3  16   79.30    8.26   0
  -1   3  19   79.58    9.37   0
  -1   8  20    5.71    9.90   0
  -1   9  20   18.82   11.26   0
  -1  16  -4   24.09    7.00   0
  -1  19  -3    1.18    7.38   0
  -1  21  -2  111.56    7.73   0
  -1  24   0   97.71    8.31   0
  -1  25   1  143.03    8.87   0
  -1  27   4   46.11    9.01   0
   0  -4  11   -0.32    6.52   0
   0   1  16    9.99    7.20   0
   0   4  17    0.20    5.76   0
   0   8  18    1.15    8.85   0
   0   9  18    0.34    8.73   0
   0  10  18  205.72    9.94   0
   0  11  18    4.16   10.07   0
   0  12  18   -8.93   10.14   0
   0  13  18    5.77    8.91   0
   0  16  -2   37.21    7.20   0
   0  16  17    7.42    7.06   0
   0  17  17    3.86    9.85   0
   0  19  16   13.56   11.16   0
   0  20   0   32.53    5.34   0
   0  22  14  141.81   10.35   0
   0  23  13   25.66    9.38   0
   0  24   4  366.02    9.87   0
   0  24  11    2.08    7.48   0
   0  25   6    4.16    8.10   0
   0  25   7   50.74    9.43   0
   0  25   8   -3.71    8.72   0
   0  25   9   73.65    9.40   0
   1  -1   7   49.41    8.67   0
   1  -1   8   18.16    7.43   0
   1  -1   9  203.39    9.40   0
   1   0  11    2.63    7.08   0
   1   1   3   66.54   12.54   0
   1   1  12   56.86    5.81   0
   1   2  13  165.17    8.99   0
   1   4   1  165.49   13.46   0
   1   4  14   19.43    5.47   0
   1   6  15   28.31    8.12   0
   1   7  15  132.76    6.74   0
   1  13   0  416.66   10.85   0
   1  13  15   32.33    6.07   0
   1  14  15   25.55    8.57   0
   1  16   1   91.82    7.70   0
   1  16  14   17.70    6.56   0
   1  17  14   70.51    7.84   0
   1  18   2   56.32    7.47   0
   1  18  13   12.57    5.82   0
   1  19   3    9.33    6.75   0
   1  19  12   -0.34    6.53   0
   1  20   4   92.00    7.51   0
   1  20  11   20.61    6.96   0
   1  21   6  161.06    8.77   0
   1  21   7   97.92    6.47   0
   1  21   8   62.83    6.02   0
   1  21   9  150.74    8.97   0
   1  21  10   56.22    7.82   0
   2   5   7  616.60   11.07   0
   2   5   8  189.54    8.81   0
   2   6   6   19.31    5.73   0
   2   6   9   26.62    4.89   0
   2   6  10    5.00    6.52   0
   2   7   5   61.63    8.80   0
   2   7  10    1.03    5.09   0
   2   8  11    7.10    7.06   0
   2   9   4   10.08    7.25   0
   2   9  11  607.24    9.95   0
   2  10   4    9.49    7.22   0
   2  10  11   -7.93    7.79   0
   2  11   4   35.42    7.71   0
   2  11  11   59.81    7.71   0
   2  12  11   13.67    6.72   0
   2  13   5  380.10    9.11   0
   2  13  10   19.00    5.27   0
   2  14   5    6.05    6.32   0
   2  14   6   21.06    5.03   0
   2  14   9    1.55    5.68   0
   2  14  10   47.17    6.92   0
   2  15   6   22.47    6.53   0
   2  15   7  432.08    9.13   0
   2  15   8   16.49    7.46   0
 -15 -13  -7   15.56   11.11   0
 -15 -12  -8   58.84    8.09   0
 -15 -10  -9   46.15   11.42   0
 -14 -17  -3    7.50    8.13   0
 -14 -16  -4  -24.32    9.59   0
 -14 -15  -5   13.15    9.38   0
 -14 -14  -6   -1.96   10.07   0
 -14 -13  -7   15.52    7.22   0
 -14 -10  -9   -6.48    7.76   0
 -14  -8 -10   13.24    9.70   0
 -14  -6 -11   -6.51    8.97   0
 -14  -3 -12    0.67    9.45   0
 -14   0 -13    2.07    8.29   0
 -13 -20   3    5.14    9.08   0
 -13 -18  -1    8.32    9.77   0
 -13 -11  -8  193.90    9.15   0
 -13   1 -13   20.13    9.23   0
 -12 -20   5   79.73    9.81   0
 -12 -17  -2   44.04    8.02   0
 -12 -12  -7    0.84    5.93   0
 -12  -9  -9   24.93    5.92   0
 -12  -7 -10    6.07    6.01   0
 -12   3 -13   11.32    8.70   0
 -11 -19   3   -3.41    7.96   0
 -11 -17  -1   24.60    7.67   0
 -11  -8  -9   53.63    8.07   0
 -11  -6 -10  229.22    8.16   0
 -11   0 -12  -10.49    7.87   0
 -11   5 -13   14.79    9.05   0
 -10 -19   5   43.45    8.43   0
 -10 -18   2   87.30    8.08   0
 -10 -17   0  158.09    8.19   0
 -10 -15  -3    5.21    6.86   0
 -10 -14  -4   21.85    7.59   0
 -10 -13  -5   20.40    6.72   0
 -10  -9  -8  358.22    7.08   0
 -10  -7  -9    7.80    7.11   0
 -10  -5 -10  598.44    8.71   0
 -10  -2 -11   33.78    8.15   0
  -9 -18   4   -1.87    7.30   0
  -9 -17   1  374.57    8.28   0
  -9 -15  -2    6.39    5.87   0
  -9 -12  -5   21.38    6.69   0
  -9 -11  -6    9.06    4.96   0
  -9  -6  -9  148.35    5.81   0
  -9   4 -12   16.23    8.07   0
  -9  16 -12    8.72   11.19   0
  -8 -17   3   -0.97    6.70   0
  -8 -16   1    1.97    6.74   0
  -8 -14  -2  108.11    8.01   0
  -8 -11  -5   22.14    6.87   0
  -8   2 -11   11.30    6.71   0
  -7 -16   3   22.12    6.96   0
  -7 -15   1    5.41    7.51   0
  -7 -13  -2   89.39    7.53   0
  -7 -12  -3   30.80    7.20   0
  -7 -11  -4   64.74    7.11   0
  -7  -7  -7    8.18    5.03   0
  -7  -5  -8   54.31    5.27   0
  -7   6 -11   44.25    7.24   0
  -6 -14   1   27.63    6.84   0
  -6  -7  -6   71.95    5.10   0
  -6  -5  -7  750.10   10.41   0
  -6  -3  -8  306.22    7.27   0
  -6   0  -9   12.41    7.68   0
  -6   4 -10   -2.88    6.53   0
  -5 -12   0   -0.23    6.12   0
  -5 -11  17   62.27   13.08   0
  -5 -10  18   25.77   12.81   0
  -5  -9  19    3.30   13.92   0
  -5  -8  -4   44.14    7.64   0
  -5  -5  -6   20.44    7.05   0
  -5  -3  -7  398.80    8.08   0
  -4 -13   6    6.28    7.66   0
  -4  -7  19    0.76    9.53   0
  -4   0  -7  468.57   10.30   0
  -4  21  -7   18.44   11.06   0
  -4  27  -4    9.07   11.38   0
  -3  -3  20   52.72    9.38   0
  -3  26  -3   18.01    9.52   0
  -2  -7  15    9.35    8.34   0
  -2  -6  16    2.75    6.84   0
  -2  -5  17  104.31    9.10   0
  -2  -2  19    0.76    7.73   0
  -2   0  20   23.40    9.31   0
  -2   2  -5    6.37    9.37   0
  -2  26  -1    1.61    9.28   0
  -2  27   0   34.89    9.10   0
  -2  28   1    3.72   10.18   0
  -1  -7  11  302.27   11.93   0
  -1  -6  13   45.33    8.26   0
  -1  -2  17   16.43    7.02   0
  -1   0  18   -5.03    8.89   0
  -1   2  19   90.05    8.60   0
  -1   6  20    9.01   10.04   0
  -1   7  20    0.04    7.36   0
  -1  23  -1    4.45    8.71   0
  -1  26   2   25.37    7.02   0
  -1  27   3    0.36    7.69   0
  -1  28   5   -6.41    8.95   0
  -1  28   6   -1.51   10.01   0
  -1  28   7   -2.96    7.88   0
   0  -3  13    3.52    7.84   0
   0  -2  14  301.78    9.03   0
   0  -1  15    7.93    6.50   0
   0   3  17   -5.32    5.67   0
   0   6  18  133.94    9.33   0
   0   7  18    1.47    6.02   0
   0  14  18  169.54    8.29   0
   0  15  18   -0.57   10.94   0
   0  19  -1   -1.93    7.57   0
   0  21  15   14.21    7.87   0
   0  22   1    2.27    7.27   0
   0  23   2    2.48    8.36   0
   0  24   3    0.88    7.64   0
   0  24  12  188.77    8.76   0
   0  25   5   49.92    8.95   0
   0  25  10    4.64    7.53   0
   0  25  11   35.48    9.52   0
   1  -1   6   22.92    8.82   0
   1  -1  10  142.27    8.33   0
   1   0   4   -0.41   11.01   0
   1   3  14   47.46    5.70   0
   1   5  15   12.97    7.27   0
   1   7   0   56.86    8.31   0
   1   8  16   10.01    7.30   0
   1   9  16    8.27    8.10   0
   1  10  16   13.50    7.71   0
   1  11  16   24.09    8.40   0
   1  12  16   22.65    7.19   0
   1  14   0   -1.30    6.98   0
   1  15  15   34.60    6.65   0
   1  16  15   21.11    9.33   0
   1  17   1   56.26    7.88   0
   1  18  14   -4.88    9.12   0
   1  19  13   50.74    6.05   0
   1  20   3    4.81    6.37   0
   1  20  12   89.58    6.61   0
   1  21   5   88.04    6.23   0
   1  21  11   85.76    9.23   0
   1  22   6   64.16    7.41   0
   1  22   7  138.02    8.88   0
   1  22   8    1.15    7.54   0
   1  22   9  102.96    8.78   0
   2   5   6   58.22    8.89   0
   2   5   9  369.74    7.74   0
   2   5  10  333.43    8.92   0
   2   6   5   -6.66    8.85   0
   2   6  11   12.10    6.89   0
   2   7  11   16.69    5.22   0
   2   8   4    1.39    8.39   0
   2   8  12    5.78    7.10   0
   2   9  12    4.85    7.01   0
   2  10  12   -7.98    7.01   0
   2  11  12   14.12    7.27   0
   2  12   4   39.61    5.35   0
   2  12  12   22.30    6.54   0
   2  13   4   63.57    7.13   0
   2  13  11  336.17    7.10   0
   2  14  11   15.93    6.54   0
   2  15   5  367.99    9.34   0
   2  15  10   47.97    4.90   0
   2  15  11  161.31    7.36   0
   2  16   6   36.34    7.24   0
   2  16   7   18.57    5.81   0
   2  16   8   49.01    5.40   0
   2  16   9   25.47    7.17   0
   2  16  10   24.74    7.08   0
 -15 -16  -4    2.06    9.54   0
 -15 -15  -5   -0.62   10.62   0
 -15 -14  -6   -3.68    9.77   0
 -15  -8 -10   13.34    8.49   0
 -15  -6 -11   23.05    8.09   0
 -14 -18  -1   15.68    9.43   0
 -14 -11  -8   19.62    8.94   0
 -14   1 -13   22.74   10.00   0
 -13 -20   4   -1.89   10.59   0
 -13 -19   1   -0.12    6.91   0
 -13 -17  -2   59.77    8.60   0
 -13 -12  -7   -3.62    8.14   0
 -13  -9  -9   18.89    7.45   0
 -13  -7 -10   56.26    9.01   0
 -13  -5 -11   -4.01    6.72   0
 -13  -2 -12   37.09    7.79   0
 -13   2 -13   26.59    8.58   0
 -12 -20   6   12.07    9.68   0
 -12 -19   2    3.27    7.41   0
 -12 -18   0    9.31    7.90   0
 -12 -16  -3   -0.75    6.50   0
 -12 -15  -4   24.74    7.91   0
 -12 -14  -5  256.85    8.37   0
 -12 -13  -6   24.61    5.55   0
 -12 -10  -8    6.02    7.43   0
 -12  -4 -11  161.06    8.41   0
 -12  -1 -12    2.77    8.29   0
 -12   4 -13   72.01    9.36   0
 -11 -18   1    3.16    8.01   0
 -11 -16  -2  216.94    8.57   0
 -11 -11  -7   15.94    5.49   0
 -11  -3 -11   54.40    7.33   0
 -11   6 -13    8.48    7.74   0
 -11   7 -13    1.85    8.98   0
 -11  15 -13   -1.64   10.02   0
 -10 -19   9   36.86   10.58   0
 -10 -10  -7   17.76    7.59   0
 -10   2 -12   -3.54    5.74   0
  -9 -16   0    5.76    7.10   0
  -9 -14  -3    7.84    4.93   0
  -9 -13  -4   38.57    5.07   0
  -9  -9  -7   73.00    7.00   0
  -9  -3 -10   15.31    6.59   0
  -9   0 -11    1.57    5.52   0
  -9   5 -12    6.76    7.93   0
  -8 -17   4   22.83    7.53   0
  -8 -17  12    9.97    8.53   0
  -8 -13  -3    4.44    5.80   0
  -8 -12  -4  108.65    6.43   0
  -8  -8  -7   65.87    5.70   0
  -8  -6  -8  314.35    8.31   0
  -8  -4  -9  300.74    9.06   0
  -8  -1 -10   10.41    7.40   0
  -7  -8  -6  586.39    9.87   0
  -7  -2  -9    5.36    7.40   0
  -7   1 -10  124.78    6.34   0
  -7   7 -11   33.63    7.40   0
  -7  14 -11   52.22    9.03   0
  -6 -15  12   61.69   10.17   0
  -6  -8  -5   16.72    6.55   0
  -6   5 -10  250.40    9.16   0
  -6  16 -10   17.46   10.38   0
  -6  26  -7    5.09   13.73   0
  -5 -13   2  159.07    7.84   0
  -5 -11  -1  171.46    8.18   0
  -5 -10  -2   98.90    7.82   0
  -5  -9  -3   12.52    7.27   0
  -5   0  -8    4.80    4.92   0
  -5   4  -9  161.36    8.43   0
  -5  26  -6   -2.19   12.62   0
  -4 -13   9   14.60   10.31   0
  -4 -11   1   14.04    7.00   0
  -4 -11  15   11.42   11.50   0
  -4  -6  -4  270.07    7.84   0
  -4  -6  20   30.69   11.84   0
  -4   4  -8  121.08    8.25   0
  -3  -5  -3   60.71    9.87   0
  -3  -5  19    0.14    9.10   0
  -3   1  -6  248.50    9.88   0
  -3   5  -7   21.85    8.89   0
  -2  -9  12    8.78    9.55   0
  -2  -4  -2    8.85    7.75   0
  -2  -4  18    3.98    9.27   0
  -2   7  -6   10.44   11.09   0
  -2  15  -6   30.62   11.76   0
  -2  19  -5  283.01   11.55   0
  -2  25  -2    7.03    8.72   0
  -2  29   2   43.59    9.96   0
  -1   5  20  -12.24    9.64   0
  -1  17  -4  152.85    9.94   0
  -1  20  -3    1.43    8.02   0
  -1  22  -2    5.66    7.39   0
  -1  26   1   40.70    8.03   0
  -1  28   4    2.86    8.99   0
   0  -5   8    0.36    8.10   0
   0  -4  12  436.10   11.82   0
   0   0  16   88.24    8.67   0
   0   2  17   -0.32    7.65   0
   0   4  18  171.00    9.19   0
   0   5  18   -5.53    6.59   0
   0  10  19  -12.09    8.69   0
   0  11  19   12.81    8.87   0
   0  17  -2    3.43    7.36   0
   0  21   0  -11.47    6.86   0
   0  25   4    0.54    8.48   0
   0  26   6   -3.89    7.93   0
   0  26   7    4.23    9.44   0
   0  26   8   12.00    9.83   0
   0  26   9  -12.89    9.22   0
   0  26  10   -2.10    9.76   0
   1   0  12    1.63    7.36   0
   1   1  13   66.23    6.30   0
   1   2   2  387.19   13.42   0
   1   2  14   42.37    6.92   0
   1   4  15   31.34    7.37   0
   1   6  16   34.17    7.18   0
   1   7  16   83.86    7.69   0
   1  13  16   66.52    6.76   0
   1  14  16    4.92    6.98   0
   1  15   0    8.22    6.80   0
   1  15  16   -1.57    7.74   0
   1  17  15   36.65    6.82   0
   1  19   2   38.06    5.55   0
   1  19  14    1.88    9.17   0
   1  20  13   53.82    6.82   0
   1  21   4  174.30    6.43   0
   1  21  12  110.30    6.85   0
   1  22   5  143.65    9.11   0
   1  22  10    8.62    6.17   0
   1  22  11   67.13    9.22   0
   1  23   8   59.87    7.75   0
   2   4   7    3.21    5.16   0
   2   4   8   11.56    5.02   0
   2   4   9   -4.21    4.97   0
   2   4  10    6.32    6.60   0
   2   5   5  483.48   11.80   0
   2   5  11  567.05   10.32   0
   2   7   4  112.58    7.25   0
   2   7  12   63.53    8.43   0
   2   9  13  340.07    8.32   0
   2  10   3   25.16    7.63   0
   2  10  13    1.99    6.13   0
   2  11   3  492.02   10.01   0
   2  11  13   42.18    7.15   0
   2  12  13    9.04    6.91   0
   2  13  12   10.08    5.20   0
   2  14   4    0.08    4.91   0
   2  14  12   -0.39    7.69   0
   2  15   4   34.78    6.98   0
   2  15  12   31.43    8.20   0
   2  16   5   -0.72    6.84   0
   2  16  11   24.23    7.90   0
   2  17   6   67.86    7.58   0
   2  17   7  102.16    5.59   0
   2  17   8   27.14    5.22   0
   2  17   9   90.61    5.40   0
   2  17  10   -8.29    7.63   0
 -15 -11  -8   14.53    7.13   0
 -15  -9  -9   25.49    9.58   0
 -15  -5 -11    3.51   11.19   0
 -14 -19   1    0.37    8.05   0
 -14 -17  -2   10.78   10.00   0
 -14 -12  -7   17.46    8.70   0
 -14  -9  -9   14.51    8.41   0
 -14  -7 -10    0.59    9.01   0
 -14  -5 -11    4.43    7.43   0
 -14  -2 -12   16.12    8.98   0
 -14   2 -13    4.49    9.86   0
 -13 -19   2   10.25   10.41   0
 -13 -18   0    6.06    9.65   0
 -13 -16  -3   45.45    7.97   0
 -13 -15  -4   69.30    9.37   0
 -13 -14  -5   17.40    8.25   0
 -13 -13  -6   49.82    6.49   0
 -13 -10  -8   10.18    8.66   0
 -13  -4 -11    6.92    8.92   0
 -13  -1 -12   44.08    8.52   0
 -13   3 -13   57.55    8.99   0
 -12 -20   7   30.41    9.59   0
 -12 -19   3   39.66    8.84   0
 -12 -17  -1    8.80    8.60   0
 -12 -11  -7   -1.61    7.96   0
 -12  -8  -9   66.38    6.00   0
 -12  -6 -10   11.16    5.68   0
 -12   0 -12   21.78    9.17   0
 -12   5 -13   14.54    9.07   0
 -11 -19   4    4.20    8.38   0
 -11 -15  -3   39.04    7.38   0
 -11 -14  -4    0.74    7.42   0
 -11 -13  -5   74.98    8.05   0
 -11 -12  -6  209.46    6.93   0
 -11  -9  -8   26.45    6.10   0
 -11  -7  -9   18.58    7.59   0
 -11  -5 -10   55.89    7.53   0
 -11   1 -12   13.58    6.83   0
 -11   8 -13    6.96    9.22   0
 -11   9 -13   -8.14    8.60   0
 -11  12 -13   83.32   11.95   0
 -11  13 -13   40.26   10.28   0
 -11  14 -13   -2.60    9.31   0
 -10 -19   8  176.63    9.09   0
 -10 -18   3    5.53    7.76   0
 -10 -16  -1   75.02    8.22   0
 -10 -11  -6   15.79    6.98   0
 -10  -8  -8    2.82    6.81   0
 -10  -6  -9    3.86    7.76   0
 -10  -4 -10   25.20    5.52   0
 -10  -1 -11    4.46    7.56   0
 -10   3 -12  174.07    7.79   0
  -9 -18   5   59.15    7.25   0
  -9 -18  11    8.39    8.67   0
  -9 -17   2   13.81    7.46   0
  -9  -7  -8   54.92    6.54   0
  -9  -5  -9  117.79    7.01   0
  -9   1 -11  220.76    9.11   0
  -9   6 -12   17.35    7.52   0
  -9   7 -12    4.27    7.68   0
  -9  15 -12   19.00   10.23   0
  -8 -15   0  114.04    7.73   0
  -8  -9  -6   14.54    6.64   0
  -8   3 -11    7.69    5.22   0
  -8  18 -11  131.08   13.42   0
  -7 -16   4  396.28    8.90   0
  -7 -16  12  188.31   12.77   0
  -7 -14   0   -1.06    7.02   0
  -7  -6  -7   20.97    7.04   0
  -7  -4  -8   81.24    7.49   0
  -7   2 -10  504.04   10.12   0
  -7   8 -11   -0.38    6.25   0
  -7   9 -11   23.31    7.35   0
  -7  10 -11   28.46    8.81   0
  -7  12 -11   13.20    9.41   0
  -7  13 -11   12.99    9.25   0
  -6 -14   2   40.05    7.43   0
  -6 -13   0   93.14    5.92   0
  -6  -9  -4  232.91    7.83   0
  -6  -2  -8   15.57    6.98   0
  -6   1  -9  227.58    8.99   0
  -6   6 -10    6.22    7.37   0
  -5 -14   5   45.79    6.98   0
  -5 -14  11   11.26   10.42   0
  -5  -6  -5  616.62   10.36   0
  -5   5  -9    7.75    8.12   0
  -5  24  -7   35.45   11.72   0
  -4 -13   7   14.55    6.53   0
  -4 -13   8    0.85    8.18   0
  -4 -10   0  112.54    7.98   0
  -4  -7  -3   27.68    8.28   0
  -4  -4  -5  824.95   12.80   0
  -4  -2  -6  100.32    8.16   0
  -3 -11   5  223.91   10.48   0
  -3 -10  14   40.70   10.96   0
  -3  -9   1  373.98   11.05   0
  -3  23  -5    8.64    8.15   0
  -3  25  -4   26.45    8.66   0
  -3  28  -2    2.96    9.45   0
  -3  29  -1   34.09   10.65   0
  -2  -8  14    1.83    8.18   0
  -2  -5  -1  689.73   15.61   0
  -2  -1  20   23.08    9.71   0
  -2  22  -4   34.23    9.96   0
  -2  24  -3    7.80    9.08   0
  -1  -7   5  222.23   23.60   0
  -1  -1  18   14.97    9.11   0
  -1   1  19   59.37    9.17   0
  -1   4  20    0.82    7.70   0
  -1  24  -1   -5.57    7.00   0
  -1  25   0    3.17    7.85   0
  -1  27   2   26.47    8.63   0
   0  -5   7    0.66    9.11   0
   0  -5   9    6.09    6.58   0
   0   1  17   17.85    7.10   0
   0   7  19   13.71    9.03   0
   0   8  19    9.05    9.95   0
   0   9  19   24.97    7.65   0
   0  10  -3    1.63    9.97   0
   0  11  -3  106.95    9.31   0
   0  12  -3   -3.68    9.09   0
   0  12  19   19.04    8.22   0
   0  13  19    9.51    8.47   0
   0  20  -1    0.15    6.90   0
   0  23   1   49.58    9.03   0
   0  24   2  383.36   10.26   0
   0  25   3   72.08    8.95   0
   0  26   5    6.36    8.66   0
   1  -1   5   34.07   10.39   0
   1  -1  11   64.77    7.43   0
   1   3  15   33.93    7.95   0
   1   5  16    3.92    8.04   0
   1   6   0    1.98   10.89   0
   1   9  17    2.01    7.98   0
   1  10  17   22.08    8.88   0
   1  11  17   66.66    9.21   0
   1  12  17   66.61    8.96   0
   1  13  17   27.01    8.00   0
   1  16   0    9.94    6.91   0
   1  16  16   38.15    7.14   0
   1  17  16   28.18    8.88   0
   1  18   1   82.99    5.95   0
   1  18  15   30.13    7.60   0
   1  19  15   10.95    9.02   0
   1  20   2   99.04    7.20   0
   1  20  14   55.83    7.55   0
   1  21   3  169.54    7.77   0
   1  21  13   59.61    7.84   0
   1  22   4   29.98    8.26   0
   1  22  12    6.03    9.59   0
   1  23   6   42.86    8.19   0
   1  23   7   10.34    5.83   0
   1  23   9   -2.18    6.59   0
   1  23  10   19.04    8.97   0
   1  23  11   -6.02    8.79   0
   2   3   8  107.07    7.71   0
   2   3   9  157.33    7.86   0
   2   4   6    3.93    6.15   0
   2   4  11    4.31    6.77   0
   2   5  12  215.18    8.00   0
   2   6   4   13.58    7.16   0
   2   6  12    6.42    5.11   0
   2   7  13   98.15    7.64   0
   2   8   3   -1.19    8.57   0
   2   8  13    1.89    5.10   0
   2   9   3  523.55    9.88   0
   2  12   3    2.86    5.23   0
   2  13   3  338.46    9.18   0
   2  13  13   72.60    5.79   0
   2  14   3   15.34    6.28   0
   2  14  13    5.44    7.87   0
   2  15  13  189.98    7.69   0
   2  16   4    4.99    7.22   0
   2  16  12   28.34    7.47   0
   2  17   5   65.15    8.36   0
   2  17  11  133.55    6.44   0
   2  18   6   13.80    7.36   0
   2  18   7    9.03    5.13   0
   2  18   8    8.78    4.96   0
   2  18   9   11.49    5.39   0
   2  18  10   22.22    8.40   0
 -15 -17  -2    7.68    9.75   0
 -15 -13  -6   -8.61    9.63   0
 -15 -12  -7  188.62    8.23   0
 -15  -7 -10    8.10    7.53   0
 -14 -19   2  126.95   11.94   0
 -14 -18   0  -12.86    9.72   0
 -14 -16  -3   19.72    8.92   0
 -14 -15  -4  140.83   10.40   0
 -14 -14  -5   -2.16    8.89   0
 -14 -13  -6  127.45    7.78   0
 -14 -10  -8   50.67    9.29   0
 -14  -4 -11   17.10    9.87   0
 -14  -1 -12  105.26   10.44   0
 -14   3 -13   14.01    9.88   0
 -13  -8  -9    9.34    7.83   0
 -13  -6 -10    3.15    7.53   0
 -13   4 -13    1.78    9.07   0
 -12 -18   1  119.44    8.45   0
 -12 -16  -2   57.31    8.58   0
 -12 -12  -6    8.49    7.70   0
 -12  -9  -8   15.31    7.74   0
 -12  -3 -11   12.63    6.31   0
 -12   6 -13   74.56    8.77   0
 -11 -19   5   10.91    7.61   0
 -11 -18   2   46.13    8.07   0
 -11 -17   0   30.90    5.55   0
 -11 -10  -7   61.44    8.70   0
 -11  -2 -11  111.68    6.45   0
 -11   2 -12  173.66    8.58   0
 -11  10 -13   24.10    8.62   0
 -11  11 -13   13.08    9.47   0
 -10 -17   1  119.73    6.35   0
 -10 -15  -2  177.65    6.34   0
 -10 -14  -3    3.68    6.95   0
 -10 -13  -4  106.34    7.94   0
 -10 -12  -5   29.77    6.19   0
 -10   4 -12   30.69    7.93   0
 -10  18 -12   15.15   13.16   0
  -9 -18   7   51.30    7.91   0
  -9 -18  10   21.04    7.84   0
  -9 -15  -1  380.27    7.23   0
  -9 -11  -5   62.88    6.85   0
  -9 -10  -6    4.84    4.95   0
  -9  -2 -10   10.22    6.36   0
  -9   8 -12   27.86    7.54   0
  -9  14 -12   -0.82    9.43   0
  -8 -16   2   26.11    5.48   0
  -8 -14  -1  485.56    9.78   0
  -8 -10  -5  272.96    8.40   0
  -8  -7  -7   11.99    6.93   0
  -8  -3  -9   38.24    8.06   0
  -8   0 -10  617.11   10.61   0
  -8   4 -11  641.36   10.54   0
  -8  22 -10   25.29   18.07   0
  -7 -15   2  158.17    7.98   0
  -7 -13  -1   19.06    7.44   0
  -7  -9  -5  100.75    5.65   0
  -7  -1  -9    3.80    7.43   0
  -7  11 -11   36.06    8.40   0
  -6 -12  -1   15.79    4.88   0
  -6 -11  -2   51.50    6.70   0
  -6 -10  -3   12.06    6.62   0
  -6  -6  -6    4.37    4.82   0
  -6  -4  -7   24.28    6.75   0
  -6   7 -10   34.84    9.66   0
  -6  24  -8    1.48   17.60   0
  -5 -12   1  120.24    7.67   0
  -5  -4  -6   17.68    6.81   0
  -5  -2  -7  654.58    9.68   0
  -5   1  -8   20.42    7.22   0
  -5  28  -5    5.00   12.48   0
  -4  -9  -1    0.85    7.25   0
  -4  -8  -2  172.94    8.77   0
  -4   1  -7   10.62    7.19   0
  -4   5  -8   19.27    6.91   0
  -4  24  -6  226.56   13.84   0
  -4  26  -5   23.41   10.28   0
  -4  29  -3   22.86   10.29   0
  -3  -6  -2  437.93   12.29   0
  -3  -4  20   23.95    9.71   0
  -3  -3  -4  479.29   12.66   0
  -3  -1  -5   28.27    9.31   0
  -3  17  -7   21.34   14.38   0
  -3  27  -3   -1.78   10.52   0
  -2  -6   0    5.40   10.91   0
  -2  -3  19   -0.07    8.17   0
  -2  -2  -3   19.53   11.17   0
  -2   0  -4   67.69   11.84   0
  -2  27  -1   12.20    8.92   0
  -2  28   0    6.87   10.01   0
  -2  29   1   20.53    9.76   0
  -1  -7  12   97.58    9.83   0
  -1  -6   3  286.91   18.60   0
  -1  -5  15   13.91    6.81   0
  -1  -4  16   25.44    8.15   0
  -1  -3  17   44.24    8.14   0
  -1   0  19   -8.17    8.14   0
  -1   3  20    7.71    7.89   0
  -1  28   3    1.20    7.32   0
  -1  29   5   35.96    8.50   0
   0  -5  10    2.55    7.58   0
   0  -3  14    5.11    6.72   0
   0  -2  15    1.28    7.17   0
   0  -1  16   -1.80    7.23   0
   0   3  18    6.06    6.31   0
   0   6  19   16.72   10.00   0
   0   9  -3    2.22   11.24   0
   0  13  -3   37.72    7.60   0
   0  18  -2  387.32   10.60   0
   0  22   0  510.68   10.44   0
   0  26   4    2.65    8.49   0
   0  27   6   -5.77   10.08   0
   0  27   7    4.04    7.78   0
   0  27   8  -12.32    7.44   0
   0  27   9   20.95    8.28   0
   1  -2   8  115.85    8.76   0
   1  -2   9  237.24    9.59   0
   1  -1  12   55.03    7.32   0
   1   0  13    1.63    7.92   0
   1   1  14    5.81    6.94   0
   1   2  15   -2.56    6.74   0
   1   4  16   24.95    9.03   0
   1   7  17   72.07    8.38   0
   1   8  17    0.31    6.47   0
   1  14  17   22.70    7.87   0
   1  15  17   42.43    9.85   0
   1  18  16   10.66    9.31   0
   1  19   1   54.81    7.70   0
   1  20  15   11.71    9.80   0
   1  21  14   69.28    7.68   0
   1  22  13   60.74    7.57   0
   1  23   5    1.71    5.65   0
   1  23  12   27.98   10.36   0
   1  24   7    2.02    8.89   0
   1  24   8   20.00    8.73   0
   1  24   9    1.91    8.57   0
   1  24  10   40.11    9.84   0
   2   3   7   81.76    6.37   0
   2   3  10  155.77    7.95   0
   2   4   5   -4.34    9.13   0
   2   5   4   30.78   10.25   0
   2   6  13   -3.94    7.15   0
   2   7   3   46.78    9.72   0
   2   8  14    2.01    7.00   0
   2   9  14    8.22    7.58   0
   2  10  14    2.13    5.98   0
   2  11  14   17.69    6.68   0
   2  12  14   15.85    6.00   0
   2  13  14   -8.18    7.41   0
   2  14  14    3.94    7.90   0
   2  15   3  526.13    9.85   0
   2  16  13    4.81    7.70   0
   2  17   4   26.76    7.31   0
   2  17  12    9.66    6.06   0
   2  18   5   12.19    7.21   0
   2  18  11    2.77    5.72   0
   2  18  12    5.33    6.86   0
   2  19   6    2.46    6.56   0
   2  19   7  311.30    7.44   0
   2  19   8   53.13    5.98   0
   2  19   9  201.88    7.72   0
   2  19  10   98.17    7.91   0
   2  19  11  160.70    7.95   0
 -15 -16  -3   43.99    7.91   0
 -15 -15  -4    0.83    7.48   0
 -15 -14  -5   21.70    7.11   0
 -15 -10  -8   17.20    7.03   0
 -15  -8  -9    3.17    9.31   0
 -15  -6 -10   -4.59    9.58   0
 -15  -4 -11   33.73    8.32   0
 -15  -1 -12   -3.18   10.01   0
 -14 -17  -1    3.88    9.34   0
 -14 -11  -7    4.02    8.73   0
 -14  -8  -9    1.54    8.16   0
 -14  -6 -10   -4.17    8.71   0
 -14   4 -13   -0.30    9.73   0
 -13 -19   3    3.92    8.36   0
 -13 -18   1    7.83    9.36   0
 -13 -17  -1   51.50    6.54   0
 -13 -16  -2    0.58    8.72   0
 -13 -12  -6   57.76    8.51   0
 -13 -11  -7   63.52    6.10   0
 -13  -3 -11   62.20    8.25   0
 -13   0 -12    2.31    6.43   0
 -13   5 -13   19.17    9.13   0
 -13   6 -13   56.76    9.86   0
 -12 -19   4    8.41    8.86   0
 -12 -17   0   31.83    8.29   0
 -12 -15  -3    8.52    5.80   0
 -12 -14  -4   23.19    7.00   0
 -12 -13  -5   69.54    5.91   0
 -12  -7  -9   -5.18    7.16   0
 -12  -5 -10    8.37    5.52   0
 -12  -2 -11   31.51    8.08   0
 -12   1 -12    6.12    6.81   0
 -12   7 -13    3.96    9.01   0
 -12   8 -13   52.27   10.38   0
 -11 -19   6    1.39    7.37   0
 -11 -19  10    3.73   11.06   0
 -11 -16  -1   60.62    7.48   0
 -11 -11  -6   15.14    7.97   0
 -11  -8  -8  228.07    9.07   0
 -11  -6  -9   31.16    8.46   0
 -11  -4 -10   57.48    7.57   0
 -11  -1 -11    9.16    7.18   0
 -11   3 -12   -2.67    8.09   0
 -10 -18   4   31.06    7.02   0
 -10 -16   0   -0.28    8.08   0
 -10  -9  -7   16.90    4.57   0
 -10  -3 -10  128.24    5.90   0
 -10   0 -11    8.83    5.67   0
 -10   5 -12  268.41    9.44   0
  -9 -18   8   33.17    7.47   0
  -9 -18   9    8.63    6.88   0
  -9 -17   3  285.38    8.21   0
  -9 -16   1  430.63    9.26   0
  -9 -14  -2   24.40    5.13   0
  -9 -13  -3   75.11    6.93   0
  -9 -12  -4   10.35    6.47   0
  -9  -8  -7   55.40    5.49   0
  -9  -6  -8   10.17    6.67   0
  -9  -4  -9    0.62    6.78   0
  -9   2 -11  152.06    8.14   0
  -9   9 -12   -9.83    7.27   0
  -9  10 -12   10.02    8.30   0
  -9  11 -12    2.77    8.46   0
  -9  12 -12    5.45    9.07   0
  -9  13 -12    2.99    8.54   0
  -8 -17  11   17.55    7.75   0
  -8 -13  -2   -4.77    7.87   0
  -8 -12  -3   83.09    7.67   0
  -8 -11  -4   30.90    6.84   0
  -8  -5  -8   34.58    5.33   0
  -8   5 -11    9.41    6.87   0
  -7 -12  -2  297.62    8.73   0
  -7 -11  -3   22.24    7.15   0
  -7 -10  -4   70.27    5.49   0
  -7  -7  -6  566.26    9.50   0
  -7   3 -10  149.22    7.94   0
  -6   2  -9   -1.70    7.37   0
  -6  15 -10   79.04   12.12   0
  -5 -14   6   -3.86    6.61   0
  -5  -7  -4   39.30    7.02   0
  -5   6  -9  278.83    9.82   0
  -4 -12   4    2.94    7.05   0
  -3  -8   0  392.63   11.30   0
  -3  -8  17    3.40    8.80   0
  -3  -7  -1   43.66    9.37   0
  -3  -7  18  111.95   10.39   0
  -3   6  -7   90.14    9.84   0
  -3  21  -6   99.53   12.11   0
  -2  -2  20    5.95   11.16   0
  -2   0  21   -0.60   10.12   0
  -2  20  -5   -2.12    8.01   0
  -2  26  -2   69.59    9.28   0
  -1  -6  14   60.53    8.00   0
  -1  -2  -1 1021.49   22.08   0
  -1  -2  18   36.83    8.56   0
  -1   2  20   54.24   10.53   0
  -1  18  -4   -1.11    7.68   0
  -1  21  -3  149.90    8.28   0
  -1  23  -2   20.75    8.83   0
  -1  26   0    8.81    8.88   0
  -1  27   1   22.04    8.56   0
  -1  28   2   39.30    9.17   0
  -1  29   4   -5.37    8.08   0
   0  -4   4 1307.84   41.04   0
   0  -4  13   -1.02    7.41   0
   0   0  17   -6.11    7.27   0
   0   2  18   49.27    9.15   0
   0   4  19    0.75    7.67   0
   0   5  19  -10.12    6.91   0
   0   9  20   -4.52    9.87   0
   0  14  -3    1.17    6.71   0
   0  21  -1  233.73    8.70   0
   0  24   1  -14.20    7.47   0
   0  25   2    1.20    7.94   0
   0  26   3   -2.56    7.83   0
   0  27   5   -3.62    9.83   0
   1  -2   7   26.72    8.56   0
   1  -2  10  322.78    9.58   0
   1   3   1  704.29   18.82   0
   1   3  16   80.71    8.69   0
   1   6  17   63.09    6.27   0
   1  10  -1  189.66   10.02   0
   1  10  18   11.44    8.06   0
   1  11  -1  931.96   14.59   0
   1  11  18   53.63    9.29   0
   1  12  -1  930.95   14.21   0
   1  12  18   93.69    9.40   0
   1  13  18   67.39    9.25   0
   1  16  17   15.46    7.40   0
   1  17   0    8.20    5.28   0
   1  17  17   56.07   11.04   0
   1  19  16   17.70    7.93   0
   1  21   2  116.44    7.47   0
   1  21  15   32.79   11.52   0
   1  22   3  133.43    6.70   0
   1  22  14    5.44    7.86   0
   1  23   4   32.23    5.71   0
   1  23  13   -3.72   11.25   0
   1  24   5  -17.31    7.27   0
   1  24   6   54.95    6.42   0
   1  24  11   -2.99    7.65   0
   1  24  12   29.10    9.48   0
   1  25   8   16.15    7.75   0
   1  25   9   62.46    8.98   0
   2   2   8   11.06    7.26   0
   2   2   9   11.39    6.98   0
   2   3   6    3.72    6.12   0
   2   3  11   29.74    7.74   0
   2   4  12    3.61    5.26   0
   2   5  13  383.68    9.09   0
   2   7  14   20.72    6.73   0
   2  10   2    2.25    7.81   0
   2  10  15   -1.34    6.76   0
   2  11   2   29.55    7.34   0
   2  11  15  108.05    7.50   0
   2  12   2  126.94    8.61   0
   2  12  15   -7.70    7.05   0
   2  13   2   99.29    7.49   0
   2  13  15  145.17    7.95   0
   2  15  14   -2.24    5.56   0
   2  16   3   16.85    7.38   0
   2  16  14   25.02    7.94   0
   2  17  13   43.05    6.41   0
   2  18   4   20.74    7.41   0
   2  18  13   18.59    8.28   0
   2  19   5  296.14    8.51   0
   2  19  12   27.76    8.25   0
   2  20   6   38.83    6.73   0
   2  20   7   10.40    5.82   0
   2  20   8   29.69    6.27   0
   2  20   9   27.10    5.50   0
   2  20  10   37.88    7.63   0
   2  20  11   12.38    7.87   0
 -15 -17  -1    8.42    9.63   0
 -15 -11  -7   71.85    9.22   0
 -15  -3 -11    2.91   10.08   0
 -15   0 -12   14.90   11.89   0
 -14 -18   1   -7.04    9.51   0
 -14 -16  -2    7.02    9.77   0
 -14 -12  -6    1.97    8.38   0
 -14  -9  -8  207.05    9.45   0
 -14  -3 -11    0.81    7.46   0
 -14   0 -12    0.09    7.80   0
 -14   5 -13    2.78   10.26   0
 -13 -19   4   48.08    9.91   0
 -13 -15  -3   70.96    7.87   0
 -13 -14  -4   26.89    9.06   0
 -13 -13  -5   70.44    7.96   0
 -13  -9  -8   13.58    5.75   0
 -13  -7  -9   97.26    8.03   0
 -13  -5 -10    5.97    8.15   0
 -13   1 -12   21.63    8.03   0
 -13   7 -13   63.91   10.03   0
 -12 -19   5    6.40    8.77   0
 -12 -18   2   19.82    6.35   0
 -12 -10  -7  242.20    7.04   0
 -12   2 -12    5.32    8.17   0
 -12   9 -13    8.96    9.55   0
 -12  10 -13  114.49   10.95   0
 -12  11 -13   -8.62   10.11   0
 -12  12 -13   14.34   11.40   0
 -12  13 -13   15.16   11.54   0
 -11 -19   9    1.92    7.99   0
 -11 -18   3   20.65    6.33   0
 -11 -17   1   21.22    6.99   0
 -11 -15  -2  127.60    6.20   0
 -11 -14  -3   -1.10    7.87   0
 -11 -13  -4   38.99    8.27   0
 -11 -12  -5   57.42    7.64   0
 -11   4 -12   18.18    8.02   0
 -10 -18   5    9.81    8.63   0
 -10 -18  12    8.75   11.67   0
 -10 -17   2   79.09    5.89   0
 -10 -15  -1   17.31    7.49   0
 -10 -10  -6   13.78    6.02   0
 -10  -7  -8   39.15    4.78   0
 -10  -5  -9  123.84    5.78   0
 -10   1 -11   12.62    8.26   0
 -10   6 -12    4.33    8.24   0
 -10  17 -12   37.82   11.36   0
  -9 -17   4   14.07    8.28   0
  -9  -9  -6   -7.56    7.17   0
  -9  -1 -10    4.03    6.73   0
  -9   3 -11  334.06    9.42   0
  -9  20 -11   30.02   13.79   0
  -8 -17   7    5.56    7.08   0
  -8 -17   8   10.31    7.49   0
  -8 -17   9   35.92    8.00   0
  -8 -17  10   16.15    7.57   0
  -8 -16   3   18.58    6.37   0
  -8 -16  14    0.21   11.42   0
  -8 -15   1    1.84    6.48   0
  -8  -8  -6   29.58    7.07   0
  -8  -2  -9   48.63    7.33   0
  -8   1 -10   12.41    7.64   0
  -8   6 -11  176.16    8.09   0
  -8  17 -11   27.71   11.56   0
  -7 -16   6  396.48    9.60   0
  -7 -16  11    6.54    7.88   0
  -7 -15   3   12.62    7.31   0
  -7 -14   1  117.75    7.92   0
  -7  -5  -7   11.58    6.56   0
  -7  -3  -8  150.18    6.28   0
  -7   0  -9    8.34    7.22   0
  -6 -15   6  194.81    8.26   0
  -6 -15  11   82.87    8.67   0
  -6 -14   3   54.86    7.65   0
  -6 -13   1   76.93    7.28   0
  -6  -7  -5    2.09    4.89   0
  -6  -1  -8  136.80    7.15   0
  -6   8 -10    8.83    7.32   0
  -6   9 -10   48.73    8.64   0
  -6  14 -10    9.78   10.69   0
  -5 -14   7   16.26    7.73   0
  -5 -14  10    6.43    9.18   0
  -5 -11   0   11.25    6.92   0
  -5  -8  -3  437.83    9.44   0
  -4 -11   2   22.56    6.83   0
  -4  -9  18    3.33   11.74   0
  -4  -8  19    2.65   10.06   0
  -4  -5  -4   69.82    6.50   0
  -4  -1  -6   14.10    7.78   0
  -4   6  -8  210.82    9.14   0
  -4  28  -4   41.96   10.56   0
  -3  -6  19    4.81    9.42   0
  -3   2  -6 1468.59   17.93   0
  -2  -9   5  891.98   20.74   0
  -2  -7  16   23.76    7.92   0
  -2  -6  17    0.43    7.27   0
  -2  -5  18   80.59    8.63   0
  -2   3  -5  123.86   10.63   0
  -2   8  -6   24.12   11.70   0
  -2  23  -4   14.81    8.40   0
  -2  25  -3   99.80   10.76   0
  -2  29   0   69.75    8.92   0
  -1  -1  19   42.16   10.15   0
  -1   1  20   10.46    9.25   0
  -1  25  -1  135.94    8.57   0
  -1  29   3   13.91    9.93   0
   0  -5  11   11.13    6.68   0
   0   1  18    5.19    7.93   0
   0   7  20    5.83    9.92   0
   0   8  20  124.40    9.18   0
   0  15  -3   37.35    8.48   0
   0  19  -2   -2.53    7.75   0
   0  23   0   -1.12    8.39   0
   0  27   4   -7.45    9.19   0
   0  28   6   50.90   10.09   0
   0  28   7   -7.29    7.89   0
   1  -2  11   77.27    7.54   0
   1  -1  13   67.78    7.94   0
   1   0  14    2.30    6.96   0
   1   1  15    1.66    6.85   0
   1   5   0   27.19   11.90   0
   1   5  17   23.44    5.34   0
   1   7  18   24.53    7.87   0
   1   8  18   23.84    9.03   0
   1   9  -1   76.41    9.81   0
   1   9  18   33.95    6.41   0
   1  13  -1  152.46    7.18   0
   1  14  -1   31.49    7.52   0
   1  14  18   16.17    7.12   0
   1  15  18   -1.52   10.87   0
   1  18   0  169.24    8.61   0
   1  20   1   76.44    5.33   0
   1  22   2   17.97    7.10   0
   1  23   3   15.14    8.22   0
   1  24   4   53.19    7.40   0
   1  25   6   40.07    8.55   0
   1  25   7  100.39    7.32   0
   1  25  10   -4.09    7.28   0
   1  25  11   35.14   11.25   0
   2   2   7   -3.62    7.64   0
   2   2  10    7.13    7.03   0
   2   3  12   21.17    7.31   0
   2   4  13    7.01    7.48   0
   2   5  14   42.28    6.68   0
   2   6   3   26.11    7.93   0
   2   6  14    3.40    4.78   0
   2   8  15   -0.43    8.55   0
   2   9   2   17.57    8.13   0
   2   9  15  318.88    7.93   0
   2  14   2    0.55    6.77   0
   2  14  15   -8.23    5.94   0
   2  15  15  162.12    9.19   0
   2  16  15   -7.27    8.22   0
   2  17   3   48.88    7.42   0
   2  17  14   16.54    6.38   0
   2  18  14   13.19    7.71   0
   2  19   4   33.52    7.11   0
   2  19  13  141.64    9.72   0
   2  20   5   -8.24    6.77   0
   2  20  12   39.36    8.35   0
   2  21   7   34.86    7.92   0
   2  21   8    1.24    5.78   0
   2  21   9   13.95    5.92   0
   2  21  10   21.75    8.56   0
   2  21  11   16.36    7.96   0
 -15 -16  -2   34.90    7.75   0
 -15 -15  -3   -5.81    9.48   0
 -15 -14  -4   -0.02    8.86   0
 -15 -13  -5   72.11   10.22   0
 -15 -12  -6   42.30    7.76   0
 -15  -9  -8    6.07    8.70   0
 -15  -7  -9   -7.29   10.21   0
 -15  -5 -10   -5.46    9.46   0
 -14 -15  -3   19.45    6.80   0
 -14 -14  -4   44.17    7.90   0
 -14 -13  -5   17.76    5.97   0
 -14  -7  -9   11.31    7.71   0
 -14  -5 -10   46.78    7.04   0
 -14  -2 -11    7.02    9.90   0
 -14   1 -12  108.46    9.63   0
 -13 -19   5    9.74   10.45   0
 -13 -18   2    1.53    8.61   0
 -13 -17   0   48.95    6.75   0
 -13 -10  -7   -2.54    7.80   0
 -13  -2 -11    2.62    6.41   0
 -13   2 -12   34.02    8.28   0
 -13   8 -13   -2.78    9.22   0
 -13   9 -13   13.43   10.81   0
 -12 -19   6   -2.82    8.82   0
 -12 -19   7   -0.77    9.46   0
 -12 -18   3  136.54    9.27   0
 -12 -16  -1   53.51    6.33   0
 -12 -15  -2   -4.21    7.30   0
 -12 -12  -5    9.96    7.39   0
 -12 -11  -6   42.98    5.66   0
 -12  -8  -8    9.86    5.49   0
 -12  -6  -9  145.28    7.51   0
 -12  -4 -10   34.36    6.11   0
 -12  -1 -11   21.38    7.05   0
 -12   3 -12    9.11    8.75   0
 -11 -18   4   12.90    8.76   0
 -11 -16   0  176.29    8.57   0
 -11  -9  -7    0.40    6.15   0
 -11  -3 -10   25.57    6.32   0
 -11   0 -11    6.30    6.83   0
 -11   5 -12   45.70    9.36   0
 -10 -18   6   22.48    8.44   0
 -10 -14  -2   34.53    7.70   0
 -10 -12  -4    2.93    6.56   0
 -10 -11  -5   19.54    5.83   0
 -10  -8  -7   10.86    6.84   0
 -10  -2 -10   -0.38    5.19   0
 -10   7 -12    9.75    7.86   0
 -10  16 -12    2.60   11.45   0
  -9 -17  13   87.34   11.34   0
  -9 -16   2   -2.09    6.83   0
  -9 -15   0   47.54    5.11   0
  -9 -10  -5   36.29    7.60   0
  -9  -3  -9  173.89    7.87   0
  -8 -14   0  294.52    8.97   0
  -8  -6  -7  319.46    8.77   0
  -8  -4  -8  245.29    8.22   0
  -8   7 -11    5.23    7.49   0
  -7 -16   7   27.90    7.08   0
  -7 -16  10  211.49   10.00   0
  -7  -8  -5   47.64    6.77   0
  -7   4 -10   25.77    7.26   0
  -6 -15   7   58.53    6.97   0
  -6 -12   0   -2.31    6.80   0
  -6  -8  -4   31.41    7.06   0
  -6  -5  -6  676.25   10.12   0
  -6  -3  -7  470.00    9.44   0
  -6   3  -9   14.54    7.47   0
  -6  10 -10   -2.63    7.85   0
  -6  11 -10   38.80    8.84   0
  -6  13 -10  114.26   10.96   0
  -5 -14   8   14.67    7.42   0
  -5 -14   9    6.24    7.26   0
  -5 -10  -1   60.60    7.12   0
  -5  -9  -2   28.53    6.59   0
  -5  -5  -5  338.52    8.79   0
  -5  -3  -6  173.75    8.11   0
  -5  -1  -7  494.58    9.03   0
  -5   2  -8   23.61    6.56   0
  -5   7  -9  582.01   12.21   0
  -5  16  -9  135.16   14.80   0
  -4  -7  20    3.80   11.73   0
  -4  -3  -5   33.91    8.10   0
  -4   2  -7    3.17    6.92   0
  -3 -11   6  426.98   13.03   0
  -3  -9  16    6.13    7.78   0
  -3  -5  20    2.95    8.36   0
  -3  24  -5    6.88   10.64   0
  -3  26  -4   95.08    9.74   0
  -3  29  -2   14.19   11.23   0
  -2  -8   3    3.77    9.75   0
  -2  -4  19    6.94    8.23   0
  -2  16  -6   45.00   11.00   0
  -2  28  -1   -2.14    9.88   0
  -1  -4  17   24.52    8.54   0
  -1  19  -4    5.55    8.34   0
  -1  24  -2   35.03    9.06   0
  -1  28   1    0.51    9.10   0
   0  -5   6   -2.15   12.06   0
   0  -3  15    6.28    7.35   0
   0  -2  16   79.70    8.56   0
   0  -1  17    9.02    7.50   0
   0   3  19    7.57    6.21   0
   0   5  20    0.26    8.64   0
   0   6  20   -2.68    7.24   0
   0   8  -3   -1.05   10.89   0
   0  22  -1    7.61    6.67   0
   0  25   1   91.20    8.57   0
   0  26   2   18.25    9.05   0
   0  27   3   14.25    7.68   0
   0  28   5   -7.83    9.88   0
   1  -2   6  176.30   11.25   0
   1   2  16   65.26    9.09   0
   1   4  17   13.91    5.94   0
   1   6  18   27.55    8.73   0
   1  12  19   93.14   10.44   0
   1  15  -1  125.28    8.07   0
   1  19   0   -1.01    6.76   0
   1  21   1  191.47    7.75   0
   1  25   5  114.74    9.32   0
   1  26   7   18.77    8.46   0
   1  26   8   27.31    9.98   0
   1  26   9   73.49    9.13   0
   1  26  10   24.20   11.26   0
   2   2   6   21.08    8.82   0
   2   2  11    4.09    5.28   0
   2   3   5  119.14    8.38   0
   2   3  13   44.34    7.26   0
   2   4   4   15.79    7.97   0
   2   6  15    4.93    7.25   0
   2   7  15   12.99    5.90   0
   2   8   2   32.52    9.28   0
   2   9  16   22.54    7.38   0
   2  10  16    9.94    7.75   0
   2  11  16    5.00    8.25   0
   2  12  16   25.53    8.54   0
   2  13  16   27.76    8.25   0
   2  14  16   -0.16    9.35   0
   2  15   2    3.59    5.06   0
   2  15  16    6.79    7.67   0
   2  16   2   79.56    8.00   0
   2  17  15   56.56    8.75   0
   2  18   3   51.39    8.17   0
   2  19  14    7.25    9.53   0
   2  20   4    5.07    6.39   0
   2  20  13    0.41    6.39   0
   2  21   5   23.45    6.98   0
   2  21   6    9.67    5.70   0
   2  21  12   12.17    8.36   0
   2  22   7   34.46    7.68   0
   2  22   8   31.75    7.87   0
   2  22   9    3.62    6.10   0
   2  22  10   28.02    8.82   0
   2  22  11  -11.72    7.72   0
   3   9   8    0.22    6.85   0
   3   9   9    8.14    6.90   0
   3   9  10   30.70    6.98   0
   3  10   7   40.84    7.00   0
   3  10   8  270.06    6.81   0
   3  10   9   28.08    4.83   0
   3  10  10   35.17    7.34   0
   3  11   7  145.51    7.63   0
   3  11   8  289.91    7.08   0
   3  11   9  202.28    6.69   0
   3  11  10  138.09    6.73   0
   3  11  11  141.59    7.48   0
   3  12   7  108.74    7.79   0
   3  12   8  268.70    7.24   0
   3  12   9  229.79    6.84   0
   3  12  10  108.61    6.14   0
   3  12  11   58.02    7.02   0
   3  13   7   34.89    7.15   0
   3  13   8  112.94    6.02   0
   3  13   9   31.44    5.78   0
   3  13  10    9.74    6.88   0
   3  13  11   -4.78    6.15   0
   3  14   7  130.17    7.46   0
   3  14   8   48.31    7.83   0
   3  14   9   11.17    6.81   0
   3  14  10   26.60    7.06   0
   3  15   8   36.77    6.89   0
   3  15   9   -3.28    6.77   0
   3  15  10   61.69    6.12   0
 -16 -10  -7  127.69   11.36   0
 -15 -17   0   -0.98    9.52   0
 -15 -10  -7   98.06    9.48   0
 -15  -2 -11   76.59    8.98   0
 -14 -18   2   -1.38    8.91   0
 -14 -17   0    7.06    7.07   0
 -14 -10  -7    7.98    6.23   0
 -14  -4 -10   13.01    8.40   0
 -14   2 -12   -2.38   10.25   0
 -13 -19   6   12.78   10.59   0
 -13 -16  -1   24.70    8.24   0
 -13 -11  -6  210.06    8.39   0
 -13  -8  -8   24.99    5.87   0
 -13  -6  -9   32.67    8.70   0
 -13  -4 -10   11.12    6.15   0
 -13  -1 -11    1.41    8.49   0
 -13   3 -12   90.01    9.81   0
 -13  10 -13   23.82   10.27   0
 -12 -17   1   -1.03    6.17   0
 -12 -14  -3  317.70    7.50   0
 -12 -13  -4   -5.49    5.45   0
 -12  -3 -10    5.80    7.86   0
 -12   0 -11  278.62    9.47   0
 -12   4 -12   49.99    8.77   0
 -11 -18   5   -4.49    8.06   0
 -11 -17   2   63.30    7.46   0
 -11 -10  -6    9.93    6.69   0
 -11  -7  -8   68.94    6.37   0
 -11  -5  -9   24.40    5.94   0
 -11   1 -11   11.48    7.63   0
 -10 -18   8   30.61    9.37   0
 -10 -18  10    6.25   10.08   0
 -10 -18  11    2.61    7.55   0
 -10 -17   3   14.48    5.42   0
 -10 -16   1   73.50    6.57   0
 -10 -13  -3   -4.57    4.74   0
 -10  -6  -8    7.14    6.43   0
 -10  -4  -9   17.34    4.80   0
 -10   2 -11    5.73    7.39   0
 -10   8 -12   10.44    7.28   0
 -10   9 -12  199.07   10.33   0
 -10  15 -12   36.83   11.64   0
  -9 -17   5  239.81    8.80   0
  -9 -14  -1   72.35    5.49   0
  -9 -13  -2   -4.11    6.93   0
  -9 -12  -3   27.05    7.06   0
  -9 -11  -4   27.74    7.51   0
  -9  -7  -7  240.61    6.94   0
  -9  -5  -8   -5.53    7.26   0
  -9   0 -10    6.05    5.22   0
  -9   4 -11   11.77    6.96   0
  -8 -16   4   -0.64    6.35   0
  -8 -15   2   54.73    6.95   0
  -8 -13  -1   36.00    7.38   0
  -8 -10  -4   39.71    7.38   0
  -8  -9  -5   23.76    5.34   0
  -8  -1  -9   46.33    7.20   0
  -8   2 -10    4.26    7.12   0
  -8   8 -11  107.29    8.02   0
  -8  16 -11    6.76    9.99   0
  -7 -16   9   -0.49    7.00   0
  -7 -15   4  229.53    8.58   0
  -7 -15  14   41.11   12.66   0
  -7 -13   0   41.29    5.57   0
  -7  -9  -4   66.88    7.10   0
  -7  -2  -8  618.01   10.47   0
  -7   5 -10   54.75    7.88   0
  -7  19 -10   -0.51   11.48   0
  -6 -15   8  103.27    7.52   0
  -6 -15   9  139.20    9.21   0
  -6 -15  10   69.59    9.33   0
  -6 -14  14    0.49   13.11   0
  -6 -11  -1   28.66    6.66   0
  -6 -10  -2    1.73    6.62   0
  -6  -9  -3  394.25    9.08   0
  -6   0  -8   35.23    7.09   0
  -6  12 -10   29.40    8.30   0
  -5 -12   2   32.59    6.86   0
  -5   8  -9  264.91   10.51   0
  -5  27  -6   23.11   14.44   0
  -4 -10   1  375.99    9.83   0
  -4 -10  17   21.27   11.78   0
  -4  -6  -3  364.64    8.77   0
  -4   7  -8   23.68    7.77   0
  -4  22  -7    0.26   11.97   0
  -3  -4  -3  685.81   12.50   0
  -3   7  -7    6.04    8.67   0
  -3  28  -3   13.93   10.71   0
  -2  -9  13  321.47   14.14   0
  -2  -8  15   -4.92    8.84   0
  -2  -3  -2 1195.87   18.90   0
  -2  -3  20    8.73    8.89   0
  -2  27  -2   35.18    9.01   0
  -1  -5  16    1.52    7.04   0
  -1  -3  18   22.87    8.48   0
  -1   0  20    3.63   10.67   0
  -1   2  -3    6.82   14.07   0
  -1   2  21   27.90   10.81   0
  -1   5  -4    9.52   13.96   0
  -1  22  -3  148.59    8.97   0
  -1  26  -1   38.29    8.07   0
  -1  27   0    5.86    8.84   0
  -1  29   2    5.71    9.74   0
   0  -5  12   -1.75    5.80   0
   0  -4  14  128.25    7.94   0
   0   0  18  703.00   12.80   0
   0   2  19  -10.55    9.31   0
   0   4  -2  797.67   39.12   0
   0   4  20  110.57   10.18   0
   0  16  -3    0.77    6.83   0
   0  20  -2   38.91    7.19   0
   0  24   0  499.20   10.48   0
   0  28   4   75.89   10.47   0
   1  -2  12  193.43    9.01   0
   1  -1  14   -4.49    6.65   0
   1   0   3   -1.33    8.29   0
   1   0  15    3.02    6.89   0
   1   1  16   23.05    7.61   0
   1   3  17   26.43    8.40   0
   1   5  18    7.03    9.57   0
   1   8  -1  410.94   13.46   0
   1   8  19   42.48    9.14   0
   1   9  19   -9.15    9.75   0
   1  10  19   20.22    7.26   0
   1  11  19   42.50    7.51   0
   1  16  -1   79.55    7.62   0
   1  23   2   29.16    8.72   0
   1  24   3   17.02    7.72   0
   1  25   4   18.46    8.87   0
   1  26   6   18.38    8.87   0
   1  27   9   10.14    9.81   0
   2   1   8   36.87    7.77   0
   2   1   9 1064.85   13.71   0
   2   1  10   31.01    6.99   0
   2   2  12    6.08    7.46   0
   2   4  14    8.54    5.07   0
   2   5   3 1218.60   16.99   0
   2   5  15  299.41    9.52   0
   2   7   2  155.64   11.03   0
   2   7  16   21.32    7.07   0
   2   8  16   12.67    5.73   0
   2  16  16   16.60    7.62   0
   2  17   2   16.77    7.44   0
   2  17  16    3.45    8.67   0
   2  18  15  -10.56    7.46   0
   2  19   3  418.03    9.35   0
   2  19  15  174.76   10.77   0
   2  20  14   11.73    6.92   0
   2  21  13   31.38    7.20   0
   2  22   6   51.04    5.96   0
   2  22  12   11.48    9.80   0
   2  23   7  363.89    9.32   0
   2  23   8   14.76    7.85   0
   2  23   9  313.83    9.79   0
   2  23  10    6.68    8.54   0
   2  23  11  213.61    9.95   0
   3   7   9   -2.80    6.52   0
   3   8   7    3.95    7.05   0
   3   8   8  201.71    6.40   0
   3   8   9   32.81    5.03   0
   3   8  10  330.76    8.94   0
   3   8  11   24.98    6.75   0
   3   9   7   73.95    5.51   0
   3   9  11   32.38    6.29   0
   3  10   6  354.86    8.93   0
   3  10  11   67.59    6.04   0
   3  10  12   14.46    6.74   0
   3  11   6  456.96    9.21   0
   3  11  12   67.55    7.42   0
   3  12   6  597.99    8.57   0
   3  12  12  111.59    7.43   0
   3  13   6  235.54    8.39   0
   3  13  12  117.96    7.90   0
   3  14   6   10.25    7.05   0
   3  14  11   12.84    5.53   0
   3  14  12   18.51    7.93   0
   3  15   7   38.75    6.04   0
   3  15  11   23.74    7.71   0
   3  16   7   33.52    7.39   0
   3  16   8  252.28    6.43   0
   3  16   9    9.46    4.66   0
   3  16  10  242.75    8.57   0
   3  16  11   28.32    7.56   0
   3  17   8  180.10    7.31   0
   3  17   9   36.50    6.74   0
   3  17  10  114.39    8.04   0
 -16 -11  -6   -8.01   10.20   0
 -16  -8  -8   -6.94   10.69   0
 -16  -6  -9    5.93   11.01   0
 -15 -16  -1   61.54    9.04   0
 -15 -11  -6   16.26    8.93   0
 -15  -8  -8   11.12    9.00   0
 -15  -6  -9   19.33    9.80   0
 -15  -4 -10   13.10    9.02   0
 -15  -1 -11    3.12   10.02   0
 -14 -18   3    5.08   10.57   0
 -14 -16  -1  -10.36    7.41   0
 -14 -12  -5   15.98    8.99   0
 -14 -11  -6   49.35    6.86   0
 -14  -8  -8   28.02    6.46   0
 -14  -6  -9   12.10    7.75   0
 -14  -1 -11    9.78    8.86   0
 -14   3 -12    2.72   10.14   0
 -13 -18   3   -0.84    7.02   0
 -13 -17   1   31.51    7.79   0
 -13 -15  -2    0.84    6.14   0
 -13 -14  -3   55.61    7.92   0
 -13 -13  -4   53.01    8.13   0
 -13 -12  -5   23.37    6.29   0
 -13  -9  -7   -2.72    8.05   0
 -12 -18   4   36.36    7.76   0
 -12 -16   0    9.50    7.82   0
 -12 -10  -6  -10.21    7.48   0
 -12  -7  -8    5.43    6.80   0
 -12  -5  -9   10.39    7.64   0
 -12   5 -12   11.45    8.74   0
 -11 -15  -1   13.34    5.43   0
 -11 -14  -2    8.54    8.28   0
 -11 -13  -3   27.16    8.46   0
 -11 -12  -4  142.28    8.19   0
 -11 -11  -5    6.09    5.24   0
 -11  -8  -7   15.62    7.65   0
 -11  -2 -10  129.08    7.14   0
 -11   6 -12  129.24    7.40   0
 -11   7 -12   59.03    9.39   0
 -10 -18   9   -0.73    7.06   0
 -10 -17   4   22.07    7.90   0
 -10 -15   0  148.25    8.63   0
 -10  -9  -6  159.45    5.99   0
 -10  -1 -10  273.94    7.07   0
 -10   3 -11   74.43    9.08   0
 -10  10 -12   22.82    8.25   0
 -10  11 -12   10.84    9.57   0
 -10  12 -12   -0.08    8.42   0
 -10  14 -12    8.48    9.46   0
  -9 -17  12   -1.06   10.77   0
  -9 -16   3  120.13    8.34   0
  -9 -15   1  384.54    8.69   0
  -9  -8  -6   -0.33    7.91   0
  -9   5 -11   30.47    7.92   0
  -8 -16   5   73.91    8.44   0
  -8 -12  -2   48.91    6.80   0
  -8 -11  -3   11.68    6.10   0
  -8  -7  -6    0.02    6.91   0
  -8   9 -11   32.96    8.10   0
  -8  15 -11    0.38   10.14   0
  -7 -14   2   -0.02    7.25   0
  -7 -14  16    0.10    8.78   0
  -7 -12  -1    8.80    5.12   0
  -7 -11  -2   61.41    7.49   0
  -7 -10  -3    9.66    6.27   0
  -7  -6  -6  710.41    9.03   0
  -7  -4  -7   35.84    6.63   0
  -7   1  -9   -4.07    5.21   0
  -6 -13   2  190.12    8.50   0
  -6  -6  -5   92.88    7.50   0
  -6   4  -9   10.54    7.42   0
  -5  -6  -4   22.89    7.23   0
  -5   3  -8    4.95    7.12   0
  -5   9  -9   25.36    8.34   0
  -4 -12   5   56.56    6.90   0
  -4  -9   0   88.92    7.62   0
  -4  -7  -2   16.07    8.30   0
  -4  27  -5   17.68   12.43   0
  -3  -2  -4 1753.31   18.85   0
  -3   0  -5    2.63    8.70   0
  -2  21  -5   16.38   10.13   0
  -2  30   0   -4.52   10.53   0
  -1  -6  15   12.48    7.64   0
  -1  12  -5  322.75   18.24   0
   0  17  -3   23.35    8.48   0
   0  23  -1    9.47    8.86   0
   0  26   1   -0.83    7.81   0
   0  27   2   10.33    8.50   0
   0  28   3   -4.21    8.73   0
   0  29   5   20.58   10.55   0
   1  -3   9  401.07   11.91   0
   1  -2  13  161.48    9.03   0
   1  -1   4  185.90   13.14   0
   1   1   2  161.68   14.04   0
   1   2  17   -1.30    8.05   0
   1   4  18   13.25    8.50   0
   1   7  19   25.97   10.45   0
   1  17  -1   54.68    8.13   0
   1  20   0  140.60    7.90   0
   1  22   1  206.37    8.93   0
   1  26   5   40.28    6.90   0
   1  27   7   -1.45   10.67   0
   1  27   8   27.59    7.32   0
   2   1   7 2353.91   20.00   0
   2   1  11  769.59   11.72   0
   2   2  13   -2.24    7.67   0
   2   3  14   13.12    6.70   0
   2   4  15    3.93    6.90   0
   2   6  16    1.31    7.79   0
   2  10  17    8.83    8.42   0
   2  11   1  217.62    9.26   0
   2  11  17   38.83    7.03   0
   2  12   1   43.67    7.55   0
   2  12  17    3.49    6.28   0
   2  13   1  759.54   11.82   0
   2  13  17  110.96    7.29   0
   2  14   1   -5.00    7.22   0
   2  14  17  -10.95    7.55   0
   2  16  17  -18.56    8.93   0
   2  18   2    4.70    7.47   0
   2  18  16    9.80    7.31   0
   2  19  16   15.39    9.64   0
   2  20   3    9.06    6.98   0
   2  20  15    7.58   10.63   0
   2  21   4   -0.80    5.08   0
   2  21  14   12.04    7.08   0
   2  22   5   22.12    6.00   0
   2  22  13    2.68    6.72   0
   2  23   6    2.17    8.09   0
   2  23  12    4.72   10.19   0
   2  24   8   -1.91    8.51   0
   2  24   9   17.14    7.82   0
   3   7   7   -1.11    7.51   0
   3   7   8  379.50    7.65   0
   3   7  10  343.25    7.39   0
   3   7  11    1.88    7.24   0
   3   8   6  122.45    7.92   0
   3   8  12  149.89    7.88   0
   3   9   6    4.16    5.28   0
   3   9  12   35.20    5.41   0
   3  10  13   19.38    7.81   0
   3  11   5  215.19    8.30   0
   3  11  13   68.05    7.92   0
   3  12   5  287.48    8.37   0
   3  12  13   60.59    8.44   0
   3  13   5   56.46    7.25   0
   3  13  13   35.83    8.77   0
   3  14   5  161.55    8.05   0
   3  14  13   38.34    7.79   0
   3  15   6    9.73    5.14   0
   3  15  12   34.32    5.81   0
   3  15  13   13.54    7.22   0
   3  16   6  373.35    9.66   0
   3  16  12  210.63    8.50   0
   3  17   7   35.10    6.93   0
   3  17  11   64.71    5.93   0
   3  18   8   15.28    7.45   0
   3  18   9   -4.61    8.43   0
   3  18  11   10.39    7.41   0
 -16 -13  -4   -1.28    9.90   0
 -16 -12  -5   14.90    7.76   0
 -16  -9  -7   -1.17   11.12   0
 -15 -17   1    0.57    9.81   0
 -15 -15  -2    1.64    6.89   0
 -15 -14  -3   -2.19    9.23   0
 -15 -13  -4  -14.03    8.80   0
 -15  -9  -7    6.98    9.48   0
 -14 -17   1    0.37    7.29   0
 -14 -14  -3    2.32    6.18   0
 -14  -9  -7    2.66    8.16   0
 -14  -3 -10   14.57    8.46   0
 -14   0 -11    4.99    9.32   0
 -14   4 -12    9.75    9.81   0
 -13 -18   4    1.07    9.37   0
 -13 -16   0    4.33    8.69   0
 -13 -10  -6   13.76    7.49   0
 -13  -5  -9   -3.41    8.59   0
 -13   0 -11   -4.26    6.53   0
 -13   4 -12    5.03    6.98   0
 -12 -17   2   15.73    6.92   0
 -12 -15  -1   10.08    6.95   0
 -12 -11  -5    1.39    7.37   0
 -12  -2 -10    6.98    8.09   0
 -12   1 -11    0.57    7.38   0
 -12   6 -12   39.96    8.98   0
 -11 -18   6   -1.50    9.19   0
 -11 -17   3   -7.19    7.04   0
 -11  -6  -8  179.66    6.28   0
 -11  -4  -9   11.89    6.64   0
 -11   8 -12   89.81   10.07   0
 -10 -16   2   -4.96    7.70   0
 -10 -14  -1    6.83    7.52   0
 -10 -10  -5   10.50    5.18   0
 -10  -7  -7   11.49    6.06   0
 -10   0 -10   59.28    7.57   0
  -9  -6  -7   78.02    7.98   0
  -9  -4  -8   23.98    7.53   0
  -9  -2  -9   69.21    5.71   0
  -9   1 -10    7.03    5.26   0
  -9   6 -11   93.05    8.42   0
  -9  19 -11   -0.89   11.56   0
  -8 -16  13    2.63   10.40   0
  -8 -14   1  501.82   10.04   0
  -8  -5  -7    0.48    6.45   0
  -8  -3  -8    5.97    5.27   0
  -8   3 -10   28.64    5.26   0
  -8  10 -11  262.54    9.68   0
  -8  11 -11    1.75    8.01   0
  -8  12 -11   14.09    8.65   0
  -8  13 -11   30.22    8.94   0
  -8  14 -11  181.09   11.73   0
  -7  -7  -5   58.95    7.04   0
  -7   6 -10  133.13    8.32   0
  -6  -4  -6   20.99    7.28   0
  -6  -2  -7   -2.27    6.22   0
  -5 -11   1  172.32    8.24   0
  -5   0  -7   -5.28    5.18   0
  -5  15  -9   69.01   11.63   0
  -5  25  -7   58.77   14.45   0
  -4  -8  -1  123.87    6.76   0
  -4  -4  -4 1285.11   14.91   0
  -4   0  -6 3558.85   23.03   0
  -4   3  -7    0.73    7.25   0
  -4   8  -8  409.86   12.38   0
  -4  25  -6    5.94   10.30   0
  -3 -11   7  138.29    9.99   0
  -3 -10   4  102.26    8.12   0
  -3  -5  -2   26.36    9.77   0
  -3   3  -6  919.90   15.39   0
  -3  22  -6   37.04   10.82   0
  -2  -6  18    0.87    8.58   0
  -2  -5  19  139.50   10.51   0
  -2   1  -4  428.38   15.04   0
  -2  17  -6   57.75   12.19   0
  -2  24  -4    4.96    8.07   0
  -2  26  -3    1.10    8.69   0
  -2  29  -1   -8.76   10.07   0
  -1  -5   2   14.87   13.27   0
  -1  -1  20   16.44    9.08   0
  -1   0  -2   -0.13    8.05   0
  -1   1  21    5.48   11.57   0
  -1  13  -5   52.97   10.52   0
  -1  14  -5   24.14    9.63   0
  -1  20  -4   66.35    9.37   0
  -1  23  -3   11.28    9.41   0
  -1  25  -2   15.04    8.16   0
  -1  28   0   32.65    9.02   0
  -1  29   1   15.43   10.04   0
   0  -5  13   -0.22    8.23   0
   0  -3  16    5.04    8.12   0
   0  -2  17    0.14    7.36   0
   0  -1  18   -0.53    8.48   0
   0   3  20   -6.42    7.49   0
   0  21  -2    2.39    6.78   0
   0  25   0   -1.53    7.71   0
   0  29   4    9.18   10.58   0
   1  -3   8  154.23    9.11   0
   1  -3  10  344.30    9.82   0
   1  -3  11  158.49    9.04   0
   1   3  18   34.17    8.10   0
   1   5  19   10.80    8.17   0
   1   6  19   -6.23    7.33   0
   1  18  -1   66.73    7.35   0
   1  24   2   13.31    8.33   0
   1  25   3  -17.23   10.36   0
   1  26   4    0.96    9.00   0
   1  27   5    5.65    8.69   0
   1  27   6   -9.81    7.78   0
   2   1  12   44.58    7.55   0
   2   2   5    3.11   10.09   0
   2   3   4  353.27   10.60   0
   2   5  16   -1.62    8.22   0
   2   6   2   19.77   10.35   0
   2   7  17  -11.83    8.01   0
   2   8  17   -0.53    6.34   0
   2  10   1   15.05    5.87   0
   2  15   1  379.98    9.58   0
   2  16   1    6.64    6.93   0
   2  17  17    2.21    8.38   0
   2  19   2   30.26    7.59   0
   2  21   3   13.63    7.54   0
   2  22   4   16.60    8.89   0
   2  22  14    2.00    8.03   0
   2  23   5  176.84    9.78   0
   2  24   7   -0.89    8.71   0
   2  24  11   -9.25    7.63   0
   2  24  12   -6.24   11.38   0
   3   6   8  427.63    7.96   0
   3   6   9   26.91    4.79   0
   3   6  10  266.84    7.27   0
   3   6  11   24.61    7.54   0
   3   7   6  568.68   10.13   0
   3   7  12  225.71    8.91   0
   3   9   5   69.77    7.52   0
   3  10   5   59.27    5.76   0
   3  10  14   37.24    7.98   0
   3  14  14    1.59    7.96   0
   3  15   5    9.30    5.29   0
   3  15  14    6.49    7.88   0
   3  16   5   18.71    7.28   0
   3  16  13    6.42    5.82   0
   3  17   6   79.74    5.79   0
   3  17  13    3.21    8.51   0
   3  18   6   13.98    6.41   0
   3  19   8    5.19    7.93   0
   3  19  10   -3.70    5.82   0
 -16 -10  -6   16.02   10.78   0
 -16  -7  -8   -0.30    9.39   0
 -16  -5  -9   34.34    9.96   0
 -15 -16   0   -0.19    9.44   0
 -15 -10  -6   18.61   10.00   0
 -15  -7  -8   10.27    8.72   0
 -15  -5  -9    2.67    8.64   0
 -15  -3 -10    9.09    7.37   0
 -15   0 -11    3.81    7.35   0
 -14 -16   0   -3.59    7.45   0
 -14 -10  -6   13.15    7.79   0
 -14  -7  -8    9.35    6.75   0
 -14  -5  -9   -7.85    6.60   0
 -14   5 -12   50.25   10.43   0
 -13 -15  -1   -4.61    7.60   0
 -13 -11  -5  122.51    8.02   0
 -13  -2 -10    7.25    8.07   0
 -13   1 -11    2.89    7.80   0
 -13   5 -12  -18.39    6.92   0
 -13   6 -12    1.65   10.00   0
 -12 -17   3   19.44    8.58   0
 -12 -16   1   19.71    8.87   0
 -12 -14  -2   -1.44    5.62   0
 -12 -13  -3    8.44    5.22   0
 -12 -12  -4   16.81    5.30   0
 -12  -8  -7  137.10    6.37   0
 -12  -6  -8   75.65    8.07   0
 -12  -4  -9  142.75    7.43   0
 -12   2 -11    4.81    8.76   0
 -12   7 -12    2.49    8.74   0
 -11 -18   7   -7.59    7.67   0
 -11 -18  11    0.71   10.33   0
 -11 -15   0  218.20    8.48   0
 -11  -9  -6   -2.46    5.27   0
 -11  -1 -10   32.45    6.02   0
 -11   3 -11   30.61    8.17   0
 -11   9 -12    3.02    7.70   0
 -11  10 -12   47.75    9.46   0
 -11  15 -12   79.06   11.33   0
 -11  16 -12   75.22   12.76   0
 -10 -17   5    7.21    7.11   0
 -10 -13  -2  234.11    6.28   0
 -10 -12  -3   23.81    5.14   0
 -10 -11  -4   87.75    5.61   0
 -10   4 -11    4.40    6.37   0
  -9 -17   8    5.82    6.73   0
  -9 -17  11   88.35    9.22   0
  -9 -16   4    8.13    8.02   0
  -9 -14   0   23.12    5.23   0
  -9 -10  -4    7.80    7.52   0
  -9  -9  -5   95.09    6.19   0
  -9   2 -10   16.46    6.79   0
  -9   7 -11  409.08   10.67   0
  -8 -15   3   19.75    6.61   0
  -8  -8  -5   89.10    5.22   0
  -8   0  -9   80.54    5.78   0
  -8   4 -10  204.91    8.07   0
  -7 -13   1    3.30    7.41   0
  -7  -1  -8  160.08    7.92   0
  -7   2  -9    2.97    6.78   0
  -7   7 -10  163.81    8.46   0
  -7  18 -10   45.93   13.91   0
  -7  23  -9   19.48   22.46   0
  -6 -12   1   19.97    6.93   0
  -6  -7  -4  199.46    8.45   0
  -6   1  -8  155.67    7.90   0
  -6   5  -9  387.84    9.87   0
  -5 -13   5  100.26    7.57   0
  -5 -10   0    7.23    7.27   0
  -5  -7  -3  923.63   10.76   0
  -5  -4  -5   21.66    5.14   0
  -5  -2  -6  231.03    8.25   0
  -5  10  -9   16.68    7.07   0
  -5  11  -9   52.81   10.17   0
  -4  -2  -5  293.00   10.08   0
  -3 -10  15    1.18   10.75   0
  -3  -8   1    5.56    7.67   0
  -3  -8  18   69.03    9.93   0
  -3  -7  19   -2.61    8.99   0
  -3  -6  -1  113.30   10.09   0
  -3  -6  20   49.22   12.03   0
  -3   8  -7    6.62    8.17   0
  -3  25  -5   23.05    9.82   0
  -3  27  -4   14.35   10.19   0
  -2  -7  17    1.49    8.90   0
  -2  -4  -1   10.03   10.95   0
  -2  -4  20   -0.90   10.17   0
  -2  -1  -3 8628.79   44.20   0
  -2   4  -5    2.43   11.12   0
  -2   9  -6   23.19   13.08   0
  -2  28  -2    1.99    9.92   0
  -1  -5  17   15.44    8.00   0
  -1  -4  18    0.30    7.62   0
  -1  11  -5  404.82   23.66   0
  -1  27  -1   -3.87    7.80   0
   0  -4  15   -2.46    7.52   0
   0   0  19    4.10    8.08   0
   0   2  20   23.44   10.68   0
   0  18  -3   -2.48    7.41   0
   0  28   2   70.25    9.45   0
   1  -2   5   47.87   12.60   0
   1  -2  14   32.54    6.54   0
   1  -1  15    7.17    6.96   0
   1   0  16   -2.67    5.94   0
   1   1  17   29.09    7.88   0
   1   7  -1  376.37   14.58   0
   1   7  20   10.47    8.96   0
   1   8  20    7.93    8.48   0
   1  21   0   55.49    5.48   0
   1  23   1   15.81    8.48   0
   1  28   6    3.96    8.75   0
   1  28   7   -3.05    7.79   0
   2   0   9    9.70    7.60   0
   2   0  10   92.12    7.51   0
   2   1   6  413.09   11.81   0
   2   1  13  557.48   11.47   0
   2   2  14   12.19    4.61   0
   2   3  15   35.76    7.44   0
   2   4   3    3.79    8.12   0
   2   4  16   -1.42    7.81   0
   2   6  17    0.32    7.61   0
   2   9   1 1505.96   15.83   0
   2   9  18   27.89    8.89   0
   2  10  18   -9.27    9.33   0
   2  11  18   11.79    7.75   0
   2  12  18   13.92    7.57   0
   2  13  18    5.38    6.59   0
   2  14  18   -2.20    7.18   0
   2  15  18   14.90    8.05   0
   2  17   1  215.80    8.77   0
   2  20   2   67.64    6.98   0
   2  23   4    4.20    7.35   0
   2  24   6    9.66    6.05   0
   2  25   7  133.99    8.47   0
   2  25   8    0.50    6.72   0
   2  25   9   82.14    8.06   0
   2  25  10    2.89    6.77   0
   2  25  11   86.36   10.97   0
   3   5   8   29.29    7.57   0
   3   5   9    3.73    4.73   0
   3   5  10    9.67    6.98   0
   3   5  11    5.99    7.25   0
   3   6   7   86.01    6.18   0
   3   6  12  234.61    7.56   0
   3   7  13    2.95    5.28   0
   3   8   5   29.10    7.58   0
   3   8  14   59.62    7.77   0
   3   9  14    6.21    5.51   0
   3  11   4  299.11    9.17   0
   3  11  15   80.61    7.89   0
   3  12   4  601.79   10.25   0
   3  12  15  129.35    8.23   0
   3  13   4  152.17    7.54   0
   3  13  15   29.16    8.59   0
   3  14   4   36.53    7.19   0
   3  14  15   10.01    7.78   0
   3  15   4    7.99    7.18   0
   3  15  15   28.59    7.54   0
   3  16  14  149.26    6.93   0
   3  17   5    9.81    5.48   0
   3  17  14   29.91    9.11   0
   3  18  13   17.70    6.52   0
   3  19   6   10.35    6.94   0
   3  19  12   -0.79    5.58   0
   3  19  13   56.76    8.23   0
   3  20   7   17.39    7.47   0
   3  20   8  156.27    6.90   0
   3  20   9   25.39    5.89   0
   3  20  10   92.31    6.20   0
   3  20  11  -12.36    8.16   0
   3  20  12  101.98    8.48   0
 -16 -11  -5    3.32    8.85   0
 -16  -8  -7  154.95   10.03   0
 -16  -2 -10   -0.87   11.34   0
 -15 -15  -1  -16.40    8.25   0
 -15 -11  -5   68.24    9.82   0
 -15  -8  -7   76.72    9.58   0
 -15  -2 -10    7.45    9.43   0
 -15   1 -11    0.65    8.85   0
 -14 -18   5   12.87   11.22   0
 -14 -17   2    8.37    7.26   0
 -14 -15  -1    0.21    6.38   0
 -14 -14  -2   11.65    8.61   0
 -14 -13  -3  -12.91    9.12   0
 -14 -12  -4    0.93    8.11   0
 -14 -11  -5    7.25    6.32   0
 -14  -8  -7   13.44    8.22   0
 -14  -2 -10    1.60    7.71   0
 -14   1 -11   11.65    7.23   0
 -14   6 -12    3.25    9.93   0
 -13 -18   5    4.34    7.07   0
 -13 -17   3   40.52    9.12   0
 -13 -16   1   22.25    9.09   0
 -13 -14  -2   40.49    5.97   0
 -13 -13  -3    7.86    6.10   0
 -13 -12  -4  103.50    5.97   0
 -13  -8  -7   29.95    5.65   0
 -13  -6  -8    5.64    7.44   0
 -13  -4  -9    3.83    7.05   0
 -13   2 -11   14.47    8.54   0
 -13   7 -12   53.34   10.10   0
 -12 -18   6   10.20    7.43   0
 -12  -9  -6   -6.31    6.78   0
 -12  -1 -10   -5.67    7.00   0
 -12   8 -12   26.74    7.74   0
 -11 -18   9   -2.45    8.50   0
 -11 -18  10   -0.74    8.37   0
 -11 -17   4   63.49    6.91   0
 -11 -16   2  208.17    7.99   0
 -11 -14  -1   20.19    7.31   0
 -11 -11  -4   15.64    6.86   0
 -11 -10  -5   84.93    5.81   0
 -11  -7  -7    1.78    4.85   0
 -11  -5  -8   36.99    7.37   0
 -11  -3  -9   43.00    5.76   0
 -11   0 -10    7.26    8.42   0
 -11  11 -12   22.37    8.18   0
 -11  12 -12   95.07    9.82   0
 -11  13 -12    2.94   10.23   0
 -11  14 -12   13.35   10.19   0
 -10 -17   6   40.41    8.00   0
 -10 -16   3   39.05    7.92   0
 -10 -15   1   19.34    5.80   0
 -10  -8  -6    2.80    4.98   0
 -10  -2  -9    8.48    6.14   0
 -10   1 -10  272.88    8.88   0
 -10   5 -11  200.35    8.75   0
  -9 -17   9  182.12    8.85   0
  -9 -17  10    5.62    6.64   0
  -9 -15   2   -0.75    5.15   0
  -9 -13  -1  103.48    5.76   0
  -9 -12  -2   -6.37    6.93   0
  -9 -11  -3  134.02    7.80   0
  -9  -7  -6    0.10    7.05   0
  -9  -1  -9  238.01    6.81   0
  -9   8 -11  143.57    9.43   0
  -9  18 -11    2.04   11.42   0
  -8 -16   7   18.23    8.24   0
  -8 -13   0    0.67    4.97   0
  -8 -12  -1   69.59    7.22   0
  -8  -9  -4   13.73    6.44   0
  -8  -6  -6  230.61    8.01   0
  -8  -2  -8   20.24    7.29   0
  -8  21 -10   28.35   16.08   0
  -7 -14   3   85.59    7.09   0
  -7 -14  16    1.83   12.56   0
  -7 -12   0  123.52    8.11   0
  -7  -8  -4  448.97    7.75   0
  -7  -5  -6   51.70    5.22   0
  -7  -3  -7   12.02    4.73   0
  -7   8 -10  152.99    9.21   0
  -6 -13   3  180.23    8.25   0
  -6 -11   0   68.79    6.90   0
  -6  -8  -3    4.06    7.28   0
  -5 -12   3  109.04    6.91   0
  -5  -9  -1  123.84    7.65   0
  -5  -8  -2   11.71    4.89   0
  -5   4  -8   -1.12    6.30   0
  -5  12  -9   40.13    9.46   0
  -5  13  -9   39.57    9.75   0
  -5  14  -9    5.68    9.57   0
  -4 -12   6    1.75    6.05   0
  -4   9  -8   11.86    8.33   0
  -3  -7   0 1046.64   14.15   0
  -3  18  -7   28.26   14.53   0
  -3  29  -3   36.12   11.35   0
  -2  22  -5   14.92    9.09   0
  -1  -8   9  217.06   16.98   0
  -1  -8  10   -0.07    9.71   0
  -1  -7  14   79.68    8.69   0
  -1  -6  16   26.05    8.19   0
  -1  -3  19   80.00    8.99   0
  -1  -2  20   64.42   11.27   0
  -1   0  21    2.76   11.38   0
  -1  15  -5   40.98   10.36   0
   0  22  -2  337.69   10.12   0
   0  24  -1    2.60    7.36   0
[truncated: 11,386,303 more chars]
